# Supplementary material for: Metabolomic and transcriptomic analyses reveal the mechanism of sweet-acidic taste formation during pineapple fruit development
Source: Front Plant Sci. 2022 Sep 8;13:971506. doi: 10.3389/fpls.2022.971506 (PMC9493369; doi:10.3389/fpls.2022.971506)
Supplement: Supplementary file 1 [file Table_1.XLSX]

## Sheet: 56 amino acids and derivatives
Index	Q1 (Da)	Molecular Weight (Da)	Formula	Ionization model	Compounds	Class I	Class II
Qingke_Rfmb319-1-2	130.09	129.079	C6H11NO2	[M+H]+	Pipecolic acid	Amino acids and derivatives	Amino acids and derivatives
Qingke_Rfmb320-1-3	144.1	143.095	C7H13NO2	[M+H]+	1,2-N-Methylpipecolic acid	Amino acids and derivatives	Amino acids and derivatives
mws0001	133.06	132.054	C4H8N2O3	[M+H]+	L-Asparagine Anhydrous	Amino acids and derivatives	Amino acids and derivatives
mws0193	190.12	189.111	C7H15N3O3	[M+H]+	L-Homocitrulline	Amino acids and derivatives	Amino acids and derivatives
mws0216	132.07	131.058	C5H9NO3	[M+H]+	Trans-4-Hydroxy-L-proline	Amino acids and derivatives	Amino acids and derivatives
mws0219	132.03	133.038	C4H7NO4	[M-H]-	L-AsparticAcid	Amino acids and derivatives	Amino acids and derivatives
mws0227	132.1	131.095	C6H13NO2	[M+H]+	L-Leucine	Amino acids and derivatives	Amino acids and derivatives
mws0230	120.07	119.058	C4H9NO3	[M+H]+	L-(-)-Threonine	Amino acids and derivatives	Amino acids and derivatives
mws0250	182.08	181.074	C9H11NO3	[M+H]+	L-(-)-Tyrosine	Amino acids and derivatives	Amino acids and derivatives
mws0254	156.08	155.069	C6H9N3O2	[M+H]+	L-Histidine	Amino acids and derivatives	Amino acids and derivatives
mws0256	118.09	117.079	C5H11NO2	[M+H]+	L-Valine	Amino acids and derivatives	Amino acids and derivatives
mws0258	132.1	131.095	C6H13NO2	[M+H]+	L-Isoleucine	Amino acids and derivatives	Amino acids and derivatives
mws0260	175.12	174.112	C6H14N4O2	[M+H]+	L-(+)-Arginine	Amino acids and derivatives	Amino acids and derivatives
mws0279	170.09	169.085	C7H11N3O2	[M+H]+	3-N-Methyl-L-histidine	Amino acids and derivatives	Amino acids and derivatives
mws0282	203.08	204.09	C11H12N2O2	[M-H]-	L-Tryptophan	Amino acids and derivatives	Amino acids and derivatives
mws0582	322.11	321.099	C11H19N3O6S	[M+H]+	S-(methyl)glutathione	Amino acids and derivatives	Amino acids and derivatives
mws0629	281.11	280.106	C13H16N2O5	[M+H]+	Asp-phe	Amino acids and derivatives	Amino acids and derivatives
mws0636	313.15	312.147	C18H20N2O3	[M+H]+	Phe-Phe	Amino acids and derivatives	Amino acids and derivatives
mws0736	189.12	188.116	C8H16N2O3	[M+H]+	N-Glycyl-L-leucine	Amino acids and derivatives	Amino acids and derivatives
mws0890	104.04	105.043	C3H7NO3	[M-H]-	L-Serine	Amino acids and derivatives	Amino acids and derivatives
mws0923	200.05	199.04	C9H10ClNO2	[M+H]+	L-2-chlorophenylalanine	Amino acids and derivatives	Amino acids and derivatives
mws1050	148.06	147.053	C5H9NO4	[M+H]+	O-Acetylserine	Amino acids and derivatives	Amino acids and derivatives
mws1587	132.1	131.095	C6H13NO2	[M+H]+	α-Aminocaproic acid	Amino acids and derivatives	Amino acids and derivatives
mws4134	611.14	612.152	C20H32N6O12S2	[M-H]-	Oxidized Glutathione	Amino acids and derivatives	Amino acids and derivatives
mws4176	237.12	236.116	C12H16N2O3	[M+H]+	Alanylphenylalanine	Amino acids and derivatives	Amino acids and derivatives
mws5035	279.17	278.163	C15H22N2O3	[M+H]+	Leucylphenylalanine	Amino acids and derivatives	Amino acids and derivatives
mws5037	203.14	202.132	C9H18N2O3	[M+H]+	Alanylleucine	Amino acids and derivatives	Amino acids and derivatives
mws5041	189.12	188.116	C8H16N2O3	[M+H]+	Glycylisoleucine	Amino acids and derivatives	Amino acids and derivatives
mws5042	223.11	222.1	C11H14N2O3	[M+H]+	Glycylphenylalanine	Amino acids and derivatives	Amino acids and derivatives
pmb2591	245.09	246.1	C13H14N2O3	[M-H]-	Acetyltryptophan	Amino acids and derivatives	Amino acids and derivatives
pme0006	116.07	115.063	C5H9NO2	[M+H]+	L-Proline	Amino acids and derivatives	Amino acids and derivatives
pme0008	176.1	175.096	C6H13N3O3	[M+H]+	L-Citrulline	Amino acids and derivatives	Amino acids and derivatives
pme0014	148.06	147.053	C5H9NO4	[M+H]+	L-Glutamic acid	Amino acids and derivatives	Amino acids and derivatives
pme0021	166.09	165.07	C9H11NO2	[M+H]+	L-Phenylalanine	Amino acids and derivatives	Amino acids and derivatives
pme0026	147.11	146.106	C6H14N2O2	[M+H]+	L-(+)-Lysine	Amino acids and derivatives	Amino acids and derivatives
pme0122	189.12	188.116	C8H16N2O3	[M+H]+	N6-Acetyl-L-lysine	Amino acids and derivatives	Amino acids and derivatives
pme0128	159.08	160.085	C6H12N2O3	[M-H]-	AlanylAlanine	Amino acids and derivatives	Amino acids and derivatives
pme0137	187.07	188.08	C7H12N2O4	[M-H]-	N-α-Acetyl-L-glutamine	Amino acids and derivatives	Amino acids and derivatives
pme0170	217.13	216.122	C8H16N4O3	[M+H]+	N-α-Acetyl-L-arginine	Amino acids and derivatives	Amino acids and derivatives
pme0181	170.09	169.085	C7H11N3O2	[M+H]+	1-Methylhistidine	Amino acids and derivatives	Amino acids and derivatives
pme0193	147.08	146.069	C5H10N2O3	[M+H]+	L-Glutamine	Amino acids and derivatives	Amino acids and derivatives
pme0253	174.11	173.105	C8H15NO3	[M+H]+	N-Acetyl-L-leucine	Amino acids and derivatives	Amino acids and derivatives
pme0278	191.1	190.095	C7H14N2O4	[M+H]+	2,6-Diaminooimelic acid	Amino acids and derivatives	Amino acids and derivatives
pme1002	138.09	137.084	C8H11NO	[M+H]+	L-Tyramine	Amino acids and derivatives	Amino acids and derivatives
pme1086	306.08	307.084	C10H17N3O6S	[M-H]-	Glutathione reduced form	Amino acids and derivatives	Amino acids and derivatives
pme1210	150.06	149.051	C5H11NO2S	[M+H]+	L-Methionine	Amino acids and derivatives	Amino acids and derivatives
pme1228	221.09	220.085	C11H12N2O3	[M+H]+	5-Hydroxy-L-tryptophan	Amino acids and derivatives	Amino acids and derivatives
pme1286	385.13	384.122	C14H20N6O5S	[M+H]+	S-(5'-Adenosy)-L-homocysteine	Amino acids and derivatives	Amino acids and derivatives
pme1419	164.07	199.043	C6H14ClNO2S	[M-Cl]+	L-Methionine methyl ester	Amino acids and derivatives	Amino acids and derivatives
pme2122	112.09	111.08	C5H9N3	[M+H]+	Histamine	Amino acids and derivatives	Amino acids and derivatives
pme2743	194.08	193.074	C10H11NO3	[M+H]+	N-Phenylacetylglycine	Amino acids and derivatives	Amino acids and derivatives
pme2890	269.06	268.055	C8H16N2O4S2	[M+H]+	L-Homocystine	Amino acids and derivatives	Amino acids and derivatives
pme3017	104.07	103.063	C4H9NO2	[M+H]+	2-Aminoisobutyric acid	Amino acids and derivatives	Amino acids and derivatives
pme3033	104.07	103.063	C4H9NO2	[M+H]+	N,N-Dimethylglycine	Amino acids and derivatives	Amino acids and derivatives
pme3388	189.13	188.127	C7H16N4O2	[M+H]+	H-HomoArg-OH	Amino acids and derivatives	Amino acids and derivatives
pme3827	198.08	197.069	C9H11NO4	[M+H]+	3,4-Dihydroxyphenylalanine	Amino acids and derivatives	Amino acids and derivatives

## Sheet: 81 phenolic acids
Index	Q1 (Da)	Molecular Weight (Da)	Formula	Ionization model	Compounds	Class I	Class II
Huasheng_mad1424	427.05	426.043	C17H14O13	[M+H]+	Ditartaroyl-hydroxylcoumarin	Phenolic acids	Phenolic acids
Lmhn002573	399.09	400.101	C17H20O11	[M-H]-	Sinapoylglucuronic acid	Phenolic acids	Phenolic acids
Lmhn002926	279.05	280.058	C13H12O7	[M-H]-	p-Coumaroylmalic acid	Phenolic acids	Phenolic acids
Lmhn003074	309.06	310.069	C14H14O8	[M-H]-	Feruloylmalic acid	Phenolic acids	Phenolic acids
Lmhn003240	237.04	238.048	C11H10O6	[M-H]-	Benzoylmalic acid	Phenolic acids	Phenolic acids
Lmnp001551	167.07	166.063	C9H10O3	[M+H]+	3-Methoxy-4-hydroxy-acetophenone	Phenolic acids	Phenolic acids
Lmtn002565	329.11	330.095	C14H18O9	[M-H]-	1'-O-Vanilloyl-β-D-glucoside	Phenolic acids	Phenolic acids
Zmhn001883	329.09	330.095	C14H18O9	[M-H]-	Vanillic acid glycoside	Phenolic acids	Phenolic acids
Zmhn001926	299.08	300.084	C13H16O8	[M-H]-	Salicylic acid O-glycoside	Phenolic acids	Phenolic acids
Zmhn002227	385.11	386.121	C17H22O10	[M-H]-	Sinapic acid-glycoside	Phenolic acids	Phenolic acids
Zmhn002242	341.09	342.095	C15H18O9	[M-H]-	Caffeoyl glucose	Phenolic acids	Phenolic acids
Zmhn002301	325.09	326.1	C15H18O8	[M-H]-	p-Coumaric acid-O-glycoside	Phenolic acids	Phenolic acids
Zmhn002422	355.1	356.11	C16H20O9	[M-H]-	Feruloyl glucose	Phenolic acids	Phenolic acids
Zmhn002513	385.11	386.121	C17H22O10	[M-H]-	Isosinapic acid-hexoside	Phenolic acids	Phenolic acids
Zmxn001997	299.08	300.084	C13H16O8	[M-H]-	Isosalicylic acid O-glycoside	Phenolic acids	Phenolic acids
mws0014	193.05	194.058	C10H10O4	[M-H]-	Ferulic acid	Phenolic acids	Phenolic acids
mws0027	197.05	198.053	C9H10O5	[M-H]-	Syringic acid	Phenolic acids	Phenolic acids
mws0028	167.03	168.042	C8H8O4	[M-H]-	Vanillic acid	Phenolic acids	Phenolic acids
mws0178	353.09	354.095	C16H18O9	[M-H]-	Chlorogenic acid	Phenolic acids	Phenolic acids
mws0179	367.1	368.111	C17H20O9	[M-H]-	Chlorogenic acid methyl ester	Phenolic acids	Phenolic acids
mws0458	151.04	152.047	C8H8O3	[M-H]-	Vanillin	Phenolic acids	Phenolic acids
mws0628	121.03	122.037	C7H6O2	[M-H]-	4-Hydroxybenzaldehyde	Phenolic acids	Phenolic acids
mws0853	209.08	210.089	C11H14O4	[M-H]-	Sinapyl alcohol	Phenolic acids	Phenolic acids
mws0898	165.09	164.084	C10H12O2	[M+H]+	Isoeugenol	Phenolic acids	Phenolic acids
mws0921	149.06	150.068	C9H10O2	[M-H]-	p-Coumaryl alcohol	Phenolic acids	Phenolic acids
mws1024	147.05	148.052	C9H8O2	[M-H]-	p-Coumaraldehyde	Phenolic acids	Phenolic acids
mws1078	138.05	137.048	C7H7NO2	[M+H]+	Anthranilic Acid	Phenolic acids	Phenolic acids
mws1195	179.07	178.063	C10H10O3	[M+H]+	Methyl p-coumarate	Phenolic acids	Phenolic acids
mws1200	177.06	178.063	C10H10O3	[M-H]-	Trans-4-Hydroxycinnamic Acid Methyl Ester	Phenolic acids	Phenolic acids
mws1212	209.08	208.074	C11H12O4	[M+H]+	Methyl ferulate	Phenolic acids	Phenolic acids
mws1336	138.05	137.048	C7H7NO2	[M+H]+	4-Aminobenzoic acid	Phenolic acids	Phenolic acids
mws1350	181.05	182.058	C9H10O4	[M-H]-	Syringic Aldehyde	Phenolic acids	Phenolic acids
mws1354	193.05	194.058	C10H10O4	[M-H]-	Trans-ferulic acid	Phenolic acids	Phenolic acids
mws1503	133.06	132.058	C9H8O	[M+H]+	Cinnamaldehyde	Phenolic acids	Phenolic acids
mws1521	285.1	286.105	C13H18O7	[M-H]-	Salicin	Phenolic acids	Phenolic acids
mws1584	515.12	516.127	C25H24O12	[M-H]-	Cynarin	Phenolic acids	Phenolic acids
mws2108	353.09	354.095	C16H18O9	[M-H]-	Cryptochlorogenic acid	Phenolic acids	Phenolic acids
mws2212	179.03	180.042	C9H8O4	[M-H]-	Caffeic acid	Phenolic acids	Phenolic acids
mws2213	147.05	148.052	C9H8O2	[M-H]-	Cinnamic acid	Phenolic acids	Phenolic acids
mws4085	223.06	224.068	C11H12O5	[M-H]-	Sinapic acid	Phenolic acids	Phenolic acids
pmb0423	193.05	194.058	C10H10O4	[M-H]-	Hydroxy-methoxycinnamate	Phenolic acids	Phenolic acids
pmb0752	369.12	368.111	C17H20O9	[M+H]+	3-O-Feruloyl quinic acid	Phenolic acids	Phenolic acids
pmb2620	207.07	208.074	C11H12O4	[M-H]-	3,4-Dimethoxycinnamic acid	Phenolic acids	Phenolic acids
pmb2871	315.07	316.079	C13H16O9	[M-H]-	2,5-Dihydroxy benzoic acid O-hexside	Phenolic acids	Phenolic acids
pmb2936	591.17	592.179	C28H32O14	[M-H]-	Disinapoyl hexoside	Phenolic acids	Phenolic acids
pmb2940	385.11	386.121	C17H22O10	[M-H]-	1-O-β-D-Glucopyranosyl sinapate	Phenolic acids	Phenolic acids
pmb3068	337.09	338.1	C16H18O8	[M-H]-	1-O-p-Coumaroyl quinic acid	Phenolic acids	Phenolic acids
pmb3072	481.14	482.142	C22H26O12	[M-H]-	3-O-p-coumaroyl shikimic acid O-hexoside	Phenolic acids	Phenolic acids
pmb3074	337.09	338.1	C16H18O8	[M-H]-	3-O-p-Coumaroyl quinic acid	Phenolic acids	Phenolic acids
pmb3107	359.1	360.106	C15H20O10	[M-H]-	Syringic acid O-glucoside	Phenolic acids	Phenolic acids
pme0241	123.04	122.037	C7H6O2	[M+H]+	Benzoic acid	Phenolic acids	Phenolic acids
pme0281	165.02	166.027	C8H6O4	[M-H]-	Terephthalic acid	Phenolic acids	Phenolic acids
pme1439	165.05	164.047	C9H8O3	[M+H]+	p-Coumaric acid	Phenolic acids	Phenolic acids
pme1816	353.09	354.095	C16H18O9	[M-H]-	Neochlorogenic acid(5-O-Caffeoylquinic acid)	Phenolic acids	Phenolic acids
pme3437	213.08	212.068	C10H12O5	[M+H]+	Eudesmic acid(3,4,5-trimethoxybenzoic acid)	Phenolic acids	Phenolic acids
pme3443	207.07	208.074	C11H12O4	[M-H]-	Sinapinaldehyde	Phenolic acids	Phenolic acids
pmf0424	517.13	516.127	C25H24O12	[M+H]+	Isochlorogenic acid B	Phenolic acids	Phenolic acids
pmf0440	163.08	162.068	C10H10O2	[M+H]+	4-MethoxycinnaMaldehyde	Phenolic acids	Phenolic acids
pmn001318	383.11	384.121	C21H20O7	[M-H]-	1,3-O-Di-p-Coumaroyl glycerol	Phenolic acids	Phenolic acids
pmn001319	413.12	414.131	C22H22O8	[M-H]-	1-O-Feruloyl-3-O-p-Coumaroyl glycerol	Phenolic acids	Phenolic acids
pmn001320	237.08	238.084	C12H14O5	[M-H]-	1-O-p-Cumaroylglycerol	Phenolic acids	Phenolic acids
pmn001367	315.07	316.079	C13H16O9	[M-H]-	Protocatechuic acid-4-glucoside	Phenolic acids	Phenolic acids
pmn001419	325.09	326.1	C15H18O8	[M-H]-	1-O-[(E)-p-Cumaroyl]-β-D-glucopyranose	Phenolic acids	Phenolic acids
pmn001420	341.09	342.095	C15H18O9	[M-H]-	1-O-[(E)-Caffeoyl]-β-D-glucopyranose	Phenolic acids	Phenolic acids
pmn001511	285.1	286.105	C13H18O7	[M-H]-	3-Hydroxy-5-Methylphenol-1-Oxy-β-D-Glucose	Phenolic acids	Phenolic acids
pmn001517	329.12	330.131	C15H22O8	[M-H]-	3,4,5-Trimethoxyphenyl-β-D-Glucopyranoside	Phenolic acids	Phenolic acids
pmn001523	473.04	474.043	C21H14O13	[M-H]-	1,3-Trigallic acid	Phenolic acids	Phenolic acids
pmn001612	753.22	754.232	C34H42O19	[M-H]-	β-D-(3-Mustard acyl)-fructosyl-α-D-(6-mustard acyl)glucoside	Phenolic acids	Phenolic acids
pmn001669	237.08	238.084	C12H14O5	[M-H]-	Methyl sinapate	Phenolic acids	Phenolic acids
pmn001671	547.17	548.174	C23H32O15	[M-H]-	β-D-Furanofructosyl-α-D-(6-mustard acyl)glucoside	Phenolic acids	Phenolic acids
pmn001672	547.17	548.174	C23H32O15	[M-H]-	β-D-Furanofructosyl-α-D-(3-mustard acyl)glucoside	Phenolic acids	Phenolic acids
pmn001682	179.03	180.042	C9H8O4	[M-H]-	Sorbic acid	Phenolic acids	Phenolic acids
pmn001695	371.1	372.106	C16H20O10	[M-H]-	Trihydroxycinnamoylquinic acid	Phenolic acids	Phenolic acids
pmn001710	521.13	522.137	C24H26O13	[M-H]-	Rosmarinyl Glucoside	Phenolic acids	Phenolic acids
pmn001714	655.3	328.133	C16H24O7	[2M-H]-	3-Hydroxy-4-isopropylbenzylalchol 3-glucoside	Phenolic acids	Phenolic acids
pmn001738	403.12	404.132	C17H24O11	[M-H]-	Oleoside 11-methyl ester	Phenolic acids	Phenolic acids
pmp000086	269.1	268.095	C13H16O6	[M+H]+	1-Feruloyl-sn-glycerol	Phenolic acids	Phenolic acids
pmp000091	445.15	444.142	C23H24O9	[M+H]+	Glyceryl 1,3-diferulate	Phenolic acids	Phenolic acids
pmp000232	339.11	338.1	C16H18O8	[M+H]+	Cis-3-p-coumaric quinic acid	Phenolic acids	Phenolic acids
pmp001086	127.04	126.032	C6H6O3	[M+H]+	5-Hydroxymethylfurfural	Phenolic acids	Phenolic acids
pmp001285	149.02	148.016	C8H4O3	[M+H]+	Phthalic anhydride	Phenolic acids	Phenolic acids

## Sheet: 31 nucleotides and derivatives
Index	Q1 (Da)	Molecular Weight (Da)	Formula	Ionization model	Compounds	Class I	Class II
mws0248	243.06	244.07	C9H12N2O6	[M-H]-	Uridine	Nucleotides and derivatives	Nucleotides and derivatives
mws0255	112.05	111.043	C4H5N3O	[M+H]+	Cytosine	Nucleotides and derivatives	Nucleotides and derivatives
mws0572	126.07	125.059	C5H7N3O	[M+H]+	5-Methylcytosine	Nucleotides and derivatives	Nucleotides and derivatives
mws0609	344.04	345.047	C10H12N5O7P	[M-H]-	Guanosine 3',5'-cyclic monophosphate	Nucleotides and derivatives	Nucleotides and derivatives
mws0668	283.07	284.076	C10H12N4O6	[M-H]-	Xanthosine	Nucleotides and derivatives	Nucleotides and derivatives
mws0675	335.06	334.057	C11H15N2O8P	[M+H]+	β-Nicotinamide mononucleotide	Nucleotides and derivatives	Nucleotides and derivatives
mws0847	150.08	149.07	C6H7N5	[M+H]+	1-Methyladenine	Nucleotides and derivatives	Nucleotides and derivatives
mws0884	328.05	329.053	C10H12N5O6P	[M-H]-	Cyclic AMP	Nucleotides and derivatives	Nucleotides and derivatives
mws1060	267.07	268.081	C10H12N4O5	[M-H]-	9-(β-D-Arabinofuranosyl)hypoxanthine	Nucleotides and derivatives	Nucleotides and derivatives
pmb0981	348.07	347.063	C10H14N5O7P	[M+H]+	Adenosine 5'-monophosphate	Nucleotides and derivatives	Nucleotides and derivatives
pmb0998	364.07	363.058	C10H14N5O8P	[M+H]+	Guanosine 5'-monophosphate	Nucleotides and derivatives	Nucleotides and derivatives
pmb2922	565.05	566.055	C15H24N2O17P2	[M-H]-	Uridine 5'-diphospho-D-glucose	Nucleotides and derivatives	Nucleotides and derivatives
pme0033	137.05	136.039	C5H4N4O	[M+H]+	Hypoxanthine	Nucleotides and derivatives	Nucleotides and derivatives
pme0040	136.06	135.054	C5H5N5	[M+H]+	Adenine	Nucleotides and derivatives	Nucleotides and derivatives
pme0183	152.06	151.049	C5H5N5O	[M+H]+	2-Hydroxy-6-aminopurine	Nucleotides and derivatives	Nucleotides and derivatives
pme0230	268.1	267.097	C10H13N5O4	[M+H]+	Adenosine	Nucleotides and derivatives	Nucleotides and derivatives
pme0264	243.1	242.09	C10H14N2O5	[M+H]+	Thymidine	Nucleotides and derivatives	Nucleotides and derivatives
pme1109	152.06	151.049	C5H5N5O	[M+H]+	Guanine	Nucleotides and derivatives	Nucleotides and derivatives
pme1173	137.05	136.039	C5H4N4O	[M+H]+	Allopurinol	Nucleotides and derivatives	Nucleotides and derivatives
pme1178	284.1	283.092	C10H13N5O5	[M+H]+	Guanosine	Nucleotides and derivatives	Nucleotides and derivatives
pme1194	228.1	227.091	C9H13N3O4	[M+H]+	Deoxycytidine	Nucleotides and derivatives	Nucleotides and derivatives
pme1474	298.1	297.09	C11H15N5O3S	[M+H]+	5'-Deoxy-5'-(methylthio)adenosine	Nucleotides and derivatives	Nucleotides and derivatives
pme2746	784.15	785.157	C27H33N9O15P2	[M-H]-	Flavin adenine dinucleotide(FAD)	Nucleotides and derivatives	Nucleotides and derivatives
pme3007	402.99	404.002	C9H14N2O12P2	[M-H]-	Uridine 5'-diphosphate	Nucleotides and derivatives	Nucleotides and derivatives
pme3174	324.06	323.052	C9H14N3O8P	[M+H]+	Cytidine 5'-monophosphate(Cytidylic acid)	Nucleotides and derivatives	Nucleotides and derivatives
pme3184	332.08	331.068	C10H14N5O6P	[M+H]+	2'-Deoxyadenosine-5'-monophosphate	Nucleotides and derivatives	Nucleotides and derivatives
pme3188	323.03	324.036	C9H13N2O9P	[M-H]-	Uridine 5'-monophosphate	Nucleotides and derivatives	Nucleotides and derivatives
pme3337	384.12	383.108	C14H17N5O8	[M+H]+	N6-Succinyl Adenosine	Nucleotides and derivatives	Nucleotides and derivatives
pme3732	244.09	243.086	C9H13N3O5	[M+H]+	Cytidine	Nucleotides and derivatives	Nucleotides and derivatives
pme3967	312.13	311.123	C12H17N5O5	[M+H]+	2-(Dimethylamino)guanosine	Nucleotides and derivatives	Nucleotides and derivatives
pme3968	166.07	165.065	C6H7N5O	[M+H]+	7-Methylguanine	Nucleotides and derivatives	Nucleotides and derivatives

## Sheet: 1
Supplementary Table 1: A list of 280 primary metabolites identified in pineapple fruits
Index	Q1 (Da)	Molecular Weight (Da)	Formula	Ionization model	Compounds	Class I	Class II
Qingke_Rfmb319-1-2	130.09	129.079	C6H11NO2	[M+H]+	Pipecolic acid	Amino acids and derivatives	Amino acids and derivatives
Qingke_Rfmb320-1-3	144.1	143.095	C7H13NO2	[M+H]+	1,2-N-Methylpipecolic acid	Amino acids and derivatives	Amino acids and derivatives
mws0001	133.06	132.054	C4H8N2O3	[M+H]+	L-Asparagine Anhydrous	Amino acids and derivatives	Amino acids and derivatives
mws0193	190.12	189.111	C7H15N3O3	[M+H]+	L-Homocitrulline	Amino acids and derivatives	Amino acids and derivatives
mws0216	132.07	131.058	C5H9NO3	[M+H]+	Trans-4-Hydroxy-L-proline	Amino acids and derivatives	Amino acids and derivatives
mws0219	132.03	133.038	C4H7NO4	[M-H]-	L-AsparticAcid	Amino acids and derivatives	Amino acids and derivatives
mws0227	132.1	131.095	C6H13NO2	[M+H]+	L-Leucine	Amino acids and derivatives	Amino acids and derivatives
mws0230	120.07	119.058	C4H9NO3	[M+H]+	L-(-)-Threonine	Amino acids and derivatives	Amino acids and derivatives		1
mws0250	182.08	181.074	C9H11NO3	[M+H]+	L-(-)-Tyrosine	Amino acids and derivatives	Amino acids and derivatives
mws0254	156.08	155.069	C6H9N3O2	[M+H]+	L-Histidine	Amino acids and derivatives	Amino acids and derivatives
mws0256	118.09	117.079	C5H11NO2	[M+H]+	L-Valine	Amino acids and derivatives	Amino acids and derivatives
mws0258	132.1	131.095	C6H13NO2	[M+H]+	L-Isoleucine	Amino acids and derivatives	Amino acids and derivatives
mws0260	175.12	174.112	C6H14N4O2	[M+H]+	L-(+)-Arginine	Amino acids and derivatives	Amino acids and derivatives
mws0279	170.09	169.085	C7H11N3O2	[M+H]+	3-N-Methyl-L-histidine	Amino acids and derivatives	Amino acids and derivatives
mws0282	203.08	204.09	C11H12N2O2	[M-H]-	L-Tryptophan	Amino acids and derivatives	Amino acids and derivatives
mws0582	322.11	321.099	C11H19N3O6S	[M+H]+	S-(methyl)glutathione	Amino acids and derivatives	Amino acids and derivatives
mws0629	281.11	280.106	C13H16N2O5	[M+H]+	Asp-phe	Amino acids and derivatives	Amino acids and derivatives
mws0636	313.15	312.147	C18H20N2O3	[M+H]+	Phe-Phe	Amino acids and derivatives	Amino acids and derivatives
mws0736	189.12	188.116	C8H16N2O3	[M+H]+	N-Glycyl-L-leucine	Amino acids and derivatives	Amino acids and derivatives
mws0890	104.04	105.043	C3H7NO3	[M-H]-	L-Serine	Amino acids and derivatives	Amino acids and derivatives
mws0923	200.05	199.04	C9H10ClNO2	[M+H]+	L-2-chlorophenylalanine	Amino acids and derivatives	Amino acids and derivatives
mws1050	148.06	147.053	C5H9NO4	[M+H]+	O-Acetylserine	Amino acids and derivatives	Amino acids and derivatives
mws1587	132.1	131.095	C6H13NO2	[M+H]+	α-Aminocaproic acid	Amino acids and derivatives	Amino acids and derivatives
mws4134	611.14	612.152	C20H32N6O12S2	[M-H]-	Oxidized Glutathione	Amino acids and derivatives	Amino acids and derivatives
mws4176	237.12	236.116	C12H16N2O3	[M+H]+	Alanylphenylalanine	Amino acids and derivatives	Amino acids and derivatives
mws5035	279.17	278.163	C15H22N2O3	[M+H]+	Leucylphenylalanine	Amino acids and derivatives	Amino acids and derivatives
mws5037	203.14	202.132	C9H18N2O3	[M+H]+	Alanylleucine	Amino acids and derivatives	Amino acids and derivatives
mws5041	189.12	188.116	C8H16N2O3	[M+H]+	Glycylisoleucine	Amino acids and derivatives	Amino acids and derivatives
mws5042	223.11	222.1	C11H14N2O3	[M+H]+	Glycylphenylalanine	Amino acids and derivatives	Amino acids and derivatives
pmb2591	245.09	246.1	C13H14N2O3	[M-H]-	Acetyltryptophan	Amino acids and derivatives	Amino acids and derivatives
pme0006	116.07	115.063	C5H9NO2	[M+H]+	L-Proline	Amino acids and derivatives	Amino acids and derivatives
pme0008	176.1	175.096	C6H13N3O3	[M+H]+	L-Citrulline	Amino acids and derivatives	Amino acids and derivatives
pme0014	148.06	147.053	C5H9NO4	[M+H]+	L-Glutamic acid	Amino acids and derivatives	Amino acids and derivatives
pme0021	166.09	165.07	C9H11NO2	[M+H]+	L-Phenylalanine	Amino acids and derivatives	Amino acids and derivatives
pme0026	147.11	146.106	C6H14N2O2	[M+H]+	L-(+)-Lysine	Amino acids and derivatives	Amino acids and derivatives
pme0122	189.12	188.116	C8H16N2O3	[M+H]+	N6-Acetyl-L-lysine	Amino acids and derivatives	Amino acids and derivatives
pme0128	159.08	160.085	C6H12N2O3	[M-H]-	AlanylAlanine	Amino acids and derivatives	Amino acids and derivatives
pme0137	187.07	188.08	C7H12N2O4	[M-H]-	N-α-Acetyl-L-glutamine	Amino acids and derivatives	Amino acids and derivatives
pme0170	217.13	216.122	C8H16N4O3	[M+H]+	N-α-Acetyl-L-arginine	Amino acids and derivatives	Amino acids and derivatives
pme0181	170.09	169.085	C7H11N3O2	[M+H]+	1-Methylhistidine	Amino acids and derivatives	Amino acids and derivatives
pme0193	147.08	146.069	C5H10N2O3	[M+H]+	L-Glutamine	Amino acids and derivatives	Amino acids and derivatives
pme0253	174.11	173.105	C8H15NO3	[M+H]+	N-Acetyl-L-leucine	Amino acids and derivatives	Amino acids and derivatives
pme0278	191.1	190.095	C7H14N2O4	[M+H]+	2,6-Diaminooimelic acid	Amino acids and derivatives	Amino acids and derivatives
pme1002	138.09	137.084	C8H11NO	[M+H]+	L-Tyramine	Amino acids and derivatives	Amino acids and derivatives
pme1086	306.08	307.084	C10H17N3O6S	[M-H]-	Glutathione reduced form	Amino acids and derivatives	Amino acids and derivatives
pme1210	150.06	149.051	C5H11NO2S	[M+H]+	L-Methionine	Amino acids and derivatives	Amino acids and derivatives
pme1228	221.09	220.085	C11H12N2O3	[M+H]+	5-Hydroxy-L-tryptophan	Amino acids and derivatives	Amino acids and derivatives
pme1286	385.13	384.122	C14H20N6O5S	[M+H]+	S-(5'-Adenosy)-L-homocysteine	Amino acids and derivatives	Amino acids and derivatives
pme1419	164.07	199.043	C6H14ClNO2S	[M-Cl]+	L-Methionine methyl ester	Amino acids and derivatives	Amino acids and derivatives
pme2122	112.09	111.08	C5H9N3	[M+H]+	Histamine	Amino acids and derivatives	Amino acids and derivatives
pme2743	194.08	193.074	C10H11NO3	[M+H]+	N-Phenylacetylglycine	Amino acids and derivatives	Amino acids and derivatives
pme2890	269.06	268.055	C8H16N2O4S2	[M+H]+	L-Homocystine	Amino acids and derivatives	Amino acids and derivatives
pme3017	104.07	103.063	C4H9NO2	[M+H]+	2-Aminoisobutyric acid	Amino acids and derivatives	Amino acids and derivatives
pme3033	104.07	103.063	C4H9NO2	[M+H]+	N,N-Dimethylglycine	Amino acids and derivatives	Amino acids and derivatives
pme3388	189.13	188.127	C7H16N4O2	[M+H]+	H-HomoArg-OH	Amino acids and derivatives	Amino acids and derivatives
pme3827	198.08	197.069	C9H11NO4	[M+H]+	3,4-Dihydroxyphenylalanine	Amino acids and derivatives	Amino acids and derivatives
Huasheng_mad1424	427.05	426.043	C17H14O13	[M+H]+	Ditartaroyl-hydroxylcoumarin	Phenolic acids	Phenolic acids
Lmhn002573	399.09	400.101	C17H20O11	[M-H]-	Sinapoylglucuronic acid	Phenolic acids	Phenolic acids
Lmhn002926	279.05	280.058	C13H12O7	[M-H]-	p-Coumaroylmalic acid	Phenolic acids	Phenolic acids
Lmhn003074	309.06	310.069	C14H14O8	[M-H]-	Feruloylmalic acid	Phenolic acids	Phenolic acids
Lmhn003240	237.04	238.048	C11H10O6	[M-H]-	Benzoylmalic acid	Phenolic acids	Phenolic acids
Lmnp001551	167.07	166.063	C9H10O3	[M+H]+	3-Methoxy-4-hydroxy-acetophenone	Phenolic acids	Phenolic acids
Lmtn002565	329.11	330.095	C14H18O9	[M-H]-	1'-O-Vanilloyl-β-D-glucoside	Phenolic acids	Phenolic acids
Zmhn001883	329.09	330.095	C14H18O9	[M-H]-	Vanillic acid glycoside	Phenolic acids	Phenolic acids
Zmhn001926	299.08	300.084	C13H16O8	[M-H]-	Salicylic acid O-glycoside	Phenolic acids	Phenolic acids
Zmhn002227	385.11	386.121	C17H22O10	[M-H]-	Sinapic acid-glycoside	Phenolic acids	Phenolic acids
Zmhn002242	341.09	342.095	C15H18O9	[M-H]-	Caffeoyl glucose	Phenolic acids	Phenolic acids
Zmhn002301	325.09	326.1	C15H18O8	[M-H]-	p-Coumaric acid-O-glycoside	Phenolic acids	Phenolic acids
Zmhn002422	355.1	356.11	C16H20O9	[M-H]-	Feruloyl glucose	Phenolic acids	Phenolic acids
Zmhn002513	385.11	386.121	C17H22O10	[M-H]-	Isosinapic acid-hexoside	Phenolic acids	Phenolic acids
Zmxn001997	299.08	300.084	C13H16O8	[M-H]-	Isosalicylic acid O-glycoside	Phenolic acids	Phenolic acids
mws0014	193.05	194.058	C10H10O4	[M-H]-	Ferulic acid	Phenolic acids	Phenolic acids
mws0027	197.05	198.053	C9H10O5	[M-H]-	Syringic acid	Phenolic acids	Phenolic acids
mws0028	167.03	168.042	C8H8O4	[M-H]-	Vanillic acid	Phenolic acids	Phenolic acids
mws0178	353.09	354.095	C16H18O9	[M-H]-	Chlorogenic acid	Phenolic acids	Phenolic acids
mws0179	367.1	368.111	C17H20O9	[M-H]-	Chlorogenic acid methyl ester	Phenolic acids	Phenolic acids
mws0458	151.04	152.047	C8H8O3	[M-H]-	Vanillin	Phenolic acids	Phenolic acids
mws0628	121.03	122.037	C7H6O2	[M-H]-	4-Hydroxybenzaldehyde	Phenolic acids	Phenolic acids
mws0853	209.08	210.089	C11H14O4	[M-H]-	Sinapyl alcohol	Phenolic acids	Phenolic acids
mws0898	165.09	164.084	C10H12O2	[M+H]+	Isoeugenol	Phenolic acids	Phenolic acids
mws0921	149.06	150.068	C9H10O2	[M-H]-	p-Coumaryl alcohol	Phenolic acids	Phenolic acids
mws1024	147.05	148.052	C9H8O2	[M-H]-	p-Coumaraldehyde	Phenolic acids	Phenolic acids
mws1078	138.05	137.048	C7H7NO2	[M+H]+	Anthranilic Acid	Phenolic acids	Phenolic acids
mws1195	179.07	178.063	C10H10O3	[M+H]+	Methyl p-coumarate	Phenolic acids	Phenolic acids
mws1200	177.06	178.063	C10H10O3	[M-H]-	Trans-4-Hydroxycinnamic Acid Methyl Ester	Phenolic acids	Phenolic acids
mws1212	209.08	208.074	C11H12O4	[M+H]+	Methyl ferulate	Phenolic acids	Phenolic acids
mws1336	138.05	137.048	C7H7NO2	[M+H]+	4-Aminobenzoic acid	Phenolic acids	Phenolic acids
mws1350	181.05	182.058	C9H10O4	[M-H]-	Syringic Aldehyde	Phenolic acids	Phenolic acids
mws1354	193.05	194.058	C10H10O4	[M-H]-	Trans-ferulic acid	Phenolic acids	Phenolic acids
mws1503	133.06	132.058	C9H8O	[M+H]+	Cinnamaldehyde	Phenolic acids	Phenolic acids
mws1521	285.1	286.105	C13H18O7	[M-H]-	Salicin	Phenolic acids	Phenolic acids
mws1584	515.12	516.127	C25H24O12	[M-H]-	Cynarin	Phenolic acids	Phenolic acids
mws2108	353.09	354.095	C16H18O9	[M-H]-	Cryptochlorogenic acid	Phenolic acids	Phenolic acids
mws2212	179.03	180.042	C9H8O4	[M-H]-	Caffeic acid	Phenolic acids	Phenolic acids
mws2213	147.05	148.052	C9H8O2	[M-H]-	Cinnamic acid	Phenolic acids	Phenolic acids
mws4085	223.06	224.068	C11H12O5	[M-H]-	Sinapic acid	Phenolic acids	Phenolic acids
pmb0423	193.05	194.058	C10H10O4	[M-H]-	Hydroxy-methoxycinnamate	Phenolic acids	Phenolic acids
pmb0752	369.12	368.111	C17H20O9	[M+H]+	3-O-Feruloyl quinic acid	Phenolic acids	Phenolic acids
pmb2620	207.07	208.074	C11H12O4	[M-H]-	3,4-Dimethoxycinnamic acid	Phenolic acids	Phenolic acids
pmb2871	315.07	316.079	C13H16O9	[M-H]-	2,5-Dihydroxy benzoic acid O-hexside	Phenolic acids	Phenolic acids
pmb2936	591.17	592.179	C28H32O14	[M-H]-	Disinapoyl hexoside	Phenolic acids	Phenolic acids
pmb2940	385.11	386.121	C17H22O10	[M-H]-	1-O-β-D-Glucopyranosyl sinapate	Phenolic acids	Phenolic acids
pmb3068	337.09	338.1	C16H18O8	[M-H]-	1-O-p-Coumaroyl quinic acid	Phenolic acids	Phenolic acids
pmb3072	481.14	482.142	C22H26O12	[M-H]-	3-O-p-coumaroyl shikimic acid O-hexoside	Phenolic acids	Phenolic acids
pmb3074	337.09	338.1	C16H18O8	[M-H]-	3-O-p-Coumaroyl quinic acid	Phenolic acids	Phenolic acids
pmb3107	359.1	360.106	C15H20O10	[M-H]-	Syringic acid O-glucoside	Phenolic acids	Phenolic acids
pme0241	123.04	122.037	C7H6O2	[M+H]+	Benzoic acid	Phenolic acids	Phenolic acids
pme0281	165.02	166.027	C8H6O4	[M-H]-	Terephthalic acid	Phenolic acids	Phenolic acids
pme1439	165.05	164.047	C9H8O3	[M+H]+	p-Coumaric acid	Phenolic acids	Phenolic acids
pme1816	353.09	354.095	C16H18O9	[M-H]-	Neochlorogenic acid(5-O-Caffeoylquinic acid)	Phenolic acids	Phenolic acids
pme3437	213.08	212.068	C10H12O5	[M+H]+	Eudesmic acid(3,4,5-trimethoxybenzoic acid)	Phenolic acids	Phenolic acids
pme3443	207.07	208.074	C11H12O4	[M-H]-	Sinapinaldehyde	Phenolic acids	Phenolic acids
pmf0424	517.13	516.127	C25H24O12	[M+H]+	Isochlorogenic acid B	Phenolic acids	Phenolic acids
pmf0440	163.08	162.068	C10H10O2	[M+H]+	4-MethoxycinnaMaldehyde	Phenolic acids	Phenolic acids
pmn001318	383.11	384.121	C21H20O7	[M-H]-	1,3-O-Di-p-Coumaroyl glycerol	Phenolic acids	Phenolic acids
pmn001319	413.12	414.131	C22H22O8	[M-H]-	1-O-Feruloyl-3-O-p-Coumaroyl glycerol	Phenolic acids	Phenolic acids
pmn001320	237.08	238.084	C12H14O5	[M-H]-	1-O-p-Cumaroylglycerol	Phenolic acids	Phenolic acids
pmn001367	315.07	316.079	C13H16O9	[M-H]-	Protocatechuic acid-4-glucoside	Phenolic acids	Phenolic acids
pmn001419	325.09	326.1	C15H18O8	[M-H]-	1-O-[(E)-p-Cumaroyl]-β-D-glucopyranose	Phenolic acids	Phenolic acids
pmn001420	341.09	342.095	C15H18O9	[M-H]-	1-O-[(E)-Caffeoyl]-β-D-glucopyranose	Phenolic acids	Phenolic acids
pmn001511	285.1	286.105	C13H18O7	[M-H]-	3-Hydroxy-5-Methylphenol-1-Oxy-β-D-Glucose	Phenolic acids	Phenolic acids
pmn001517	329.12	330.131	C15H22O8	[M-H]-	3,4,5-Trimethoxyphenyl-β-D-Glucopyranoside	Phenolic acids	Phenolic acids
pmn001523	473.04	474.043	C21H14O13	[M-H]-	1,3-Trigallic acid	Phenolic acids	Phenolic acids
pmn001612	753.22	754.232	C34H42O19	[M-H]-	β-D-(3-Mustard acyl)-fructosyl-α-D-(6-mustard acyl)glucoside	Phenolic acids	Phenolic acids
pmn001669	237.08	238.084	C12H14O5	[M-H]-	Methyl sinapate	Phenolic acids	Phenolic acids
pmn001671	547.17	548.174	C23H32O15	[M-H]-	β-D-Furanofructosyl-α-D-(6-mustard acyl)glucoside	Phenolic acids	Phenolic acids
pmn001672	547.17	548.174	C23H32O15	[M-H]-	β-D-Furanofructosyl-α-D-(3-mustard acyl)glucoside	Phenolic acids	Phenolic acids
pmn001682	179.03	180.042	C9H8O4	[M-H]-	Sorbic acid	Phenolic acids	Phenolic acids
pmn001695	371.1	372.106	C16H20O10	[M-H]-	Trihydroxycinnamoylquinic acid	Phenolic acids	Phenolic acids
pmn001710	521.13	522.137	C24H26O13	[M-H]-	Rosmarinyl Glucoside	Phenolic acids	Phenolic acids
pmn001714	655.3	328.133	C16H24O7	[2M-H]-	3-Hydroxy-4-isopropylbenzylalchol 3-glucoside	Phenolic acids	Phenolic acids
pmn001738	403.12	404.132	C17H24O11	[M-H]-	Oleoside 11-methyl ester	Phenolic acids	Phenolic acids
pmp000086	269.1	268.095	C13H16O6	[M+H]+	1-Feruloyl-sn-glycerol	Phenolic acids	Phenolic acids
pmp000091	445.15	444.142	C23H24O9	[M+H]+	Glyceryl 1,3-diferulate	Phenolic acids	Phenolic acids
pmp000232	339.11	338.1	C16H18O8	[M+H]+	Cis-3-p-coumaric quinic acid	Phenolic acids	Phenolic acids
pmp001086	127.04	126.032	C6H6O3	[M+H]+	5-Hydroxymethylfurfural	Phenolic acids	Phenolic acids
pmp001285	149.02	148.016	C8H4O3	[M+H]+	Phthalic anhydride	Phenolic acids	Phenolic acids
mws0248	243.06	244.07	C9H12N2O6	[M-H]-	Uridine	Nucleotides and derivatives	Nucleotides and derivatives
mws0255	112.05	111.043	C4H5N3O	[M+H]+	Cytosine	Nucleotides and derivatives	Nucleotides and derivatives
mws0572	126.07	125.059	C5H7N3O	[M+H]+	5-Methylcytosine	Nucleotides and derivatives	Nucleotides and derivatives
mws0609	344.04	345.047	C10H12N5O7P	[M-H]-	Guanosine 3',5'-cyclic monophosphate	Nucleotides and derivatives	Nucleotides and derivatives
mws0668	283.07	284.076	C10H12N4O6	[M-H]-	Xanthosine	Nucleotides and derivatives	Nucleotides and derivatives
mws0675	335.06	334.057	C11H15N2O8P	[M+H]+	β-Nicotinamide mononucleotide	Nucleotides and derivatives	Nucleotides and derivatives
mws0847	150.08	149.07	C6H7N5	[M+H]+	1-Methyladenine	Nucleotides and derivatives	Nucleotides and derivatives
mws0884	328.05	329.053	C10H12N5O6P	[M-H]-	Cyclic AMP	Nucleotides and derivatives	Nucleotides and derivatives
mws1060	267.07	268.081	C10H12N4O5	[M-H]-	9-(β-D-Arabinofuranosyl)hypoxanthine	Nucleotides and derivatives	Nucleotides and derivatives
pmb0981	348.07	347.063	C10H14N5O7P	[M+H]+	Adenosine 5'-monophosphate	Nucleotides and derivatives	Nucleotides and derivatives
pmb0998	364.07	363.058	C10H14N5O8P	[M+H]+	Guanosine 5'-monophosphate	Nucleotides and derivatives	Nucleotides and derivatives
pmb2922	565.05	566.055	C15H24N2O17P2	[M-H]-	Uridine 5'-diphospho-D-glucose	Nucleotides and derivatives	Nucleotides and derivatives
pme0033	137.05	136.039	C5H4N4O	[M+H]+	Hypoxanthine	Nucleotides and derivatives	Nucleotides and derivatives
pme0040	136.06	135.054	C5H5N5	[M+H]+	Adenine	Nucleotides and derivatives	Nucleotides and derivatives
pme0183	152.06	151.049	C5H5N5O	[M+H]+	2-Hydroxy-6-aminopurine	Nucleotides and derivatives	Nucleotides and derivatives
pme0230	268.1	267.097	C10H13N5O4	[M+H]+	Adenosine	Nucleotides and derivatives	Nucleotides and derivatives
pme0264	243.1	242.09	C10H14N2O5	[M+H]+	Thymidine	Nucleotides and derivatives	Nucleotides and derivatives
pme1109	152.06	151.049	C5H5N5O	[M+H]+	Guanine	Nucleotides and derivatives	Nucleotides and derivatives
pme1173	137.05	136.039	C5H4N4O	[M+H]+	Allopurinol	Nucleotides and derivatives	Nucleotides and derivatives
pme1178	284.1	283.092	C10H13N5O5	[M+H]+	Guanosine	Nucleotides and derivatives	Nucleotides and derivatives
pme1194	228.1	227.091	C9H13N3O4	[M+H]+	Deoxycytidine	Nucleotides and derivatives	Nucleotides and derivatives
pme1474	298.1	297.09	C11H15N5O3S	[M+H]+	5'-Deoxy-5'-(methylthio)adenosine	Nucleotides and derivatives	Nucleotides and derivatives
pme2746	784.15	785.157	C27H33N9O15P2	[M-H]-	Flavin adenine dinucleotide(FAD)	Nucleotides and derivatives	Nucleotides and derivatives
pme3007	402.99	404.002	C9H14N2O12P2	[M-H]-	Uridine 5'-diphosphate	Nucleotides and derivatives	Nucleotides and derivatives
pme3174	324.06	323.052	C9H14N3O8P	[M+H]+	Cytidine 5'-monophosphate(Cytidylic acid)	Nucleotides and derivatives	Nucleotides and derivatives
pme3184	332.08	331.068	C10H14N5O6P	[M+H]+	2'-Deoxyadenosine-5'-monophosphate	Nucleotides and derivatives	Nucleotides and derivatives
pme3188	323.03	324.036	C9H13N2O9P	[M-H]-	Uridine 5'-monophosphate	Nucleotides and derivatives	Nucleotides and derivatives
pme3337	384.12	383.108	C14H17N5O8	[M+H]+	N6-Succinyl Adenosine	Nucleotides and derivatives	Nucleotides and derivatives
pme3732	244.09	243.086	C9H13N3O5	[M+H]+	Cytidine	Nucleotides and derivatives	Nucleotides and derivatives
pme3967	312.13	311.123	C12H17N5O5	[M+H]+	2-(Dimethylamino)guanosine	Nucleotides and derivatives	Nucleotides and derivatives
pme3968	166.07	165.065	C6H7N5O	[M+H]+	7-Methylguanine	Nucleotides and derivatives	Nucleotides and derivatives
Lmyn000239	181.07	182.079	C6H14O6	[M-H]-	Cordycepic acid	Others	Saccharides and Alcohols
mws0213	151.06	152.068	C5H12O5	[M-H]-	Ribitol	Others	Saccharides and Alcohols
mws0214	181.07	182.079	C6H14O6	[M-H]-	D-Sorbitol	Others	Saccharides and Alcohols
mws0264	341.11	342.116	C12H22O11	[M-H]-	D-(+)-TrehaloseAnhydrous	Others	Saccharides and Alcohols
mws0866	259.02	260.03	C6H13O9P	[M-H]-	D-Glucose 6-phosphate	Others	Saccharides and Alcohols
mws1080	341.11	342.116	C12H22O11	[M-H]-	Galactinol	Others	Saccharides and Alcohols
mws1090	259.02	260.03	C6H13O9P	[M-H]-	Glucose-1-phosphate	Others	Saccharides and Alcohols
mws1208	175.17	174.162	C10H22O2	[M+H]+	1,10-Decanediol	Others	Saccharides and Alcohols
mws1333	341.11	342.116	C12H22O11	[M-H]-	Melibiose	Others	Saccharides and Alcohols
mws1499	149.05	150.053	C5H10O5	[M-H]-	D-(-)-Arabinose	Others	Saccharides and Alcohols
mws1589	503.16	504.169	C18H32O16	[M-H]-	Panose	Others	Saccharides and Alcohols
mws2523	421.08	422.083	C12H23O14P	[M-H]-	Trehalose 6-phosphate	Others	Saccharides and Alcohols
mws4170	179.06	180.063	C6H12O6	[M-H]-	D-Glucose	Others	Saccharides and Alcohols
mws5038	341.11	342.116	C12H22O11	[M-H]-	Isomaltulose	Others	Saccharides and Alcohols
pmb3081	289	290.004	C6H11PO11	[M-H]-	Glucarate O-Phosphoric acid	Others	Saccharides and Alcohols
pme0500	503.16	504.169	C18H32O16	[M-H]-	D-(+)-Melezitose	Others	Saccharides and Alcohols
pme0516	179.06	180.063	C6H12O6	[M-H]-	Inositol	Others	Saccharides and Alcohols
pme0519	341.11	342.116	C12H22O11	[M-H]-	D-(+)-Sucrose	Others	Saccharides and Alcohols
pme0534	195.05	196.058	C6H12O7	[M-H]-	Gluconic acid	Others	Saccharides and Alcohols
pme1261	206.14	205.131	C9H19NO4	[M+H]+	Pantothenol	Others	Saccharides and Alcohols
pme2237	181.07	182.079	C6H14O6	[M-H]-	Dulcitol	Others	Saccharides and Alcohols
pme2253	177.04	178.048	C6H10O6	[M-H]-	L-Gulonic-γ-lactone	Others	Saccharides and Alcohols
pme3705	193.04	194.043	C6H10O7	[M-H]-	D-Glucoronic acid	Others	Saccharides and Alcohols
pmn001588	665.21	666.222	C24H42O21	[M-H]-	Nystose	Others	Saccharides and Alcohols
mws0177	111.01	112.016	C5H4O3	[M-H]-	2-Furanoic acid	Organic acids	Organic acids
mws0192	117.02	118.027	C4H6O4	[M-H]-	Succinic acid	Organic acids	Organic acids
mws0208	145.05	146.058	C6H10O4	[M-H]-	Adipic Acid	Organic acids	Organic acids
mws0237	187.1	188.105	C9H16O4	[M-H]-	Anchoic Acid	Organic acids	Organic acids
mws0242	173.08	174.089	C8H14O4	[M-H]-	SubericAcid	Organic acids	Organic acids
mws0275	133.01	134.022	C4H6O5	[M-H]-	L-(-)-Malic acid	Organic acids	Organic acids
mws0277	191.06	192.063	C7H12O6	[M-H]-	Kinic acid	Organic acids	Organic acids
mws0281	191.02	192.027	C6H8O7	[M-H]-	Citric Acid	Organic acids	Organic acids
mws0344	165.04	166.048	C5H10O6	[M-H]-	D-Xylonic acid	Organic acids	Organic acids
mws0376	115	116.011	C4H4O4	[M-H]-	Fumaric acid	Organic acids	Organic acids
mws0425	129.02	130.027	C5H6O4	[M-H]-	Citraconic acid	Organic acids	Organic acids
mws0470	117.02	118.027	C4H6O4	[M-H]-	Methylmalonic acid	Organic acids	Organic acids
mws0473	131.03	132.042	C5H8O4	[M-H]-	2-Methylsuccinic acid	Organic acids	Organic acids
mws0567	146.09	145.085	C5H11N3O2	[M+H]+	4-Guanidinobutyric acid	Organic acids	Organic acids
mws0596	154.05	153.043	C7H7NO3	[M+H]+	3-Hydroxyanthranilic acid	Organic acids	Organic acids
mws0671	120.07	119.058	C4H9NO3	[M+H]+	L-Homoserine	Organic acids	Organic acids
mws0924	145.05	146.058	C6H10O4	[M-H]-	2-Methylglutaric acid	Organic acids	Organic acids
mws0972	131.07	132.079	C6H12O3	[M-H]-	5-Hydroxyhexanoic acid	Organic acids	Organic acids
mws1213	193.04	194.043	C6H10O7	[M-H]-	Aldehydo-D-galacturonate	Organic acids	Organic acids
mws2125	166.98	205.938	C3H4KO6P	[M-K]-	Phosphoenolpyruvic acid	Organic acids	Organic acids
pmb3099	153.03	154.039	C4H11O4P	[M-H]-	Diethyl phosphate	Organic acids	Organic acids
pme0274	132.1	131.095	C6H13NO2	[M+H]+	6-Aminocaproic acid	Organic acids	Organic acids
pme0282	165.02	166.027	C8H6O4	[M-H]-	Phthalic acid	Organic acids	Organic acids
pme0295	146.08	145.074	C6H11NO3	[M+H]+	4-Acetamidobutyric acid	Organic acids	Organic acids
pme2049	103.04	104.047	C4H8O3	[M-H]-	2-Hydroxybutanoic acid	Organic acids	Organic acids
pme3009	175.02	174.016	C6H6O6	[M+H]+	Trans-Citridic acid	Organic acids	Organic acids
pme3011	104.07	103.063	C4H9NO2	[M+H]+	γ-Aminobutyric acid	Organic acids	Organic acids
pme3154	147.07	148.074	C6H12O4	[M-H]-	(Rs)-Mevalonic acid	Organic acids	Organic acids
Hmqp006235	516.3	515.297	C21H46N3O9P	[M+H]+	LysoPC 18:4	Lipids	LPC
Qingke_Rfmb087-1-1	311.22	312.23	C18H32O4	[M-H]-	13-Oxo-9-hydroxy-10-octadecenoic acid	Lipids	Free fatty acids
Qingke_Rfmb089-2-3	313.24	314.246	C18H34O4	[M-H]-	9,10-Dihydroxy-12-octadecenoic acid	Lipids	Free fatty acids
Qingke_Rfmb090-1-3	295.23	296.235	C18H32O3	[M-H]-	13-Hydroxy-9,11-octadecadienoic acid	Lipids	Free fatty acids
Qingke_Rfmb091-1-1	295.23	296.235	C18H32O3	[M-H]-	9-Hydroxy-10,12-octadecadienoic acid	Lipids	Free fatty acids
YC512117	277.22	276.209	C18H28O2	[M+H]+	Octadecatetraenoic acid	Lipids	Free fatty acids
mws0119	227.2	228.209	C14H28O2	[M-H]-	Myristic Acid	Lipids	Free fatty acids
mws0120	258.11	257.103	C8H20NO6P	[M+H]+	Choline alfoscerate	Lipids	PC
mws0126	524.37	523.364	C26H54NO7P	[M+H]+	LysoPC 18:0	Lipids	LPC
mws0289	480.31	479.301	C23H46NO7P	[M+H]+	LysoPE 18:1	Lipids	LPE
mws0366	277.22	278.225	C18H30O2	[M-H]-	γ-Linolenic Acid	Lipids	Free fatty acids
mws0396	281.25	282.256	C18H34O2	[M-H]-	Elaidic Acid	Lipids	Free fatty acids
mws0752	185.15	186.162	C11H22O2	[M-H]-	Undecylic Acid	Lipids	Free fatty acids
mws1490	281.25	282.256	C18H34O2	[M-H]-	Oleic Acid	Lipids	Free fatty acids
mws2623	281.25	282.256	C18H34O2	[M-H]-	11-Octadecanoic acid(Vaccenic acid)	Lipids	Free fatty acids
mws5045	215.17	216.173	C12H24O3	[M-H]-	12-Hydroxydodecanoic acid	Lipids	Free fatty acids
pmb0164	355.28	354.277	C21H38O4	[M+H]+	MAG(18:2)isomer1	Lipids	Glycerol ester
pmb0296	357.3	356.293	C21H40O4	[M+H]+	MAG(18:1)isomer2	Lipids	Glycerol ester
pmb0767	302.31	301.298	C18H39NO2	[M+H]+	D-erythro-Dihydrosphingosine	Lipids	Sphingolipids
pmb0854	518.32	517.317	C26H48NO7P	[M+H]+	LysoPC 18:3	Lipids	LPC
pmb0855	496.34	495.332	C24H50NO7P	[M+H]+	LysoPC 16:0	Lipids	LPC
pmb0856	480.31	479.301	C23H46NO7P	[M+H]+	LysoPE 18:1(2n isomer)	Lipids	LPE
pmb0864	426.26	425.254	C19H40NO7P	[M+H]+	LysoPE 14:0	Lipids	LPE
pmb0865	518.32	517.317	C26H48NO7P	[M+H]+	LysoPC 18:3(2n isomer)	Lipids	LPC
pmb0874	478.29	477.286	C23H44NO7P	[M+H]+	LysoPE 18:2(2n isomer)	Lipids	LPE
pmb0876	454.29	453.286	C21H44NO7P	[M+H]+	LysoPE 16:0	Lipids	LPE
pmb0889	279.23	278.225	C18H30O2	[M+H]+	Punicic acid	Lipids	Free fatty acids
pmb0890	355.28	354.277	C21H38O4	[M+H]+	MAG(18:2)	Lipids	Glycerol ester
pmb2221	318.3	317.293	C18H39NO3	[M+H]+	4-Hydroxysphinganine	Lipids	Sphingolipids
pmb2319	482.32	481.317	C23H48NO7P	[M+H]+	LysoPC 15:0	Lipids	LPC
pmb2363	357.3	356.293	C21H40O4	[M+H]+	MAG(18:1)isomer1	Lipids	Glycerol ester
pmb2444	353.27	352.261	C21H36O4	[M+H]+	MAG(18:3)isomer1	Lipids	Glycerol ester
pmb2778	295.23	296.235	C18H32O3	[M-H]-	9,10-EODE	Lipids	Free fatty acids
pmb2786	293.21	294.219	C18H30O3	[M-H]-	9-HOTrE	Lipids	Free fatty acids
pmb2787	293.21	294.219	C18H30O3	[M-H]-	9-KODE	Lipids	Free fatty acids
pmb2792	293.21	294.219	C18H30O3	[M-H]-	13-HOTrE(r)	Lipids	Free fatty acids
pmb2799	295.23	296.235	C18H32O3	[M-H]-	12,13-EODE	Lipids	Free fatty acids
pmd0130	468.31	467.301	C22H46NO7P	[M+H]+	LysoPC 14:0(2n isomer)	Lipids	LPC
pmd0132	496.34	495.332	C24H50NO7P	[M+H]+	LysoPC 16:0(2n isomer)	Lipids	LPC
pmd0136	524.37	523.364	C26H54NO7P	[M+H]+	LysoPC 18:0(2n isomer)	Lipids	LPC
pmd0160	454.29	453.286	C21H44NO7P	[M+H]+	LysoPE 16:0(2n isomer)	Lipids	LPE
pmn001495	329.27	330.277	C19H38O4	[M-H]-	Hexadecanoic acid 2,3-dihydroxypropyl ester	Lipids	Glycerol ester
pmn001578	255.23	256.24	C16H32O2	[M-H]-	Hexadecanoic acid	Lipids	Free fatty acids
pmn001688	295.23	296.235	C18H32O3	[M-H]-	9S-Hyroxy-10E,12E-octadecadienoic acid	Lipids	Free fatty acids
pmn001691	327.22	328.225	C18H32O5	[M-H]-	9,12,13-Trihyroxy-10,15-octadecadienoic acid	Lipids	Free fatty acids
pmn001694	329.23	330.241	C18H34O5	[M-H]-	9,10,13-Trihyroxy-11-octadecadienoic acid	Lipids	Free fatty acids
pmp001251	520.34	519.332	C26H50NO7P	[M+H]+	LysoPC 18:2(isomer)	Lipids	LPC
pmp001264	274.27	273.267	C16H35NO2	[M+H]+	Hexadecylsphingosine	Lipids	Sphingolipids
pmp001270	494.32	493.317	C24H48NO7P	[M+H]+	LysoPC 16:1	Lipids	LPC
pmp001273	520.34	519.332	C26H50NO7P	[M+H]+	LysoPC 18:2	Lipids	LPC
pmp001281	522.36	521.348	C26H52NO7P	[M+H]+	LysoPC 18:1	Lipids	LPC
pmp001283	355.28	354.277	C21H38O4	[M+H]+	Glyceryl linoleate	Lipids	Glycerol ester
Hmfn00531	175.02	176.032	C6H8O6	[M-H]-	L-Ascorbic acid	Others	Vitamin
mws0133	123.06	122.048	C6H6N2O	[M+H]+	Nicotinamide	Others	Vitamin
mws0232	377.15	376.138	C17H20N4O6	[M+H]+	Riboflavin	Others	Vitamin
mws1337	220.12	219.111	C9H17NO5	[M+H]+	D-Pantothenic Acid	Others	Vitamin
pmb0801	346.11	345.106	C14H19NO9	[M+H]+	4-Pyridoxic acid O-hexoside	Others	Vitamin
pme1306	250.05	249.04	C8H12NO6P	[M+H]+	Pyridoxine 5'-phosphate	Others	Vitamin
pme1383	170.08	169.074	C8H11NO3	[M+H]+	Pyridoxine	Others	Vitamin
pme2596	184.06	183.053	C8H9NO4	[M+H]+	4-Pyridoxic acid	Others	Vitamin
