# Supplementary material for: Metabolomic and transcriptomic analyses reveal the mechanism of sweet-acidic taste formation during pineapple fruit development
Source: Front Plant Sci. 2022 Sep 8;13:971506. doi: 10.3389/fpls.2022.971506 (PMC9493369; doi:10.3389/fpls.2022.971506)
Supplement: Supplementary file 2 [file Table_2.XLSX]

## Sheet: 56 amino acids and derivatives
Index	Q1 (Da)	Molecular Weight (Da)	Formula	Ionization model	Compounds	Class I	Class II
Qingke_Rfmb319-1-2	130.09	129.079	C6H11NO2	[M+H]+	Pipecolic acid	Amino acids and derivatives	Amino acids and derivatives
Qingke_Rfmb320-1-3	144.1	143.095	C7H13NO2	[M+H]+	1,2-N-Methylpipecolic acid	Amino acids and derivatives	Amino acids and derivatives
mws0001	133.06	132.054	C4H8N2O3	[M+H]+	L-Asparagine Anhydrous	Amino acids and derivatives	Amino acids and derivatives
mws0193	190.12	189.111	C7H15N3O3	[M+H]+	L-Homocitrulline	Amino acids and derivatives	Amino acids and derivatives
mws0216	132.07	131.058	C5H9NO3	[M+H]+	Trans-4-Hydroxy-L-proline	Amino acids and derivatives	Amino acids and derivatives
mws0219	132.03	133.038	C4H7NO4	[M-H]-	L-AsparticAcid	Amino acids and derivatives	Amino acids and derivatives
mws0227	132.1	131.095	C6H13NO2	[M+H]+	L-Leucine	Amino acids and derivatives	Amino acids and derivatives
mws0230	120.07	119.058	C4H9NO3	[M+H]+	L-(-)-Threonine	Amino acids and derivatives	Amino acids and derivatives
mws0250	182.08	181.074	C9H11NO3	[M+H]+	L-(-)-Tyrosine	Amino acids and derivatives	Amino acids and derivatives
mws0254	156.08	155.069	C6H9N3O2	[M+H]+	L-Histidine	Amino acids and derivatives	Amino acids and derivatives
mws0256	118.09	117.079	C5H11NO2	[M+H]+	L-Valine	Amino acids and derivatives	Amino acids and derivatives
mws0258	132.1	131.095	C6H13NO2	[M+H]+	L-Isoleucine	Amino acids and derivatives	Amino acids and derivatives
mws0260	175.12	174.112	C6H14N4O2	[M+H]+	L-(+)-Arginine	Amino acids and derivatives	Amino acids and derivatives
mws0279	170.09	169.085	C7H11N3O2	[M+H]+	3-N-Methyl-L-histidine	Amino acids and derivatives	Amino acids and derivatives
mws0282	203.08	204.09	C11H12N2O2	[M-H]-	L-Tryptophan	Amino acids and derivatives	Amino acids and derivatives
mws0582	322.11	321.099	C11H19N3O6S	[M+H]+	S-(methyl)glutathione	Amino acids and derivatives	Amino acids and derivatives
mws0629	281.11	280.106	C13H16N2O5	[M+H]+	Asp-phe	Amino acids and derivatives	Amino acids and derivatives
mws0636	313.15	312.147	C18H20N2O3	[M+H]+	Phe-Phe	Amino acids and derivatives	Amino acids and derivatives
mws0736	189.12	188.116	C8H16N2O3	[M+H]+	N-Glycyl-L-leucine	Amino acids and derivatives	Amino acids and derivatives
mws0890	104.04	105.043	C3H7NO3	[M-H]-	L-Serine	Amino acids and derivatives	Amino acids and derivatives
mws0923	200.05	199.04	C9H10ClNO2	[M+H]+	L-2-chlorophenylalanine	Amino acids and derivatives	Amino acids and derivatives
mws1050	148.06	147.053	C5H9NO4	[M+H]+	O-Acetylserine	Amino acids and derivatives	Amino acids and derivatives
mws1587	132.1	131.095	C6H13NO2	[M+H]+	α-Aminocaproic acid	Amino acids and derivatives	Amino acids and derivatives
mws4134	611.14	612.152	C20H32N6O12S2	[M-H]-	Oxidized Glutathione	Amino acids and derivatives	Amino acids and derivatives
mws4176	237.12	236.116	C12H16N2O3	[M+H]+	Alanylphenylalanine	Amino acids and derivatives	Amino acids and derivatives
mws5035	279.17	278.163	C15H22N2O3	[M+H]+	Leucylphenylalanine	Amino acids and derivatives	Amino acids and derivatives
mws5037	203.14	202.132	C9H18N2O3	[M+H]+	Alanylleucine	Amino acids and derivatives	Amino acids and derivatives
mws5041	189.12	188.116	C8H16N2O3	[M+H]+	Glycylisoleucine	Amino acids and derivatives	Amino acids and derivatives
mws5042	223.11	222.1	C11H14N2O3	[M+H]+	Glycylphenylalanine	Amino acids and derivatives	Amino acids and derivatives
pmb2591	245.09	246.1	C13H14N2O3	[M-H]-	Acetyltryptophan	Amino acids and derivatives	Amino acids and derivatives
pme0006	116.07	115.063	C5H9NO2	[M+H]+	L-Proline	Amino acids and derivatives	Amino acids and derivatives
pme0008	176.1	175.096	C6H13N3O3	[M+H]+	L-Citrulline	Amino acids and derivatives	Amino acids and derivatives
pme0014	148.06	147.053	C5H9NO4	[M+H]+	L-Glutamic acid	Amino acids and derivatives	Amino acids and derivatives
pme0021	166.09	165.07	C9H11NO2	[M+H]+	L-Phenylalanine	Amino acids and derivatives	Amino acids and derivatives
pme0026	147.11	146.106	C6H14N2O2	[M+H]+	L-(+)-Lysine	Amino acids and derivatives	Amino acids and derivatives
pme0122	189.12	188.116	C8H16N2O3	[M+H]+	N6-Acetyl-L-lysine	Amino acids and derivatives	Amino acids and derivatives
pme0128	159.08	160.085	C6H12N2O3	[M-H]-	AlanylAlanine	Amino acids and derivatives	Amino acids and derivatives
pme0137	187.07	188.08	C7H12N2O4	[M-H]-	N-α-Acetyl-L-glutamine	Amino acids and derivatives	Amino acids and derivatives
pme0170	217.13	216.122	C8H16N4O3	[M+H]+	N-α-Acetyl-L-arginine	Amino acids and derivatives	Amino acids and derivatives
pme0181	170.09	169.085	C7H11N3O2	[M+H]+	1-Methylhistidine	Amino acids and derivatives	Amino acids and derivatives
pme0193	147.08	146.069	C5H10N2O3	[M+H]+	L-Glutamine	Amino acids and derivatives	Amino acids and derivatives
pme0253	174.11	173.105	C8H15NO3	[M+H]+	N-Acetyl-L-leucine	Amino acids and derivatives	Amino acids and derivatives
pme0278	191.1	190.095	C7H14N2O4	[M+H]+	2,6-Diaminooimelic acid	Amino acids and derivatives	Amino acids and derivatives
pme1002	138.09	137.084	C8H11NO	[M+H]+	L-Tyramine	Amino acids and derivatives	Amino acids and derivatives
pme1086	306.08	307.084	C10H17N3O6S	[M-H]-	Glutathione reduced form	Amino acids and derivatives	Amino acids and derivatives
pme1210	150.06	149.051	C5H11NO2S	[M+H]+	L-Methionine	Amino acids and derivatives	Amino acids and derivatives
pme1228	221.09	220.085	C11H12N2O3	[M+H]+	5-Hydroxy-L-tryptophan	Amino acids and derivatives	Amino acids and derivatives
pme1286	385.13	384.122	C14H20N6O5S	[M+H]+	S-(5'-Adenosy)-L-homocysteine	Amino acids and derivatives	Amino acids and derivatives
pme1419	164.07	199.043	C6H14ClNO2S	[M-Cl]+	L-Methionine methyl ester	Amino acids and derivatives	Amino acids and derivatives
pme2122	112.09	111.08	C5H9N3	[M+H]+	Histamine	Amino acids and derivatives	Amino acids and derivatives
pme2743	194.08	193.074	C10H11NO3	[M+H]+	N-Phenylacetylglycine	Amino acids and derivatives	Amino acids and derivatives
pme2890	269.06	268.055	C8H16N2O4S2	[M+H]+	L-Homocystine	Amino acids and derivatives	Amino acids and derivatives
pme3017	104.07	103.063	C4H9NO2	[M+H]+	2-Aminoisobutyric acid	Amino acids and derivatives	Amino acids and derivatives
pme3033	104.07	103.063	C4H9NO2	[M+H]+	N,N-Dimethylglycine	Amino acids and derivatives	Amino acids and derivatives
pme3388	189.13	188.127	C7H16N4O2	[M+H]+	H-HomoArg-OH	Amino acids and derivatives	Amino acids and derivatives
pme3827	198.08	197.069	C9H11NO4	[M+H]+	3,4-Dihydroxyphenylalanine	Amino acids and derivatives	Amino acids and derivatives

## Sheet: 81 phenolic acids
Index	Q1 (Da)	Molecular Weight (Da)	Formula	Ionization model	Compounds	Class I	Class II
Huasheng_mad1424	427.05	426.043	C17H14O13	[M+H]+	Ditartaroyl-hydroxylcoumarin	Phenolic acids	Phenolic acids
Lmhn002573	399.09	400.101	C17H20O11	[M-H]-	Sinapoylglucuronic acid	Phenolic acids	Phenolic acids
Lmhn002926	279.05	280.058	C13H12O7	[M-H]-	p-Coumaroylmalic acid	Phenolic acids	Phenolic acids
Lmhn003074	309.06	310.069	C14H14O8	[M-H]-	Feruloylmalic acid	Phenolic acids	Phenolic acids
Lmhn003240	237.04	238.048	C11H10O6	[M-H]-	Benzoylmalic acid	Phenolic acids	Phenolic acids
Lmnp001551	167.07	166.063	C9H10O3	[M+H]+	3-Methoxy-4-hydroxy-acetophenone	Phenolic acids	Phenolic acids
Lmtn002565	329.11	330.095	C14H18O9	[M-H]-	1'-O-Vanilloyl-β-D-glucoside	Phenolic acids	Phenolic acids
Zmhn001883	329.09	330.095	C14H18O9	[M-H]-	Vanillic acid glycoside	Phenolic acids	Phenolic acids
Zmhn001926	299.08	300.084	C13H16O8	[M-H]-	Salicylic acid O-glycoside	Phenolic acids	Phenolic acids
Zmhn002227	385.11	386.121	C17H22O10	[M-H]-	Sinapic acid-glycoside	Phenolic acids	Phenolic acids
Zmhn002242	341.09	342.095	C15H18O9	[M-H]-	Caffeoyl glucose	Phenolic acids	Phenolic acids
Zmhn002301	325.09	326.1	C15H18O8	[M-H]-	p-Coumaric acid-O-glycoside	Phenolic acids	Phenolic acids
Zmhn002422	355.1	356.11	C16H20O9	[M-H]-	Feruloyl glucose	Phenolic acids	Phenolic acids
Zmhn002513	385.11	386.121	C17H22O10	[M-H]-	Isosinapic acid-hexoside	Phenolic acids	Phenolic acids
Zmxn001997	299.08	300.084	C13H16O8	[M-H]-	Isosalicylic acid O-glycoside	Phenolic acids	Phenolic acids
mws0014	193.05	194.058	C10H10O4	[M-H]-	Ferulic acid	Phenolic acids	Phenolic acids
mws0027	197.05	198.053	C9H10O5	[M-H]-	Syringic acid	Phenolic acids	Phenolic acids
mws0028	167.03	168.042	C8H8O4	[M-H]-	Vanillic acid	Phenolic acids	Phenolic acids
mws0178	353.09	354.095	C16H18O9	[M-H]-	Chlorogenic acid	Phenolic acids	Phenolic acids
mws0179	367.1	368.111	C17H20O9	[M-H]-	Chlorogenic acid methyl ester	Phenolic acids	Phenolic acids
mws0458	151.04	152.047	C8H8O3	[M-H]-	Vanillin	Phenolic acids	Phenolic acids
mws0628	121.03	122.037	C7H6O2	[M-H]-	4-Hydroxybenzaldehyde	Phenolic acids	Phenolic acids
mws0853	209.08	210.089	C11H14O4	[M-H]-	Sinapyl alcohol	Phenolic acids	Phenolic acids
mws0898	165.09	164.084	C10H12O2	[M+H]+	Isoeugenol	Phenolic acids	Phenolic acids
mws0921	149.06	150.068	C9H10O2	[M-H]-	p-Coumaryl alcohol	Phenolic acids	Phenolic acids
mws1024	147.05	148.052	C9H8O2	[M-H]-	p-Coumaraldehyde	Phenolic acids	Phenolic acids
mws1078	138.05	137.048	C7H7NO2	[M+H]+	Anthranilic Acid	Phenolic acids	Phenolic acids
mws1195	179.07	178.063	C10H10O3	[M+H]+	Methyl p-coumarate	Phenolic acids	Phenolic acids
mws1200	177.06	178.063	C10H10O3	[M-H]-	Trans-4-Hydroxycinnamic Acid Methyl Ester	Phenolic acids	Phenolic acids
mws1212	209.08	208.074	C11H12O4	[M+H]+	Methyl ferulate	Phenolic acids	Phenolic acids
mws1336	138.05	137.048	C7H7NO2	[M+H]+	4-Aminobenzoic acid	Phenolic acids	Phenolic acids
mws1350	181.05	182.058	C9H10O4	[M-H]-	Syringic Aldehyde	Phenolic acids	Phenolic acids
mws1354	193.05	194.058	C10H10O4	[M-H]-	Trans-ferulic acid	Phenolic acids	Phenolic acids
mws1503	133.06	132.058	C9H8O	[M+H]+	Cinnamaldehyde	Phenolic acids	Phenolic acids
mws1521	285.1	286.105	C13H18O7	[M-H]-	Salicin	Phenolic acids	Phenolic acids
mws1584	515.12	516.127	C25H24O12	[M-H]-	Cynarin	Phenolic acids	Phenolic acids
mws2108	353.09	354.095	C16H18O9	[M-H]-	Cryptochlorogenic acid	Phenolic acids	Phenolic acids
mws2212	179.03	180.042	C9H8O4	[M-H]-	Caffeic acid	Phenolic acids	Phenolic acids
mws2213	147.05	148.052	C9H8O2	[M-H]-	Cinnamic acid	Phenolic acids	Phenolic acids
mws4085	223.06	224.068	C11H12O5	[M-H]-	Sinapic acid	Phenolic acids	Phenolic acids
pmb0423	193.05	194.058	C10H10O4	[M-H]-	Hydroxy-methoxycinnamate	Phenolic acids	Phenolic acids
pmb0752	369.12	368.111	C17H20O9	[M+H]+	3-O-Feruloyl quinic acid	Phenolic acids	Phenolic acids
pmb2620	207.07	208.074	C11H12O4	[M-H]-	3,4-Dimethoxycinnamic acid	Phenolic acids	Phenolic acids
pmb2871	315.07	316.079	C13H16O9	[M-H]-	2,5-Dihydroxy benzoic acid O-hexside	Phenolic acids	Phenolic acids
pmb2936	591.17	592.179	C28H32O14	[M-H]-	Disinapoyl hexoside	Phenolic acids	Phenolic acids
pmb2940	385.11	386.121	C17H22O10	[M-H]-	1-O-β-D-Glucopyranosyl sinapate	Phenolic acids	Phenolic acids
pmb3068	337.09	338.1	C16H18O8	[M-H]-	1-O-p-Coumaroyl quinic acid	Phenolic acids	Phenolic acids
pmb3072	481.14	482.142	C22H26O12	[M-H]-	3-O-p-coumaroyl shikimic acid O-hexoside	Phenolic acids	Phenolic acids
pmb3074	337.09	338.1	C16H18O8	[M-H]-	3-O-p-Coumaroyl quinic acid	Phenolic acids	Phenolic acids
pmb3107	359.1	360.106	C15H20O10	[M-H]-	Syringic acid O-glucoside	Phenolic acids	Phenolic acids
pme0241	123.04	122.037	C7H6O2	[M+H]+	Benzoic acid	Phenolic acids	Phenolic acids
pme0281	165.02	166.027	C8H6O4	[M-H]-	Terephthalic acid	Phenolic acids	Phenolic acids
pme1439	165.05	164.047	C9H8O3	[M+H]+	p-Coumaric acid	Phenolic acids	Phenolic acids
pme1816	353.09	354.095	C16H18O9	[M-H]-	Neochlorogenic acid(5-O-Caffeoylquinic acid)	Phenolic acids	Phenolic acids
pme3437	213.08	212.068	C10H12O5	[M+H]+	Eudesmic acid(3,4,5-trimethoxybenzoic acid)	Phenolic acids	Phenolic acids
pme3443	207.07	208.074	C11H12O4	[M-H]-	Sinapinaldehyde	Phenolic acids	Phenolic acids
pmf0424	517.13	516.127	C25H24O12	[M+H]+	Isochlorogenic acid B	Phenolic acids	Phenolic acids
pmf0440	163.08	162.068	C10H10O2	[M+H]+	4-MethoxycinnaMaldehyde	Phenolic acids	Phenolic acids
pmn001318	383.11	384.121	C21H20O7	[M-H]-	1,3-O-Di-p-Coumaroyl glycerol	Phenolic acids	Phenolic acids
pmn001319	413.12	414.131	C22H22O8	[M-H]-	1-O-Feruloyl-3-O-p-Coumaroyl glycerol	Phenolic acids	Phenolic acids
pmn001320	237.08	238.084	C12H14O5	[M-H]-	1-O-p-Cumaroylglycerol	Phenolic acids	Phenolic acids
pmn001367	315.07	316.079	C13H16O9	[M-H]-	Protocatechuic acid-4-glucoside	Phenolic acids	Phenolic acids
pmn001419	325.09	326.1	C15H18O8	[M-H]-	1-O-[(E)-p-Cumaroyl]-β-D-glucopyranose	Phenolic acids	Phenolic acids
pmn001420	341.09	342.095	C15H18O9	[M-H]-	1-O-[(E)-Caffeoyl]-β-D-glucopyranose	Phenolic acids	Phenolic acids
pmn001511	285.1	286.105	C13H18O7	[M-H]-	3-Hydroxy-5-Methylphenol-1-Oxy-β-D-Glucose	Phenolic acids	Phenolic acids
pmn001517	329.12	330.131	C15H22O8	[M-H]-	3,4,5-Trimethoxyphenyl-β-D-Glucopyranoside	Phenolic acids	Phenolic acids
pmn001523	473.04	474.043	C21H14O13	[M-H]-	1,3-Trigallic acid	Phenolic acids	Phenolic acids
pmn001612	753.22	754.232	C34H42O19	[M-H]-	β-D-(3-Mustard acyl)-fructosyl-α-D-(6-mustard acyl)glucoside	Phenolic acids	Phenolic acids
pmn001669	237.08	238.084	C12H14O5	[M-H]-	Methyl sinapate	Phenolic acids	Phenolic acids
pmn001671	547.17	548.174	C23H32O15	[M-H]-	β-D-Furanofructosyl-α-D-(6-mustard acyl)glucoside	Phenolic acids	Phenolic acids
pmn001672	547.17	548.174	C23H32O15	[M-H]-	β-D-Furanofructosyl-α-D-(3-mustard acyl)glucoside	Phenolic acids	Phenolic acids
pmn001682	179.03	180.042	C9H8O4	[M-H]-	Sorbic acid	Phenolic acids	Phenolic acids
pmn001695	371.1	372.106	C16H20O10	[M-H]-	Trihydroxycinnamoylquinic acid	Phenolic acids	Phenolic acids
pmn001710	521.13	522.137	C24H26O13	[M-H]-	Rosmarinyl Glucoside	Phenolic acids	Phenolic acids
pmn001714	655.3	328.133	C16H24O7	[2M-H]-	3-Hydroxy-4-isopropylbenzylalchol 3-glucoside	Phenolic acids	Phenolic acids
pmn001738	403.12	404.132	C17H24O11	[M-H]-	Oleoside 11-methyl ester	Phenolic acids	Phenolic acids
pmp000086	269.1	268.095	C13H16O6	[M+H]+	1-Feruloyl-sn-glycerol	Phenolic acids	Phenolic acids
pmp000091	445.15	444.142	C23H24O9	[M+H]+	Glyceryl 1,3-diferulate	Phenolic acids	Phenolic acids
pmp000232	339.11	338.1	C16H18O8	[M+H]+	Cis-3-p-coumaric quinic acid	Phenolic acids	Phenolic acids
pmp001086	127.04	126.032	C6H6O3	[M+H]+	5-Hydroxymethylfurfural	Phenolic acids	Phenolic acids
pmp001285	149.02	148.016	C8H4O3	[M+H]+	Phthalic anhydride	Phenolic acids	Phenolic acids

## Sheet: 31 nucleotides and derivatives
Index	Q1 (Da)	Molecular Weight (Da)	Formula	Ionization model	Compounds	Class I	Class II
mws0248	243.06	244.07	C9H12N2O6	[M-H]-	Uridine	Nucleotides and derivatives	Nucleotides and derivatives
mws0255	112.05	111.043	C4H5N3O	[M+H]+	Cytosine	Nucleotides and derivatives	Nucleotides and derivatives
mws0572	126.07	125.059	C5H7N3O	[M+H]+	5-Methylcytosine	Nucleotides and derivatives	Nucleotides and derivatives
mws0609	344.04	345.047	C10H12N5O7P	[M-H]-	Guanosine 3',5'-cyclic monophosphate	Nucleotides and derivatives	Nucleotides and derivatives
mws0668	283.07	284.076	C10H12N4O6	[M-H]-	Xanthosine	Nucleotides and derivatives	Nucleotides and derivatives
mws0675	335.06	334.057	C11H15N2O8P	[M+H]+	β-Nicotinamide mononucleotide	Nucleotides and derivatives	Nucleotides and derivatives
mws0847	150.08	149.07	C6H7N5	[M+H]+	1-Methyladenine	Nucleotides and derivatives	Nucleotides and derivatives
mws0884	328.05	329.053	C10H12N5O6P	[M-H]-	Cyclic AMP	Nucleotides and derivatives	Nucleotides and derivatives
mws1060	267.07	268.081	C10H12N4O5	[M-H]-	9-(β-D-Arabinofuranosyl)hypoxanthine	Nucleotides and derivatives	Nucleotides and derivatives
pmb0981	348.07	347.063	C10H14N5O7P	[M+H]+	Adenosine 5'-monophosphate	Nucleotides and derivatives	Nucleotides and derivatives
pmb0998	364.07	363.058	C10H14N5O8P	[M+H]+	Guanosine 5'-monophosphate	Nucleotides and derivatives	Nucleotides and derivatives
pmb2922	565.05	566.055	C15H24N2O17P2	[M-H]-	Uridine 5'-diphospho-D-glucose	Nucleotides and derivatives	Nucleotides and derivatives
pme0033	137.05	136.039	C5H4N4O	[M+H]+	Hypoxanthine	Nucleotides and derivatives	Nucleotides and derivatives
pme0040	136.06	135.054	C5H5N5	[M+H]+	Adenine	Nucleotides and derivatives	Nucleotides and derivatives
pme0183	152.06	151.049	C5H5N5O	[M+H]+	2-Hydroxy-6-aminopurine	Nucleotides and derivatives	Nucleotides and derivatives
pme0230	268.1	267.097	C10H13N5O4	[M+H]+	Adenosine	Nucleotides and derivatives	Nucleotides and derivatives
pme0264	243.1	242.09	C10H14N2O5	[M+H]+	Thymidine	Nucleotides and derivatives	Nucleotides and derivatives
pme1109	152.06	151.049	C5H5N5O	[M+H]+	Guanine	Nucleotides and derivatives	Nucleotides and derivatives
pme1173	137.05	136.039	C5H4N4O	[M+H]+	Allopurinol	Nucleotides and derivatives	Nucleotides and derivatives
pme1178	284.1	283.092	C10H13N5O5	[M+H]+	Guanosine	Nucleotides and derivatives	Nucleotides and derivatives
pme1194	228.1	227.091	C9H13N3O4	[M+H]+	Deoxycytidine	Nucleotides and derivatives	Nucleotides and derivatives
pme1474	298.1	297.09	C11H15N5O3S	[M+H]+	5'-Deoxy-5'-(methylthio)adenosine	Nucleotides and derivatives	Nucleotides and derivatives
pme2746	784.15	785.157	C27H33N9O15P2	[M-H]-	Flavin adenine dinucleotide(FAD)	Nucleotides and derivatives	Nucleotides and derivatives
pme3007	402.99	404.002	C9H14N2O12P2	[M-H]-	Uridine 5'-diphosphate	Nucleotides and derivatives	Nucleotides and derivatives
pme3174	324.06	323.052	C9H14N3O8P	[M+H]+	Cytidine 5'-monophosphate(Cytidylic acid)	Nucleotides and derivatives	Nucleotides and derivatives
pme3184	332.08	331.068	C10H14N5O6P	[M+H]+	2'-Deoxyadenosine-5'-monophosphate	Nucleotides and derivatives	Nucleotides and derivatives
pme3188	323.03	324.036	C9H13N2O9P	[M-H]-	Uridine 5'-monophosphate	Nucleotides and derivatives	Nucleotides and derivatives
pme3337	384.12	383.108	C14H17N5O8	[M+H]+	N6-Succinyl Adenosine	Nucleotides and derivatives	Nucleotides and derivatives
pme3732	244.09	243.086	C9H13N3O5	[M+H]+	Cytidine	Nucleotides and derivatives	Nucleotides and derivatives
pme3967	312.13	311.123	C12H17N5O5	[M+H]+	2-(Dimethylamino)guanosine	Nucleotides and derivatives	Nucleotides and derivatives
pme3968	166.07	165.065	C6H7N5O	[M+H]+	7-Methylguanine	Nucleotides and derivatives	Nucleotides and derivatives

## Sheet: 2
Supplementary Table 2: K-means group of 233 differential metabolites identified in pineapple fruits
Index	Group	Formula	Compounds	Class I	Class II
Hmfn00531	1	C6H8O6	L-Ascorbic acid	Others	Vitamin
Hmqp006235	1	C21H46N3O9P	LysoPC 18:4	Lipids	LPC
Huasheng_mad1424	1	C17H14O13	Ditartaroyl-hydroxylcoumarin	Phenolic acids	Phenolic acids
Lmhn002573	1	C17H20O11	Sinapoylglucuronic acid	Phenolic acids	Phenolic acids
Lmhn002926	1	C13H12O7	p-Coumaroylmalic acid	Phenolic acids	Phenolic acids
Lmhn003074	1	C14H14O8	Feruloylmalic acid	Phenolic acids	Phenolic acids
Lmhn003240	1	C11H10O6	Benzoylmalic acid	Phenolic acids	Phenolic acids
Lmnp001551	1	C9H10O3	3-Methoxy-4-hydroxy-acetophenone	Phenolic acids	Phenolic acids
Lmtn002565	1	C14H18O9	1'-O-Vanilloyl-β-D-glucoside	Phenolic acids	Phenolic acids
Qingke_Rfmb087-1-1	1	C18H32O4	13-Oxo-9-hydroxy-10-octadecenoic acid	Lipids	Free fatty acids
Qingke_Rfmb090-1-3	1	C18H32O3	13-Hydroxy-9,11-octadecadienoic acid	Lipids	Free fatty acids
Qingke_Rfmb091-1-1	1	C18H32O3	9-Hydroxy-10,12-octadecadienoic acid	Lipids	Free fatty acids
Qingke_Rfmb319-1-2	1	C6H11NO2	Pipecolic acid	Amino acids and derivatives	Amino acids and derivatives
Qingke_Rfmb320-1-3	1	C7H13NO2	1,2-N-Methylpipecolic acid	Amino acids and derivatives	Amino acids and derivatives
Zmhn001883	1	C14H18O9	Vanillic acid glycoside	Phenolic acids	Phenolic acids
Zmhn001926	1	C13H16O8	Salicylic acid O-glycoside	Phenolic acids	Phenolic acids
Zmhn002227	1	C17H22O10	Sinapic acid-glycoside	Phenolic acids	Phenolic acids
Zmhn002242	1	C15H18O9	Caffeoyl glucose	Phenolic acids	Phenolic acids
Zmhn002301	1	C15H18O8	p-Coumaric acid-O-glycoside	Phenolic acids	Phenolic acids
Zmhn002422	1	C16H20O9	Feruloyl glucose	Phenolic acids	Phenolic acids
Zmhn002513	1	C17H22O10	Isosinapic acid-hexoside	Phenolic acids	Phenolic acids
Zmxn001997	1	C13H16O8	Isosalicylic acid O-glycoside	Phenolic acids	Phenolic acids
mws0001	1	C4H8N2O3	L-Asparagine Anhydrous	Amino acids and derivatives	Amino acids and derivatives
mws0014	1	C10H10O4	Ferulic acid	Phenolic acids	Phenolic acids
mws0027	1	C9H10O5	Syringic acid	Phenolic acids	Phenolic acids
mws0028	1	C8H8O4	Vanillic acid	Phenolic acids	Phenolic acids
mws2125	2	C3H4KO6P	Phosphoenolpyruvic acid	Organic acids	Organic acids
mws2213	2	C9H8O2	Cinnamic acid	Phenolic acids	Phenolic acids
mws2523	2	C12H23O14P	Trehalose 6-phosphate	Others	Saccharides and Alcohols
mws2623	2	C18H34O2	11-Octadecanoic acid(Vaccenic acid)	Lipids	Free fatty acids
mws4085	2	C11H12O5	Sinapic acid	Phenolic acids	Phenolic acids
mws4134	2	C20H32N6O12S2	Oxidized Glutathione	Amino acids and derivatives	Amino acids and derivatives
mws4176	3	C12H16N2O3	Alanylphenylalanine	Amino acids and derivatives	Amino acids and derivatives
mws5035	3	C15H22N2O3	Leucylphenylalanine	Amino acids and derivatives	Amino acids and derivatives
mws5037	3	C9H18N2O3	Alanylleucine	Amino acids and derivatives	Amino acids and derivatives
mws5038	3	C12H22O11	Isomaltulose	Others	Saccharides and Alcohols
mws5041	3	C8H16N2O3	Glycylisoleucine	Amino acids and derivatives	Amino acids and derivatives
mws5042	3	C11H14N2O3	Glycylphenylalanine	Amino acids and derivatives	Amino acids and derivatives
pmb0164	3	C21H38O4	MAG(18:2)isomer1	Lipids	Glycerol ester
pmb0296	3	C21H40O4	MAG(18:1)isomer2	Lipids	Glycerol ester
pmb0423	3	C10H10O4	Hydroxy-methoxycinnamate	Phenolic acids	Phenolic acids
pmb0752	3	C17H20O9	3-O-Feruloyl quinic acid	Phenolic acids	Phenolic acids
pmb0767	3	C18H39NO2	D-erythro-Dihydrosphingosine	Lipids	Sphingolipids
pmb0854	3	C26H48NO7P	LysoPC 18:3	Lipids	LPC
pmb0855	3	C24H50NO7P	LysoPC 16:0	Lipids	LPC
pmb0856	3	C23H46NO7P	LysoPE 18:1(2n isomer)	Lipids	LPE
pmb0864	3	C19H40NO7P	LysoPE 14:0	Lipids	LPE
pmb0865	3	C26H48NO7P	LysoPC 18:3(2n isomer)	Lipids	LPC
pmb0874	3	C23H44NO7P	LysoPE 18:2(2n isomer)	Lipids	LPE
pmb0889	3	C18H30O2	Punicic acid	Lipids	Free fatty acids
pmb0890	3	C21H38O4	MAG(18:2)	Lipids	Glycerol ester
pmb2221	3	C18H39NO3	4-Hydroxysphinganine	Lipids	Sphingolipids
pmb2319	3	C23H48NO7P	LysoPC 15:0	Lipids	LPC
pmb2363	3	C21H40O4	MAG(18:1)isomer1	Lipids	Glycerol ester
pmb2444	3	C21H36O4	MAG(18:3)isomer1	Lipids	Glycerol ester
pmb2591	3	C13H14N2O3	Acetyltryptophan	Amino acids and derivatives	Amino acids and derivatives
pmb2778	3	C18H32O3	9,10-EODE	Lipids	Free fatty acids
pmb2786	3	C18H30O3	9-HOTrE	Lipids	Free fatty acids
pmb2787	3	C18H30O3	9-KODE	Lipids	Free fatty acids
pmb2792	3	C18H30O3	13-HOTrE(r)	Lipids	Free fatty acids
pmb2799	3	C18H32O3	12,13-EODE	Lipids	Free fatty acids
pmb2871	3	C13H16O9	2,5-Dihydroxy benzoic acid O-hexside	Phenolic acids	Phenolic acids
pmb2922	3	C15H24N2O17P2	Uridine 5'-diphospho-D-glucose	Nucleotides and derivatives	Nucleotides and derivatives
pmb2936	3	C28H32O14	Disinapoyl hexoside	Phenolic acids	Phenolic acids
pmb2940	3	C17H22O10	1-O-β-D-Glucopyranosyl sinapate	Phenolic acids	Phenolic acids
pmb3068	3	C16H18O8	1-O-p-Coumaroyl quinic acid	Phenolic acids	Phenolic acids
pmb3072	3	C22H26O12	3-O-p-coumaroyl shikimic acid O-hexoside	Phenolic acids	Phenolic acids
pmb3074	3	C16H18O8	3-O-p-Coumaroyl quinic acid	Phenolic acids	Phenolic acids
pmb3081	3	C6H11PO11	Glucarate O-Phosphoric acid	Others	Saccharides and Alcohols
pmb3099	3	C4H11O4P	Diethyl phosphate	Organic acids	Organic acids
pmb3107	3	C15H20O10	Syringic acid O-glucoside	Phenolic acids	Phenolic acids
pmd0130	3	C22H46NO7P	LysoPC 14:0(2n isomer)	Lipids	LPC
pmd0132	3	C24H50NO7P	LysoPC 16:0(2n isomer)	Lipids	LPC
pmd0136	3	C26H54NO7P	LysoPC 18:0(2n isomer)	Lipids	LPC
pmd0160	3	C21H44NO7P	LysoPE 16:0(2n isomer)	Lipids	LPE
pme0006	3	C5H9NO2	L-Proline	Amino acids and derivatives	Amino acids and derivatives
pme0008	3	C6H13N3O3	L-Citrulline	Amino acids and derivatives	Amino acids and derivatives
pme0014	3	C5H9NO4	L-Glutamic acid	Amino acids and derivatives	Amino acids and derivatives
pme0026	3	C6H14N2O2	L-(+)-Lysine	Amino acids and derivatives	Amino acids and derivatives
pme0033	3	C5H4N4O	Hypoxanthine	Nucleotides and derivatives	Nucleotides and derivatives
pme0040	3	C5H5N5	Adenine	Nucleotides and derivatives	Nucleotides and derivatives
pme0128	3	C6H12N2O3	AlanylAlanine	Amino acids and derivatives	Amino acids and derivatives
pme0170	3	C8H16N4O3	N-α-Acetyl-L-arginine	Amino acids and derivatives	Amino acids and derivatives
pme0181	3	C7H11N3O2	1-Methylhistidine	Amino acids and derivatives	Amino acids and derivatives
pme0183	3	C5H5N5O	2-Hydroxy-6-aminopurine	Nucleotides and derivatives	Nucleotides and derivatives
pme0193	3	C5H10N2O3	L-Glutamine	Amino acids and derivatives	Amino acids and derivatives
pme0230	3	C10H13N5O4	Adenosine	Nucleotides and derivatives	Nucleotides and derivatives
pme0241	3	C7H6O2	Benzoic acid	Phenolic acids	Phenolic acids
pme0253	3	C8H15NO3	N-Acetyl-L-leucine	Amino acids and derivatives	Amino acids and derivatives
pme0264	3	C10H14N2O5	Thymidine	Nucleotides and derivatives	Nucleotides and derivatives
pme0274	3	C6H13NO2	6-Aminocaproic acid	Organic acids	Organic acids
pme0278	4	C7H14N2O4	2,6-Diaminooimelic acid	Amino acids and derivatives	Amino acids and derivatives
pme0295	4	C6H11NO3	4-Acetamidobutyric acid	Organic acids	Organic acids
pme0500	4	C18H32O16	D-(+)-Melezitose	Others	Saccharides and Alcohols
pme0516	4	C6H12O6	Inositol	Others	Saccharides and Alcohols
pme0519	4	C12H22O11	D-(+)-Sucrose	Others	Saccharides and Alcohols
pme0534	4	C6H12O7	Gluconic acid	Others	Saccharides and Alcohols
pme1002	4	C8H11NO	L-Tyramine	Amino acids and derivatives	Amino acids and derivatives
pme1109	4	C5H5N5O	Guanine	Nucleotides and derivatives	Nucleotides and derivatives
pme1173	4	C5H4N4O	Allopurinol	Nucleotides and derivatives	Nucleotides and derivatives
pme1178	4	C10H13N5O5	Guanosine	Nucleotides and derivatives	Nucleotides and derivatives
pme1194	5	C9H13N3O4	Deoxycytidine	Nucleotides and derivatives	Nucleotides and derivatives
pme1210	5	C5H11NO2S	L-Methionine	Amino acids and derivatives	Amino acids and derivatives
pme1228	5	C11H12N2O3	5-Hydroxy-L-tryptophan	Amino acids and derivatives	Amino acids and derivatives
pme1286	5	C14H20N6O5S	S-(5'-Adenosy)-L-homocysteine	Amino acids and derivatives	Amino acids and derivatives
pme1383	5	C8H11NO3	Pyridoxine	Others	Vitamin
pme1419	6	C6H14ClNO2S	L-Methionine methyl ester	Amino acids and derivatives	Amino acids and derivatives
pme1439	6	C9H8O3	p-Coumaric acid	Phenolic acids	Phenolic acids
pme2049	6	C4H8O3	2-Hydroxybutanoic acid	Organic acids	Organic acids
pme2122	6	C5H9N3	Histamine	Amino acids and derivatives	Amino acids and derivatives
pme2253	6	C6H10O6	L-Gulonic-γ-lactone	Others	Saccharides and Alcohols
pme2596	6	C8H9NO4	4-Pyridoxic acid	Others	Vitamin
pme2743	6	C10H11NO3	N-Phenylacetylglycine	Amino acids and derivatives	Amino acids and derivatives
pme2890	6	C8H16N2O4S2	L-Homocystine	Amino acids and derivatives	Amino acids and derivatives
pme3009	6	C6H6O6	Trans-Citridic acid	Organic acids	Organic acids
pme3011	6	C4H9NO2	γ-Aminobutyric acid	Organic acids	Organic acids
pme3017	7	C4H9NO2	2-Aminoisobutyric acid	Amino acids and derivatives	Amino acids and derivatives
pme3033	7	C4H9NO2	N,N-Dimethylglycine	Amino acids and derivatives	Amino acids and derivatives
pme3154	7	C6H12O4	(Rs)-Mevalonic acid	Organic acids	Organic acids
pme3188	7	C9H13N2O9P	Uridine 5'-monophosphate	Nucleotides and derivatives	Nucleotides and derivatives
pme3337	7	C14H17N5O8	N6-Succinyl Adenosine	Nucleotides and derivatives	Nucleotides and derivatives
pme3388	7	C7H16N4O2	H-HomoArg-OH	Amino acids and derivatives	Amino acids and derivatives
pme3443	7	C11H12O4	Sinapinaldehyde	Phenolic acids	Phenolic acids
pme3705	8	C6H10O7	D-Glucoronic acid	Others	Saccharides and Alcohols
pme3732	8	C9H13N3O5	Cytidine	Nucleotides and derivatives	Nucleotides and derivatives
pme3827	8	C9H11NO4	3,4-Dihydroxyphenylalanine	Amino acids and derivatives	Amino acids and derivatives
pme3967	8	C12H17N5O5	2-(Dimethylamino)guanosine	Nucleotides and derivatives	Nucleotides and derivatives
pme3968	8	C6H7N5O	7-Methylguanine	Nucleotides and derivatives	Nucleotides and derivatives
pmf0424	8	C25H24O12	Isochlorogenic acid B	Phenolic acids	Phenolic acids
pmf0440	8	C10H10O2	4-MethoxycinnaMaldehyde	Phenolic acids	Phenolic acids
pmn001318	8	C21H20O7	1,3-O-Di-p-Coumaroyl glycerol	Phenolic acids	Phenolic acids
pmn001319	8	C22H22O8	1-O-Feruloyl-3-O-p-Coumaroyl glycerol	Phenolic acids	Phenolic acids
pmn001320	8	C12H14O5	1-O-p-Cumaroylglycerol	Phenolic acids	Phenolic acids
pmn001367	8	C13H16O9	Protocatechuic acid-4-glucoside	Phenolic acids	Phenolic acids
pmn001419	8	C15H18O8	1-O-[(E)-p-Cumaroyl]-β-D-glucopyranose	Phenolic acids	Phenolic acids
pmn001420	8	C15H18O9	1-O-[(E)-Caffeoyl]-β-D-glucopyranose	Phenolic acids	Phenolic acids
pmn001495	8	C19H38O4	Hexadecanoic acid 2,3-dihydroxypropyl ester	Lipids	Glycerol ester
pmn001511	8	C13H18O7	3-Hydroxy-5-Methylphenol-1-Oxy-β-D-Glucose	Phenolic acids	Phenolic acids
pmn001517	8	C15H22O8	3,4,5-Trimethoxyphenyl-β-D-Glucopyranoside	Phenolic acids	Phenolic acids
pmn001578	8	C16H32O2	Hexadecanoic acid	Lipids	Free fatty acids
pmn001588	9	C24H42O21	Nystose	Others	Saccharides and Alcohols
pmn001612	9	C34H42O19	β-D-(3-Mustard acyl)-fructosyl-α-D-(6-mustard acyl)glucoside	Phenolic acids	Phenolic acids
pmn001669	9	C12H14O5	Methyl sinapate	Phenolic acids	Phenolic acids
pmn001671	9	C23H32O15	β-D-Furanofructosyl-α-D-(6-mustard acyl)glucoside	Phenolic acids	Phenolic acids
pmn001672	9	C23H32O15	β-D-Furanofructosyl-α-D-(3-mustard acyl)glucoside	Phenolic acids	Phenolic acids
pmn001688	9	C18H32O3	9S-Hyroxy-10E,12E-octadecadienoic acid	Lipids	Free fatty acids
pmn001691	9	C18H32O5	9,12,13-Trihyroxy-10,15-octadecadienoic acid	Lipids	Free fatty acids
pmn001694	9	C18H34O5	9,10,13-Trihyroxy-11-octadecadienoic acid	Lipids	Free fatty acids
pmn001695	9	C16H20O10	Trihydroxycinnamoylquinic acid	Phenolic acids	Phenolic acids
pmn001710	9	C24H26O13	Rosmarinyl Glucoside	Phenolic acids	Phenolic acids
pmn001714	9	C16H24O7	3-Hydroxy-4-isopropylbenzylalchol 3-glucoside	Phenolic acids	Phenolic acids
pmn001738	9	C17H24O11	Oleoside 11-methyl ester	Phenolic acids	Phenolic acids
pmp000232	9	C16H18O8	Cis-3-p-coumaric quinic acid	Phenolic acids	Phenolic acids
pmp001251	9	C26H50NO7P	LysoPC 18:2(isomer)	Lipids	LPC
pmp001270	9	C24H48NO7P	LysoPC 16:1	Lipids	LPC
pmp001273	9	C26H50NO7P	LysoPC 18:2	Lipids	LPC
pmp001281	9	C26H52NO7P	LysoPC 18:1	Lipids	LPC
pmp001283	9	C21H38O4	Glyceryl linoleate	Lipids	Glycerol ester
mws0119	10	C14H28O2	Myristic Acid	Lipids	Free fatty acids
mws0120	10	C8H20NO6P	Choline alfoscerate	Lipids	PC
mws0126	10	C26H54NO7P	LysoPC 18:0	Lipids	LPC
mws0177	10	C5H4O3	2-Furanoic acid	Organic acids	Organic acids
mws0178	10	C16H18O9	Chlorogenic acid	Phenolic acids	Phenolic acids
mws0179	10	C17H20O9	Chlorogenic acid methyl ester	Phenolic acids	Phenolic acids
mws0193	10	C7H15N3O3	L-Homocitrulline	Amino acids and derivatives	Amino acids and derivatives
mws0208	10	C6H10O4	Adipic Acid	Organic acids	Organic acids
mws0213	10	C5H12O5	Ribitol	Others	Saccharides and Alcohols
mws0216	10	C5H9NO3	Trans-4-Hydroxy-L-proline	Amino acids and derivatives	Amino acids and derivatives
mws0219	10	C4H7NO4	L-AsparticAcid	Amino acids and derivatives	Amino acids and derivatives
mws0230	10	C4H9NO3	L-(-)-Threonine	Amino acids and derivatives	Amino acids and derivatives
mws0232	10	C17H20N4O6	Riboflavin	Others	Vitamin
mws0237	10	C9H16O4	Anchoic Acid	Organic acids	Organic acids
mws0242	10	C8H14O4	SubericAcid	Organic acids	Organic acids
mws0248	10	C9H12N2O6	Uridine	Nucleotides and derivatives	Nucleotides and derivatives
mws0250	10	C9H11NO3	L-(-)-Tyrosine	Amino acids and derivatives	Amino acids and derivatives
mws0254	10	C6H9N3O2	L-Histidine	Amino acids and derivatives	Amino acids and derivatives
mws0255	10	C4H5N3O	Cytosine	Nucleotides and derivatives	Nucleotides and derivatives
mws0256	10	C5H11NO2	L-Valine	Amino acids and derivatives	Amino acids and derivatives
mws0264	11	C12H22O11	D-(+)-TrehaloseAnhydrous	Others	Saccharides and Alcohols
mws0275	11	C4H6O5	L-(-)-Malic acid	Organic acids	Organic acids
mws0277	11	C7H12O6	Kinic acid	Organic acids	Organic acids
mws0279	11	C7H11N3O2	3-N-Methyl-L-histidine	Amino acids and derivatives	Amino acids and derivatives
mws0281	11	C6H8O7	Citric Acid	Organic acids	Organic acids
mws0282	11	C11H12N2O2	L-Tryptophan	Amino acids and derivatives	Amino acids and derivatives
mws0289	11	C23H46NO7P	LysoPE 18:1	Lipids	LPE
mws0366	11	C18H30O2	γ-Linolenic Acid	Lipids	Free fatty acids
mws0376	11	C4H4O4	Fumaric acid	Organic acids	Organic acids
mws0396	11	C18H34O2	Elaidic Acid	Lipids	Free fatty acids
mws0425	11	C5H6O4	Citraconic acid	Organic acids	Organic acids
mws0458	11	C8H8O3	Vanillin	Phenolic acids	Phenolic acids
mws0473	11	C5H8O4	2-Methylsuccinic acid	Organic acids	Organic acids
mws0567	11	C5H11N3O2	4-Guanidinobutyric acid	Organic acids	Organic acids
mws0572	11	C5H7N3O	5-Methylcytosine	Nucleotides and derivatives	Nucleotides and derivatives
mws0582	11	C11H19N3O6S	S-(methyl)glutathione	Amino acids and derivatives	Amino acids and derivatives
mws0596	11	C7H7NO3	3-Hydroxyanthranilic acid	Organic acids	Organic acids
mws0609	11	C10H12N5O7P	Guanosine 3',5'-cyclic monophosphate	Nucleotides and derivatives	Nucleotides and derivatives
mws0628	11	C7H6O2	4-Hydroxybenzaldehyde	Phenolic acids	Phenolic acids
mws0629	11	C13H16N2O5	Asp-phe	Amino acids and derivatives	Amino acids and derivatives
mws0636	11	C18H20N2O3	Phe-Phe	Amino acids and derivatives	Amino acids and derivatives
mws0668	11	C10H12N4O6	Xanthosine	Nucleotides and derivatives	Nucleotides and derivatives
mws0671	11	C4H9NO3	L-Homoserine	Organic acids	Organic acids
mws0736	11	C8H16N2O3	N-Glycyl-L-leucine	Amino acids and derivatives	Amino acids and derivatives
mws0847	11	C6H7N5	1-Methyladenine	Nucleotides and derivatives	Nucleotides and derivatives
mws0853	11	C11H14O4	Sinapyl alcohol	Phenolic acids	Phenolic acids
mws0866	11	C6H13O9P	D-Glucose 6-phosphate	Others	Saccharides and Alcohols
mws0884	11	C10H12N5O6P	Cyclic AMP	Nucleotides and derivatives	Nucleotides and derivatives
mws0890	11	C3H7NO3	L-Serine	Amino acids and derivatives	Amino acids and derivatives
mws0898	11	C10H12O2	Isoeugenol	Phenolic acids	Phenolic acids
mws0921	11	C9H10O2	p-Coumaryl alcohol	Phenolic acids	Phenolic acids
mws0924	11	C6H10O4	2-Methylglutaric acid	Organic acids	Organic acids
mws0972	12	C6H12O3	5-Hydroxyhexanoic acid	Organic acids	Organic acids
mws1024	12	C9H8O2	p-Coumaraldehyde	Phenolic acids	Phenolic acids
mws1050	12	C5H9NO4	O-Acetylserine	Amino acids and derivatives	Amino acids and derivatives
mws1060	12	C10H12N4O5	9-(β-D-Arabinofuranosyl)hypoxanthine	Nucleotides and derivatives	Nucleotides and derivatives
mws1078	12	C7H7NO2	Anthranilic Acid	Phenolic acids	Phenolic acids
mws1080	12	C12H22O11	Galactinol	Others	Saccharides and Alcohols
mws1090	12	C6H13O9P	Glucose-1-phosphate	Others	Saccharides and Alcohols
mws1195	12	C10H10O3	Methyl p-coumarate	Phenolic acids	Phenolic acids
mws1200	12	C10H10O3	Trans-4-Hydroxycinnamic Acid Methyl Ester	Phenolic acids	Phenolic acids
mws1208	12	C10H22O2	1,10-Decanediol	Others	Saccharides and Alcohols
mws1212	12	C11H12O4	Methyl ferulate	Phenolic acids	Phenolic acids
mws1213	12	C6H10O7	Aldehydo-D-galacturonate	Organic acids	Organic acids
mws1333	12	C12H22O11	Melibiose	Others	Saccharides and Alcohols
mws1336	12	C7H7NO2	4-Aminobenzoic acid	Phenolic acids	Phenolic acids
mws1337	12	C9H17NO5	D-Pantothenic Acid	Others	Vitamin
mws1350	12	C9H10O4	Syringic Aldehyde	Phenolic acids	Phenolic acids
mws1354	12	C10H10O4	Trans-ferulic acid	Phenolic acids	Phenolic acids
mws1490	12	C18H34O2	Oleic Acid	Lipids	Free fatty acids
mws1503	12	C9H8O	Cinnamaldehyde	Phenolic acids	Phenolic acids
mws1521	12	C13H18O7	Salicin	Phenolic acids	Phenolic acids
mws1584	12	C25H24O12	Cynarin	Phenolic acids	Phenolic acids
mws1589	12	C18H32O16	Panose	Others	Saccharides and Alcohols
mws2108	12	C16H18O9	Cryptochlorogenic acid	Phenolic acids	Phenolic acids
