# Supplementary material for: Metabolomic and transcriptomic analyses reveal the mechanism of sweet-acidic taste formation during pineapple fruit development
Source: Front Plant Sci. 2022 Sep 8;13:971506. doi: 10.3389/fpls.2022.971506 (PMC9493369; doi:10.3389/fpls.2022.971506)
Supplement: Supplementary file 4 [file Table_4.XLSX]

## Sheet: 56 amino acids and derivatives
Index	Q1 (Da)	Molecular Weight (Da)	Formula	Ionization model	Compounds	Class I	Class II
Qingke_Rfmb319-1-2	130.09	129.079	C6H11NO2	[M+H]+	Pipecolic acid	Amino acids and derivatives	Amino acids and derivatives
Qingke_Rfmb320-1-3	144.1	143.095	C7H13NO2	[M+H]+	1,2-N-Methylpipecolic acid	Amino acids and derivatives	Amino acids and derivatives
mws0001	133.06	132.054	C4H8N2O3	[M+H]+	L-Asparagine Anhydrous	Amino acids and derivatives	Amino acids and derivatives
mws0193	190.12	189.111	C7H15N3O3	[M+H]+	L-Homocitrulline	Amino acids and derivatives	Amino acids and derivatives
mws0216	132.07	131.058	C5H9NO3	[M+H]+	Trans-4-Hydroxy-L-proline	Amino acids and derivatives	Amino acids and derivatives
mws0219	132.03	133.038	C4H7NO4	[M-H]-	L-AsparticAcid	Amino acids and derivatives	Amino acids and derivatives
mws0227	132.1	131.095	C6H13NO2	[M+H]+	L-Leucine	Amino acids and derivatives	Amino acids and derivatives
mws0230	120.07	119.058	C4H9NO3	[M+H]+	L-(-)-Threonine	Amino acids and derivatives	Amino acids and derivatives
mws0250	182.08	181.074	C9H11NO3	[M+H]+	L-(-)-Tyrosine	Amino acids and derivatives	Amino acids and derivatives
mws0254	156.08	155.069	C6H9N3O2	[M+H]+	L-Histidine	Amino acids and derivatives	Amino acids and derivatives
mws0256	118.09	117.079	C5H11NO2	[M+H]+	L-Valine	Amino acids and derivatives	Amino acids and derivatives
mws0258	132.1	131.095	C6H13NO2	[M+H]+	L-Isoleucine	Amino acids and derivatives	Amino acids and derivatives
mws0260	175.12	174.112	C6H14N4O2	[M+H]+	L-(+)-Arginine	Amino acids and derivatives	Amino acids and derivatives
mws0279	170.09	169.085	C7H11N3O2	[M+H]+	3-N-Methyl-L-histidine	Amino acids and derivatives	Amino acids and derivatives
mws0282	203.08	204.09	C11H12N2O2	[M-H]-	L-Tryptophan	Amino acids and derivatives	Amino acids and derivatives
mws0582	322.11	321.099	C11H19N3O6S	[M+H]+	S-(methyl)glutathione	Amino acids and derivatives	Amino acids and derivatives
mws0629	281.11	280.106	C13H16N2O5	[M+H]+	Asp-phe	Amino acids and derivatives	Amino acids and derivatives
mws0636	313.15	312.147	C18H20N2O3	[M+H]+	Phe-Phe	Amino acids and derivatives	Amino acids and derivatives
mws0736	189.12	188.116	C8H16N2O3	[M+H]+	N-Glycyl-L-leucine	Amino acids and derivatives	Amino acids and derivatives
mws0890	104.04	105.043	C3H7NO3	[M-H]-	L-Serine	Amino acids and derivatives	Amino acids and derivatives
mws0923	200.05	199.04	C9H10ClNO2	[M+H]+	L-2-chlorophenylalanine	Amino acids and derivatives	Amino acids and derivatives
mws1050	148.06	147.053	C5H9NO4	[M+H]+	O-Acetylserine	Amino acids and derivatives	Amino acids and derivatives
mws1587	132.1	131.095	C6H13NO2	[M+H]+	α-Aminocaproic acid	Amino acids and derivatives	Amino acids and derivatives
mws4134	611.14	612.152	C20H32N6O12S2	[M-H]-	Oxidized Glutathione	Amino acids and derivatives	Amino acids and derivatives
mws4176	237.12	236.116	C12H16N2O3	[M+H]+	Alanylphenylalanine	Amino acids and derivatives	Amino acids and derivatives
mws5035	279.17	278.163	C15H22N2O3	[M+H]+	Leucylphenylalanine	Amino acids and derivatives	Amino acids and derivatives
mws5037	203.14	202.132	C9H18N2O3	[M+H]+	Alanylleucine	Amino acids and derivatives	Amino acids and derivatives
mws5041	189.12	188.116	C8H16N2O3	[M+H]+	Glycylisoleucine	Amino acids and derivatives	Amino acids and derivatives
mws5042	223.11	222.1	C11H14N2O3	[M+H]+	Glycylphenylalanine	Amino acids and derivatives	Amino acids and derivatives
pmb2591	245.09	246.1	C13H14N2O3	[M-H]-	Acetyltryptophan	Amino acids and derivatives	Amino acids and derivatives
pme0006	116.07	115.063	C5H9NO2	[M+H]+	L-Proline	Amino acids and derivatives	Amino acids and derivatives
pme0008	176.1	175.096	C6H13N3O3	[M+H]+	L-Citrulline	Amino acids and derivatives	Amino acids and derivatives
pme0014	148.06	147.053	C5H9NO4	[M+H]+	L-Glutamic acid	Amino acids and derivatives	Amino acids and derivatives
pme0021	166.09	165.07	C9H11NO2	[M+H]+	L-Phenylalanine	Amino acids and derivatives	Amino acids and derivatives
pme0026	147.11	146.106	C6H14N2O2	[M+H]+	L-(+)-Lysine	Amino acids and derivatives	Amino acids and derivatives
pme0122	189.12	188.116	C8H16N2O3	[M+H]+	N6-Acetyl-L-lysine	Amino acids and derivatives	Amino acids and derivatives
pme0128	159.08	160.085	C6H12N2O3	[M-H]-	AlanylAlanine	Amino acids and derivatives	Amino acids and derivatives
pme0137	187.07	188.08	C7H12N2O4	[M-H]-	N-α-Acetyl-L-glutamine	Amino acids and derivatives	Amino acids and derivatives
pme0170	217.13	216.122	C8H16N4O3	[M+H]+	N-α-Acetyl-L-arginine	Amino acids and derivatives	Amino acids and derivatives
pme0181	170.09	169.085	C7H11N3O2	[M+H]+	1-Methylhistidine	Amino acids and derivatives	Amino acids and derivatives
pme0193	147.08	146.069	C5H10N2O3	[M+H]+	L-Glutamine	Amino acids and derivatives	Amino acids and derivatives
pme0253	174.11	173.105	C8H15NO3	[M+H]+	N-Acetyl-L-leucine	Amino acids and derivatives	Amino acids and derivatives
pme0278	191.1	190.095	C7H14N2O4	[M+H]+	2,6-Diaminooimelic acid	Amino acids and derivatives	Amino acids and derivatives
pme1002	138.09	137.084	C8H11NO	[M+H]+	L-Tyramine	Amino acids and derivatives	Amino acids and derivatives
pme1086	306.08	307.084	C10H17N3O6S	[M-H]-	Glutathione reduced form	Amino acids and derivatives	Amino acids and derivatives
pme1210	150.06	149.051	C5H11NO2S	[M+H]+	L-Methionine	Amino acids and derivatives	Amino acids and derivatives
pme1228	221.09	220.085	C11H12N2O3	[M+H]+	5-Hydroxy-L-tryptophan	Amino acids and derivatives	Amino acids and derivatives
pme1286	385.13	384.122	C14H20N6O5S	[M+H]+	S-(5'-Adenosy)-L-homocysteine	Amino acids and derivatives	Amino acids and derivatives
pme1419	164.07	199.043	C6H14ClNO2S	[M-Cl]+	L-Methionine methyl ester	Amino acids and derivatives	Amino acids and derivatives
pme2122	112.09	111.08	C5H9N3	[M+H]+	Histamine	Amino acids and derivatives	Amino acids and derivatives
pme2743	194.08	193.074	C10H11NO3	[M+H]+	N-Phenylacetylglycine	Amino acids and derivatives	Amino acids and derivatives
pme2890	269.06	268.055	C8H16N2O4S2	[M+H]+	L-Homocystine	Amino acids and derivatives	Amino acids and derivatives
pme3017	104.07	103.063	C4H9NO2	[M+H]+	2-Aminoisobutyric acid	Amino acids and derivatives	Amino acids and derivatives
pme3033	104.07	103.063	C4H9NO2	[M+H]+	N,N-Dimethylglycine	Amino acids and derivatives	Amino acids and derivatives
pme3388	189.13	188.127	C7H16N4O2	[M+H]+	H-HomoArg-OH	Amino acids and derivatives	Amino acids and derivatives
pme3827	198.08	197.069	C9H11NO4	[M+H]+	3,4-Dihydroxyphenylalanine	Amino acids and derivatives	Amino acids and derivatives

## Sheet: 81 phenolic acids
Index	Q1 (Da)	Molecular Weight (Da)	Formula	Ionization model	Compounds	Class I	Class II
Huasheng_mad1424	427.05	426.043	C17H14O13	[M+H]+	Ditartaroyl-hydroxylcoumarin	Phenolic acids	Phenolic acids
Lmhn002573	399.09	400.101	C17H20O11	[M-H]-	Sinapoylglucuronic acid	Phenolic acids	Phenolic acids
Lmhn002926	279.05	280.058	C13H12O7	[M-H]-	p-Coumaroylmalic acid	Phenolic acids	Phenolic acids
Lmhn003074	309.06	310.069	C14H14O8	[M-H]-	Feruloylmalic acid	Phenolic acids	Phenolic acids
Lmhn003240	237.04	238.048	C11H10O6	[M-H]-	Benzoylmalic acid	Phenolic acids	Phenolic acids
Lmnp001551	167.07	166.063	C9H10O3	[M+H]+	3-Methoxy-4-hydroxy-acetophenone	Phenolic acids	Phenolic acids
Lmtn002565	329.11	330.095	C14H18O9	[M-H]-	1'-O-Vanilloyl-β-D-glucoside	Phenolic acids	Phenolic acids
Zmhn001883	329.09	330.095	C14H18O9	[M-H]-	Vanillic acid glycoside	Phenolic acids	Phenolic acids
Zmhn001926	299.08	300.084	C13H16O8	[M-H]-	Salicylic acid O-glycoside	Phenolic acids	Phenolic acids
Zmhn002227	385.11	386.121	C17H22O10	[M-H]-	Sinapic acid-glycoside	Phenolic acids	Phenolic acids
Zmhn002242	341.09	342.095	C15H18O9	[M-H]-	Caffeoyl glucose	Phenolic acids	Phenolic acids
Zmhn002301	325.09	326.1	C15H18O8	[M-H]-	p-Coumaric acid-O-glycoside	Phenolic acids	Phenolic acids
Zmhn002422	355.1	356.11	C16H20O9	[M-H]-	Feruloyl glucose	Phenolic acids	Phenolic acids
Zmhn002513	385.11	386.121	C17H22O10	[M-H]-	Isosinapic acid-hexoside	Phenolic acids	Phenolic acids
Zmxn001997	299.08	300.084	C13H16O8	[M-H]-	Isosalicylic acid O-glycoside	Phenolic acids	Phenolic acids
mws0014	193.05	194.058	C10H10O4	[M-H]-	Ferulic acid	Phenolic acids	Phenolic acids
mws0027	197.05	198.053	C9H10O5	[M-H]-	Syringic acid	Phenolic acids	Phenolic acids
mws0028	167.03	168.042	C8H8O4	[M-H]-	Vanillic acid	Phenolic acids	Phenolic acids
mws0178	353.09	354.095	C16H18O9	[M-H]-	Chlorogenic acid	Phenolic acids	Phenolic acids
mws0179	367.1	368.111	C17H20O9	[M-H]-	Chlorogenic acid methyl ester	Phenolic acids	Phenolic acids
mws0458	151.04	152.047	C8H8O3	[M-H]-	Vanillin	Phenolic acids	Phenolic acids
mws0628	121.03	122.037	C7H6O2	[M-H]-	4-Hydroxybenzaldehyde	Phenolic acids	Phenolic acids
mws0853	209.08	210.089	C11H14O4	[M-H]-	Sinapyl alcohol	Phenolic acids	Phenolic acids
mws0898	165.09	164.084	C10H12O2	[M+H]+	Isoeugenol	Phenolic acids	Phenolic acids
mws0921	149.06	150.068	C9H10O2	[M-H]-	p-Coumaryl alcohol	Phenolic acids	Phenolic acids
mws1024	147.05	148.052	C9H8O2	[M-H]-	p-Coumaraldehyde	Phenolic acids	Phenolic acids
mws1078	138.05	137.048	C7H7NO2	[M+H]+	Anthranilic Acid	Phenolic acids	Phenolic acids
mws1195	179.07	178.063	C10H10O3	[M+H]+	Methyl p-coumarate	Phenolic acids	Phenolic acids
mws1200	177.06	178.063	C10H10O3	[M-H]-	Trans-4-Hydroxycinnamic Acid Methyl Ester	Phenolic acids	Phenolic acids
mws1212	209.08	208.074	C11H12O4	[M+H]+	Methyl ferulate	Phenolic acids	Phenolic acids
mws1336	138.05	137.048	C7H7NO2	[M+H]+	4-Aminobenzoic acid	Phenolic acids	Phenolic acids
mws1350	181.05	182.058	C9H10O4	[M-H]-	Syringic Aldehyde	Phenolic acids	Phenolic acids
mws1354	193.05	194.058	C10H10O4	[M-H]-	Trans-ferulic acid	Phenolic acids	Phenolic acids
mws1503	133.06	132.058	C9H8O	[M+H]+	Cinnamaldehyde	Phenolic acids	Phenolic acids
mws1521	285.1	286.105	C13H18O7	[M-H]-	Salicin	Phenolic acids	Phenolic acids
mws1584	515.12	516.127	C25H24O12	[M-H]-	Cynarin	Phenolic acids	Phenolic acids
mws2108	353.09	354.095	C16H18O9	[M-H]-	Cryptochlorogenic acid	Phenolic acids	Phenolic acids
mws2212	179.03	180.042	C9H8O4	[M-H]-	Caffeic acid	Phenolic acids	Phenolic acids
mws2213	147.05	148.052	C9H8O2	[M-H]-	Cinnamic acid	Phenolic acids	Phenolic acids
mws4085	223.06	224.068	C11H12O5	[M-H]-	Sinapic acid	Phenolic acids	Phenolic acids
pmb0423	193.05	194.058	C10H10O4	[M-H]-	Hydroxy-methoxycinnamate	Phenolic acids	Phenolic acids
pmb0752	369.12	368.111	C17H20O9	[M+H]+	3-O-Feruloyl quinic acid	Phenolic acids	Phenolic acids
pmb2620	207.07	208.074	C11H12O4	[M-H]-	3,4-Dimethoxycinnamic acid	Phenolic acids	Phenolic acids
pmb2871	315.07	316.079	C13H16O9	[M-H]-	2,5-Dihydroxy benzoic acid O-hexside	Phenolic acids	Phenolic acids
pmb2936	591.17	592.179	C28H32O14	[M-H]-	Disinapoyl hexoside	Phenolic acids	Phenolic acids
pmb2940	385.11	386.121	C17H22O10	[M-H]-	1-O-β-D-Glucopyranosyl sinapate	Phenolic acids	Phenolic acids
pmb3068	337.09	338.1	C16H18O8	[M-H]-	1-O-p-Coumaroyl quinic acid	Phenolic acids	Phenolic acids
pmb3072	481.14	482.142	C22H26O12	[M-H]-	3-O-p-coumaroyl shikimic acid O-hexoside	Phenolic acids	Phenolic acids
pmb3074	337.09	338.1	C16H18O8	[M-H]-	3-O-p-Coumaroyl quinic acid	Phenolic acids	Phenolic acids
pmb3107	359.1	360.106	C15H20O10	[M-H]-	Syringic acid O-glucoside	Phenolic acids	Phenolic acids
pme0241	123.04	122.037	C7H6O2	[M+H]+	Benzoic acid	Phenolic acids	Phenolic acids
pme0281	165.02	166.027	C8H6O4	[M-H]-	Terephthalic acid	Phenolic acids	Phenolic acids
pme1439	165.05	164.047	C9H8O3	[M+H]+	p-Coumaric acid	Phenolic acids	Phenolic acids
pme1816	353.09	354.095	C16H18O9	[M-H]-	Neochlorogenic acid(5-O-Caffeoylquinic acid)	Phenolic acids	Phenolic acids
pme3437	213.08	212.068	C10H12O5	[M+H]+	Eudesmic acid(3,4,5-trimethoxybenzoic acid)	Phenolic acids	Phenolic acids
pme3443	207.07	208.074	C11H12O4	[M-H]-	Sinapinaldehyde	Phenolic acids	Phenolic acids
pmf0424	517.13	516.127	C25H24O12	[M+H]+	Isochlorogenic acid B	Phenolic acids	Phenolic acids
pmf0440	163.08	162.068	C10H10O2	[M+H]+	4-MethoxycinnaMaldehyde	Phenolic acids	Phenolic acids
pmn001318	383.11	384.121	C21H20O7	[M-H]-	1,3-O-Di-p-Coumaroyl glycerol	Phenolic acids	Phenolic acids
pmn001319	413.12	414.131	C22H22O8	[M-H]-	1-O-Feruloyl-3-O-p-Coumaroyl glycerol	Phenolic acids	Phenolic acids
pmn001320	237.08	238.084	C12H14O5	[M-H]-	1-O-p-Cumaroylglycerol	Phenolic acids	Phenolic acids
pmn001367	315.07	316.079	C13H16O9	[M-H]-	Protocatechuic acid-4-glucoside	Phenolic acids	Phenolic acids
pmn001419	325.09	326.1	C15H18O8	[M-H]-	1-O-[(E)-p-Cumaroyl]-β-D-glucopyranose	Phenolic acids	Phenolic acids
pmn001420	341.09	342.095	C15H18O9	[M-H]-	1-O-[(E)-Caffeoyl]-β-D-glucopyranose	Phenolic acids	Phenolic acids
pmn001511	285.1	286.105	C13H18O7	[M-H]-	3-Hydroxy-5-Methylphenol-1-Oxy-β-D-Glucose	Phenolic acids	Phenolic acids
pmn001517	329.12	330.131	C15H22O8	[M-H]-	3,4,5-Trimethoxyphenyl-β-D-Glucopyranoside	Phenolic acids	Phenolic acids
pmn001523	473.04	474.043	C21H14O13	[M-H]-	1,3-Trigallic acid	Phenolic acids	Phenolic acids
pmn001612	753.22	754.232	C34H42O19	[M-H]-	β-D-(3-Mustard acyl)-fructosyl-α-D-(6-mustard acyl)glucoside	Phenolic acids	Phenolic acids
pmn001669	237.08	238.084	C12H14O5	[M-H]-	Methyl sinapate	Phenolic acids	Phenolic acids
pmn001671	547.17	548.174	C23H32O15	[M-H]-	β-D-Furanofructosyl-α-D-(6-mustard acyl)glucoside	Phenolic acids	Phenolic acids
pmn001672	547.17	548.174	C23H32O15	[M-H]-	β-D-Furanofructosyl-α-D-(3-mustard acyl)glucoside	Phenolic acids	Phenolic acids
pmn001682	179.03	180.042	C9H8O4	[M-H]-	Sorbic acid	Phenolic acids	Phenolic acids
pmn001695	371.1	372.106	C16H20O10	[M-H]-	Trihydroxycinnamoylquinic acid	Phenolic acids	Phenolic acids
pmn001710	521.13	522.137	C24H26O13	[M-H]-	Rosmarinyl Glucoside	Phenolic acids	Phenolic acids
pmn001714	655.3	328.133	C16H24O7	[2M-H]-	3-Hydroxy-4-isopropylbenzylalchol 3-glucoside	Phenolic acids	Phenolic acids
pmn001738	403.12	404.132	C17H24O11	[M-H]-	Oleoside 11-methyl ester	Phenolic acids	Phenolic acids
pmp000086	269.1	268.095	C13H16O6	[M+H]+	1-Feruloyl-sn-glycerol	Phenolic acids	Phenolic acids
pmp000091	445.15	444.142	C23H24O9	[M+H]+	Glyceryl 1,3-diferulate	Phenolic acids	Phenolic acids
pmp000232	339.11	338.1	C16H18O8	[M+H]+	Cis-3-p-coumaric quinic acid	Phenolic acids	Phenolic acids
pmp001086	127.04	126.032	C6H6O3	[M+H]+	5-Hydroxymethylfurfural	Phenolic acids	Phenolic acids
pmp001285	149.02	148.016	C8H4O3	[M+H]+	Phthalic anhydride	Phenolic acids	Phenolic acids

## Sheet: 31 nucleotides and derivatives
Index	Q1 (Da)	Molecular Weight (Da)	Formula	Ionization model	Compounds	Class I	Class II
mws0248	243.06	244.07	C9H12N2O6	[M-H]-	Uridine	Nucleotides and derivatives	Nucleotides and derivatives
mws0255	112.05	111.043	C4H5N3O	[M+H]+	Cytosine	Nucleotides and derivatives	Nucleotides and derivatives
mws0572	126.07	125.059	C5H7N3O	[M+H]+	5-Methylcytosine	Nucleotides and derivatives	Nucleotides and derivatives
mws0609	344.04	345.047	C10H12N5O7P	[M-H]-	Guanosine 3',5'-cyclic monophosphate	Nucleotides and derivatives	Nucleotides and derivatives
mws0668	283.07	284.076	C10H12N4O6	[M-H]-	Xanthosine	Nucleotides and derivatives	Nucleotides and derivatives
mws0675	335.06	334.057	C11H15N2O8P	[M+H]+	β-Nicotinamide mononucleotide	Nucleotides and derivatives	Nucleotides and derivatives
mws0847	150.08	149.07	C6H7N5	[M+H]+	1-Methyladenine	Nucleotides and derivatives	Nucleotides and derivatives
mws0884	328.05	329.053	C10H12N5O6P	[M-H]-	Cyclic AMP	Nucleotides and derivatives	Nucleotides and derivatives
mws1060	267.07	268.081	C10H12N4O5	[M-H]-	9-(β-D-Arabinofuranosyl)hypoxanthine	Nucleotides and derivatives	Nucleotides and derivatives
pmb0981	348.07	347.063	C10H14N5O7P	[M+H]+	Adenosine 5'-monophosphate	Nucleotides and derivatives	Nucleotides and derivatives
pmb0998	364.07	363.058	C10H14N5O8P	[M+H]+	Guanosine 5'-monophosphate	Nucleotides and derivatives	Nucleotides and derivatives
pmb2922	565.05	566.055	C15H24N2O17P2	[M-H]-	Uridine 5'-diphospho-D-glucose	Nucleotides and derivatives	Nucleotides and derivatives
pme0033	137.05	136.039	C5H4N4O	[M+H]+	Hypoxanthine	Nucleotides and derivatives	Nucleotides and derivatives
pme0040	136.06	135.054	C5H5N5	[M+H]+	Adenine	Nucleotides and derivatives	Nucleotides and derivatives
pme0183	152.06	151.049	C5H5N5O	[M+H]+	2-Hydroxy-6-aminopurine	Nucleotides and derivatives	Nucleotides and derivatives
pme0230	268.1	267.097	C10H13N5O4	[M+H]+	Adenosine	Nucleotides and derivatives	Nucleotides and derivatives
pme0264	243.1	242.09	C10H14N2O5	[M+H]+	Thymidine	Nucleotides and derivatives	Nucleotides and derivatives
pme1109	152.06	151.049	C5H5N5O	[M+H]+	Guanine	Nucleotides and derivatives	Nucleotides and derivatives
pme1173	137.05	136.039	C5H4N4O	[M+H]+	Allopurinol	Nucleotides and derivatives	Nucleotides and derivatives
pme1178	284.1	283.092	C10H13N5O5	[M+H]+	Guanosine	Nucleotides and derivatives	Nucleotides and derivatives
pme1194	228.1	227.091	C9H13N3O4	[M+H]+	Deoxycytidine	Nucleotides and derivatives	Nucleotides and derivatives
pme1474	298.1	297.09	C11H15N5O3S	[M+H]+	5'-Deoxy-5'-(methylthio)adenosine	Nucleotides and derivatives	Nucleotides and derivatives
pme2746	784.15	785.157	C27H33N9O15P2	[M-H]-	Flavin adenine dinucleotide(FAD)	Nucleotides and derivatives	Nucleotides and derivatives
pme3007	402.99	404.002	C9H14N2O12P2	[M-H]-	Uridine 5'-diphosphate	Nucleotides and derivatives	Nucleotides and derivatives
pme3174	324.06	323.052	C9H14N3O8P	[M+H]+	Cytidine 5'-monophosphate(Cytidylic acid)	Nucleotides and derivatives	Nucleotides and derivatives
pme3184	332.08	331.068	C10H14N5O6P	[M+H]+	2'-Deoxyadenosine-5'-monophosphate	Nucleotides and derivatives	Nucleotides and derivatives
pme3188	323.03	324.036	C9H13N2O9P	[M-H]-	Uridine 5'-monophosphate	Nucleotides and derivatives	Nucleotides and derivatives
pme3337	384.12	383.108	C14H17N5O8	[M+H]+	N6-Succinyl Adenosine	Nucleotides and derivatives	Nucleotides and derivatives
pme3732	244.09	243.086	C9H13N3O5	[M+H]+	Cytidine	Nucleotides and derivatives	Nucleotides and derivatives
pme3967	312.13	311.123	C12H17N5O5	[M+H]+	2-(Dimethylamino)guanosine	Nucleotides and derivatives	Nucleotides and derivatives
pme3968	166.07	165.065	C6H7N5O	[M+H]+	7-Methylguanine	Nucleotides and derivatives	Nucleotides and derivatives

## Sheet: 3
Supplementary Table 4: The FPKM values and descriptions of all genes during fruit development in all samples
Gene_id	M11_fpkm	M12_fpkm	M13_fpkm	M21_fpkm	M22_fpkm	M23_fpkm	M31_fpkm	M32_fpkm	M33_fpkm	M41_fpkm	M42_fpkm	M43_fpkm	B11_fpkm	B12_fpkm	B13_fpkm	B21_fpkm	B22_fpkm	B23_fpkm	B31_fpkm	B32_fpkm	B33_fpkm	M2vsM1_M2	M2vsM1_M1	M2vsM1_log2FoldChange	M2vsM1_pvalue	M2vsM1_padj	M3vsM1_M3	M3vsM1_M1	M3vsM1_log2FoldChange	M3vsM1_pvalue	M3vsM1_padj	M4vsM1_M4	M4vsM1_M1	M4vsM1_log2FoldChange	M4vsM1_pvalue	M4vsM1_padj	M3vsM2_M3	M3vsM2_M2	M3vsM2_log2FoldChange	M3vsM2_pvalue	M3vsM2_padj	M4vsM2_M4	M4vsM2_M2	M4vsM2_log2FoldChange	M4vsM2_pvalue	M4vsM2_padj	M4vsM3_M4	M4vsM3_M3	M4vsM3_log2FoldChange
Aco009983	3782.55	6816.42	3514.35	21060.4	14223.7	14484.2	47907.6	54793.7	56036.1	52335	55218.7	43815.2	8656.08	10980.4	9207.79	47546.5	45104.3	44180.7	43204.5	35681.4	46046.5	228729	65019.3	1.81471	2.59e-11	1.52e-09	656413	57212.5	3.52021	2.25e-40	6.83e-39	657848	60306.9	3.44737	5.5e-43	1.33e-41	612900	188003	1.7049	3.73e-23	6.15e-22	616679	197643	1.64162	8.64e-24	1.1e-22	547428	563575	-0.0419364
Aco013999	23957.7	29446.9	19679.9	30692.9	49300.3	41455	2239.86	2638.27	2828.2	1290.67	444.538	364.857	20149.5	19820.6	19916.7	13998.9	31408	11836	733.029	739.471	774.321	651746	393142	0.729258	0.000743749	0.00551102	37188.3	345589	-3.21613	3.03e-63	1.98e-61	10623.7	364332	-5.09988	5.01e-16	3.52e-15	34722.8	535570	-3.94711	2.52e-103	5.07e-101	9974.2	563197	-5.81929	8.54e-20	8.73e-19	8864.64	31927.6	-1.84866
novel.473	7904.17	8735.31	10449.4	12790.4	16755.4	13815.6	8765.07	9748.85	4805.68	5463.83	6423.32	6237.39	6293.9	6071.4	5947.15	2889.85	3378.79	2540.02	4806.42	3607.29	3243.76	497481	311452	0.675632	2.67e-05	0.000332395	240401	273646	-0.18687	0.482597	0.599854	196625	288673	-0.553992	0.000119329	0.000313071	224483	408848	-0.864965	0.000189672	0.00055845	184271	429904	-1.22219	2.22e-21	2.49e-20	163558	206422	-0.33579
Aco004356	3027.38	3304.43	2591.53	1742.84	3596.8	4095.53	196.076	146.524	439.766	119.528	177.043	280.63	2370.07	2031.77	2647.05	1783.5	3459.35	1388.17	132.265	187.708	219.97	205123	194493	0.0767737	0.786052	0.893375	15316.2	170910	-3.48007	1.24e-21	1.5e-20	11877.7	180201	-3.92332	8.43e-46	2.2e-44	14300.1	168485	-3.55851	3.21e-09	1.75e-08	11125	177206	-3.99356	1.47e-16	1.24e-15	9872.54	13152.2	-0.413828
Aco006050	267.288	460.163	141.019	290.11	1708.7	386.274	4564.38	6029.93	2726.89	3056.18	3881.79	4798.96	506.611	648.412	708.357	4585.78	4322.1	2828.74	2452.75	2343.13	1835.26	41775	15222.7	1.45641	0.125792	0.297679	209295	13397.3	3.96555	3.77e-22	4.71e-21	194180	14115.2	3.78208	4.38e-14	2.72e-13	195431	34357.6	2.50795	0.00476535	0.010879	181934	36132.3	2.33205	0.00635517	0.0137355	161471	179678	-0.154142
Aco005343	1.35635	1.27885	0.272983	26.2336	38.6151	18.9328	1987.67	1795.69	1436.65	1428.05	1664.38	2065.04	2.26736	5.8579	10.1197	2698.79	1723.49	1623.67	2337.93	1790.8	1207.15	2620.08	91.2804	4.84436	4.28e-12	2.95e-10	146722	80.2032	10.8402	8.55e-131	2.46e-128	152515	84.4744	10.8202	9.75e-90	7.79e-88	137006	2154.23	5.99144	3.39e-145	1.76e-142	142910	2264.96	5.98004	1.35e-158	4.81e-156	126845	126006	0.00956835
Aco011306	352.316	675.792	381.591	1011.41	975.424	931.228	4187.53	4591.38	3326.14	3643.99	3737.52	3909.98	558.616	697.344	653.068	2229.53	1884.35	1961.74	5985.93	5115.12	3824.26	35306.9	17089.7	1.04685	1.36e-05	0.0001875	131693	15038.8	3.13044	1.26e-30	2.48e-29	129197	15854	3.02669	1.68e-36	3.19e-35	122969	29016.4	2.08335	1.17e-48	5.96e-47	121094	30508.4	1.98887	2.1e-123	4.13e-121	107495	113077	-0.0730213
Aco013510	791.403	907.606	866.034	1032.01	946.845	830.887	3875.7	4044.1	3964.9	3306.8	3726.82	3416.15	826.714	808.621	781.083	2554.9	1831.98	2555.5	4937.36	3765.9	3607.26	30181.9	27624.4	0.12772	0.305854	0.530377	114832	24275.5	2.24197	1.76e-99	2.72e-97	106153	25601.7	2.05184	5.55e-81	3.65e-79	107223	24807.3	2.1118	6.53e-69	6.13e-67	99492.2	26081.6	1.93158	5.09e-67	2.92e-65	88312.8	98600.7	-0.158974
Aco009712	1437.65	1737.5	1734.13	2110.67	2243.37	2308.85	919.292	1080.83	760.156	809.222	691.568	737.701	1455.64	1379.47	1274.43	440.068	530.325	392.445	545.55	507.683	434.49	123355	91104.9	0.437215	0.000187843	0.00174424	45945.4	80067.2	-0.801302	3.86e-06	1.34e-05	39175.7	84448.3	-1.10811	1.17e-18	9.67e-18	42901.1	101364	-1.24047	2.56e-17	2.81e-16	36726.7	106583	-1.53708	6.92e-57	3.01e-55	32607.9	39447.5	-0.274698
Aco005846	12.9043	16.4051	16.0475	54.2003	35.5409	16.7389	3557.46	3506.91	2898.58	3338.4	3705.19	3271.73	55.7208	40.6564	50.2471	1646.98	568.866	866.79	3381.6	3531.18	2216.94	1598.17	682.438	1.22743	0.000570181	0.00443202	134497	599.825	7.80894	0	0	146421	632.646	7.85468	0	0	125588	1314.45	6.57824	1.11e-48	5.64e-47	137240	1381.53	6.63443	7.66e-51	2.82e-49	121821	115495	0.0769447
Aco021907	1003.86	1155.51	1018.31	2382.05	2094.66	2077.93	2849.87	3567.8	2200.31	2592.39	4022.1	3061.89	1728.13	1973.75	2009.86	6896.25	7020.33	5468.34	4969.43	5045.2	4637.6	41133.5	19995.8	1.04064	1.1e-19	2.48e-17	48620.8	17572.5	1.46826	1.27e-13	9.01e-13	57451.4	18530.8	1.63243	1.05e-19	9.04e-19	45399.3	33805.4	0.425407	0.0156264	0.0317658	53832.4	35542.6	0.598926	0.000135651	0.000384205	47770.1	41742.2	0.194612
Aco016147	4339.66	5637.38	4864.3	6456.67	5454.93	6274.85	837.744	1038.73	1273.72	888.602	847.646	867.002	5159.49	5276.1	5812.83	4232.26	6212.14	4884.08	2106.1	1676.14	2034.02	94086.3	76976.8	0.289574	0.0363698	0.122866	14665.5	67665.8	-2.20596	6.3e-29	1.13e-27	12735.6	71358.1	-2.4862	9.8e-85	7.02e-83	13692.9	77314	-2.49725	1.4e-50	7.64e-49	11938.1	81289.8	-2.76752	1.25e-180	5.78e-178	10598.2	12590.2	-0.248551
Aco001511	57.3149	69.8195	58.8972	56.7294	45.5457	58.6932	2428.15	2549.58	3722.92	2587.87	4934.59	4538.1	68.9916	68.8786	64.1565	1002.3	581.759	1036.75	1218.34	1457.33	1633.51	2487.54	2882.89	-0.212218	0.163278	0.354988	121032	2533.86	5.578	6.63e-161	3.47e-158	176462	2671.98	6.04537	5.22e-144	1.21e-141	113006	2043.91	5.78865	7.42e-211	9.88e-208	165293	2149.06	6.26495	8.96e-200	5.51e-197	146656	103918	0.49699
Aco001449	7409.09	8123	5920.98	3755.92	2835.36	3575.53	862.244	981.754	1193.78	1129.82	1271.22	964.84	4393.85	4338.05	3613.59	1688.2	2248.79	2782.13	1590.36	1548.55	2901.64	58591	124031	-1.08193	2.25e-10	1.09e-08	15755.2	108995	-2.79033	7.85e-49	3.21e-47	18343.9	114912	-2.64713	1.93e-57	7.17e-56	14710.6	48144.7	-1.71049	2.39e-25	4.47e-24	17195	50619.7	-1.5577	4.06e-28	6.4e-27	15263.2	13526.7	0.174215
Aco005546	1.26884	2.51751	4.11813	77.6403	28.1191	18.1557	6650.36	5554.96	7577.36	6161.01	6817.14	5133.21	14.3198	43.6494	0.572186	2766.2	1122.32	2987.82	3690.78	2379.72	3821.92	966.361	61.749	3.9671	1.61e-07	3.86e-06	138925	54.2911	11.3171	3.15e-244	4.84e-241	133623	57.3128	11.1824	2.4e-280	3.06e-277	129720	794.849	7.35052	3.08e-29	7.06e-28	125258	835.261	7.22848	1.26e-28	2.04e-27	111187	119308	-0.101699
Aco012091	112.873	119.372	86.6932	197.064	265.138	148.682	2555.92	2751.72	2617.33	2251.58	2655.74	2445.07	196.579	308.795	409.182	2371.25	2173.32	2396.1	1827.32	1604.98	1482.98	8156.12	4269.35	0.933803	5.14e-05	0.000585384	95127.3	3751.49	4.66449	3.17e-188	2.43e-185	92799.6	3955.05	4.55251	4.44e-190	1.86e-187	88823.2	6705.39	3.72774	4.03e-82	5.07e-80	86971.7	7050.05	3.62506	1.12e-86	1e-84	77195.8	81678.8	-0.0814384
Aco016393	90.2352	158.01	104.56	81.9165	45.2108	97.5942	1939.46	2177.38	2468.99	1147.33	1563.13	1383.92	115.271	135.439	112.905	3693.1	1576.86	2753.32	6764.09	6678.89	5014.97	2168.05	3412.59	-0.654029	0.0298556	0.106038	57195	3002.15	4.25197	6.19e-74	5.28e-72	37389.3	3165.35	3.56234	3.44e-56	1.22e-54	53403.3	1780.8	4.90574	7.84e-96	1.37e-93	35036.1	1872.47	4.22518	8.33e-78	6.11e-76	31094	49106.1	-0.65928
Aco003191	2246.99	2732.55	2723.33	3302	2540.96	3463.59	1240.75	1471.22	1148.34	1289.28	1655.11	1810.33	2791.52	3257.28	2822.12	3056.68	3587.83	2759.39	1073.39	1327.22	1470.74	63395.1	52611	0.269027	0.0890061	0.231848	23652	46237.6	-0.967117	3.97e-10	2.11e-09	30652.4	48767.6	-0.669939	5.05e-05	0.000139067	22084.6	52087.3	-1.23792	3.11e-15	2.89e-14	28721.3	54766.9	-0.93122	3.22e-09	1.53e-08	25490.8	20306.6	0.32802
Aco017273	272.831	457.885	243.447	467.412	708.53	442.37	1756.83	1638.38	1500.21	1323.55	1265.57	1707.58	388.117	438.962	449.411	1924.75	2392.78	1749.28	1956.79	1730.8	1446.81	21979.2	13254.2	0.729697	0.00756873	0.0367197	59771.6	11660.7	2.35785	5.25e-21	6.1e-20	55171.2	12291.5	2.1663	2e-18	1.62e-17	55812.4	18067.2	1.62728	4.32e-18	5.01e-17	51705.6	18997.2	1.44459	1.47e-14	1.08e-13	45900.5	51329.4	-0.161283
Aco000637	83.638	97.2859	78.9855	234.182	154.951	145.219	1919.06	2448.16	2569.83	1814.91	1399.7	1485.73	83.6198	91.1573	78.4212	1080.66	545.822	1187.38	3479.55	2853.1	3724.61	6253.44	3050.74	1.03558	5.17e-07	1.1e-05	73046.9	2681.16	4.76805	1.13e-176	7.91e-174	52001.5	2827.12	4.20133	1.46e-180	5.52e-178	68203.3	5140.47	3.72988	1.63e-78	1.88e-76	48757.6	5403.85	3.17358	5.49e-69	3.33e-67	43294	62709.2	-0.534516
Aco012837	1175.36	1394.59	1350.73	1548.21	1641.56	1716.36	1065.47	1415.84	657.396	783.145	728.556	791.935	1272.19	1195.96	1210.15	352.837	499.127	297.84	542.608	511.281	434.864	61132.5	48973.2	0.319952	0.0038726	0.0214365	35145.5	43038.9	-0.292312	0.270334	0.378875	27140	45391.8	-0.742019	1.95e-11	1.01e-10	32817.2	50233.5	-0.614212	0.0069485	0.0153276	25440.2	52820	-1.054	1.29e-32	2.5e-31	22585.2	30171.9	-0.417808
Aco020962	572.374	650.984	618.972	591.048	623.977	683.946	898.828	1025.44	980.976	1306.22	1208.21	1048.34	689.925	774.412	640.18	1242.62	1087.59	1254	1655.69	1382.73	1598.59	24259.2	23596.7	0.0399878	0.713719	0.85246	33382.1	20735.7	0.686977	3.55e-09	1.71e-08	43020.6	21868.4	0.976207	1.57e-15	1.07e-14	31169.5	19933.2	0.644946	1.84e-08	9.25e-08	40332.9	20959.9	0.944321	1.02e-16	8.69e-16	35808	28661	0.321198
Aco016338	64.7573	126.042	94.5344	205.563	186.887	228.182	1539.12	1717.6	1432.67	1121.71	1342.3	1235.13	241.308	269.862	296.311	1007.8	614.216	754.172	1618.94	1527.93	1103.66	10206.4	4700.99	1.11855	1.28e-06	2.42e-05	69360.7	4136.03	4.06787	1.94e-62	1.22e-60	57543.2	4361.68	3.72177	1.72e-59	6.7e-58	64764.7	8386.07	2.94902	2.26e-118	6.11e-116	53928.5	8817.79	2.61241	2.37e-115	3.96e-113	47866.2	59553.7	-0.315179
Aco018596	805.97	960.368	887.286	999.124	1199.01	1097.01	1088.55	1162.76	1247.88	1343.58	1576.37	1347.65	932.114	1051.37	929.46	1389.94	1463.67	1430.37	1735.26	1509.85	1709.45	31749.2	25628.5	0.30896	0.012784	0.0550855	30325	22523.7	0.429094	0.000743432	0.00188257	38878.8	23753.7	0.71085	1.24e-08	5.02e-08	28315	26090.9	0.118064	0.335231	0.438346	36439.2	27434.5	0.409534	0.000340169	0.000906355	32343.6	26037.6	0.312872
Aco006176	48.4654	60.1426	48.8763	82.8426	64.2999	81.2394	739.52	839.354	1145.13	737.146	876.685	778.649	80.9431	86.5557	78.363	1546.29	917.745	1109.23	1965.4	2305.53	1682.62	3807.79	2633.08	0.532624	0.000727709	0.00541748	40879.3	2314.43	4.14277	1.33e-90	1.7e-88	37734.1	2440.5	3.95087	2.15e-179	8e-177	38168.3	3128.83	3.60852	9.58e-86	1.29e-83	35364.9	3289.72	3.42591	2.74e-160	1.03e-157	31389.6	35096.7	-0.161074
Aco002827	1050.52	1317.31	1212.12	1527.79	1832.58	1666.17	425.811	458.051	344.994	401.079	421.237	406.667	1041.53	1086.08	982.456	326.312	423.509	375.728	500.206	416.212	416.266	69499.2	49609.2	0.486384	0.000261162	0.00229676	15275.4	43603.9	-1.51327	2.15e-20	2.4e-19	16065.5	45986	-1.51722	6.43e-37	1.24e-35	14263.5	57113.5	-2.00154	5.62e-44	2.41e-42	15058.3	60054.6	-1.99569	8.2e-88	7.51e-86	13367.1	13116.3	0.0273884
Aco006349	393.508	603.614	357.797	697.783	825.388	753.546	599.445	544.49	489.597	530.01	657.014	755.072	588.108	655.038	526.357	834.964	843.803	777.514	469.35	481.807	371.796	41767.3	24911.8	0.745565	0.000343142	0.00289306	26949.3	21910.9	0.298611	0.185275	0.276634	33704.6	23098.2	0.545178	0.0161562	0.0306841	25164.4	34323.8	-0.447839	0.00050292	0.00138235	31581.4	36091.2	-0.192581	0.174881	0.261566	28029.9	23143.6	0.276352
Aco019014	570.902	837.582	744.571	567.973	513.662	622.407	3959.72	4160.29	3747.08	2999.96	3185.38	2699.6	444.47	494.895	513.635	1108.16	952.12	1145.3	2513.54	2381.71	2379.36	10927.8	13838.2	-0.340581	0.0427318	0.137744	68454	12167.1	2.49217	3.05e-47	1.17e-45	53877.4	12832.2	2.06994	7.6e-36	1.4e-34	63918.3	8978.85	2.8315	4.14e-129	1.38e-126	50503.2	9441.03	2.41923	9.96e-106	1.35e-103	44831.2	58778.3	-0.390761
Aco012772	11.4977	27.4549	11.3676	42.9009	35.4608	54.5015	1785.98	2047.26	1665.15	1007.39	1259.38	1470.17	19.0339	18.977	18.4514	642.848	293.006	357.349	1334.7	1374.82	924.341	2030.48	770.543	1.39862	4.35e-05	0.000506071	75584.3	678.533	6.80017	4.77e-92	6.28e-90	54050.6	715.127	6.24063	1.81e-82	1.23e-80	70575.6	1668	5.40226	2.21e-222	3.37e-219	50644.7	1753.94	4.85106	4.33e-166	1.71e-163	44949.1	64895.6	-0.529839
Aco003606	111.011	109.188	100.014	234.498	179.749	113.962	466.392	426.747	465.119	351.711	394.656	358.632	290.75	336.863	338.983	701.666	685.828	579.088	591.344	635.691	482.698	13259.3	8062.49	0.71768	0.00293212	0.0170261	30674.6	7082.81	2.11471	5.93e-82	6.21e-80	26232.3	7468.81	1.81245	8.67e-69	4.33e-67	28642.3	10902.4	1.39356	3.42e-10	2.06e-09	24586.6	11460.4	1.10127	1.15e-07	4.71e-07	21824	26341.9	-0.271435
Aco006995	63.3815	88.004	88.0399	123.59	101.094	131.83	690.906	737.798	768.057	716.077	589.801	664.668	116.936	131.528	169.626	791.466	641.093	617.384	909.779	918.288	780.428	7307.01	4918.62	0.571141	0.00120809	0.00826267	40510.3	4323.88	3.2279	2.01e-81	2.08e-79	38188	4560.79	3.06577	1.62e-77	1e-75	37825.3	6003.72	2.65523	2.07e-88	3.06e-86	35801	6312.65	2.50346	1.47e-85	1.28e-83	31786.8	34783	-0.129971
Aco010535	674.671	692.28	683.051	796.79	907.591	896.122	586.684	700.151	691.475	847.552	765.584	793.065	627.175	719.283	678.243	779.022	818.572	910.334	888.691	718.183	855.63	30580.7	24172.1	0.339272	0.000559671	0.0043569	20923.4	21236.3	-0.0213867	0.857761	0.900045	26748.3	22396.2	0.256205	0.0027173	0.00591116	19536.3	25129.2	-0.363171	0.00344937	0.00810841	25074.9	26423.4	-0.0755571	0.435139	0.547478	22261.7	17963.5	0.309467
Aco006202	219.017	289.467	227.708	385.684	380.21	335.741	1156.05	1116.96	1070.7	835.634	935.319	960.317	240.049	245.645	238.184	858.158	628.671	766.813	1350.76	1088.03	1013.03	15020.3	10061.9	0.578042	8.15e-05	0.000860657	41005	8845.55	2.21284	3.98e-48	1.59e-46	35220.1	9327.27	1.91693	9.26e-39	1.92e-37	38288.4	12345.1	1.63303	9.93e-49	5.07e-47	33008	12979.6	1.34663	1.36e-37	3.23e-36	29298.9	35211.8	-0.265215
Aco000051	0.401576	0.0732658	0	1.8244	2.38199	0	3845.84	5779.04	5262.52	4703.07	4083.67	3776.51	0.515846	2.2679	1.52921	3061.01	443.486	1064.86	4838.09	3829.63	3798.25	19.4654	2.21348	3.13755	0.0631088	0.183152	61901.9	1.93613	14.9844	3.05e-143	1.1e-140	54899.5	2.03849	14.7355	1.4e-150	3.79e-148	57796.4	16.0216	11.8213	7.52e-18	8.59e-17	51471.9	16.8393	11.5823	2.01e-17	1.8e-16	45699.8	53133.9	-0.217449
Aco010626	1244.49	1490.22	1953.4	1696.15	1375.34	1542.35	3.3042	10.8137	3.25063	0.41629	0.580296	0.494925	919.032	736.068	808.16	2.86266	65.9817	26.8867	1.62831	1.31782	4.8754	64921.1	66117.4	-0.0263445	0.886387	0.946981	219.477	58098	-8.04845	3.42e-35	8.22e-34	19.8567	61298.2	-11.5922	0	0	204.911	53350.7	-8.02454	1.88e-37	6.24e-36	18.6069	56092.7	-11.5576	0	0	16.513	188.248	-3.51041
novel.336	272.588	205.184	214.733	420.627	514.036	534.365	683.151	558.664	310.897	413.037	493.621	458.113	197.258	170.912	179.152	400.037	278.255	184.544	578.61	538.485	414.488	34907.3	16510.7	1.08013	5.86e-11	3.21e-09	33165.9	14495.2	1.1941	2.33e-05	7.38e-05	30668.8	15285.3	1.00462	2.21e-11	1.14e-10	30971.4	28681.9	0.110771	0.645537	0.729585	28742.2	30160.4	-0.0694909	0.57663	0.673348	25511.2	28488.1	-0.1592
Aco004676	40.3357	67.8221	37.8356	50.0948	35.5669	36.5796	1985.84	1916.05	1813.16	2085.59	2343.03	2314.99	51.0771	49.0217	46.0091	1094.57	528.106	772.767	2825.53	2197.29	2086.46	1093.19	1308.82	-0.259272	0.318904	0.544106	45981.5	1151.44	5.32002	9.62e-110	1.82e-107	57050.5	1213.79	5.55517	2.08e-135	4.35e-133	42935.2	898.513	5.57829	2.64e-285	1.4e-281	53468.3	944.609	5.82259	0	0	47460.2	39485.4	0.265407
Aco013111	0.48003	1.26504	0.0653623	18.3552	36.6055	10.6059	928.169	809.122	807.755	767.758	830.008	979.445	130.274	228.818	305.944	1029.51	817.811	735.112	1077.47	838.393	815.635	1142.32	31.576	5.17975	1.66e-06	3.02e-05	39845.5	27.836	10.487	6.19e-27	9.96e-26	42430.5	29.3064	10.5033	6.39e-27	8.08e-26	37206.3	939.5	5.30792	8.63e-25	1.55e-23	39763.3	987.795	5.33148	2.14e-24	2.81e-23	35295.7	34219.6	0.044665
Aco011020	1171.76	1590.64	1288.18	1620.63	1772.73	1949.89	637.849	681.717	658.657	531.669	537.715	571.532	729.847	704.517	623.969	305.961	388.096	367.718	663.023	546.006	592.645	52352.1	39779.9	0.396227	0.00894014	0.0419227	17433.2	34972.6	-1.00437	6.15e-11	3.52e-10	15203.4	36878.9	-1.2784	3.86e-19	3.24e-18	16277.9	43015.4	-1.40194	1.35e-34	3.9e-33	14249.9	45231.7	-1.66642	1.51e-60	7.22e-59	12649.8	14968.7	-0.242874
Aco026975	0	0.0718892	0	0.708588	0	0.065512	2365.89	2178.17	2496.94	1643.31	1735.15	2114.33	0.0361539	0.570587	1.22407	1221.71	735.691	798.154	1935.93	1664.84	1324.41	7.28112	0.676976	3.4676	0.135398	0.313348	59695.8	0.599196	16.7402	1.87e-59	1.08e-57	48964.1	0.630648	16.377	9.26e-57	3.35e-55	55740.3	5.99068	13.1797	1.67e-26	3.34e-25	45886.4	6.29222	12.828	6.23e-25	8.43e-24	40731.6	51263	-0.331791
Aco004933	51.8776	107.015	82.5128	105.259	49.783	119.626	2202.27	2529.94	2715.94	1985.09	2392.83	2591.55	58.2678	59.6547	40.3619	684.58	308.938	495.443	1055.68	1247	955.949	2606.45	2295.98	0.183291	0.590853	0.772913	63624.5	2020.22	4.97713	5.37e-82	5.64e-80	62608.8	2130.55	4.8772	4.4e-86	3.25e-84	59406.6	2140.89	4.79388	1.98e-77	2.22e-75	58669.1	2251.03	4.70369	6.91e-41	1.83e-39	52072.9	54625.4	-0.0690598
Aco004215	10.0133	2.05032	2.516	57.3553	4.46296	7.25818	1670.28	3094.08	3898.05	3650.63	4191.88	2262.96	14.991	297.429	2.07909	4242.42	1359.61	3521.92	4141.46	2616.72	5359.87	296.255	63.0383	2.23258	0.0689106	0.194833	33479.1	55.1811	9.24465	6.11e-29	1.1e-27	41025.2	58.1511	9.46221	2.26e-32	3.64e-31	31256.8	243.725	7.00266	4.73e-10	2.8e-09	38462.1	256.03	7.23087	5.56e-11	3.08e-10	34141.1	28732.4	0.248825
Aco013373	1094.41	1581.05	1268.56	1957.5	1900.1	1667.19	1325.31	1323.99	1121.87	1289.7	1584.32	1562.66	1969.95	2070.38	1831.88	959.973	1023.34	815.574	893.584	1206.47	938.092	30435.3	21775.1	0.48307	0.00292501	0.0169944	18682.8	19146.3	-0.0353453	0.842275	0.888044	23118.7	20190.2	0.195424	0.253427	0.350596	17445.2	25014.9	-0.519965	4.22e-05	0.000138013	21664.8	26300.5	-0.27972	0.0194829	0.0379119	19228.9	16043.1	0.261347
Aco022812	0	0	0	0	0	0.196126	3240.51	4087.87	3016.06	3242.95	2899.43	3404.14	1.24471	4.09967	1.65497	1884.05	261.823	561.991	2721.21	2023.76	1432.84	1.23334	0	2.86077	0.472501	1	58556	0	18.5674	1.1e-54	5.44e-53	56829.2	0	18.4475	1.2e-54	4.03e-53	54675.3	1.01031	15.5356	8.23e-98	1.46e-95	53269.6	1.06335	15.4233	6.49e-99	7.49e-97	47292.8	50270.9	-0.0881038
Aco012764	1.27023	2.65828	2.0259	23.2103	28.9069	4.91947	2032.25	2328.28	958.405	1494.3	1650.93	1914.93	2.75602	27.0714	35.5366	2620.01	1525.28	1096.7	2214.38	2317.56	809.333	472.738	49.3956	3.25873	4.33e-09	1.57e-07	39589.3	43.4643	9.83383	8.61e-162	4.84e-159	39646.4	45.8376	9.76251	0	0	36968.1	388.944	6.57102	1.15e-17	1.28e-16	37153.7	408.837	6.50639	4.96e-21	5.47e-20	32978.7	33992.8	-0.0436811
Aco017493	480.423	651.287	443.383	576.91	463.562	554.194	524.389	432.569	823.824	209.742	198.29	283.176	539.744	512.188	615.315	887.302	928.378	1014.15	1726.04	1851.56	1402.6	16634.9	16475.7	0.0139549	0.937766	0.972341	16727	14485.9	0.207574	0.444731	0.564175	6822.04	15272.5	-1.1627	9.81e-09	3.99e-08	15618	13669.4	0.192283	0.381712	0.485215	6393.32	14372.2	-1.16882	3.05e-14	2.2e-13	5675.53	14364.1	-1.33975
Aco014969	780.234	856.075	881.25	1311.88	1331.07	1134.1	1105.08	1314.78	1134.71	1426.53	1338.59	1388.89	1043.26	1069.08	1101.98	697.961	806.146	631.026	649.017	654.231	589.721	28536.8	19068.8	0.581563	3.98e-07	8.76e-06	24150.3	16755	0.527445	2.66e-05	8.32e-05	29671.6	17671.6	0.747639	3.7e-15	2.46e-14	22549.6	23454.7	-0.0567384	0.656315	0.738865	27813.9	24660.3	0.173666	0.0816146	0.135881	24692.5	20734.2	0.252058
Aco008027	76.6595	26.1859	33.1903	49.0012	23.432	34.0572	1111.64	1346.66	1993.94	1463.13	1305.69	1324.82	33.1762	35.0584	24.1824	927.005	563.654	1380.34	2168.49	1813.3	2104.47	1002.26	1287.83	-0.3615	0.368217	0.593071	37733.9	1128.58	5.06323	1.02e-38	2.88e-37	36443.8	1189.74	4.93692	1.04e-22	1.07e-21	35230.8	823.694	5.4181	1.89e-93	3.22e-91	34164.9	865.899	5.30135	7.63e-145	2.06e-142	30332.4	32394.2	-0.0949049
Aco014852	87.5519	103.36	102.897	146.307	133.381	142.927	474.413	463.482	633.795	503.985	412.132	442.836	129.897	154.754	166.437	319.931	249.386	305.914	614.243	528.177	604.693	10336.8	7204.61	0.520853	3.59e-06	5.85e-05	34596	6331.45	2.45002	8.26e-45	2.89e-43	31421.5	6677.79	2.23432	9.54e-68	4.61e-66	32302.6	8494.39	1.92706	2.07e-37	6.83e-36	29458.8	8931.29	1.72171	1.95e-59	9.06e-58	26156.2	29706.3	-0.183641
Aco000800	186.21	144.614	104.982	1287.8	701.286	522.543	1074.47	1049.64	1637.28	608.349	757.55	588.179	207.565	479.842	339.504	1434.21	1568.08	2410.47	3625.87	4175.65	5560.68	13814.1	2407.04	2.52086	1.15e-14	1.18e-12	18626.8	2113.45	3.13981	3.79e-32	7.98e-31	10167.4	2227.81	2.19038	9.31e-24	1.01e-22	17391.7	11359	0.614575	0.178355	0.263402	9529.25	11939.1	-0.325247	0.432614	0.54506	8457.81	15993.7	-0.919173
Aco030281	1581.11	1576.64	1538.68	1667.95	1667.92	1559.13	2528.68	2651.68	2408.95	2198.11	2440.81	2611.15	1610.55	1724.07	1408.05	2830.7	2479.24	2290.75	3844.69	2956.6	2894.21	16661	16030.6	0.0556043	0.515027	0.718067	23232.2	14082.8	0.722184	2.52e-14	1.9e-13	23339.9	14851.6	0.652163	1.01e-09	4.46e-09	21692.8	13692.7	0.663844	9.98e-11	6.29e-10	21873.5	14396.8	0.603448	2.33e-09	1.13e-08	19415.7	19948.4	-0.0390643
Aco010737	978.394	1311.49	1076.66	1597.94	1575.59	1602.07	1819.98	2144.26	1331.56	973.103	1014.4	1017.73	729.051	748.757	760.446	592.961	637.64	495.482	897.404	784.24	615.434	33353.5	23568.7	0.500993	0.000207178	0.00189559	33250.5	20719.8	0.682365	0.00138241	0.00335657	19848.3	21849.4	-0.138553	0.315319	0.420761	31047.7	27408.9	0.17982	0.291431	0.392667	18603.6	28819.1	-0.631464	1.41e-16	1.19e-15	16514.2	28548.3	-0.789671
Aco004667	3.02357	18.5859	5.58465	81.6257	115.157	94.9238	1502.11	1516.01	1561.53	1742.13	1820.13	1879.1	113.029	156.965	168.792	1145.75	1131.41	901.228	767.608	612.352	622.084	3105.77	289.578	3.42334	1.08e-05	0.00015287	43847.1	255.464	7.4237	4.55e-22	5.65e-21	54769.7	269.197	7.66905	1.72e-23	1.84e-22	40941.5	2552.35	4.00404	5.37e-164	3.37e-161	51333.8	2683.87	4.25796	6.93e-222	5.69e-219	45568.4	37650.3	0.275356
Aco006590	5.45323	12.7612	4.62191	5.52606	3.09907	2.80142	1975.45	2103.52	2659.99	1337.21	1218.8	818.449	1.61792	0.567428	1.29583	140.998	48.7013	119.442	2818.98	2327.64	1962.02	108.239	216.797	-1.0009	0.0286926	0.102838	57459.9	190.92	8.23569	1.51e-119	3.27e-117	30214.6	201.191	7.23153	1.02e-42	2.43e-41	53650.5	88.9865	9.23636	0	0	28332.2	93.5376	8.24282	2.75e-106	3.81e-104	25154.9	49335.3	-0.971769
Aco023992	561.179	841.895	672.384	312.947	538.55	500.946	331.437	344.481	212.795	371.721	357.842	449.844	525.998	548.524	525.682	389.956	322.941	298.777	453.308	403.737	257.949	21169.8	32545.7	-0.620463	0.00811492	0.0387844	12501.6	28618.7	-1.19488	4.94e-07	1.9e-06	17454.2	30179.4	-0.789999	1.19e-05	3.55e-05	11673.7	17393.8	-0.575338	0.0126968	0.0264026	16358.6	18292	-0.16117	0.392415	0.505355	14522	10735.2	0.435942
Aco024996	86.9775	123.659	110.749	188.032	167.654	155.765	1216.47	1079.83	977.666	822.454	907.177	874.191	208.522	208.146	255.085	1198.92	874.098	879.635	1494.08	1233.85	1004.42	5651.35	3559.07	0.667118	4.4e-05	0.000511517	32539.2	3129.08	3.37843	5.8e-81	5.85e-79	27210.3	3300.1	3.04366	3.58e-87	2.69e-85	30384.2	4644.8	2.70967	5.03e-90	7.87e-88	25502.8	4883.42	2.38479	3.15e-113	5.1e-111	22637.5	27944.9	-0.30384
Aco013290	0.0282377	0.0463666	0.0129766	0.0481074	0.0372211	0	1241.67	1240.95	807.513	816.496	1185.94	1108.51	0	0	0	48.4535	5.17107	21.4307	554.582	381.047	248.4	1.87059	1.92468	-0.0510821	0.977604	1	64831.1	1.69374	15.2721	9.19e-130	2.61e-127	64510.8	1.78438	15.1891	1.32e-133	2.57e-131	60538	1.53965	15.3517	2.92e-115	7.41e-113	60444.3	1.61792	15.2785	3.16e-117	5.4e-115	53640.4	55672.7	-0.0536425
Aco028174	0.0210273	0	0	0	0	0	1001.98	1208.45	1038.18	937.203	817.34	912.306	0.069456	0.255773	0.429862	1086.39	430.541	521.98	877.876	1008.87	869.486	NA	NA	NA	NA	NA	42993.2	0.272755	17.1599	2.64e-47	1.02e-45	37103.9	0.287195	16.8706	4.85e-46	1.27e-44	40143.6	0	17.9332	1.15e-51	6.58e-50	34782.4	0	17.654	2.3e-50	8.3e-49	30880.8	36911.3	-0.257361
Aco009679	102.173	154.42	114.881	120.588	80.0178	97.6165	745.875	1008.63	1495.97	1093.93	974.838	1082.58	97.071	109.516	97.9924	974.36	646.199	704.23	677.663	985.602	780.54	3759.63	4695.02	-0.320336	0.12816	0.301655	36891.6	4128.77	3.15958	9.43e-30	1.77e-28	37574.3	4353.57	3.1096	1.14e-72	6.33e-71	34443.7	3089.68	3.47864	4.48e-48	2.23e-46	35222.4	3248.28	3.43849	2.49e-121	4.68e-119	31270.8	31668.3	-0.0182544
Aco011478	325.157	416.225	401.518	519.636	377.596	392.923	675.746	637.927	712.505	502.309	417.733	436.39	409.633	387.75	395.466	605.318	398.293	518.82	1064.92	845.041	829.633	15843.5	14070.9	0.171196	0.314541	0.539915	22389.9	12367.8	0.856287	2.61e-09	1.27e-08	15748.8	13044.3	0.271842	0.0546568	0.0925181	20906.3	13021.6	0.68302	5.84e-06	2.15e-05	14765.1	13689.9	0.109066	0.444486	0.556525	13109.6	19226.7	-0.552489
Aco008300	156.997	168.5	157.834	193.937	217.157	212.591	553.521	512.216	512.461	547.709	582.892	562.995	248.431	291.091	305.969	532.318	459.112	452.947	666.712	601.157	537.147	10312.1	8012.67	0.363985	0.000241395	0.00215137	23470.1	7040.34	1.73714	2.77e-65	1.92e-63	26477.3	7424.56	1.83444	1.02e-95	9.38e-94	21915.2	8473.93	1.37085	6.63e-37	2.14e-35	24816.9	8910.27	1.47783	3.15e-60	1.5e-58	22029.4	20155	0.128312
Aco015462	841.164	908.786	844.189	747.75	978.035	889.487	243.606	278.367	206.959	330.743	338.357	363.179	596.15	728.382	604.181	199.708	257.459	205.355	333.446	284.774	304.952	32302	32121.8	0.00805673	0.951916	0.979377	8093.68	28224.4	-1.80213	2.13e-34	4.96e-33	12055	29764.5	-1.30399	1.79e-42	4.21e-41	7557.42	26544.3	-1.81247	4.38e-31	1.11e-29	11298.7	27912.1	-1.30473	4.62e-27	6.99e-26	10029.9	6949.21	0.529444
novel.401	457.009	541.666	486.86	887.456	881.735	811.678	1470.41	1532.82	1596.52	1589.37	1720.18	1484.36	735.945	836.993	770.335	1125.39	1162.87	968.731	1540.05	1365.81	1465.49	15334.7	8848.93	0.793238	6.57e-13	5.36e-11	24584.3	7776.92	1.66054	8.58e-44	2.89e-42	26931.4	8201.33	1.71543	3.03e-48	8.52e-47	22955	12602.9	0.865123	1.58e-16	1.61e-15	25243.8	13250.9	0.929919	1.78e-21	2.02e-20	22408.3	21109.1	0.0861663
Aco013649	0.0616799	0.0482282	0.0809858	0.120093	0.243908	0.0351599	231.18	244.219	202.138	269.47	257.158	245.383	0.0194036	0.336854	1.0702	471.544	333.355	361.969	480.979	453.942	439.188	14.0347	6.72212	1.0437	0.265726	0.48682	21397.5	5.90164	11.8042	6.63e-261	1.7e-257	25631.1	6.22714	11.9867	1.15e-293	1.77e-290	19979.9	11.5468	10.7827	1.9e-64	1.6e-62	24027.3	12.1393	10.9766	1.12e-66	6.34e-65	21330.8	18373.2	0.215382
Aco019706	295.237	340.014	312.702	613.56	591.735	505.094	1297.26	1762.13	1348.12	875.466	1112.15	929.792	210.552	191.714	186.743	214.858	186.361	225.242	85.0463	79.6129	82.1979	21693.8	12054.3	0.847722	6.74e-12	4.48e-10	50263.7	10593.2	2.2464	2.65e-43	8.75e-42	34995.8	11171.4	1.6474	1.27e-34	2.22e-33	46931.7	17830.8	1.39622	1.75e-19	2.25e-18	32797.1	18747	0.806961	2.61e-10	1.36e-09	29108.8	43148.5	-0.56785
Aco018378	264.275	328.99	284.677	256.532	276.167	314.04	556.312	524.049	451.495	446.068	494.031	513.763	422.739	465.19	496.402	454.401	520.087	505.037	570.497	508.598	506.036	12449.6	12940.5	-0.0557158	0.684482	0.832906	20256.1	11374.2	0.832596	2.47e-08	1.1e-07	20217.6	11994.7	0.753243	5.89e-09	2.44e-08	18914.4	10229	0.886743	4.32e-11	2.82e-10	18947.8	10756	0.816792	4.05e-13	2.68e-12	16818.8	17395.1	-0.0485774
Aco011916	49.2097	58.0379	59.1148	88.0547	93.8035	85.4941	524.372	500.871	556.913	400.146	403.082	470.262	65.7181	83.0048	91.0546	362.146	290.205	310.819	428.391	433.056	442.449	6538.54	4078.25	0.680882	7.42e-09	2.53e-07	34807.7	3583.95	3.27979	1.05e-144	3.91e-142	29454.2	3780.1	2.96195	1.99e-114	2.81e-112	32501.2	5373.59	2.59669	3.79e-127	1.22e-124	27605.3	5650.04	2.28873	5.75e-105	7.54e-103	24505.3	29889.8	-0.286595
Aco014722	388.804	456.384	488.336	900.909	880.68	823.915	399.253	439.115	365.303	404.473	399.483	389.011	427.658	484.518	475.334	454.372	456.01	438	535.046	443.366	417.443	32755.8	16804.7	0.962859	2.61e-15	3.16e-13	13608.2	14767.4	-0.117969	0.41248	0.532322	14180.1	15576.5	-0.135513	0.256356	0.354179	12706.5	26920.3	-1.08315	1.61e-20	2.23e-19	13292	28304.5	-1.09042	6.06e-39	1.51e-37	11799.9	11684.3	0.0142541
Aco006606	270.221	315.051	248.966	233.947	302.956	283.605	479.527	513.966	505.853	759.903	804.7	687.627	340.917	400.256	355.318	725.316	637.076	762.982	983.746	765.263	925.19	9633.64	9819.66	-0.0275806	0.857246	0.931924	15831.3	8630.23	0.875397	1.2e-10	6.71e-10	24996.6	9099.77	1.45792	4.32e-28	5.75e-27	14782.1	7916.26	0.901035	9.9e-12	6.87e-11	23431.1	8324.23	1.49312	6.22e-33	1.22e-31	20799.6	13593.2	0.613685
Aco009508	317.568	409.222	644.607	187.519	219.272	379.126	28.6584	20.68	23.1768	17.6016	16.5626	16.2572	1198.59	802.399	1173.96	34.5133	74.8508	48.4245	62.7686	40.7461	38.2538	16181.2	28289.6	-0.805927	0.00982359	0.0451323	1343.41	24858.9	-4.20991	3.78e-54	1.83e-52	981.599	26235.7	-4.74023	4.67e-86	3.43e-84	1254.46	13288	-3.40518	1.28e-44	5.65e-43	920.175	13975.1	-3.92483	4.59e-73	3.05e-71	816.914	1153.94	-0.49781
Aco007419	578.844	679.125	670.847	1016.58	947.313	907.19	406.288	438.345	391.509	467.717	498.419	419.952	782.803	796.656	619.943	342.718	418.172	360.067	392.044	355.573	434.021	30407.1	20479	0.570255	3.18e-07	7.21e-06	11774.7	17996.9	-0.612068	5.65e-07	2.15e-06	13879.6	18981.1	-0.451559	0.000213278	0.000542244	10994.5	24990	-1.18458	1.72e-27	3.6e-26	13010.3	26274.6	-1.01395	6.34e-23	7.77e-22	11549.1	10110.1	0.192052
Aco007552	92.3427	120.769	112.898	125.446	141.279	172.978	634.728	578.534	702.353	799.498	852.156	804.874	121.61	118.866	138.679	188.188	179.233	244.403	293.35	273.614	310.133	8656.36	6432.94	0.428379	0.0111925	0.0498213	33931.5	5654.66	2.58515	3.08e-60	1.82e-58	45731.1	5963.81	2.93891	1.8e-109	2.26e-107	31683	7111.58	2.15538	1.85e-45	8.37e-44	42863.8	7478.35	2.51884	5.65e-86	4.97e-84	38049.3	29138.2	0.38494
Aco013935	426.745	514.784	478.704	694.956	1056.13	823	443.909	577.338	450.46	728.071	708.497	635.572	564.788	713.751	586.307	519.175	588.486	492.606	416.385	367.989	442.73	26073.9	14416.3	0.854875	1.61e-06	2.95e-05	13399.5	12670.1	0.0807583	0.613117	0.712735	19835	13362.2	0.569939	1.61e-06	5.27e-06	12511.3	21428.4	-0.776254	1.77e-05	6.09e-05	18594.2	22532.8	-0.277108	0.0706066	0.119758	16507.2	11503.2	0.521089
Aco000352	103.789	107.404	98.2007	95.4421	122.364	106.493	667.484	752.068	648.648	978.054	976.036	873.499	154.089	173.368	173.347	606.132	459.443	499.481	751.918	705.94	677.818	4369.3	4179.45	0.0639337	0.630908	0.799292	25054.2	3672.02	2.77049	4.08e-126	1.04e-123	36008.5	3872.23	3.21724	7.72e-231	4.67e-228	23393.9	3590.68	2.70401	3.32e-88	4.85e-86	33754.8	3775.64	3.1606	1.86e-155	6.25e-153	29965.5	21511.4	0.478226
Aco000395	552.432	750.038	642.802	965.501	963.366	892.372	1298.02	1467.72	999.967	1457.91	1619.75	1493.39	702.348	669.273	645.818	654.357	629.865	576.95	897.505	811.389	650.316	18613.2	12863.2	0.533085	0.000137181	0.00133013	22336.3	11308.4	0.981999	5.25e-07	2.01e-06	28517.8	11925.6	1.25784	1.31e-18	1.07e-17	20856.6	15297.2	0.447224	0.0039019	0.00907207	26728.8	16083.8	0.732844	9.53e-16	7.67e-15	23725.7	19178.2	0.307018
Aco004365	1.87745	2.74852	1.8711	29.8787	33.3941	18.6386	934.475	994.356	879.233	694.215	732.389	727.05	4.83169	20.7145	23.1754	856.451	721.604	711.94	645.341	901.332	719.476	1120.87	89.0892	3.65544	1.48e-39	3.06e-36	34548.3	78.3433	8.79124	0	0	27860.6	82.5996	8.40565	0	0	32259.1	921.572	5.13067	6.19e-146	3.29e-143	26113.2	968.868	4.75376	3.38e-148	9.87e-146	23180.2	29664.7	-0.355843
Aco004993	1493.55	976.346	2499.59	253.576	291.701	391.999	35.7684	48.6336	116.858	103.131	43.0093	41.695	734.825	620.854	657.272	224.671	271.018	447.37	60.1343	40.5278	136.653	10627.1	56488.4	-2.41019	1.08e-14	1.12e-12	2055.23	49576.1	-4.59219	5.76e-12	3.58e-11	2009.77	52333.2	-4.70259	6.63e-15	4.34e-14	1918.76	8729.61	-2.18564	0.000144274	0.000434146	1886.17	9180.19	-2.28302	5.32e-06	1.81e-05	1675.93	1764.19	-0.0741008
Aco014555	437.395	525.887	515.609	678.09	786.594	732.785	764.233	893.062	907.479	998.759	1089.06	917.198	707.571	828.351	805.207	745.951	765.659	705.384	805.331	650.77	787.018	16776.5	11316.6	0.567972	3.98e-06	6.43e-05	17610.7	9945.51	0.824372	4.19e-09	2e-08	21688.7	10489.5	1.04804	1.28e-16	9.37e-16	16443.3	13786.6	0.254307	0.0416138	0.0757914	20329.8	14496.4	0.487978	6.14e-06	2.07e-05	18046.1	15119.7	0.255248
Aco013530	258.716	299.683	252.339	264.141	319.292	290.712	356.491	354.098	309.305	330.139	347.483	376.391	227.732	236.043	230.305	403.575	352.939	363.128	369.955	325.733	326.73	16180.1	15044.2	0.105005	0.416133	0.636032	16975.3	13221.4	0.36057	0.0067129	0.0143711	18448.2	13941.7	0.404092	0.000751221	0.00177627	15850.7	13296.5	0.253516	0.044336	0.0801533	17290.1	13981.3	0.306487	0.00530277	0.0116082	15348	14576.8	0.074396
Aco016000	478.812	521.52	544.904	436.25	429.886	422.381	1303.45	1561.42	1577.06	1483.02	1594.16	1473.08	684.185	715.633	739.427	1524.33	1311.64	1479.94	1299.4	1484.63	1512.14	6988.19	8402.18	-0.265909	0.00521614	0.0272079	21669.4	7382.5	1.55349	1.78e-31	3.63e-30	23335.5	7786.48	1.58347	8.59e-56	3e-54	20232.9	5742.91	1.8169	8.01e-52	4.61e-50	21872.4	6038.31	1.85696	6.73e-110	9.95e-108	19415.6	18603.9	0.0615831
Aco004354	1281.5	1648.7	1583.34	1152.08	2941.09	2091.52	52.3136	71.8763	173.545	78.3393	87.992	133.837	3243.43	2470.85	2858.12	861.13	1591.79	391.328	51.0594	53.4299	39.4953	30116.7	22013.7	0.452145	0.124401	0.295252	1304.8	19349.5	-3.89	1.18e-23	1.59e-22	1382.26	20407.9	-3.88449	5.3e-71	2.82e-69	1218.16	24748.6	-4.34443	4.17e-11	2.73e-10	1295.08	26027.8	-4.32905	9.35e-23	1.14e-21	1149.5	1120.02	0.0372298
Aco016110	63.2212	86.103	68.1101	160.872	119.356	122.087	925.504	1100.88	815.504	778.118	830.398	922.822	60.8404	58.6226	56.6643	486.237	277.661	265.974	762.149	671.342	405.922	5797.94	3141.65	0.884173	9.28e-07	1.83e-05	36833	2762.05	3.73732	7.71e-92	1.01e-89	34510.9	2912.52	3.5669	3.51e-118	5.42e-116	34392.3	4765.32	2.8514	4.12e-66	3.61e-64	32343.4	5009.89	2.69057	1.24e-84	1.05e-82	28710	31623.3	-0.139434
Aco000816	278.104	313.643	329.733	347.722	418.594	341.098	269.306	244.161	260.901	317.568	321.908	317.297	322.458	348.221	371.34	305.887	312.99	316.311	498.222	401.864	430.017	18414	15357.4	0.261786	0.05002	0.154798	11580.9	13494.6	-0.220651	0.0682435	0.116458	15040	14233.4	0.0795063	0.447255	0.55868	10813.6	15134.1	-0.484874	0.000163474	0.000486631	14097.4	15912.9	-0.174655	0.111543	0.178095	12514.5	9945.2	0.331544
Aco001457	140.559	71.9316	93.0922	132.663	128.938	107.977	239.397	233.873	481.84	549.87	414.118	534.37	247.152	327.125	383.139	449.637	479.793	464.985	615.383	458.413	735.776	5969.81	4956.48	0.268289	0.270299	0.49139	13890.3	4347.6	1.67579	8.83e-07	3.29e-06	22878.9	4584.56	2.31911	9.65e-22	9.42e-21	12968.8	4906.84	1.40228	3.15e-08	1.54e-07	21449.1	5158.94	2.0559	3.02e-49	1.04e-47	19045.3	11926.2	0.675274
Aco011968	589.741	342.981	360.082	189.616	275.912	334.185	1191.94	1104.6	930.886	1132.28	1654.28	1235.25	383.417	333.178	386.631	657.005	456.601	423.522	782.012	768.478	748.906	6734.83	10931	-0.698677	0.00951906	0.0440759	24440.7	9590.79	1.34955	1.55e-08	7.01e-08	32033.5	10112	1.66351	4.25e-12	2.3e-11	22822	5532.3	2.04439	1.76e-24	3.13e-23	30018	5818.15	2.36714	6.72e-32	1.27e-30	26639	20989.1	0.343934
Aco018440	144.064	105.506	139.485	165.22	126.901	143.821	943.313	894.676	734.646	732.127	604.068	783.531	79.0249	87.3481	82.2001	402.743	290.708	274.912	685.108	694.458	503.89	6236.79	5585.15	0.159195	0.354377	0.579367	33106.3	4902.95	2.75529	1.73e-54	8.52e-53	28680.1	5171.55	2.47127	1.58e-49	4.63e-48	30913.7	5125.36	2.59241	2.36e-67	2.15e-65	26884.4	5388.67	2.31864	4.2e-64	2.25e-62	23869.4	28430.3	-0.252266
Aco005712	36.164	40.4055	37.4223	116.579	97.9391	75.2029	509.175	466.676	471.078	346.403	371.196	423.809	40.3769	47.4131	46.573	343.145	248.748	197.93	567.102	594.416	474.398	6360.93	2509.48	1.3418	4.81e-14	4.7e-12	28577.1	2205.16	3.69606	2.09e-248	3.44e-245	23704.2	2325.52	3.34961	4.22e-163	1.31e-160	26684	5229.13	2.35145	6.79e-45	3e-43	22214.9	5497.3	2.01485	4.5e-36	1.01e-34	19719.2	24540.9	-0.315607
Aco011527	34.6771	52.2542	53.8805	45.4179	40.7267	61.1053	295.736	240.76	272.435	334.616	250.381	299.45	45.1968	47.3091	52.8574	225.009	161.413	196.696	377.852	365.312	329.846	4639.96	4446.54	0.0615933	0.78058	0.889974	22937.4	3909.4	2.55268	6.27e-36	1.57e-34	26348.4	4123.92	2.67562	2.51e-41	5.74e-40	21418.2	3811.54	2.49008	3.12e-48	1.56e-46	24703.5	4008.03	2.62342	4.43e-57	1.93e-55	21935.4	19699.8	0.155086
Aco006698	196.106	301.931	253.505	232.672	224.513	243.209	751.631	812.255	756.622	772.402	913.065	1028.2	269.281	287.864	271.124	894.742	848.082	876.727	1425.35	1300.74	1072.15	5943.26	6390.77	-0.104639	0.540379	0.737379	17711.2	5619.77	1.65614	1.66e-19	1.77e-18	21785.4	5926.66	1.8781	7.92e-23	8.23e-22	16537.5	4883.72	1.75957	2.84e-67	2.58e-65	20414.4	5135.06	1.99102	6.67e-59	3.04e-57	18119.5	15207.3	0.252743
Aco024209	32.9576	50.8046	28.5367	74.3942	87.1701	77.6122	829.391	889.733	498.902	768.333	917.304	1031.17	41.9789	44.8929	41.5817	259.38	173.574	199.84	484.375	452.971	294.579	4110.13	1934.15	1.08775	1.02e-06	1.97e-05	34257.4	1701.23	4.33197	2.65e-51	1.19e-49	44161.3	1793.32	4.62241	2.41e-91	1.99e-89	31988.8	3377.76	3.24349	2.27e-57	1.58e-55	41381.8	3551.65	3.54262	5.06e-159	1.84e-156	36729.5	29416.2	0.320345
Aco009009	1571.33	1914.88	1865.98	2074.52	1850.62	1946.43	729.135	801.8	405.97	419.958	566.533	535.944	459.634	428.04	380.41	590.109	574.266	507.221	300.501	298.796	197.546	34497.9	31525.1	0.130023	0.273711	0.495024	10229.5	27706.5	-1.43753	1.97e-08	8.81e-08	8463.07	29221.8	-1.78782	7.39e-30	1.06e-28	9552.15	28350	-1.56952	7.35e-13	5.61e-12	7930.19	29807.6	-1.9103	2.33e-49	8.08e-48	7037.96	8783.73	-0.319614
Aco017105	200.124	261.759	224.053	244.06	316.315	299.146	248.175	288.447	217.451	191.583	248.379	206.358	172.165	163.364	120.905	120.054	122.557	105.411	220.642	187.007	197.116	21897.2	17513.4	0.322292	0.0400822	0.131576	17270.5	15395.3	0.165827	0.328993	0.444583	15570.5	16235.2	-0.0602811	0.702216	0.778589	16126.2	17993.4	-0.158068	0.304844	0.407083	14591.9	18920.8	-0.374765	0.00741327	0.0158127	12950.7	14828.1	-0.195264
Aco022207	435.376	501.66	552.282	468.918	472.031	563.605	274.53	249.179	308.356	331.242	318.067	319.59	574.123	582.641	668.806	555.936	590.451	781.794	574.57	389.32	659.944	15736.6	15615.6	0.0111712	0.936301	0.971457	7830.92	13721.8	-0.809174	1.23e-07	5.04e-07	9582.12	14474	-0.595066	9.25e-07	3.11e-06	7311.99	12929.5	-0.822322	2.08e-09	1.16e-08	8982.13	13595.6	-0.598096	1.09e-08	4.96e-08	7973.98	6724.71	0.245748
Aco012799	71.2224	80.253	63.3355	127.535	122.94	122.351	207.455	192.213	162.384	157.592	158.266	149.278	83.9122	91.6051	80.3966	257.379	208.737	195.453	226.639	228.396	243.427	12972.8	7495.7	0.791465	1.18e-10	6.07e-09	17588.9	6587.27	1.41695	5.19e-19	5.38e-18	15302.8	6945.53	1.13977	1.34e-20	1.22e-19	16424	10661.1	0.623407	8.34e-07	3.44e-06	14344.4	11209.4	0.355827	9.49e-06	3.14e-05	12734	15104.9	-0.246261
Aco012527	333.179	441.177	400.212	790.491	665.296	640.873	1063.37	1315.78	975.013	932.36	1051.52	988.755	781.524	738.072	796.756	1144.28	997.556	978.272	1188.83	1127.24	961.787	12827.3	7203.27	0.832518	3.63e-08	1.05e-06	18452.9	6332.05	1.54312	3.15e-18	3.12e-17	17200.9	6678.03	1.36503	1e-22	1.04e-21	17230	10542.6	0.708679	3.39e-06	1.29e-05	16121.3	11084.1	0.540492	1.95e-06	6.97e-06	14309.8	15842.3	-0.146753
Aco003317	141.218	110.169	130.797	131.41	136.764	110.491	321.27	351.225	344.646	357.443	391.24	328.838	123.001	111.75	127.108	690.764	433.3	642.102	918.843	679.878	559.153	5905.87	5979.28	-0.0180383	0.904932	0.95707	14267.6	5249.72	1.44237	1.1e-25	1.66e-24	15888.2	5536.81	1.52076	9.87e-29	1.34e-27	13322	4854.29	1.45672	2.48e-30	6.11e-29	14892.6	5103.78	1.54524	2.06e-37	4.85e-36	13219.7	12250.3	0.109886
Aco030435	87.6533	159.375	88.6921	235.087	283.692	224.212	661.85	744.72	609.678	482.772	576.992	639.669	236.848	281.477	305.215	733.679	634.528	613.852	870.507	855.365	771.898	8319.23	3765.96	1.14353	3.4e-06	5.58e-05	20297.2	3313.67	2.61493	2.06e-24	2.89e-23	17997.5	3493.19	2.36532	1.06e-21	1.03e-20	18952.3	6837.6	1.47095	2.76e-25	5.14e-24	16864.9	7189.42	1.2302	2.43e-18	2.26e-17	14968.8	17427.3	-0.219402
Aco021854	82.5419	110.332	71.9553	84.6711	105.565	94.9412	401.559	400.63	412.835	208.815	318.106	261.892	150.046	91.364	117.652	465.522	335.536	336.039	580.244	547.974	646.874	5499.38	5119.3	0.103383	0.581275	0.766838	21072.8	4501.01	2.22721	3.96e-33	8.69e-32	14388.8	4745.15	1.60052	6.11e-14	3.75e-13	19676.5	4519.29	2.12248	3.24e-67	2.92e-65	13482	4752.07	1.50451	5.88e-21	6.43e-20	11964	18094.9	-0.596886
Aco021762	446.988	514.049	499.796	567.108	829.411	634.012	1478.66	1637.37	1605.83	1727.94	1928.09	1788.73	298.155	351.54	337.732	978.079	842.931	896.611	1208.17	1001.58	1128.01	11123.1	8019.73	0.471835	0.00522766	0.0272611	23257.2	7047.48	1.72254	6.04e-50	2.55e-48	28195.2	7432.68	1.92352	7.85e-71	4.15e-69	21715.8	9141.62	1.24834	5.74e-15	5.21e-14	26426.2	9612.6	1.45911	2.21e-23	2.77e-22	23457	19968.6	0.232268
Aco015312	249.318	327.2	318.089	397.957	336.032	434.704	390.584	501.431	445.752	429.091	395.233	375.459	317.805	298.866	297.706	249.015	244.931	227.936	314.164	309.55	311.877	17333.1	13300.6	0.382097	0.015522	0.0640709	17847	11691.3	0.610266	0.000292554	0.000789989	16824.6	12331.1	0.448294	0.00148315	0.00335587	16663.9	14241.4	0.22658	0.122172	0.192308	15772.6	14974.4	0.0748435	0.529288	0.631127	14003	15321.4	-0.129814
Aco021826	170.932	173.132	161.781	160.075	196.65	193.25	415.623	393.564	484.216	491.938	479.723	489.688	216.629	241.745	216.308	614.543	488.503	687.412	1138.72	855.059	971.715	6355.94	5861.96	0.11672	0.348677	0.573542	13447.1	5149.97	1.38476	4.86e-26	7.45e-25	15966.4	5430.84	1.55587	1.17e-78	7.38e-77	12556	5222.73	1.26557	3.15e-19	4.01e-18	14966.2	5491.86	1.4464	2.69e-40	6.98e-39	13286.1	11547.1	0.202324
Aco014226	86.66	320.275	174.957	617.195	359.121	334.006	488.247	644.54	781.694	395.688	372.109	392.705	576.72	593.529	371.875	2274.38	1591.29	1372.11	1485.1	1478.13	1045.56	8778.91	3903.39	1.16934	0.0456438	0.144843	11544.6	3438.94	1.74726	1.45e-05	4.71e-05	7354.11	3625.81	1.02029	0.0447639	0.0774649	10778.8	7217.05	0.578758	0.0176273	0.0353343	6893.57	7586.36	-0.138162	0.494405	0.602608	6119.92	9910.34	-0.695525
Aco015226	205.424	227.451	208.358	296.974	443.25	349.987	470.323	496.302	474.947	521.516	526.107	515.168	250.567	298.244	287.885	474.445	457.432	434.982	531.736	470.909	457.497	13896.7	8192.71	0.762276	6.28e-06	9.53e-05	16521.8	7199.09	1.19855	1.9e-31	3.85e-30	18828.9	7591.88	1.3105	9.28e-48	2.55e-46	15426.9	11420.7	0.433889	0.00660148	0.0146321	17649.1	12009.3	0.555553	0.00013348	0.000378542	15667.5	14186.3	0.143281
Aco004999	806.128	968.695	899.617	772.833	957.136	847.993	686.714	697.327	682.312	980.916	993.286	817.958	777.853	775.732	811.197	468.74	526.449	574.026	727.39	612.883	786.347	16436	17090.3	-0.0563629	0.670327	0.824224	11847.7	15020.1	-0.342273	0.00361161	0.00814763	16825.2	15840.5	0.0870549	0.504944	0.611874	11062.6	13507	-0.287954	0.0174732	0.035065	15772.7	14202.6	0.151377	0.221621	0.318304	14002	10173.3	0.460903
Aco011763	2.79004	4.44689	4.16447	4.51244	3.11865	5.61104	833.989	591.555	406.563	576.583	793.546	639.828	13.6887	10.2783	6.46867	252.765	86.359	94.0811	1545.86	1167.77	1009.73	183.506	158.363	0.215943	0.491206	0.699097	22839.8	139.257	7.35804	1.97e-140	6.49e-138	26357.3	146.884	7.48814	2.39e-291	3.44e-288	21328.8	150.737	7.1403	2.11e-164	1.36e-161	24699.6	158.501	7.27613	0	0	21920.4	19621	0.159917
Aco024230	229.213	240.479	321.658	183.42	204.966	221.986	148.684	135.991	169.933	115.755	121.779	136.731	321.135	315.78	355.942	171.198	188.68	199.69	136.696	120.495	143.533	14266.6	18539.9	-0.378008	0.0225735	0.0855857	9560.38	16287	-0.768579	2.27e-05	7.18e-05	8273.52	17183.4	-1.05451	1.28e-10	6.14e-10	8926.82	11722.3	-0.393001	0.00408683	0.00944842	7753.97	12326.3	-0.668843	5.83e-09	2.72e-08	6882.99	8209.78	-0.254439
novel.104	1284.67	1396.96	993.438	1407.4	635.596	665.304	839.256	960.909	259.012	682.115	531.833	218.542	736.165	739.964	525.239	454.42	432.372	500.369	435.303	757.702	330.106	17981.6	24487.5	-0.445514	0.136796	0.315496	12289.1	21518.8	-0.80825	0.0443621	0.0794543	8984.05	22686.3	-1.33633	7.55e-05	0.000203253	11475.7	14783.1	-0.365387	0.571305	0.664154	8428.37	15538.4	-0.882498	0.124902	0.196189	7484.93	10552.1	-0.495455
Aco019775	121.547	144.703	141.353	266.227	257.709	233.907	422.934	407.252	403.255	515.143	479.774	460.28	240.486	282.788	338.288	491.86	481.637	559.47	682.526	640.57	680.669	9388.32	5061.83	0.891154	6.89e-14	6.58e-12	13744.3	4448.48	1.62747	4.61e-42	1.46e-40	17041.9	4691.73	1.86095	5.14e-59	1.98e-57	12833.7	7716.04	0.734076	1.15e-11	7.9e-11	15976	8112.67	0.977793	1.65e-23	2.08e-22	14183.4	11802.5	0.265158
Aco025049	248.423	199.712	199.276	257.067	213.284	182.687	682.259	711.955	589.032	798.669	857.88	903.484	200.265	196.622	222.679	721.408	552.978	601.426	1341.18	1017.99	868.972	5836.75	5806.38	0.00746023	0.965592	0.98626	15942.1	5098.39	1.6447	3.72e-27	6.06e-26	21641.8	5376.2	2.00914	7.39e-52	2.3e-50	14885.9	4797.75	1.63358	1.52e-25	2.9e-24	20283.1	5043.94	2.00776	3.97e-49	1.36e-47	18004.6	13689	0.395378
Aco001766	59.4958	86.8126	67.4078	192.542	220.331	177.01	1275.08	1485.84	718.147	779.702	818.595	907.071	143.341	179.925	144.308	786.472	554.678	479.825	1335.15	875.292	731.397	5234.93	1900.56	1.46185	1.09e-16	1.61e-14	27744	1671.17	4.05334	1.83e-47	7.1e-46	21024.8	1762.23	3.57691	1.45e-102	1.6e-100	25906.7	4302.64	2.59009	2.77e-29	6.38e-28	19704.7	4523.95	2.12318	1.68e-71	1.07e-69	17491.4	23821.3	-0.445585
Aco022494	58.6401	83.4543	73.4681	125.483	88.8066	112.647	66.9019	55.1095	78.5226	45.8387	34.9497	38.8636	60.4848	56.1465	47.3941	32.2651	29.2784	29.7034	46.6454	56.4074	57.3516	24668.4	16305.3	0.597368	0.00114202	0.00786817	13620.7	14335.5	-0.0737548	0.712742	0.793525	8535.44	15118.7	-0.824771	1.58e-06	5.19e-06	12718.1	20270.9	-0.672528	0.000140732	0.000424026	8002.84	21312.4	-1.41315	6.33e-21	6.91e-20	7106.08	11697.4	-0.719091
Aco001003	209.168	224.977	198.496	266.538	305.385	325.334	443.935	442.276	401.086	476.26	476.763	510.784	264.183	312.286	283.521	535.802	447.816	448.563	687.787	577.471	509.829	10656.9	7534.62	0.500272	4.8e-05	0.000552657	13750.6	6620.49	1.05453	2.31e-20	2.58e-19	16440	6981.3	1.23571	4.53e-35	8.1e-34	12839.6	8756.42	0.55213	6.75e-06	2.46e-05	15409.1	9207.64	0.74282	2.8e-12	1.74e-11	13678.9	11807.6	0.212257
novel.188	0	0.18398	0	0	0	0.0838297	1353.25	1759.03	1098.59	1217.98	1201.7	1054.07	0.0925256	0.40157	0.303162	1624.02	725.8	842.31	1098.73	1172.45	1132.34	0.616672	1.35395	-1.09607	0.773351	1	27877.7	1.19839	14.6362	1.49e-83	1.64e-81	24184.9	1.2613	14.3589	1.2e-85	8.8e-84	26030.4	0.505156	15.4636	4.33e-50	2.32e-48	22671.9	0.531673	15.1898	1.56e-49	5.49e-48	20127	23932.8	-0.249822
Aco005981	186.36	197.402	195.392	218.604	245.522	238.384	168.701	146.467	167.288	165.416	183.238	192.562	201.934	215.687	235.999	295.289	294.276	328.761	393.108	323.313	336.623	13518.3	11173.8	0.27476	0.00428154	0.0232201	8351.6	9817.38	-0.233265	0.0423168	0.0762299	9849.35	10353.8	-0.0721095	0.493178	0.600812	7798.31	11108.7	-0.510421	1.69e-05	5.83e-05	9230.69	11680.7	-0.33964	0.00100282	0.00249411	8193.51	7172.26	0.192
Aco008419	570.738	575.894	588.431	780.114	710.34	697.873	489.435	562.939	485.395	812.804	767.608	822.707	764.38	757.478	762.135	679.782	718.504	734.288	749.661	591.835	573.861	14694.6	11684.1	0.330727	0.000365982	0.00304822	9287.01	10264.5	-0.144402	0.195108	0.28875	15258.9	10825.5	0.495176	1.93e-09	8.34e-09	8671.55	12076.6	-0.477859	4.77e-05	0.000155181	14303.1	12697.4	0.171788	0.0582994	0.101113	12697.8	7973.63	0.67127
Aco028111	182.838	257.968	194.154	317.665	397.89	341.335	630.685	688.201	528.938	550.068	646.955	602.06	339.634	363.958	360.857	408.432	472.661	501.964	935.077	1112.41	749.604	9754.07	5872.59	0.732036	2.17e-05	0.000279066	15331.5	5163.54	1.57014	7.36e-17	6.59e-16	15700.1	5444.6	1.52798	1.26e-20	1.14e-19	14315.8	8016.09	0.83669	1.38e-08	7.04e-08	14714.1	8428.87	0.803914	3.04e-11	1.72e-10	13060.2	13164.2	-0.011398
Aco006198	94.7652	182.373	154.859	133.354	138.855	147.204	864.629	1017.85	968.451	718.744	706.362	819.913	114.154	148.5	162.933	332.12	191.287	262.564	693.476	758.866	704.039	4601.61	4747.36	-0.0449287	0.843579	0.925214	28133.2	4176.32	2.75202	1.31e-29	2.44e-28	23294.3	4404.82	2.40286	7.97e-26	9.54e-25	26268.4	3781.19	2.79635	1.48e-130	5.45e-128	21832.8	3975.88	2.45702	6.52e-129	1.4e-126	19381.5	24153.8	-0.317613
Aco019394	1.45169	1.74918	1.20946	11.6957	8.87932	5.04251	404.855	358.263	447.471	242.697	214.496	266.923	4.54216	4.94537	6.807	316.065	196.258	172.902	293.618	292.18	261.827	758.987	131.037	2.53498	2.87e-15	3.44e-13	32273.3	115.18	8.13452	0	0	20287.9	121.431	7.38902	0	0	30134.8	624.128	5.59433	3.46e-113	8.28e-111	19016.6	656.052	4.85828	3.75e-97	4.19e-95	16882.9	27714.9	-0.715141
Aco005133	685.313	846.965	967.657	612.3	724.305	768.081	509.159	546.027	573.371	494.728	536.128	466.722	729.465	634.06	756.745	747.799	874.47	815.068	686.255	552.14	540.421	13858.8	16496.4	-0.251356	0.127594	0.300838	9645.71	14497.5	-0.58783	0.000321066	0.000861927	9323.3	15293.5	-0.714002	3.63e-06	1.14e-05	9006.4	11387.2	-0.338361	0.00893887	0.0192281	8739.03	11974.1	-0.454349	0.00010901	0.000313438	7757.39	8281.99	-0.094417
Aco007146	130.319	151.426	123.992	153.048	158.182	168.337	351.293	327.253	269.768	347.398	356.88	376.616	247.031	284.975	276.134	441.305	434.764	444.971	643.838	565.073	534.824	6761.71	5736.2	0.237476	0.0496745	0.153984	12024.7	5041.27	1.25417	2.9e-15	2.34e-14	14412.4	5315.76	1.43908	1.1e-33	1.86e-32	11228.3	5556.17	1.01486	3.75e-14	3.19e-13	13508.3	5842.23	1.20913	1.5e-41	4.11e-40	11991.3	10326.5	0.21571
Aco003107	601.595	856.495	762.462	967.906	891.538	1017.61	187.823	236.702	228.717	205.342	190.788	179.854	578.793	492.041	469.675	159.114	207.97	168.662	226.105	201.909	198.83	28562.8	22095.2	0.370432	0.016369	0.0667652	5833.67	19425.9	-1.73544	1.45e-21	1.75e-20	5406.16	20487.5	-1.92201	6.79e-35	1.21e-33	5446.91	23470	-2.10724	4.4e-58	3.2e-56	5068.1	24677.8	-2.28364	1.74e-119	3.14e-117	4499.44	5008.16	-0.154586
Aco005651	8.28395	7.57347	5.15953	29.777	33.3981	31.5114	1367.67	1527.91	1204.85	710.971	889.434	929.217	8.01849	13.9468	16.8218	342.019	167.215	191.104	1080.34	861.514	887.459	965.677	215.068	2.16849	6.44e-25	3.02e-22	37601.2	188.916	7.63886	3.46e-298	1.33e-294	24404.1	199.141	6.93917	1.19e-263	1.14e-260	35109.8	793.575	5.4678	0	0	22868	834.428	4.77684	9.25e-302	1.37e-298	20296.3	32284.9	-0.669645
Aco018423	40.4265	44.0129	34.4979	33.2404	44.6274	30.2304	849.064	817.542	1235.64	1258.2	1382.96	1244.63	79.3315	94.2842	108.796	495.703	357.484	427.222	589.437	472.771	635.866	1064.45	1174.16	-0.142249	0.467897	0.68068	25711.2	1031.78	4.63949	2.2e-109	4.08e-107	36169.1	1087.87	5.05585	0	0	24006.6	874.966	4.77904	4.5e-121	1.31e-118	33901.1	919.984	5.20536	1.16e-269	1.26e-266	30092.6	22077.2	0.446815
Aco018227	422.443	440.362	457.253	551.658	687.575	607.356	289.667	357.071	285.786	355.805	308.907	315.496	514.332	580.517	562.253	333.063	428.271	364.004	372.298	298.878	331.82	18761.9	13445.7	0.4806	7.54e-05	0.000804763	8518.26	11812.9	-0.471754	0.000501937	0.00130608	9412.56	12458.9	-0.404499	7.13e-05	0.000192628	7953.69	15418.5	-0.954939	3.03e-11	2.01e-10	8824.26	16212.5	-0.877481	7.47e-14	5.24e-13	7834.57	7313.13	0.0994039
Aco001453	899.466	915.032	870.046	372.584	555.333	589.201	19.6327	28.0211	36.1678	20.4481	18.9891	24.8809	575.905	500.208	413.017	51.6342	114.326	130.679	19.3894	15.0957	50.5646	20231.1	35893.3	-0.827136	7.56e-06	0.000113041	1005.56	31533.9	-4.97015	7.61e-109	1.4e-106	811.02	33254.5	-5.35867	0	0	938.84	16621.1	-4.14535	5.72e-71	5.72e-69	760.121	17479.3	-4.52382	6.89e-141	1.77e-138	674.8	863.154	-0.356383
Aco021567	0	0	0	0	0	0.128083	1460.43	1360.97	2698.42	4187.88	3099.61	1664.15	1.97917	0	0	802.061	177.924	530.881	2078.09	1124.45	1590.23	0.616672	0	1.87353	0.644022	1	23954.1	0	17.2779	1.01e-45	3.7e-44	40740.1	0	17.9673	1.75e-43	4.28e-42	22365.3	0.505156	15.2584	6.05e-42	2.39e-40	38218	0.531673	15.9645	5.96e-43	1.69e-41	33940.9	20567.9	0.722623
Aco019065	138.235	160.727	147.916	168.929	193.291	199.5	379.361	363.353	378.731	443.536	403.37	420.623	167.945	181.024	193.406	347.29	276.579	317.969	504.723	428.573	455.184	8377.47	6681.4	0.326421	0.00666617	0.0330726	15044.2	5871.68	1.35743	9.01e-34	2.04e-32	17870.8	6192.23	1.52914	4.65e-48	1.29e-46	14047.4	6883.72	1.02903	2.03e-19	2.61e-18	16752.5	7238.36	1.21063	2.78e-32	5.34e-31	14872.9	12918.7	0.203227
Aco023791	91.272	81.3204	75.0517	114.684	134.15	115.059	82.6888	66.7516	77.6076	75.7139	73.2302	94.7028	141.15	132.53	150.425	170.138	201.225	179.764	93.2897	82.78	71.3751	14103.6	9627.23	0.550828	3.31e-05	0.000398687	7915.82	8455.49	-0.0951385	0.519748	0.634054	8930.26	8915.92	0.00225676	0.987899	0.99143	7391.49	11591	-0.649011	1.8e-06	7.14e-06	8369.46	12187.5	-0.542226	4e-05	0.000121905	7429.76	6798.5	0.128028
Aco007919	182.555	182.855	228.722	170.526	183.827	215.441	303.034	319.649	387.922	306.169	291.024	282.289	143.466	183.927	145.756	220.501	206.169	265.647	250.421	215.112	333.242	10432.7	10906.3	-0.0640437	0.671414	0.824921	16648.6	9580.48	0.797224	1.37e-06	5e-06	15224.2	10106.6	0.591013	4.19e-06	1.31e-05	15544.9	8571.55	0.858795	6.69e-09	3.53e-08	14271.4	9013.32	0.662907	3.77e-09	1.78e-08	12669.8	14294.7	-0.174141
Aco021630	276.95	305.07	379.907	344.458	543.462	393.537	219.076	210.056	277.399	213.511	195.907	243.136	396.566	443.614	521.377	293.859	452.146	501.937	219.775	218.059	272.5	16226.4	12203.7	0.410946	0.0457637	0.145179	8046.73	10722.1	-0.414083	0.0252893	0.0479966	7810.68	11311.4	-0.534356	0.000827197	0.00194492	7513.36	13336.2	-0.827694	1.69e-05	5.84e-05	7320.9	14023.4	-0.93771	3.54e-08	1.53e-07	6499.28	6909.58	-0.0884862
Aco007606	45.9041	67.3117	72.0967	275.766	324.323	221.635	1338.91	1414.85	1111.37	1003.85	959.329	1084.46	167.284	248.837	266.815	803.161	688.654	517.039	1065.14	1000.08	659.021	5956.23	1345.47	2.14607	1.89e-23	6.94e-21	25186.7	1182.85	4.41226	6.74e-102	1.09e-99	20884.1	1247.8	4.06488	5.74e-110	7.22e-108	23518.1	4896.19	2.26426	4.77e-41	1.81e-39	19574.9	5147.85	1.92726	1.83e-40	4.77e-39	17377.6	21626.9	-0.315582
Aco013677	894.975	979.384	1014.82	1011.4	1099.39	1156.3	811.741	954.839	1042.72	932.97	903.181	812.609	1048.61	1001.42	1104.17	1039.67	1169.77	1003.68	980.297	935.421	1032.4	13755.6	12195.5	0.173679	0.105759	0.262285	10640.2	10715.6	-0.0101297	0.943488	0.960504	10542.4	11301.9	-0.100315	0.351698	0.460072	9934.76	11303	-0.186085	0.165517	0.247741	9882.97	11885.1	-0.266103	0.00874504	0.01836	8773.76	9135.02	-0.0582606
Aco003428	308.567	334.615	312.17	261.16	274.272	302.634	379.153	433.408	379.78	386.081	381.863	361.97	192.443	183.985	155.666	232.292	189.54	198.171	488.938	382.392	446.14	11481.1	13123.6	-0.192806	0.0667577	0.190813	14690.4	11531.3	0.349333	0.0022307	0.00522531	14635.2	12160.7	0.267287	0.0026106	0.0056952	13716.8	9433.69	0.539993	5.09e-06	1.89e-05	13718.8	9919.59	0.467748	8.35e-07	3.11e-06	12178.8	12612.9	-0.0505036
Aco001634	112.211	220.615	187.955	529.351	336.163	325.892	236.533	270.899	249.584	199.413	232.925	245.547	479.597	603.758	644.379	459.417	324.605	423.917	682.43	811.916	635.562	12559.8	5500.45	1.19121	1.49e-05	0.000203088	7179.8	4838.98	0.569283	0.0220801	0.0424728	6761.86	5103.8	0.405864	0.0893706	0.142573	6703.94	10324.3	-0.622964	0.00119955	0.00308088	6336.71	10853.2	-0.776359	2.28e-05	7.19e-05	5624.44	6164.4	-0.132351
Aco018900	183.903	195.374	210.788	212.478	181.298	222.348	207.176	234.578	269.481	263.947	223.016	217.933	233.28	237.194	239.713	262.142	268.824	287.765	204.581	178.442	222.685	11347.9	10898.1	0.0584345	0.63626	0.802742	11787.2	9574.91	0.299942	0.0405845	0.0734366	12273.3	10099.1	0.281305	0.0205464	0.0382021	11005.8	9324.23	0.239183	0.0972608	0.158702	11507	9803.99	0.230982	0.0564748	0.0982942	10216.8	10120.1	0.0136653
Aco003511	175.884	188.546	188.943	103.57	126.446	120.981	354.366	374.819	385.061	809.166	728.89	608.764	211.132	262.074	245.854	540.015	426.472	639.678	1101.15	794.137	1183.49	3278.3	5181.49	-0.660569	4.75e-08	1.34e-06	9360.03	4552.6	1.03988	1.77e-24	2.49e-23	18947.8	4801.44	1.98053	6.78e-50	2.01e-48	8739.7	2693.89	1.69807	1.83e-42	7.4e-41	17765.1	2832.68	2.64897	1.59e-86	1.42e-84	15772.6	8036.83	0.972729
Aco014831	99.0609	104.47	113.875	153.945	144.167	125.359	146.026	159.494	215.893	121.344	130.339	130.438	124.485	125.315	126.094	158.296	165.208	154.095	143.133	164.361	135.298	12683.2	9531.2	0.412092	0.0009357	0.00668117	14052.6	8373.8	0.746922	4.95e-05	0.000149286	10823.1	8832.35	0.293183	0.00458456	0.00957138	13120.8	10424.7	0.33195	0.0533383	0.0942368	10144	10960.2	-0.111574	0.30465	0.413514	9004.53	12065.2	-0.42222
Aco008771	175.083	173.69	199.367	143.973	167.326	173.427	239.256	223.559	323.582	212.924	191.152	203.504	197.793	208.042	252.89	225.8	228.515	290.348	273.836	200.717	272.279	9247.96	10485.1	-0.181163	0.148118	0.333111	13501.1	9210.5	0.551749	0.00236691	0.00552303	10958.3	9715.16	0.173646	0.104973	0.164296	12606.1	7598.9	0.73031	1.33e-05	4.66e-05	10272.6	7990.44	0.362438	0.000783875	0.00198386	9120.13	11593.2	-0.34623
novel.1326	244.208	290.678	271.337	371.11	389.026	382.082	154.019	171.627	126.942	221.341	196.707	191.998	308.883	334.685	269.23	125.093	141.695	117.284	151.272	140.525	154.915	20315.4	14374.9	0.49904	1.97e-06	3.49e-05	7237.72	12633.3	-0.803681	4.23e-07	1.63e-06	10256.2	13323.4	-0.377411	0.00134247	0.00305557	6758.21	16694.7	-1.30477	1.44e-21	2.16e-20	9615.14	17553.9	-0.868344	2.51e-20	2.65e-19	8536.61	6214.45	0.458161
novel.566	295.413	253.176	241.052	296.847	336.573	248.09	283.88	230.802	249.688	259.031	246.727	252.967	282.57	265.824	363.516	448.375	492.312	612.906	598.105	472.09	475.85	10511.9	9445.15	0.154269	0.331732	0.556278	8198.31	8294.77	-0.0168961	0.909415	0.936371	8552.74	8746.58	-0.0323199	0.779726	0.834339	7655.33	8640.57	-0.174566	0.256484	0.354459	8017.18	9084.75	-0.180168	0.15623	0.237566	7117.37	7041.18	0.0155854
Aco000600	425.2	448.118	413.051	518.767	455.928	472.054	597.649	691.626	731.029	686.254	692.735	640.902	426.196	440.91	462.075	542.443	573.413	573.019	562.347	567.385	629.126	10909.9	9728.56	0.165415	0.102046	0.255412	13706.1	8547.73	0.681284	1.03e-07	4.25e-07	14402.7	9013.95	0.6762	8.48e-14	5.16e-13	12797.4	8965.81	0.513382	4.67e-05	0.000152044	13500.8	9426.69	0.518212	2.95e-08	1.29e-07	11985	11767.4	0.0263894
Aco023600	152.547	173.646	174.548	212.077	252.344	258.222	586.018	737.952	675.318	781.426	674.131	645.61	242.185	299.889	289.887	469.994	447.629	414.291	690.994	543.563	672.093	6877.1	4776.91	0.525717	4.37e-05	0.000508087	17110.1	4197.64	2.02722	2.47e-47	9.51e-46	18898.2	4427.23	2.0938	8.25e-66	3.77e-64	15975.8	5650.81	1.49938	4.98e-27	1.02e-25	17718	5942.01	1.57622	1.17e-38	2.9e-37	15731.1	14689	0.0988798
Aco016932	299.01	314.743	317.497	566.867	518.079	424.213	450.472	422.732	429.854	501.143	546.855	493.775	420.519	478.027	589.292	532.079	723.5	656.667	292.484	255.101	247.543	13658	8450.6	0.692552	5.03e-07	1.07e-05	10607.9	7424.62	0.514733	7.31e-08	3.09e-07	13193.9	7830.43	0.752733	1.46e-15	1e-14	9905.13	11226.7	-0.180627	0.192528	0.280945	12366.7	11803.1	0.0673875	0.594011	0.686852	10977.4	9109.43	0.269159
Aco004235	95.2963	79.6892	58.0714	94.093	43.5765	86.7706	377.318	528.657	1018.31	619.245	408.122	595.884	84.4482	84.0817	73.1365	230.43	147.485	173.862	270.277	354.506	418.382	3522.81	3673.76	-0.06028	0.838289	0.922265	27210.9	3226.27	3.0763	2.7e-18	2.68e-17	24099.3	3400.98	2.82504	2.37e-36	4.45e-35	25404.5	2894.25	3.13377	3.71e-09	2.01e-08	22595	3042.88	2.89219	1.96e-32	3.78e-31	20064.7	23357.4	-0.21923
Aco013981	22.6198	14.1828	12.7824	26.1038	28.7874	20.304	82.7066	83.1208	74.136	111.046	108.149	117.92	32.8503	50.0709	47.7304	279.732	244.514	343.289	505.143	449.379	308.787	2177.1	1441.26	0.594887	0.0170495	0.0688457	6247.29	1264.78	2.30437	5.82e-23	7.56e-22	9227.75	1333.36	2.79094	3.01e-38	6.13e-37	5833.4	1789.64	1.70527	1.71e-27	3.59e-26	8649.29	1881.59	2.20141	7.31e-56	3.06e-54	7678.31	5364.51	0.517401
Aco010025	132.132	150.28	128.314	165.581	240.481	219.572	145.951	132.165	112.167	152.374	169.1	234.752	169.004	212.83	181.769	254.74	241.988	188.569	162.869	136.84	120.454	14323.1	9425.89	0.603636	0.000333557	0.0028238	8033.5	8283.44	-0.0442395	0.770048	0.83087	12045.6	8734.78	0.463637	0.0120763	0.0234762	7501.47	11769.4	-0.649826	0.000144998	0.000436078	11286.8	12376.4	-0.132985	0.470048	0.580228	10018.3	6899.14	0.538145
Aco010507	1.46726	3.79872	4.17411	21.9287	10.714	7.29521	539.887	553.32	943.612	765.101	677.597	794.681	9.35976	12.8292	13.1072	641.534	408.376	523.035	311.182	253.687	370.066	530.392	125.545	2.07844	9.66e-06	0.000138857	24359.8	110.464	7.78456	2.93e-97	4.3e-95	28107.6	116.56	7.91343	1.64e-149	4.25e-147	22744.1	436.181	5.70453	1.03e-24	1.84e-23	26347.4	458.423	5.84497	7.13e-34	1.46e-32	23391.5	20915.2	0.161384
Aco008465	150.795	199.994	245.013	159.62	150.742	150.979	92.3217	146.166	424.477	227.85	132.696	121.523	232.861	234.544	286.05	955.762	1015.16	1394.62	267.074	283.623	652.475	4913.17	6357.99	-0.371973	0.0428077	0.137942	6360.79	5588.05	0.186889	0.779715	0.83824	4848.11	5895.64	-0.282186	0.288503	0.390573	5938.2	4037.66	0.556534	0.40961	0.512357	4547.98	4245.3	0.0994608	0.628147	0.715043	4039.66	5459.55	-0.43457
Aco017414	457.888	372.139	350.419	350.097	290.89	324.617	636.007	673.728	610.089	624.359	711.681	628.131	730.546	701.898	675.024	1018.86	1019.77	1241.27	997.424	1062.34	1594.32	5134.77	6299.63	-0.294848	0.0511581	0.157422	9183.33	5531.69	0.731302	7.48e-07	2.81e-06	9878.69	5832.76	0.760176	8.33e-08	3.1e-07	8574.83	4219.59	1.02283	9.12e-18	1.03e-16	9258.94	4436.51	1.06127	9.25e-22	1.06e-20	8218.5	7885.22	0.059788
Aco014055	94.9227	121.843	111.733	162.508	215.312	206.727	217.952	203.837	216.764	245.219	251.032	251.335	142.511	160.45	156.311	183.799	171.992	161.708	188.635	199.062	189.999	12445.8	7009.34	0.828313	2.33e-07	5.43e-06	12228.1	6161.15	0.988973	9.41e-13	6.24e-12	15048.3	6497.78	1.21163	3.8e-22	3.79e-21	11417.9	10226.7	0.158987	0.254523	0.352503	14104.9	10753.9	0.391373	0.00157809	0.00380858	12521.1	10500.7	0.253867
Aco016806	33.8469	43.5645	43.3612	41.7346	44.3276	49.2807	178.842	166.539	247.473	156.976	108.038	152.142	42.6583	43.8371	43.8384	94.1253	73.0797	93.5025	107.771	111.08	111.784	5764.8	5155.88	0.161127	0.26587	0.486971	22726.1	4531.8	2.32622	3.42e-30	6.58e-29	16796	4779.9	1.81306	5.81e-23	6.07e-22	21219.5	4736.7	2.16342	7.44e-37	2.38e-35	15747.2	4980.7	1.66058	6e-28	9.4e-27	13983.3	19514.6	-0.480899
Aco015068	125.546	143.485	155.079	172.558	141.053	169.212	442.768	464.947	579.882	426.904	387.969	427.037	154.381	165.863	170.985	441.001	345.217	441.296	605.004	520.672	550.096	5672.98	4996.26	0.183379	0.184679	0.384504	15729.7	4390.28	1.84112	2.4e-29	4.39e-28	13799.3	4630.84	1.57518	7.44e-39	1.55e-37	14686.9	4661.57	1.65555	3.39e-28	7.37e-27	12935.3	4901.29	1.3998	1.4e-36	3.2e-35	11483.9	13505.7	-0.234041
Aco012489	73.128	80.9199	82.1062	75.711	77.4248	75.8043	140.336	117.393	153.535	124.349	125.884	124.916	107.056	114.362	122.678	215.582	206.045	226.32	309.146	266.9	260.559	5893.07	6094.32	-0.0485139	0.608139	0.784047	9525.46	5354.96	0.830953	2.45e-08	1.09e-07	9130.74	5647.84	0.693025	2.26e-13	1.34e-12	8894.33	4842.86	0.877105	6.73e-11	4.32e-10	8558.52	5092.04	0.749201	2.29e-21	2.56e-20	7597.54	8180.45	-0.106701
Aco021063	206.512	245.73	215.304	364.29	328.313	280.672	398.992	405.648	399.703	329.674	361.405	355.107	281.97	301.643	269.272	362.12	364.62	332.981	453.341	437.952	469.667	10812.1	7435.02	0.540232	0.000140589	0.00135743	12034.5	6534.43	0.881132	9.31e-14	6.69e-13	10991.3	6890.83	0.673682	4.57e-09	1.91e-08	11237.1	8887.11	0.338561	0.00940098	0.0201671	10301.5	9343.48	0.140907	0.239241	0.339496	9144.18	10333.7	-0.176451
Aco012475	598.15	626.371	702.137	449.246	328.344	376.238	52.4267	57.4381	172.962	12.3174	15.5968	47.3326	542.768	516.868	181.229	91.1545	44.5513	66.4427	13.3847	67.2551	31.7697	16423.3	27501.6	-0.743741	6.28e-07	1.3e-05	3627.51	24161.4	-2.73552	2.18e-11	1.3e-10	1015.06	25485.3	-4.65022	7.65e-13	4.38e-12	3386.65	13496.9	-1.99464	0.00126892	0.00324341	950.454	14190	-3.9003	2.82e-09	1.35e-08	843.507	3114.16	-1.88453
Aco017171	38.4445	22.5746	20.2965	65.8143	57.8961	37.428	463.653	371.924	407.555	426.396	418.287	427.851	17.13	22.2118	27.2583	412.825	269.507	336.14	1064.66	729.305	835.509	2048.07	1037.92	0.980428	0.000883949	0.00638301	14213.6	910.679	3.96423	1.12e-53	5.32e-52	15292.4	960.023	3.99365	1.01e-66	4.77e-65	13272.3	1683.87	2.97898	7.58e-49	3.9e-47	14334.3	1770.18	3.01805	2.3e-63	1.22e-61	12725.1	12207.6	0.0599278
Aco008794	152.041	156.063	164.241	135.091	118.065	150.883	829.164	946.806	797.01	495.672	538.112	592.105	99.768	101.037	96.0888	413.232	274.053	371.66	703.154	690.921	597.948	3957.94	4640.41	-0.229168	0.0732099	0.203389	22670.4	4076.74	2.47528	2.93e-97	4.3e-95	15067.1	4299.73	1.80899	3.75e-58	1.41e-56	21168.1	3251.94	2.70218	1.62e-88	2.41e-86	14120.6	3419.34	2.04557	9.26e-62	4.69e-60	12534.1	19464.5	-0.635015
Aco016777	129.187	116.538	132.532	168.449	136.925	140.737	188.826	178.911	180.656	157.144	134.36	139.22	124.267	127.221	110.409	126.811	119.346	111.034	180.876	188.042	165.144	11337.9	9642.88	0.233599	0.0697739	0.196707	12538.9	8469.04	0.566061	9.67e-08	4.02e-07	10349.4	8932.49	0.212378	0.0579991	0.097416	11708.2	9318.07	0.329378	0.00782914	0.0170668	9702.65	9796.71	-0.0139264	0.906342	0.935035	8614.56	10767.5	-0.321803
Aco014283	148.644	181.486	241.884	112.961	138.875	162.121	100.703	96.2385	119.041	75.2677	56.8884	82.1697	243.429	223.737	255.94	84.1734	94.3319	109.477	94.9016	90.2478	97.1045	10878.6	15062.2	-0.469449	0.0270256	0.0982693	7470.95	13235.7	-0.825056	7.68e-05	0.00022597	5325.15	13965.2	-1.39102	8.17e-11	3.99e-10	6975.81	8937.28	-0.357462	0.0286514	0.0544745	4991.87	9398.36	-0.912962	6.8e-08	2.85e-07	4432.3	6415.26	-0.533628
Aco012479	63.4874	66.6209	73.1972	53.3649	60.4424	60.6198	97.9063	79.2992	109.007	75.9241	66.8478	82.7169	130.226	136.981	150.801	101.287	103.315	104.532	150.057	135.964	144.633	6489.8	7583.41	-0.224744	0.0486164	0.151914	9581.98	6662.45	0.524287	0.00123348	0.00301702	7932.55	7027.34	0.174693	0.167091	0.24563	8947.1	5332.83	0.746579	6.43e-07	2.69e-06	7435.54	5607.49	0.407017	0.00047381	0.00123758	6601.31	8229.15	-0.318096
Aco018996	37.5636	43.9334	39.4309	135.227	118.631	100.233	558.536	563.741	620.233	418.065	462.783	474.871	51.3968	64.7587	61.9457	378.796	306.969	276.033	393.227	381.52	374.678	4987.75	1707.87	1.54622	1.4e-24	6.13e-22	22081.9	1500.93	3.87923	8.95e-217	1.03e-213	18062	1582.82	3.51265	3.25e-199	1.44e-196	20618.4	4099.81	2.33047	2.12e-60	1.63e-58	16927.8	4310.28	1.9737	1.7e-52	6.6e-51	15025.8	18960.9	-0.335639
Aco021299	208.515	177.644	192.549	167.865	196.573	199.282	548.528	617.488	481.956	512.456	494.517	470.067	246.018	226.349	253.795	377.287	345.6	330.357	784.358	694.05	561.105	5505.17	5668.61	-0.042258	0.742602	0.868715	14470.4	4977.99	1.5394	1.02e-26	1.62e-25	13635.8	5249.92	1.37698	2.31e-39	4.91e-38	13511.6	4523.6	1.57863	4.68e-30	1.14e-28	12782.4	4756.66	1.42618	3.88e-42	1.08e-40	11347.7	12424.3	-0.130702
Aco003366	957.619	886.593	830.653	683.091	896.773	728.331	562.748	637.904	555.35	430.462	511.662	519.763	654.937	638.064	667.28	551.353	587.366	562.677	1344.74	1262.8	1080.93	11037.9	12827.5	-0.216862	0.136297	0.31477	7549.95	11267.2	-0.577584	2.77e-06	9.74e-06	6610.87	11881.2	-0.845811	2.06e-11	1.06e-10	7049.61	9071.47	-0.363696	0.011284	0.0237732	6195.24	9538.62	-0.622548	5.44e-06	1.85e-05	5498.8	6482.31	-0.237433
Aco006437	27.2417	23.0089	36.1517	14.6064	13.6707	19.0519	263.031	224.375	338.457	216.78	191.129	218.513	64.658	67.8828	78.0268	192.7	116.921	180.689	562.918	475.826	558.75	953.026	1744.71	-0.871982	5.9e-05	0.000657339	14969	1532	3.28824	9.07e-47	3.43e-45	11928.1	1616.44	2.88303	2.38e-57	8.8e-56	13976.9	782.919	4.15712	4.72e-107	1.05e-104	11181.4	823.273	3.76187	1.51e-158	5.33e-156	9927.02	12854.7	-0.372933
Aco015991	157.232	206.674	167.052	210.222	191.219	209.791	190.975	188.071	175.366	242.76	228.326	213.139	202.628	217.086	217.884	293.257	273.977	252.534	345.14	295.304	255.848	9639.4	8394.63	0.1996	0.149098	0.334367	7864.78	7379.67	0.0918939	0.539492	0.651395	10201.7	7781.78	0.390745	0.00543896	0.0112147	7343.73	7921.09	-0.109327	0.30309	0.405172	9563.68	8328.56	0.199456	0.0367095	0.0669422	8490.51	6753.54	0.330321
Aco008013	21.3624	25.2736	21.0496	47.633	50.9516	40.8168	96.267	160.546	129.836	130.342	123.452	133.753	27.637	32.3299	30.584	81.3391	74.0726	71.2598	102.584	118.622	107.7	6751.28	3286.28	1.03869	1.76e-13	1.6e-11	16835.5	2888.25	2.54333	1.98e-33	4.4e-32	17744.8	3045.59	2.54283	6.58e-105	7.65e-103	15718.8	5549.13	1.50227	1.85e-15	1.75e-14	16633.1	5834.39	1.51166	2.02e-41	5.48e-40	14766.3	14449.5	0.0312491
Aco005386	28.532	37.6513	34.9158	54.7775	61.4819	55.9536	210.609	208.4	146.844	228.839	253.201	202.747	28.0436	31.0179	29.9766	145.517	103.485	118.403	234.091	189.662	167.8	5308.65	3123.26	0.765251	5.34e-08	1.47e-06	15682	2745.46	2.514	1.19e-37	3.18e-36	19955.9	2895.54	2.78501	8.89e-76	5.22e-74	14643.5	4362.71	1.74699	2.6e-27	5.4e-26	18705.8	4587.25	2.02799	2.3e-70	1.43e-68	16604.4	13466.7	0.302247
Aco016141	12.9528	15.2299	14.3072	18.1134	19.4059	15.4132	397.344	449.952	307.496	339.286	278.364	360.544	15.1148	14.9316	15.1311	49.2642	20.0398	20.8883	258.485	296.757	196.099	1416.49	1139.76	0.312961	0.0314108	0.110101	27780	1001.64	4.79371	1.36e-160	6.98e-158	24747.2	1056.36	4.55025	8.29e-228	4.65e-225	25939.6	1164.27	4.47822	8.98e-157	5.17e-154	23197.9	1224.12	4.24503	5.43e-213	4.01e-210	20596.4	23852.2	-0.211723
Aco005416	1456.22	2229.59	1156.36	1348.07	797.936	888.852	879.789	981.225	359.701	660.132	879.868	906.858	2074.18	2151.49	1740.23	1678.26	2085.57	2083.47	1624.65	1684.54	1842.6	7341.17	11746.6	-0.678096	0.0139501	0.0589036	4828.76	10332.3	-1.09749	0.00329265	0.0074882	5602.16	10890.7	-0.959023	0.000109828	0.000289598	4509.1	6034.01	-0.420329	0.379487	0.482875	5249.2	6343.21	-0.273209	0.165892	0.250045	4658.65	4146.32	0.168121
Aco008167	110.109	131.544	128.451	203.287	264.687	207.983	124.432	112.285	152.652	152.639	144.162	185.354	261.5	251.055	280.13	181.706	215.543	219.202	153.457	123.819	138.219	13147.2	7214.11	0.865777	9.97e-09	3.34e-07	6812.92	6340.01	0.103881	0.53484	0.647645	8866.97	6686.7	0.407085	0.00498365	0.010345	6361.38	10805.4	-0.764182	4.44e-06	1.66e-05	8310.43	11361.7	-0.451155	0.00187507	0.00446407	7377.52	5850.43	0.334425
Aco009199	332.053	313.492	341.687	487.197	405.22	397.795	399.746	348.462	301.658	445.209	519.946	452.718	455.973	427.572	452.755	827.932	886.567	851.816	283.327	281.172	353.767	9771.52	7499.18	0.38181	0.00199544	0.0124234	7152	6587.01	0.118587	0.413116	0.532993	10156.2	6947.28	0.547818	6.83e-07	2.32e-06	6678.4	8031.01	-0.266178	0.0757828	0.128243	9518.86	8443.49	0.172979	0.149715	0.228917	8449.03	6142.35	0.460149
Aco003997	53.275	48.8156	40.9266	90.9218	106.745	70.7025	737.033	526.907	377.82	421.425	447.645	526.892	63.913	69.8351	73.6474	196.018	176.752	166.045	543.042	443.393	361.895	3846.55	2055.97	0.903576	2.4e-06	4.13e-05	21155	1805.89	3.55026	9.08e-45	3.17e-43	18920.6	1904.05	3.31297	4.04e-106	4.86e-104	19755.3	3162.07	2.64347	1.61e-29	3.74e-28	17731.7	3324.56	2.41549	1.58e-51	5.96e-50	15739.7	18173.3	-0.207383
Aco014493	31.5435	40.1899	24.8969	48.7532	86.6722	53.9476	340.769	292.117	283.952	304.517	366.307	325.413	47.7281	59.2771	80.7133	954.252	1062.86	998.841	970.265	729.335	729.323	1803.07	922.03	0.967518	0.000298715	0.00257214	7847.48	810.599	3.27584	3.38e-57	1.81e-55	8965.61	854.505	3.39203	3.7e-71	1.97e-69	7327.75	1482.07	2.30643	1.82e-27	3.81e-26	8402.56	1558.44	2.43154	8.65e-35	1.83e-33	7457.97	6739.63	0.146217
Aco019895	21.4118	32.7226	31.7502	50.1149	46.8337	46.7158	161.043	146.161	159.287	120.144	112.024	132.718	43.7537	48.6037	54.6924	153.57	116.397	113.721	139.965	133.348	112.855	5503.8	3296.78	0.739381	3.63e-05	0.000433701	16077.9	2898.73	2.47162	6.73e-38	1.83e-36	13219.6	3057.56	2.11223	1.94e-30	2.87e-29	15012.7	4523.09	1.73082	4.69e-59	3.49e-57	12390.8	4755.66	1.3815	4.78e-42	1.32e-40	11000.1	13807.1	-0.327939
Aco006321	632.858	751.734	734.3	837.153	909.645	928.951	370.038	490.691	306.598	383.351	360.88	384.493	378.237	379.891	329.895	176.69	201.655	190.644	248.912	198.645	194.552	20092.8	15949.7	0.333155	0.00333928	0.0189917	7879.54	14017	-0.831039	3.08e-05	9.56e-05	8013.7	14783.5	-0.883459	1.69e-15	1.15e-14	7357.37	16510.8	-1.16621	1.71e-11	1.16e-10	7511.8	17361	-1.20865	1.83e-41	4.98e-40	6668.75	6764.37	-0.0204828
Aco014094	67.3165	75.9482	87.0548	87.1877	73.7869	73.9814	374.288	348.519	361.612	414.564	417.625	458.542	113.482	108.598	112.533	222.657	187.096	216.076	356.627	302.541	278.833	3770.01	3704.89	0.0250492	0.861946	0.934772	15654.2	3255.37	2.26554	6.23e-61	3.74e-59	19588	3433.98	2.51189	9.42e-81	6.14e-79	14617	3098.39	2.23804	1.26e-78	1.46e-76	18359.2	3257.57	2.49458	4.45e-119	7.89e-117	16297.7	13442.9	0.2778
Aco001580	140.027	134.215	110.923	80.6322	100.734	87.4946	564.803	392.654	278.524	291.776	279.88	306.189	103.022	109.336	136.859	222.102	179.679	213.548	447.893	335.65	282.273	4246.61	6101.53	-0.522964	0.000517767	0.00408937	17551.7	5359.97	1.71131	4.32e-11	2.51e-10	13108.4	5651.35	1.2139	1.22e-21	1.18e-20	16390.6	3489.91	2.23164	5.09e-23	8.33e-22	12286.8	3669.63	1.7437	3.89e-53	1.54e-51	10907.7	15078.4	-0.467097
Aco002130	52.9554	69.8675	66.1696	77.4821	86.2305	84.4857	464.282	412.506	514.001	251.567	282.759	354.847	36.6978	45.3689	33.6457	193.602	129.074	153.739	285.252	321.283	269.908	4579.02	3494.37	0.390008	0.0057082	0.029249	23085	3071.64	2.90993	1.38e-69	1.06e-67	15518.7	3239.64	2.2601	2.99e-37	5.85e-36	21555.3	3762.82	2.51823	6.78e-86	9.2e-84	14541.8	3956.57	1.87788	2.05e-41	5.53e-40	12907.5	19824.3	-0.619128
Aco018556	278.855	430.281	547.697	385.654	313.472	405.086	111.176	137.708	192.079	160.845	106.902	105.709	438.263	412.486	488.99	176.98	276.088	340.171	170.298	161.188	183.26	12843.4	14646	-0.189468	0.425424	0.644167	4616.55	12875.4	-1.47965	3.19e-07	1.25e-06	4104.41	13585.8	-1.72682	3.84e-11	1.92e-10	4310.32	10552.8	-1.29162	1.44e-10	8.94e-10	3849.37	11095.7	-1.52727	1.94e-18	1.82e-17	3418.6	3963.22	-0.213371
Aco017378	6.88033	13.3344	5.91772	27.822	36.7357	28.2155	297.07	281.972	282.635	272.24	255.338	317.089	17.1408	26.1681	24.8215	249.944	218.126	191.268	275.2	264.114	212.595	2145.26	605.357	1.82597	1.14e-09	4.8e-08	17917.7	532.809	5.07257	5.41e-67	3.93e-65	18466.3	561.555	5.04032	3.34e-72	1.83e-70	16730.6	1763.17	3.24693	6.93e-114	1.7e-111	17307.8	1853.94	3.22341	1.65e-112	2.62e-110	15365.1	15386.5	-0.00204565
Aco009511	252.886	107.852	84.445	301.831	282.207	256.472	448.948	471.632	456.784	351.666	332.293	324.735	420.325	360.084	447.423	168.175	208.171	154.626	402.666	442.818	391.112	9078.25	4833.97	0.909214	0.00951455	0.0440649	13381.3	4237.87	1.65881	4.78e-06	1.64e-05	10300.1	4466.17	1.20556	0.0185623	0.0348511	12494.5	7461.33	0.743874	3.89e-11	2.55e-10	9655.58	7844.76	0.299762	0.00272763	0.00630416	8572.01	11489.7	-0.422619
Aco005130	176.432	224.032	182.602	267.382	290.673	279.71	166.085	185.473	155.073	154.418	152.637	173.133	212.004	230.057	215.632	145.912	152.766	137.908	200.423	181.901	164.29	14302	9978.11	0.519424	6.34e-05	0.000698045	7777.46	8771.01	-0.173417	0.255179	0.361329	7751.94	9248.89	-0.25471	0.063277	0.105183	7262.1	11753.1	-0.6946	2.5e-09	1.38e-08	7265.65	12358	-0.766346	2.79e-15	2.16e-14	6449.87	6677.78	-0.050119
Aco008380	20.6742	25.8379	17.9603	94.702	69.5519	50.7814	440.329	431.424	463.069	387.864	381.33	400.727	28.1305	35.5911	31.9831	336.429	211.652	229.48	528.434	485.317	460.464	3111.9	935.652	1.73398	2.36e-12	1.7e-10	17379.6	822.495	4.40204	1.41e-150	5.91e-148	16011.4	867.146	4.20759	6.82e-165	2.15e-162	16227.9	2558.49	2.6653	2.79e-39	9.77e-38	15007.9	2689.5	2.48051	1.24e-39	3.16e-38	13323.1	14923.7	-0.163724
Aco017360	129.783	133.719	96.063	144.756	170.699	127.541	428.977	441.851	529.482	402.249	429.042	404.419	113.784	113.518	97.8257	249.942	198.032	240.676	348.156	377.235	355.805	5823.27	4740.21	0.296829	0.102976	0.257263	16557.5	4164.99	1.99124	9.87e-28	1.66e-26	15356.5	4390.89	1.80642	4.03e-32	6.41e-31	15460	4786.48	1.69177	4.29e-28	9.29e-27	14393.7	5032.63	1.5164	9.1e-34	1.85e-32	12777	14216.9	-0.154116
Aco005138	353.477	329.784	441.243	413.777	350.579	478.184	792.283	904.408	660.06	587.031	527.04	628.955	541.077	512.26	547.129	318.907	338.486	268.933	466.852	519.957	438.6	8407.49	7630.52	0.139946	0.413944	0.633846	14341.4	6701.8	1.09748	1.2e-09	6.07e-09	11154.6	7070.14	0.657699	1.12e-05	3.34e-05	13391.3	6907.42	0.954903	5.2e-09	2.78e-08	10455.7	7263.08	0.525396	8.71e-05	0.000253568	9282.51	12313.5	-0.40765
Aco019013	794.822	1265.6	1189.75	922.314	745.506	1020.93	6812.76	6790.01	4045.93	2980.85	3468.68	3906.83	544.44	606.901	747.748	1562.98	1561.42	1848.84	5274.41	3442.63	2522.77	3860.64	4676.72	-0.276457	0.183648	0.382977	22786.7	4112.45	2.47012	4.08e-21	4.78e-20	14070.6	4337.7	1.69769	4.03e-17	3.04e-16	21278	3171.9	2.74573	1.06e-39	3.81e-38	13185.4	3335.15	1.9827	1.69e-41	4.61e-40	11703.3	19568	-0.741573
Aco012472	0.755186	1.7146	0.565557	1.08009	0.405549	0.362724	462.049	476.857	386.833	489.449	449.729	488.282	1.17025	2.72177	4.30524	398.235	213.278	297.563	1092.07	1097.4	770.873	20.4349	33.6456	-0.715292	0.310185	0.535299	13189.8	29.6295	8.81379	4.69e-159	2.3e-156	14931.7	31.2208	8.92024	8.82e-207	4.14e-204	12316	16.8041	9.51937	5.14e-279	1.56e-275	13996.7	17.6602	9.63022	2.93e-110	4.39e-108	12426.1	11325.8	0.133818
Aco000475	368.816	413.65	361.423	537.124	448.407	457.659	372.34	447.511	354.201	373.749	410.6	352.411	459.815	427.146	452.182	449.117	497.513	428.167	348.074	381.636	356.586	11336.9	9011.33	0.331291	0.00724289	0.0354139	8294.29	7918.8	0.0668539	0.641872	0.735361	8444.54	8350.45	0.0162852	0.887544	0.920146	7744.62	9317.19	-0.266744	0.0564212	0.099051	7915.28	9795.87	-0.307498	0.00657697	0.0141638	7026.09	7121.04	-0.019281
Aco016429	75.2145	98.3708	100.352	120.112	113.81	132.768	152.173	176.822	183.335	152.085	155.228	173.692	86.9316	95.0433	109.218	195.099	139.847	167.937	169.19	143.57	152.63	8860.69	6634.66	0.417462	0.00510313	0.026781	11137.1	5831.69	0.933429	1.92e-08	8.59e-08	10993.4	6151.19	0.837661	2.14e-08	8.45e-08	10398.8	7280.54	0.514262	4.84e-05	0.000157198	10303.4	7655.35	0.42837	4.72e-05	0.000142895	9146.32	9561.84	-0.0642165
Aco009558	213.832	242.954	344.736	78.1724	104.988	173.382	204.528	239.57	603.842	144.57	122.846	129.619	156.54	146.526	176.46	308.348	235.099	374.386	385.501	293.242	549.186	4638.67	10450.9	-1.17173	6.58e-05	0.000719807	12280.2	9182.05	0.419471	0.283049	0.393217	4883.24	9688.57	-0.988486	2.7e-07	9.55e-07	11464.9	3809.18	1.58966	0.0116367	0.024427	4578.05	4006.3	0.192255	0.404475	0.517545	4064.66	10542.1	-1.37498
Aco023104	311.042	372.142	369.375	536.417	557.803	545.198	307.476	363.249	320.638	378.607	387.499	354.99	265.998	281.999	238.299	309.357	287.174	288.316	342.018	319.005	317.069	14966.3	9631.88	0.635813	9.89e-09	3.32e-07	8138.94	8464.79	-0.0566201	0.680384	0.766443	9676.25	8927.86	0.116175	0.317851	0.423378	7599.5	12299	-0.694543	6.68e-10	3.91e-09	9070.21	12932	-0.511637	1.24e-09	6.14e-09	8051.77	6987.71	0.204513
Aco007096	13.0055	13.2643	9.34497	19.5923	17.4358	18.7346	580.871	577.646	846.342	510.13	483.059	581.084	14.0752	16.6174	15.3428	158.903	101.499	126.94	611.44	713.338	531.482	699.131	447.982	0.643551	0.000638306	0.00484821	22623.6	393.612	5.84575	7.42e-149	2.95e-146	18667.7	414.95	5.4928	8.88e-235	5.84e-232	21123.6	574.525	5.20007	2.57e-195	3.05e-192	17496.8	604.069	4.85546	0	0	15532.8	19425.5	-0.322699
Aco031054	105.396	150.559	129.437	194.124	264.395	204.675	494.298	589.525	468.605	532.43	593.88	537.089	91.7993	115.694	96.1195	457.176	363.075	359.776	460.175	407.872	328.473	6795.59	3956.47	0.78032	2.6e-05	0.000323913	14299.8	3478.58	2.0395	1.52e-29	2.82e-28	16112.8	3668.53	2.13505	1.15e-42	2.72e-41	13352.2	5585.13	1.25757	4.74e-15	4.33e-14	15102.1	5872.74	1.3629	1.39e-23	1.76e-22	13405.3	12277.2	0.126866
Aco024300	89.5267	110.719	101.473	114.362	129.567	133.751	150.325	160.513	153.675	135.524	139.924	140.42	110.25	112.203	114.092	165.087	146.543	140.303	195.064	202.484	171.676	8783.4	7033.5	0.320588	0.0129476	0.055616	9715.94	6181.91	0.652359	3.26e-07	1.28e-06	9144.93	6519.56	0.488245	2.93e-05	8.31e-05	9072.07	7217.3	0.329969	0.0035703	0.008365	8571.54	7589.1	0.175597	0.0731057	0.123498	7608.95	8342.42	-0.132795
Aco003806	103.06	70.3764	79.9777	331.419	232.149	136.073	1099.38	1078.53	588.181	417.595	644.203	639.81	51.9098	55.3455	42.9346	583.809	376.515	267.002	1197.68	744.718	539.891	5505.2	2001.46	1.45964	1.09e-06	2.1e-05	19567.6	1756.74	3.47743	2.44e-38	6.74e-37	12672.3	1852.56	2.77398	1.7e-37	3.37e-36	18272.2	4527.07	2.01303	3.75e-06	1.42e-05	11872.2	4758.5	1.31905	0.000911906	0.00228286	10535.3	16804.1	-0.673563
Aco010227	92.3183	90.699	99.065	65.6735	69.4497	67.7744	105.302	102.231	106.152	99.9921	106.374	114.308	85.8317	84.3262	89.3603	145.366	150.088	154.286	126.389	123.529	126.248	6150.32	8573.87	-0.479419	1.88e-07	4.44e-06	8553.04	7531.61	0.183436	0.0581088	0.100791	9192.84	7943.75	0.210572	0.0432108	0.0750717	7986.32	5054.19	0.660128	2.98e-11	1.97e-10	8615.71	5314.31	0.697081	2.18e-13	1.48e-12	7647.89	7344.54	0.0583151
Aco010200	232.733	346.01	320.252	439.564	397.694	506.268	143.554	160.817	127.309	113.785	111.276	102.311	238.358	244.799	198.41	69.1456	83.2979	77.1888	121.512	114.709	128.381	20182.5	13534.4	0.576519	0.0012886	0.00869502	5832.17	11900	-1.02889	8.04e-08	3.37e-07	4649.99	12551.2	-1.43247	1.8e-17	1.39e-16	5445.74	16582.2	-1.60656	1.36e-29	3.19e-28	4359	17436	-2.00001	1.46e-67	8.6e-66	3869.72	5007.56	-0.371698
Aco005683	136.39	203.063	144.136	209.141	236.383	211.552	117.226	109.34	107.799	75.7418	82.6181	82.3122	106.852	100.077	91.0336	55.8245	57.3122	48.2247	87.7917	106.777	84.5373	17635	13006.9	0.439197	0.012567	0.0543324	8071	11438.1	-0.502998	0.00722618	0.0153586	6107.91	12060.2	-0.981462	2.02e-08	7.96e-08	7536.32	14492.9	-0.943397	3.38e-17	3.66e-16	5724.58	15238.8	-1.41247	1.38e-46	4.39e-45	5081.45	6930.96	-0.447793
Aco006680	103.531	126.171	152.911	209.263	155.247	186.656	222.019	297.881	462.872	312.683	266.124	241.837	148.03	209.317	190.357	461.51	353.963	459.583	259.493	185.724	349.094	6905.6	4805.43	0.523109	0.00448504	0.0241327	11085.2	4222.89	1.39236	8.58e-07	3.21e-06	9719.93	4455.08	1.12546	1.98e-10	9.32e-10	10349.6	5674.75	0.866978	0.000275262	0.00079078	9113.42	5966.32	0.611066	1.69e-05	5.43e-05	8091.61	9515.75	-0.233958
Aco005884	22.3287	32.6414	17.5537	370.463	306.211	133.724	250.173	255.877	420.445	129.237	128.701	124.181	26.5263	29.2562	27.2075	165.696	133.784	134.906	250.265	264.54	295.197	16072.7	1441.92	3.47871	2.3e-23	8.34e-21	16538	1268.15	3.70531	6.55e-37	1.71e-35	7164.91	1336.72	2.42277	1.21e-28	1.64e-27	15441.2	13218.8	0.224219	0.645333	0.729432	6716.15	13894.6	-1.04879	0.00555837	0.0121198	5962.16	14199.6	-1.252
Aco002081	281.235	369.199	315.017	487.076	485.474	530.496	213.529	236.549	203.125	200.593	157.285	166.793	244.411	266.886	234.376	127.267	147.149	129.34	165.598	162.066	159.355	18343.1	11810.9	0.635193	1.81e-06	3.25e-05	7169.37	10382.5	-0.534227	0.000425498	0.00111906	6052	10949	-0.855247	2.85e-08	1.11e-07	6694.29	15072.6	-1.17101	2.67e-25	4.98e-24	5674.35	15848.6	-1.48181	6.23e-37	1.44e-35	5038.42	6155.7	-0.288884
Aco009206	65.812	71.9897	89.0782	91.0948	85.0377	88.6358	57.1049	53.1807	59.4051	39.5595	34.8062	45.2877	78.8422	77.1088	72.8623	71.3677	65.5769	67.4361	69.5596	74.0877	68.1999	11862	10189.3	0.219247	0.119899	0.287729	6839.81	8952.2	-0.388312	0.0124767	0.0252985	5069.68	9444.13	-0.897657	4.68e-08	1.78e-07	6386.6	9747.9	-0.610024	1.05e-08	5.43e-08	4751.86	10249.3	-1.10915	5.93e-21	6.49e-20	4218.69	5873.56	-0.477619
Aco020409	48.4366	77.5293	57.831	150.825	145.197	129.559	315.419	362.468	565.084	424.476	561.405	431.417	55.4234	72.2073	74.0486	368.728	348.735	310.454	188.791	278.653	216.753	5682.47	2459.19	1.20847	1.5e-10	7.52e-09	14937.2	2162.85	2.78805	7.06e-25	1.02e-23	17897.4	2280.67	2.97242	5.37e-48	1.49e-46	13946.3	4670.39	1.57838	2.68e-14	2.3e-13	16773	4910.42	1.77235	2.71e-39	6.81e-38	14886.2	12823.9	0.21509
Aco013659	137.18	107.615	150.274	36.9309	31.3259	55.3634	190.941	209.353	287.328	154.052	141.581	177.051	191.889	189.157	272.383	404.404	356.754	639.292	362.052	274.15	438.588	1660.61	5324.51	-1.68038	7.88e-13	6.3e-11	8314.65	4674.78	0.830751	9.27e-05	0.000269515	6006.67	4931.45	0.284356	0.0836849	0.134451	7763.29	1363.91	2.50831	1.28e-28	2.86e-27	5629.97	1434.28	1.97183	1.78e-24	2.35e-23	4998.11	7138.72	-0.514474
Aco013495	65.3728	72.7157	65.1264	63.1067	62.8377	72.0344	215.41	199.005	209.413	193.186	194.782	224.885	82.0657	83.5666	84.3327	147.793	124.243	131.662	226.205	233.991	203.608	4533.56	4666.32	-0.0413221	0.717447	0.854684	12851.2	4100.46	1.64817	5.29e-50	2.25e-48	13273.4	4324.08	1.61812	1.52e-43	3.71e-42	11999.8	3725.05	1.68746	2.63e-50	1.43e-48	12440.3	3916.88	1.66696	8.97e-52	3.41e-50	11043.3	11036	0.00090569
Aco017490	380.474	397.404	365.214	472.336	472.246	483.383	349.191	366.404	265.457	400.39	392.118	362.111	328.033	343.062	318.456	290.977	314.011	306.344	444.829	331.616	347.73	11958.5	9599.93	0.317021	0.000243013	0.00216298	7387.35	8434.55	-0.191322	0.23143	0.333692	9141.53	8894.53	0.0396357	0.674541	0.757057	6898.03	9826.98	-0.510682	0.000417461	0.00116397	8569.42	10332.7	-0.269883	0.00157252	0.00379557	7607.53	6343.36	0.262335
Aco001982	279.415	153.149	144.054	386.038	289.318	252.532	645.117	650.868	820.761	1477.32	1423.12	1371.78	309.467	332.825	312.363	1353.01	902.71	1294.42	967.587	1185.42	2348.08	3650.46	2278.92	0.679717	0.0156596	0.0645225	7494.17	1999.21	1.90637	3.95e-12	2.49e-11	15892.9	2107.55	2.91475	9.37e-33	1.53e-31	6997.39	3000.76	1.22163	3.2e-11	2.11e-10	14898.2	3154.61	2.23971	5.75e-49	1.95e-47	13226	6434.84	1.03928
Aco012733	206.374	221.825	203.774	390.635	339.147	343.33	345.128	385.95	303.096	223.258	226.916	231.266	279.782	275.025	280.014	313.681	285.342	307.477	338.461	285.603	259.635	11561.4	6828.15	0.759823	1.53e-12	1.15e-10	10020.1	5999.63	0.739938	4.74e-08	2.05e-07	6943	6326.91	0.134113	0.135363	0.204745	9356.15	9501.54	-0.0223063	0.867299	0.906936	6507.73	9989.84	-0.618352	1.12e-10	6.07e-10	5776.98	8603.33	-0.574531
Aco009829	42.2315	59.7738	69.0697	160.153	123.43	130.554	465.379	469.639	503.797	373.507	350.726	386.023	25.7378	36.7324	46.1181	311.836	278.4	256.021	302.162	341.185	283.777	5612.68	2323.43	1.27237	4.32e-10	2e-08	17545.2	2042.38	3.10268	5.37e-55	2.67e-53	14230.6	2154.71	2.72333	3.38e-48	9.45e-47	16382.5	4612.79	1.82839	7.62e-42	2.99e-40	13339	4849.67	1.45959	2.18e-33	4.36e-32	11842	15065.5	-0.3474
Aco014000	802.313	1206.45	340.596	312.199	5536.22	1578.9	0.171197	1.8825	0.367947	0	0.138877	0	432.294	587.923	327.694	0.27936	17.5823	0.801777	0	0	0	41679.7	13195.9	1.65925	0.106127	0.262819	12.1677	11609.7	-9.89871	1.13e-20	1.29e-19	0.736949	12230.9	-13.9775	2.29e-28	3.06e-27	11.3591	34270.8	-11.5593	2.5e-18	2.96e-17	0.689588	36046.8	-15.6462	2.16e-18	2.02e-17	0.610653	10.4285	-4.05736
Aco024987	150.765	193.053	157.767	217.438	255.708	233.632	611.281	775.73	580.694	653.348	767.067	710.021	174.889	223.268	184.458	424.092	362.699	342.776	451.381	410.27	461.998	5581.38	3970.25	0.491432	0.000538119	0.00422336	13969.7	3490.01	2.00109	4.87e-30	9.29e-29	15909.2	3680.19	2.11216	4.96e-51	1.5e-49	13043.8	4586.73	1.50791	1.48e-24	2.64e-23	14910.1	4822.89	1.62849	2.03e-49	7.06e-48	13234.2	11993	0.142099
Aco030461	0	0	0	0.103559	0	0.181914	1009.22	1234.87	1066.98	1110.47	1022.09	923.124	0.301177	1.34675	1.75433	943.92	114.034	276.136	910.207	765.631	816.703	1.93487	0	3.50348	0.331217	1	20211	0	17.0327	1.35e-46	5.06e-45	19605	0	16.9121	3.49e-46	9.15e-45	18871.4	1.58774	13.4146	1.51e-108	3.38e-106	18379.8	1.66972	13.3032	1.41e-108	2.02e-106	16317.8	17351.7	-0.0886061
Aco010963	308.516	331.206	351.881	322.763	378.725	358.645	350.865	394.076	273.623	357.833	425.558	370.336	309.509	280.003	269.737	274.49	252.644	192.86	268.932	255.211	212.459	10137.8	9505.88	0.0927648	0.417115	0.636966	8756.35	8351.95	0.0681411	0.686527	0.771853	10432.5	8809.1	0.244016	0.0403998	0.0705923	8176.26	8330.82	-0.0270608	0.863379	0.903925	9777.59	8759.86	0.158657	0.161457	0.244341	8678.53	7518.36	0.207135
Aco015453	167.383	189.019	181.907	174.492	181.598	185.15	333.369	390.631	415.652	542	530.79	435.538	210.517	250.99	218.187	419.746	407.855	457.633	429.042	363.417	497.317	4908.98	4894.96	0.00419049	0.965878	0.986357	9298.12	4301.38	1.11224	5.87e-16	4.95e-15	12931.2	4536.39	1.51133	1.73e-32	2.79e-31	8681.7	4033.93	1.10587	1.21e-18	1.47e-17	12122.9	4241.57	1.51512	2.18e-41	5.89e-40	10762.3	7982.85	0.43098
Aco015977	88.1961	86.6276	94.3713	110.233	93.6256	112.894	342.02	328.781	424.474	328.61	342.493	342.184	88.1821	100.507	102.135	239.715	170.858	238.024	494.478	442.369	625.25	3904.58	3328.11	0.230697	0.0545817	0.165317	12150.6	2923.54	2.05524	3.32e-44	1.14e-42	11813.6	3083.51	1.93762	7.2e-103	8.04e-101	11345.3	3208.35	1.82203	3.02e-35	8.98e-34	11072.8	3373.41	1.7143	2.17e-61	1.08e-59	9829.24	10433.5	-0.086163
Aco012054	987.726	1020.84	1067.25	525.971	735.672	609.003	3.8937	2.5221	2.32161	1.58614	0.81513	0.684349	895.164	668.697	761.821	0.871079	10.6118	6.2354	0.474003	0.359939	0.261801	14283.8	23542.7	-0.720975	1.46e-06	2.71e-05	59.9932	20683.3	-8.43879	0	0	22.2328	21814.6	-9.92308	0	0	56.0236	11738.6	-7.7192	9.83e-281	3.49e-277	20.8615	12343.4	-9.19574	5.34e-299	7.4e-296	18.5328	51.5405	-1.4679
Aco000555	54.5833	62.1569	68.1586	64.2676	69.9178	73.9579	114.63	93.648	108.049	90.7662	79.5238	96.5428	74.3808	78.5067	87.0772	119.832	104.498	123.028	148.614	133.438	121.117	6564.5	5845.38	0.167369	0.190735	0.392672	8975.33	5136.35	0.805179	6.3e-08	2.68e-07	7957.05	5417.88	0.554409	4.78e-05	0.000132035	8380.82	5394	0.635687	8.16e-07	3.36e-06	7458.65	5671.83	0.394977	0.000464285	0.00121428	6621.88	7708.39	-0.219235
Aco006278	100.14	100.896	105.266	145.04	148.692	145.048	159.131	176.303	128.86	152.174	159.876	195.637	139.152	157.416	165.325	218.981	229.718	208.119	124.62	154.201	122.07	8330.61	5831.34	0.514481	4.6e-10	2.11e-08	7925.83	5122.82	0.629533	3.13e-05	9.73e-05	9117.4	5402.92	0.75477	1.22e-08	4.93e-08	7400.75	6846.02	0.112338	0.42317	0.526264	8544.34	7198.27	0.24724	0.037508	0.0682915	7584.51	6805.33	0.156401
Aco018060	71.5832	73.364	88.7716	39.946	112.67	77.7364	118.178	108.427	120.372	101.154	63.1388	53.6342	390.092	482.805	877.318	494.963	696.459	697.996	771.58	566.771	455.804	2125.66	2160.5	-0.0237498	0.940959	0.973515	2878.2	1897.96	0.600515	2.03e-05	6.46e-05	1897.57	2002.13	-0.0772382	0.745824	0.807827	2687.5	1746.78	0.621886	0.0300011	0.0567166	1780.02	1837.11	-0.0453889	0.927247	0.949528	1580.98	2471.64	-0.644389
Aco010228	809.072	307.446	246.59	238.571	336.456	318.301	502.892	402.451	326.382	440.818	585.181	508.625	901.23	803.423	807.424	340.896	491.065	365.338	486.459	542.778	638.19	5150.79	7901.47	-0.61733	0.295321	0.519167	6385.47	6925.15	-0.117074	0.772839	0.832638	8367.8	7297.93	0.197364	0.597441	0.691336	5962.77	4232.35	0.494471	0.0101662	0.0216453	7841.48	4450.62	0.8172	2.39e-07	9.41e-07	6959.36	5484.62	0.34371
Aco016140	51.3936	51.4771	51.7556	53.3059	63.7944	56.562	458.84	574.33	282.637	417.997	384.175	422.842	45.3803	51.3104	53.9638	68.2299	60.9735	58.2159	707.422	576.743	373.67	2349.89	2097.86	0.163221	0.163619	0.355448	15999	1842.97	3.11785	5.85e-36	1.46e-34	15670.4	1943.64	3.01117	4.78e-242	3.44e-239	14939.3	1931.16	2.95166	7.81e-40	2.82e-38	14689	2030.59	2.85529	1.76e-156	5.99e-154	13040.7	13735.8	-0.0748777
Aco027767	140.01	178.38	148.316	308.062	407.265	332.927	499.134	585.26	511.514	421.246	489.462	484.592	169.515	191.277	155.776	309.985	288.37	291.086	423.881	391.595	421.821	9234.84	4120.63	1.16422	4.13e-13	3.46e-11	12640.8	3622.13	1.80331	2.4e-33	5.33e-32	11623.2	3819.57	1.60565	1.67e-30	2.48e-29	11803	7589.56	0.637192	1.17e-05	4.12e-05	10892.9	7980.43	0.448988	0.000692559	0.00176424	9668.63	10852.9	-0.16672
Aco020872	151.07	199.02	183.875	280.492	266.317	238.21	460.581	522.087	428.423	517.353	511.391	492.29	223.741	232.857	242.833	389.112	363.797	342.119	410.886	367.54	327.314	6867.66	4682.05	0.552651	0.000119316	0.00118249	11101.2	4115.68	1.43155	1.8e-19	1.92e-18	12581.1	4340.65	1.53535	7.19e-31	1.08e-29	10365.6	5644.51	0.876948	1.21e-11	8.32e-11	11793.2	5934.58	0.990918	9.11e-24	1.16e-22	10469.3	9531.47	0.135455
Aco019823	223.164	263.922	273.827	179.57	215.699	173.25	124.882	109.474	146.042	80.2748	78.1899	81.3346	237.418	215.253	207.252	159.178	175.962	210.649	132.123	133.115	138.755	9155	12280.1	-0.423827	0.00291191	0.0169326	5510.95	10791.6	-0.969459	3.83e-09	1.84e-08	3650.53	11382.6	-1.64069	4.48e-44	1.11e-42	5145.74	7524.41	-0.547993	0.000426688	0.00118662	3421.8	7911.59	-1.20904	1.11e-25	1.56e-24	3037.69	4732.55	-0.639804
Aco024201	149.686	178.162	167.928	172.158	180.549	204.827	262.724	267.592	229.331	261.514	275.51	250.596	232.878	261.495	243.321	334.13	368.405	400.62	504.301	360.56	374.27	5835.34	5202.03	0.165908	0.186317	0.386742	7150.52	4571.76	0.645277	1.11e-06	4.1e-06	7794.64	4821.54	0.693087	7.46e-10	3.33e-09	6676.8	4794.59	0.477552	0.000157487	0.000470452	7306.22	5041.58	0.535116	3.11e-07	1.21e-06	6485.67	6140.06	0.0791515
Aco002506	44.7253	53.2733	57.4276	59.907	62.7383	65.7429	50.1698	43.871	54.1677	40.0506	35.0548	46.1365	63.7652	60.9673	59.3728	55.8158	55.4493	60.0432	58.556	59.1264	51.505	9645.25	7976.25	0.274097	0.0328092	0.11369	6827.34	7009.42	-0.0379492	0.808552	0.861879	5870.13	7393.63	-0.333	0.0328957	0.0587061	6374.96	7925.68	-0.314076	0.0123277	0.0257202	5502.11	8333.75	-0.599149	9.71e-07	3.59e-06	4884.78	5863.11	-0.263537
Aco004362	56.9476	67.3997	52.2456	75.2981	98.4864	83.8094	356.823	308.631	300.33	333.318	394.137	339.866	51.9247	62.4711	50.4682	370.69	259.179	263.593	641.8	536.955	463.137	3087.1	2121.58	0.541116	0.000866584	0.00628121	10408.5	1864.68	2.48103	1.34e-57	7.32e-56	12093.5	1966.1	2.62117	5e-75	2.88e-73	9719.14	2537.01	1.93797	1.56e-40	5.83e-39	11334.5	2667.69	2.08745	5.6e-57	2.44e-55	10060.5	8939.02	0.170596
Aco011660	241.199	249.494	232.109	305.427	318.509	295.317	290.254	349.138	311.745	459.341	445.851	393.605	275.395	303.513	273.123	412.842	440.197	444.203	529.227	484.147	511.821	7174.27	5656.74	0.342807	0.000207513	0.00189781	6675.61	4969.92	0.425756	0.000471237	0.00123079	9581.7	5241.01	0.870581	9.49e-17	7e-16	6233.13	5896.01	0.0803306	0.499025	0.599021	8982.43	6199.31	0.5352	8.25e-08	3.42e-07	7974.29	5731.25	0.476535
Aco000143	246.849	242.74	246.209	299.165	303.292	291.423	283.313	315.32	255.448	434.712	382.278	361.306	220.661	235.547	239.857	298.345	289.824	310.116	465.093	368.368	393.828	8154.32	6731.22	0.276598	0.00067371	0.00507411	7006.18	5913.11	0.244637	0.0461147	0.0822033	10159.8	6236.12	0.7042	3.94e-11	1.97e-10	6541.95	6701.29	-0.0347498	0.772515	0.834065	9525.14	7046.02	0.435053	1.99e-05	6.33e-05	8456.84	6015.6	0.491522
Aco006914	79.5745	78.594	78.9666	90.9537	102.188	91.5063	119.544	108.036	123.394	122.722	116.525	123.009	94.4662	93.5915	96.9961	116.619	112.237	114.265	159.833	146.741	136.26	7305.35	6102.59	0.259353	0.00888238	0.0416802	8102.8	5360.95	0.595972	3.86e-08	1.67e-07	8789.57	5653.75	0.636545	3.76e-15	2.5e-14	7565.93	6003.73	0.333818	0.00501211	0.0113888	8239.03	6312.7	0.384393	5.11e-05	0.000153612	7314.32	6958.31	0.0719294
Aco005631	150.471	168.988	163.592	332.878	312.073	295.156	282.116	293.373	288.759	221.757	248.829	281.814	215.238	225.257	220.504	246.478	229.655	212.64	192.709	167.84	205.327	11257.4	5799.5	0.956861	2.52e-20	6.11e-18	9308.99	5096.17	0.869268	4.34e-17	3.94e-16	8522.82	5374.62	0.665111	4.15e-07	1.44e-06	8692.12	9251.98	-0.0899982	0.392496	0.495787	7986.94	9727.56	-0.284493	0.015864	0.0315289	7089.38	7993.19	-0.173212
Aco011520	203.114	253.767	251.29	316.428	301.855	289.732	611.006	730.65	589.364	706.505	770.706	602.081	202.05	196.658	202.566	331.601	269.867	260.566	345.7	286.343	274.358	6978.85	5455.7	0.355196	0.00519104	0.0271077	13346.3	4795.06	1.47682	3.66e-21	4.3e-20	15109	5057.46	1.57897	2.7e-26	3.3e-25	12461.8	5735.47	1.11955	6.52e-19	8.11e-18	14163	6030.37	1.23191	1.87e-26	2.72e-25	12572.1	11458.4	0.133879
Aco007778	80.0962	104.711	91.1738	65.2977	80.0813	76.4083	129.666	119.195	117.022	126.189	119.506	146.966	126.183	130.215	122.805	226.509	207.843	178.207	148.345	146.364	111.351	4861.6	6062.98	-0.318606	0.032228	0.112206	7213.05	5329.66	0.436603	0.00281885	0.00649079	8138.83	5620.55	0.534112	0.000345964	0.000854475	6735.23	3994.95	0.7536	3.24e-09	1.76e-08	7628.22	4200.77	0.860706	9.95e-12	5.87e-11	6771.92	6194.29	0.128588
Aco003667	278.72	301.477	189.369	206.936	432.482	254.216	718.168	614.479	615.205	433.359	478.798	598.949	314.778	300.526	416.915	382.499	475.891	412.434	440.25	395.196	424.644	6175.51	5330.92	0.212097	0.461121	0.675407	12099.6	4684.78	1.369	2.69e-11	1.59e-10	9872.02	4938.28	0.999399	1.73e-06	5.65e-06	11298.2	5076.07	1.15448	1.22e-06	4.95e-06	9250.83	5337.87	0.793386	0.0299589	0.0557515	8211.26	10391.4	-0.33976
Aco005471	360.506	350.313	346.183	438.932	512.213	428.82	321.938	338.171	288.47	371.859	377.485	351.192	387.914	390.324	415.285	220.899	239.747	220.961	349.711	281.266	306.432	10843.5	8328.49	0.380577	0.000908848	0.00653015	6702.21	7316.12	-0.126519	0.257899	0.364442	8175	7715.49	0.0835323	0.322152	0.428066	6258.16	8911.95	-0.509957	7.73e-05	0.000242984	7662.98	9370.54	-0.290023	0.00657218	0.0141549	6802.59	5754.91	0.241427
Aco007595	0	0	0.0302637	0.299186	0.303821	0	195.174	129.943	130.208	122.772	292.613	218.694	0.507567	0.343308	0.752333	682.922	341.313	345.464	1561.87	1371.96	927.429	5.67015	0.284219	4.07834	0.0793114	0.214726	3849.19	0.249436	13.6783	4.69e-30	8.96e-29	5641.06	0.264016	14.1531	3.07e-31	4.68e-30	3594.45	4.66701	9.61735	3.51e-26	6.92e-25	5283.48	4.90475	10.0959	5.1e-23	6.28e-22	4686.92	3306.69	0.503289
Aco005958	259.064	289.402	290.737	334.416	328.122	329.521	226.121	224.162	228.089	233.033	235.704	245.597	216.096	231.279	220.719	229.386	229.509	223.268	225.779	217.741	200.01	10812.7	9170.31	0.237676	0.0107026	0.048149	6650.94	8057.97	-0.276839	0.0082159	0.0172899	7362.47	8498.61	-0.20708	0.035636	0.0630972	6210.24	8885.69	-0.516816	5.11e-08	2.44e-07	6900.83	9342.8	-0.437142	5.17e-08	2.19e-07	6125.96	5711.1	0.101109
Aco006291	69.8625	124.845	84.8665	128.262	98.5896	110.524	817.189	1079.05	878.278	835.341	1004.98	858.815	122.269	138.364	123.328	609.223	426.548	470.792	650.17	687.541	692.936	2052.77	1704.74	0.268385	0.241337	0.456457	15183.7	1499.74	3.34	4.94e-44	1.67e-42	15534.6	1581.33	3.29659	4.21e-52	1.32e-50	14177.1	1686.97	3.07082	6.17e-87	8.64e-85	14559.4	1773.63	3.03684	2.1e-121	3.98e-119	12922.7	13034.6	-0.0124352
Aco004279	114.306	123.385	123.351	164.863	177.298	149.864	172.488	154.513	156.86	172.454	179.361	195.459	111.065	122.889	127.824	145.513	146.623	132.756	147.087	136.496	118.735	9180.98	6754	0.442751	6.11e-05	0.000675367	8120.66	5934.34	0.452471	3.37e-05	0.000104093	9656.75	6258.7	0.625612	1.17e-09	5.16e-09	7582.73	7545.78	0.00714061	0.953009	0.966668	9050.66	7933.83	0.190116	0.0771128	0.129417	8034.14	6973.87	0.204182
Aco010553	77.3201	87.5709	85.7977	99.2585	99.3601	97.9965	120.254	123.982	130.304	131.659	142.931	131.257	143.792	137.659	143.625	255.134	231.046	231.978	206.63	201.072	178.862	5485.49	4648.02	0.238992	0.0131234	0.0562072	6230.86	4084.39	0.609412	5.55e-08	2.38e-07	7097.27	4307.64	0.720431	6.02e-12	3.23e-11	5817.92	4507.93	0.368159	0.000297512	0.000849886	6652.25	4739.85	0.489102	2.07e-08	9.12e-08	5904.98	5350.14	0.142311
Aco018682	5.41879	14.3276	5.61893	42.261	11.062	26.5291	388.366	409.674	526.673	232.406	307.26	326.006	42.0398	66.9033	69.9748	544.693	405.74	472.635	346.453	635.055	417.113	888.31	282.893	1.65136	0.0175578	0.0705803	13273.1	249.174	5.73683	1.22e-56	6.36e-55	9120.56	262.604	5.11891	1.08e-22	1.1e-21	12393.1	730.004	4.0852	8.29e-16	8.03e-15	8545.85	767.334	3.47699	7.22e-12	4.32e-11	7584.45	11396.4	-0.587568
Aco003345	109.576	166.498	143.216	189.298	195.846	190.727	14.3061	12.4369	18.019	11.2368	11.0262	11.0852	128.452	110.131	129.642	18.6735	33.366	28.1733	10.8001	12.8473	12.7569	19336.6	14107.6	0.454878	0.00586302	0.02982	1352.58	12405.1	-3.19685	6.49e-49	2.66e-47	1058.73	13082.8	-3.62725	6.65e-101	6.92e-99	1262.93	15890.6	-3.65276	2.96e-124	9.01e-122	992.409	16708.2	-4.07345	0	0	881.003	1161.52	-0.399336
Aco010390	451.815	777.495	638.891	923.061	882.714	753.792	5.11282	5.87819	7.53517	1.68605	2.41943	2.87415	583.034	524.252	584.615	44.8939	210.416	119.65	12.8632	20.0153	24.6969	20160.1	14741.6	0.451608	0.0271309	0.0985508	131.293	12966.1	-6.62313	3.36e-152	1.46e-149	52.0278	13674.4	-8.04306	1.23e-208	6.01e-206	122.586	16570.2	-7.07339	0	0	48.7415	17421.5	-8.48971	0	0	43.2551	112.72	-1.38746
Aco006905	52.7296	55.627	51.8761	77.2945	92.9175	81.072	331.476	308.472	219.948	199.769	231.201	235.04	38.3571	44.2366	40.3388	162.226	123.045	115.346	295.451	228.527	180.412	4755.08	3040.02	0.645239	5.25e-08	1.45e-06	14628.7	2671.02	2.45334	2.33e-41	7.19e-40	11918.5	2816.75	2.08117	1.93e-75	1.13e-73	13660.1	3907.83	1.80559	8.77e-26	1.7e-24	11169.5	4109.01	1.44292	2.04e-34	4.26e-33	9914.13	12563.1	-0.341577
Aco010265	133.462	141.339	161.82	161.996	163.336	169.201	157.859	145.369	152.198	95.2117	96.2518	108.301	140.943	135.104	157.603	117.448	119.625	121.07	132.939	112.638	104.863	9680.7	8568.82	0.175965	0.116171	0.28091	8019.85	7528.21	0.0912037	0.463993	0.582991	5549.63	7940.96	-0.517071	3.25e-05	9.18e-05	7488.52	7955.07	-0.0872336	0.387655	0.490895	5201.38	8364.49	-0.685563	6.06e-13	3.96e-12	4617.29	6887.05	-0.576942
Aco017782	128.384	133.811	134.881	152.352	205.045	179.685	134.268	98.9157	113.92	115.631	99.5579	119.902	161.042	168.635	186.106	122.39	138.573	112.326	185.233	151.082	171.029	9818.75	7277.16	0.432069	0.00196406	0.0122748	5707.67	6393.51	-0.163765	0.279833	0.38973	5790.76	6742.93	-0.219717	0.0506012	0.0864609	5329.72	8068.79	-0.598278	0.000291003	0.000832857	5428.21	8484.58	-0.644331	2.47e-06	8.7e-06	4819.32	4902.52	-0.0246809
Aco015522	193.157	234.7	236.725	434.702	322.405	330.217	743.224	756.705	621.976	508.565	529.561	526.414	319.721	331.325	313.76	482.235	482.629	401.798	826.882	914.696	833.091	6017	3687.18	0.70655	1.7e-05	0.000226349	10561.8	3240.48	1.70454	5.04e-30	9.61e-29	8188.75	3417.85	1.26055	1.89e-25	2.22e-24	9862.18	4945.36	0.995759	2.32e-10	1.42e-09	7675.28	5199.17	0.561889	2.07e-05	6.57e-05	6813.3	9069.37	-0.412574
Aco012215	184.658	214.784	219.407	222.807	235.167	236.62	131.943	127.912	133.156	135.501	128.188	140.825	160.591	164.687	152.266	96.5837	103.646	91.4169	90.1302	86.3379	86.6793	12003.2	10720.2	0.163069	0.136401	0.314938	6109.18	9420.58	-0.624825	1.73e-07	7.01e-07	6609.66	9936.15	-0.588167	2.69e-07	9.52e-07	5704.39	9863.63	-0.790018	1.85e-15	1.75e-14	6195.51	10371.4	-0.743382	3.64e-17	3.2e-16	5500.14	5246	0.068169
Aco008997	336.638	339.659	365.104	470.992	561.218	466.851	72.2714	99.0849	63.0331	127.44	101.846	105.878	290.739	316.806	313.673	141.412	196.622	167.839	100.453	70.7355	95.6018	16459.9	11463.7	0.52177	1.38e-05	0.000188893	2313.13	10070.8	-2.1224	9.58e-29	1.7e-27	3477.62	10621.8	-1.6108	6.65e-39	1.39e-37	2159.83	13527.8	-2.64706	5.21e-49	2.71e-47	3260.58	14224	-2.12498	1.84e-61	9.18e-60	2895.12	1985.69	0.54418
Aco004189	8.94282	5.49585	2.88398	12.2062	2.27485	12.1295	642.536	786.659	1017.96	791.224	815.125	852.535	9.93285	6.81574	3.91485	337.384	170.361	233.779	571.613	854.264	559.063	209.695	137.314	0.612892	0.308239	0.533146	17371.7	120.492	7.17299	1.75e-88	2.16e-86	18344.8	126.963	7.17642	9.62e-117	1.43e-114	16219.6	172.224	6.55615	4.47e-21	6.43e-20	17194.2	181.066	6.568	1.39e-22	1.68e-21	15263.2	14913.5	0.0333616
Aco008443	138.801	138.01	138.171	135.801	145.537	137.226	77.3915	73.5746	73.9915	118.236	124.421	116.881	149.794	150.93	164.347	150.026	161.988	140.852	107.902	103.432	95.9916	8559.3	8509.61	0.00829144	0.923053	0.965653	4137.69	7475.56	-0.853412	7.68e-21	8.86e-20	6951.61	7883.85	-0.181513	0.0275106	0.0498732	3863.56	7034.05	-0.864392	6.37e-17	6.71e-16	6515.88	7396.02	-0.182636	0.0360597	0.0658766	5784.08	3553.15	0.703085
Aco017641	147.952	152.799	170.572	179.534	134.961	148.859	449.602	482.213	547.811	610.89	628.686	558.113	192.28	209.437	236.134	508.27	413.781	490.767	660.971	592.519	562.88	3271.92	3337.68	-0.0286345	0.845209	0.926122	9401.77	2932.23	1.68092	2.42e-35	5.89e-34	12004.4	3092.85	1.95646	3.18e-71	1.71e-69	8778.56	2688.96	1.70685	3.42e-30	8.39e-29	11252.7	2827.05	1.99273	3.28e-56	1.39e-54	9989.21	8072.46	0.307301
Aco012326	134.214	100.006	98.5561	147.342	140.953	131.143	219.928	213.795	207.369	196.209	213.597	238.215	136.818	136.554	137.166	99.9297	126.389	108.839	137.975	122.867	152.066	7407.53	5898.03	0.328732	0.0401956	0.131879	10184	5177.96	0.975834	2.16e-09	1.07e-08	10824.9	5459.79	0.987401	1.41e-09	6.17e-09	9509.25	6087.96	0.643431	1.59e-09	8.96e-09	10144.8	6400.92	0.664392	1.6e-09	7.8e-09	9004.96	8745.11	0.0422028
Aco002475	240.859	333.386	173.007	434.911	660.4	557.525	307.299	402.242	298.305	347.763	476.393	299.074	439.86	584.89	440.775	894.09	981.928	800.061	934.029	785.778	784.921	8088.85	3665.65	1.14197	7.21e-06	0.000108375	4433.28	3223.54	0.459863	0.0760567	0.128102	5196.21	3397.63	0.613122	0.0186177	0.0349437	4139.44	6647.12	-0.683243	0.000238917	0.000692814	4870.1	6989.87	-0.521146	0.00693919	0.0148787	4322.16	3805.87	0.183669
Aco001866	109.837	125.503	113.26	179.552	177.453	188.673	81.6675	82.1431	79.7108	63.2096	58.469	62.3109	76.3304	79.0797	66.1021	67.1147	61.8736	58.0933	74.3317	76.1729	75.2002	15054.5	9643.03	0.642732	8.92e-11	4.73e-09	6043.22	8474.14	-0.487711	7.58e-06	2.54e-05	4799.43	8936.48	-0.896816	3.82e-18	3.06e-17	5642.8	12370.7	-1.13251	1.15e-31	2.98e-30	4498.94	13007.4	-1.53177	1.08e-71	6.94e-70	3994.09	5189.21	-0.377659
Aco011134	29.6573	28.6823	19.5793	22.871	30.2385	22.4138	177.335	149.397	100.719	116.96	128.543	128.312	40.1873	41.5272	39.1351	103.095	70.2101	63.5981	466.093	422.389	361.038	1684.48	1743.15	-0.049586	0.815929	0.910544	8569.76	1531.4	2.48451	2.92e-22	3.67e-21	7882.69	1614.33	2.28808	9.51e-38	1.91e-36	8002.53	1384.51	2.53144	1.39e-32	3.72e-31	7387.89	1455.77	2.3444	4.17e-64	2.24e-62	6557.85	7360.56	-0.16648
Aco003509	64.2319	72.177	69.5872	79.6284	76.919	79.4004	171.42	156.016	165.808	211.998	200.591	210.196	101.447	106.747	118.79	214.017	179.109	170.015	352.815	276.549	250.143	3987.37	3490.38	0.192189	0.0453441	0.144025	7498.75	3067.1	1.28983	1.02e-30	2.02e-29	9951.47	3234.67	1.62136	7.4e-64	3.21e-62	7001.95	3276.69	1.09545	9.2e-26	1.78e-24	9328.25	3445.26	1.43688	4.93e-68	2.95e-66	8281.32	6439.62	0.362889
Aco023565	77.6334	114.491	92.4748	168.031	166.734	139.702	112.245	108.685	97.3975	135.608	136.056	144.174	108.62	116.81	114.529	183.588	166.892	152.59	210.906	168.795	134.162	9123.61	5484.26	0.734321	1.97e-05	0.000257591	5505.01	4822.33	0.191047	0.286591	0.397362	7561.07	5085.35	0.572321	0.000406726	0.000995252	5140.33	7498.99	-0.544813	2.8e-05	9.38e-05	7086.97	7884.35	-0.153704	0.157584	0.239396	6291.23	4727.3	0.412424
Aco028788	324.673	391.755	400.018	468.163	558.093	454.802	595.869	737.153	731.091	756.654	819.087	601.908	172.71	186.928	222.969	195	177.206	214.852	314.399	285.138	328.526	9374.68	7082.21	0.404441	0.00444058	0.0239441	11749.5	6224.09	0.916699	2.99e-09	1.45e-08	13027.7	6564.83	0.988793	3.68e-10	1.68e-09	10970.5	7704.88	0.509949	0.000383467	0.00107609	12212.6	8101.36	0.592313	2.91e-05	9.03e-05	10840.9	10087	0.104005
Aco000658	611.197	364.128	384.696	440.101	522.931	387.066	1322.06	1337.31	1237.34	1518.3	1493.14	1511.79	1185.62	1102.62	1215.02	1290.79	1284.17	1493.3	1882.2	1339.72	1449.53	3214.73	3250.74	-0.0162614	0.944078	0.975353	8343.3	2852.35	1.54843	2.55e-12	1.63e-11	10181.3	3007.44	1.75928	8.78e-18	6.88e-17	7790.51	2642.39	1.56034	1.04e-27	2.19e-26	9543.44	2778.28	1.78094	6.06e-45	1.83e-43	8472.09	7164.26	0.241954
Aco008764	20.729	32.4669	28.6803	30.6545	27.8367	37.7739	25.0906	26.6984	26.5966	32.256	28.884	33.3448	33.9171	34.4489	30.9764	37.5272	29.5659	33.0282	28.8823	29.7383	35.695	8034.48	6848.29	0.230582	0.245761	0.461732	5885.73	6022.09	-0.032989	0.862182	0.903654	7457.64	6351.39	0.231665	0.201886	0.288862	5495.67	6600.72	-0.264489	0.061227	0.106531	6990.6	6940.78	0.0100638	0.939611	0.957639	6206.26	5053.67	0.296276
Aco004163	180.939	166.239	190.012	155.312	128.6	163.696	273.451	258.909	303.01	249.055	229.794	214.767	168.963	167.588	188.508	141.698	157.715	167.475	148.265	141.247	152.082	6248.2	7521.75	-0.267468	0.0463147	0.146499	10493.4	6606.36	0.667544	7.34e-08	3.1e-07	9154.51	6968	0.393714	0.000309684	0.000770411	9798.04	5133.86	0.932287	9.25e-12	6.44e-11	8582.18	5398.01	0.6687	2.82e-08	1.23e-07	7619.3	9010.81	-0.242005
Aco001937	58.8155	52.0979	40.1197	331.84	294.721	146.595	158.015	141.478	139.013	89.5655	112.168	106.82	95.888	96.5088	91.3586	364.33	311.265	238.081	332.123	303.244	305.151	11171.4	2189.48	2.35116	5.16e-16	6.86e-14	5698.53	1923.04	1.56735	2e-18	1.99e-17	4216.65	2027.35	1.05665	2.89e-09	1.23e-08	5321.06	9186.69	-0.78777	0.0015926	0.00399906	3951.47	9656.95	-1.28911	6.97e-08	2.92e-07	3507.12	4893.81	-0.480636
Aco001047	99.081	80.413	96.7705	129.397	159.162	145.742	96.0838	109.397	92.5349	91.1097	97.7006	98.4743	126.057	124.155	114.845	120.241	145.904	125.576	75.0835	62.0915	69.6989	10329.1	6589.74	0.648298	5.25e-06	8.19e-05	6372.97	5786.18	0.139252	0.327314	0.442886	6460.46	6102.86	0.0820179	0.503953	0.610998	5950.65	8488.16	-0.512372	0.000105928	0.000324953	6055.08	8925.37	-0.559704	3.82e-07	1.47e-06	5374.9	5471.76	-0.0257542
Aco001538	328.379	370.688	339.942	474.951	470.214	484.753	224.293	234.988	207.669	340.502	331.775	303.753	51.5028	55.7653	62.2438	39.6437	51.2592	49.3817	26.5674	20.1144	20.6624	17310.3	12611.6	0.456944	7.89e-07	1.58e-05	7261.58	11082.5	-0.609948	1.14e-07	4.7e-07	11170.5	11687.3	-0.065157	0.528016	0.633592	6780.44	14224.9	-1.06905	4.13e-25	7.61e-24	10471.6	14956.9	-0.514279	3.08e-09	1.47e-08	9296.23	6235.21	0.57632
Aco002389	86.6346	67.1998	50.3635	124.727	172.163	111.659	296.374	280.55	332.879	262.089	264.274	281.694	154.353	172.48	193.765	256.557	308.486	268.689	285.225	283.638	247.307	5084.58	2549.95	0.995593	4.04e-05	0.000476419	10183.2	2238.92	2.18545	1.07e-23	1.44e-22	9506.32	2360.15	2.01012	1.95e-24	2.2e-23	9508.38	4179.59	1.18616	2.92e-11	1.94e-10	8910.15	4394.63	1.02006	1.5e-10	8.03e-10	7909.65	8744.41	-0.144852
Aco002990	24.9927	33.3957	28.5489	62.406	75.626	61.9246	110.592	106.256	113.776	84.8904	83.8161	87.3841	49.7011	52.5641	57.8911	121.727	101.111	82.3454	126.806	137.659	115.961	6475.3	2821.35	1.19855	1.87e-14	1.88e-12	9629.66	2480.24	1.95719	1.75e-39	5.15e-38	7840.19	2615.58	1.58393	3.97e-31	6.03e-30	8991.59	5321.87	0.756876	3.16e-09	1.72e-08	7348.83	5595.76	0.393434	0.000476294	0.00124369	6523.79	8269.09	-0.342077
Aco014017	74.9722	81.4923	98.0673	283.353	190.59	125.264	219.07	176.267	203.802	164.728	201.262	185.381	91.2241	87.3821	114.368	157.77	166.928	175.169	233.314	159.896	177.022	9833.99	4188.17	1.23138	5.79e-06	8.9e-05	8848.1	3679.67	1.26569	4.71e-15	3.75e-14	8560.29	3881.72	1.14085	1.73e-14	1.1e-13	8262.03	8086.18	0.031081	0.899455	0.929573	8022.35	8499.66	-0.0833289	0.717138	0.790007	7120.39	7599.23	-0.0938801
Aco024698	168.427	200.889	157.203	190.538	256.113	251.093	285.539	296.593	275.605	205.799	199.762	231.147	229.361	211.749	184.395	137.614	133.502	112.732	231.705	310.758	237.514	8430.26	6377.33	0.402675	0.0160938	0.0660081	9319.16	5605.17	0.733547	1.6e-07	6.51e-07	7273.61	5910.12	0.299538	0.0299598	0.0539056	8701.67	6926.93	0.329096	0.0226266	0.0441384	6817.38	7284.13	-0.0955606	0.486903	0.595554	6052.02	8001.99	-0.403017
Aco009284	127.637	148.177	146.172	145.645	169.598	151.303	261.06	245.44	230.04	230.743	234.888	234.473	114.729	116.32	122.571	199.365	189.915	220.558	370.312	285.639	294.645	6037.48	5473.7	0.141285	0.240071	0.455106	8571.73	4810.17	0.833463	1.29e-11	7.84e-11	8565.65	5073.2	0.755683	3.86e-13	2.26e-12	8003.92	4961.69	0.689974	9.34e-09	4.85e-08	8028.75	5217.1	0.622158	2.34e-10	1.23e-09	7127.22	7360.96	-0.0464716
Aco006434	61.006	73.6962	93.2857	112.457	126.67	106.384	268.428	256.426	307.588	227.644	226.618	225.627	61.7414	60.854	67.6703	142.512	111.291	100.714	239.559	210.523	204.785	5941.95	3928.65	0.596692	0.000834732	0.00608027	12878.4	3452.26	1.89927	1.55e-23	2.07e-22	11054	3642.27	1.60154	1.3e-21	1.26e-20	12024.9	4883.57	1.30025	7.54e-23	1.22e-21	10361.5	5134.8	1.01317	1.37e-23	1.74e-22	9198.19	11058.7	-0.265821
Aco000300	72.9434	80.7138	62.3355	134.789	172.35	135.823	411.687	396.781	349.009	371.525	428.361	434.672	88.5054	96.692	91.0871	191.168	170.29	145.447	347.435	263.355	260.2	5381.36	2630.86	1.03245	2.35e-10	1.14e-08	12643.4	2311.93	2.45143	8.33e-59	4.71e-57	14182.2	2437.6	2.5408	2.37e-72	1.3e-70	11805.9	4422.85	1.41667	1.36e-22	2.17e-21	13291	4650.52	1.51526	1.29e-30	2.29e-29	11797.2	10857.3	0.119814
Aco001939	37.1703	34.2447	25.7173	187.521	177.569	94.5741	133.716	111.863	106.073	73.0206	99.7354	100.459	81.7807	84.617	92.4797	493.897	399.186	295.744	476.407	396.135	309.273	6548.51	1388.18	2.23801	7.39e-17	1.13e-14	4505.39	1219.38	1.88572	4.3e-23	5.63e-22	3682.06	1285.51	1.51836	1.17e-14	7.54e-14	4207.03	5384.71	-0.35597	0.129031	0.201217	3450.03	5660.59	-0.714237	0.00181913	0.00434395	3061.83	3869.47	-0.337712
Aco011771	71.5813	98.238	99.7344	85.0603	88.1259	91.1267	437.76	477.288	321.12	420.024	427.91	467.341	92.5105	102.827	104.516	288.994	196.346	194.563	659.941	650.145	462.329	2544.6	2600.51	-0.0313421	0.843438	0.925214	10699.6	2286	2.22663	3.79e-26	5.86e-25	11974.8	2411.28	2.31212	2.96e-48	8.31e-47	9990.91	2090.99	2.25633	1.46e-44	6.39e-43	11223.5	2198.62	2.3517	2.28e-139	5.62e-137	9963.14	9187.23	0.117029
Aco007391	140.969	165.186	172.282	257.966	294.64	247.8	154.85	152.769	136.843	157.917	150.298	150.234	134.481	142.583	144.347	118.878	121.58	127.943	172.693	155.363	158.333	12248	7337.71	0.739031	1.82e-08	5.72e-07	6116.01	6448.18	-0.0763835	0.567081	0.672359	6631.57	6801.28	-0.0364591	0.753292	0.813618	5710.84	10066.3	-0.817732	4.54e-11	2.96e-10	6216.43	10584.2	-0.767584	1.13e-13	7.84e-13	5518.75	5251.88	0.0716459
Aco023487	59.4232	76.6557	65.3549	78.6949	46.0303	79.2487	390.227	435.642	498.197	359.84	352.556	357.401	61.7106	58.0691	60.2623	260.644	189.969	249.009	346.272	387.119	385.988	2391.87	2369	0.0143491	0.949809	0.978235	13975.4	2082.43	2.74675	5.57e-63	3.58e-61	11867.4	2196.02	2.4343	3.8e-82	2.55e-80	13048.9	1965.08	2.73079	6.36e-40	2.31e-38	11124	2066.1	2.42805	2.7e-40	7.01e-39	9875.25	11999	-0.2811
Aco018552	140.076	130.303	176.285	81.4379	94.7799	105.581	22.1961	18.2509	25.8459	19.3854	18.7102	22.9474	205.949	197.425	241.634	41.987	79.0082	57.3065	32.116	26.5526	39.9172	7778.76	12361.4	-0.66824	5.46e-05	0.000615248	1646.7	10856.8	-2.72077	2.07e-45	7.49e-44	1593.56	11453.7	-2.84583	1.16e-70	6.11e-69	1537.59	6391.17	-2.05517	1.93e-34	5.53e-33	1493.55	6720.65	-2.1703	1.26e-57	5.54e-56	1325.87	1414.18	-0.0936249
Aco028583	93.2462	113.809	108.105	112.788	123.526	121.601	222.149	238.368	257.224	233.834	254.156	255.152	152.569	177.136	166.005	325.075	300.822	336.987	362.554	366.598	425.616	4039.8	3565.65	0.180119	0.135264	0.313166	7287.22	3133.8	1.21758	5.68e-19	5.87e-18	7932.04	3305.09	1.26305	1.5e-25	1.77e-24	6804.21	3319.72	1.03552	4.95e-19	6.2e-18	7434.21	3490.63	1.09074	1.17e-30	2.09e-29	6599.03	6256.92	0.0766645
Aco003435	165.992	91.8797	83.2894	140.864	143.526	127.932	137.73	166.945	132.891	94.9759	107.507	119.092	161.571	145.253	167.651	107.95	120.846	90.6457	123.908	119.604	121.171	8166.54	6786.81	0.266981	0.298277	0.522467	7792.71	5953.92	0.388283	0.156572	0.23938	6024.43	6276.37	-0.059128	0.817744	0.865556	7276.26	6711.83	0.116544	0.37966	0.483039	5645.67	7056.95	-0.321913	0.00603806	0.0130987	5011.19	6690.35	-0.416988
Aco008861	169.613	218.269	208.572	286.4	271.944	253.234	283.65	326.496	275.516	276.512	252.875	286.634	211.352	221.63	212.01	287.913	291.262	280.044	391.158	318.769	273.452	7733.26	5696.61	0.440948	0.00104017	0.00729323	7589.4	5007.19	0.599994	8.66e-05	0.000253076	7352.25	5281.05	0.477356	0.000461297	0.00112139	7086.45	6355.68	0.157049	0.197188	0.286411	6891.71	6682.39	0.0445215	0.657418	0.739662	6118.37	6516.1	-0.0908849
Aco022163	240.755	56.2396	52.8843	78.0291	183.419	134.688	120.438	89.1055	87.9235	85.1494	105.376	107.808	322.478	256.609	284.635	187.172	207.285	134.962	155.861	91.3315	126.923	6527.54	5799.43	0.170614	0.814581	0.909699	4406.29	5077.42	-0.204543	0.785759	0.843045	4647.33	5350.05	-0.203159	0.785196	0.839174	4114.58	5364.01	-0.382525	0.145411	0.222398	4354.92	5641.18	-0.373259	0.122692	0.193278	3865.22	3784.83	0.0304299
Aco009744	137.394	177.838	154.347	149.403	204.985	190.248	280.867	327.613	246.881	184.635	249.197	205.925	175.703	194.462	175.154	364.346	370.065	305.065	502.712	387.783	357.311	5387.39	4655.01	0.210786	0.210227	0.419315	7606.13	4091.91	0.894418	1.24e-07	5.11e-07	5984.43	4315.21	0.47187	0.00405683	0.00855656	7102.13	4426.9	0.681989	3.5e-05	0.000115649	5608.08	4655.14	0.268794	0.0853385	0.141285	4977.14	6530.45	-0.391783
Aco012422	200.361	287.797	205.737	603.193	499.068	517.162	523.915	668.869	492.473	315.858	242.674	253.795	77.7777	94.8331	88.4862	54.799	65.7552	53.8638	49.394	35.901	57.7527	16342.1	7019.79	1.21919	3.56e-12	2.51e-10	15293.1	6172.64	1.30898	1.77e-10	9.76e-10	7748.29	6508.3	0.251703	0.174134	0.254277	14279.5	13430.6	0.088401	0.561706	0.655894	7265.07	14120.6	-0.958728	4.12e-13	2.72e-12	6451.01	13129.1	-1.02513
Aco002118	287.727	292.429	308.39	343.061	384.093	337.24	237.181	275.251	196.197	319.889	309.947	301.553	233.991	249.704	260.713	275.434	297.428	287.78	376.536	275.071	238.056	8991.74	7525.77	0.256575	0.0133274	0.0568587	5381.71	6611.48	-0.297018	0.0591829	0.102461	7438.02	6973.09	0.0931132	0.277252	0.377875	5025.14	7389.81	-0.556405	0.000228758	0.00066562	6972.37	7770.05	-0.156063	0.105181	0.169575	6189.76	4620.66	0.421933
Aco013356	28.457	26.3883	20.5166	219.4	178.895	103.361	483.782	595.535	624.387	483.245	440.136	416.692	22.1678	30.0314	28.6959	331.078	247.09	177.284	162.179	149.195	183.755	5744.16	865.757	2.73017	5.35e-24	2.08e-21	17548	760.487	4.52871	4.57e-135	1.37e-132	14504.7	801.762	4.17783	7.57e-166	2.45e-163	16384.6	4723.3	1.79461	4.42e-14	3.73e-13	13598	4965.08	1.45367	2.11e-11	1.21e-10	12072.5	15065.1	-0.319511
Aco014840	94.2724	68.1623	64.2508	69.4088	77.2228	72.6669	154.729	165.794	221.876	203.864	190.21	198.264	164.184	160.821	179.388	205.075	215.285	235.819	180.554	175.092	196.306	3464.85	3594.48	-0.0530319	0.765499	0.881663	7710.69	3155.43	1.2891	3.96e-09	1.9e-08	8847.58	3326.96	1.41109	3.25e-17	2.47e-16	7199.44	2847.37	1.33846	1.17e-16	1.2e-15	8293.68	2993.94	1.47023	1.03e-56	4.42e-55	7362.96	6620.34	0.153233
Aco006554	104.601	66.8296	66.6075	81.9658	90.793	87.2468	61.356	52.1312	54.9807	63.3247	62.0598	78.2189	129.615	106.142	121.651	105.808	150.971	107.335	62.1193	58.601	48.7872	7440.03	6837.8	0.121761	0.545707	0.741005	4336.25	6000.79	-0.468733	0.0289937	0.0543198	5510.03	6326.92	-0.199508	0.338416	0.445915	4049.03	6114	-0.594567	7.26e-07	3.01e-06	5164.03	6428.75	-0.316155	0.00931848	0.019446	4584.19	3724.07	0.299723
Aco012107	29.5077	6.80263	4.53676	25.7765	25.255	12.8053	249.007	235.74	260.781	203.044	177.167	211.255	17.4125	13.6459	14.6678	151.927	97.7776	65.8933	267.813	211.401	181.642	1452.98	935.982	0.634426	0.456078	0.671446	15262.5	819.341	4.21938	6.07e-07	2.3e-06	12726.3	863.154	3.88204	4.58e-06	1.42e-05	14251.2	1194.79	3.57699	8.78e-54	5.47e-52	11929.4	1256.01	3.2484	3.02e-49	1.04e-47	10591.1	13106.2	-0.307454
Aco015871	181.398	212.532	201.146	348.765	423.335	356.41	543.55	561.475	431.635	433.175	402.565	494.231	134.389	152.723	138.073	263.576	220.359	226.336	144.154	136.251	92.6538	9941.17	5254.31	0.91983	1.53e-12	1.15e-10	12170	4617.55	1.39811	6.12e-20	6.67e-19	11077.4	4869.82	1.18566	3.15e-20	2.79e-19	11363.8	8170.13	0.476059	0.00132471	0.00337022	10382.7	8590.69	0.273403	0.0284769	0.0533115	9217.35	10450.2	-0.181095
novel.505	88.4908	100.513	104.576	103.666	110.814	113.141	148.281	143.574	156.198	152.039	148.553	158.976	91.3419	95.5054	97.0326	151.84	148.724	159.503	174.165	157.757	166.505	6121.38	5498.84	0.154706	0.16357	0.355417	7530.85	4831.93	0.640232	1.1e-07	4.53e-07	8119.32	5096.43	0.671809	8.02e-10	3.57e-09	7031.82	5030.14	0.483341	5.93e-06	2.18e-05	7610.42	5289.12	0.524882	3.87e-09	1.83e-08	6756.06	6466.75	0.0630429
Aco000413	93.173	96.1093	87.8812	110.763	122.75	114.032	248.567	249.114	213.369	222.19	270.4	280.997	118.193	129.593	150.302	267.237	241.552	227.317	328.332	312.464	268.229	4401.56	3519.89	0.322426	0.00173512	0.0110599	8097.96	3092.52	1.3888	3.74e-30	7.19e-29	9267.06	3261.13	1.50677	2.06e-30	3.04e-29	7561.5	3617.2	1.06386	9.2e-19	1.13e-17	8684.06	3803.38	1.19117	4.32e-23	5.35e-22	7707.67	6953.73	0.14853
Aco016665	55.7067	55.1346	62.6509	51.1778	54.5196	59.8657	58.1896	45.8621	57.7376	45.6115	40.7837	51.7964	64.6433	63.4392	61.8614	47.4684	47.181	48.3496	41.8785	48.1298	45.5323	7521.09	7902.57	-0.0713659	0.538335	0.735793	6613.05	6941.93	-0.0700438	0.638276	0.732339	5936.54	7322.19	-0.302816	0.0217742	0.0403221	6174.98	6179.85	-0.00117125	0.99338	0.995164	5564.36	6498.17	-0.224017	0.0664945	0.113642	4939.98	5679.66	-0.20141
Aco007124	69.6179	78.5462	91.218	68.6512	39.368	69.9218	147.958	173.613	494.794	131.591	156.865	118.486	150.954	145.664	180.211	264.996	184.419	254.659	571.672	496.707	487.408	2087.73	2816.76	-0.431689	0.0658868	0.189005	8632.54	2474.98	1.80241	1.08e-05	3.56e-05	4516.88	2610.81	0.790813	1.05e-06	3.5e-06	8059.32	1715.17	2.23226	0.000493004	0.00135737	4233.69	1803.35	1.23067	1.75e-09	8.5e-09	3757.83	7410.62	-0.979718
Aco000445	78.7386	72.2861	93.2975	57.1362	63.1066	67.6783	119.995	106.126	148.773	99.4014	88.0399	104.439	110.262	110.944	125.157	132.535	129.026	141.031	139.545	128.177	144.372	4211.2	5489.81	-0.382584	0.00735574	0.035872	7559.93	4821.53	0.648869	0.000379995	0.00100802	6184.47	5086.24	0.281864	0.0447895	0.0774974	7058.88	3460.24	1.02861	5.85e-11	3.77e-10	5797.13	3638.5	0.671816	4.41e-09	2.08e-08	5146.73	6492	-0.335161
Aco018451	113.944	161.694	151.821	221.865	240.911	270.27	20.9575	18.0194	60.1691	22.7132	16.8657	18.3244	261.879	251.81	330.31	118.516	206.954	167.439	35.3141	32.5976	36.3637	12643.3	7388.25	0.775114	2.65e-06	4.5e-05	1540.61	6495.42	-2.07562	5.83e-07	2.22e-06	943.816	6850.83	-2.85954	3.44e-55	1.18e-53	1438.35	10388.2	-2.85233	2.07e-06	8.14e-06	884.971	10923.5	-3.62549	1.8e-152	5.7e-150	785.83	1322.77	-0.751424
Aco016170	159.969	94.9262	93.3692	136.79	160.672	179.073	22.7572	18.2382	30.6472	24.1903	21.708	24.249	215.278	180.596	190.165	35.694	56.3264	34.4764	62.6754	46.4878	70.6482	12157.3	8921.41	0.4465	0.0567678	0.170163	1645.07	7827.95	-2.2503	8.09e-16	6.76e-15	1691.95	8252.91	-2.28627	3.88e-25	4.5e-24	1536.04	9988.62	-2.70072	1.13e-42	4.64e-41	1586.02	10503.6	-2.72758	2.1e-104	2.69e-102	1408.08	1412.76	-0.00530232
Aco018093	70.1812	79.0922	89.6346	56.177	50.285	60.4076	171.122	157.997	173.706	155.911	154.826	178.349	72.5471	64.5391	72.5061	106.512	100.561	141.427	118.903	99.2633	126.14	3765.07	5404.22	-0.521237	0.000180187	0.00168989	10207.8	4748.53	1.10406	1.21e-15	9.96e-15	10437.8	5008.99	1.05911	6.21e-15	4.07e-14	9531.44	3093.63	1.62308	1.28e-41	5e-40	9782.84	3252.85	1.58811	3.01e-45	9.21e-44	8684.39	8765.84	-0.0135491
Aco001877	347.095	336.732	361.059	440.517	479.825	420.84	233.911	292.462	205.756	285.937	271.148	269.93	340.914	361.315	361.048	297.384	301.798	284.164	270.253	215.014	211.623	10080.7	7874.93	0.356074	0.000480176	0.00384253	4947	6917.5	-0.483791	0.00287856	0.00661969	5876.28	7295.81	-0.312194	0.000280318	0.000701832	4619.17	8284.87	-0.842871	4.32e-08	2.09e-07	5508.46	8711.08	-0.661011	4.4e-12	2.68e-11	4890.26	4247.1	0.203551
Aco005166	394.952	423.819	435.327	453.812	514.658	471.215	331.296	384.629	330.194	384.179	397.72	360.595	447.835	401.42	425.471	319.717	366.853	338.617	399.51	321.506	349.129	8696.59	7594.6	0.195343	0.0597546	0.176501	5682.29	6672.77	-0.231844	0.0544805	0.0951005	6524.43	7037.71	-0.109198	0.261691	0.360252	5305.7	7146.88	-0.429705	0.000426094	0.00118541	6115.75	7514.76	-0.296994	0.00245105	0.00570959	5429	4878.64	0.154287
Aco014647	607.303	804.113	924.298	921.934	702.18	752.943	1.35897	3.19441	3.01814	0.968784	0.643075	0.308514	266.325	163.923	160.336	8.36208	44.6795	40.9805	0.142458	0.365097	2.59651	20120.9	19815.7	0.0220498	0.90594	0.957699	57.6505	17416.7	-8.23302	4.02e-173	2.57e-170	15.3457	18373.8	-10.2053	1.32e-240	9.23e-238	53.8232	16536.3	-8.25443	9.56e-279	2.55e-275	14.3988	17385.4	-10.2148	0	0	12.7892	49.4674	-1.94533
Aco004253	38.3151	39.556	40.4261	40.5623	33.6209	46.3399	54.409	46.4043	59.7423	44.3633	41.2232	41.4008	37.9906	37.806	39.291	44.8482	44.8375	49.12	34.299	37.5883	47.5471	6721.48	6616.91	0.0228411	0.873784	0.940635	8058.76	5813.28	0.471254	0.000697026	0.00177149	6696.95	6131.06	0.127385	0.142216	0.213803	7524.79	5522.24	0.446254	0.00524934	0.0118871	6277.89	5806.54	0.112333	0.384725	0.498076	5573.44	6920.73	-0.312405
Aco002446	305.606	407.493	327.512	419.967	431.47	412.431	469.547	534.368	412.246	248.109	224.331	330.108	98.3082	103.858	105.17	265.621	286.733	252.938	164.381	120.17	124.414	10692.5	8824.57	0.277043	0.0447242	0.142618	10772.8	7757.89	0.473688	0.00615815	0.0132773	6422.1	8180.61	-0.349215	0.0646117	0.107123	10059	8787.14	0.195006	0.129736	0.202119	6018.69	9239.21	-0.618447	2.48e-05	7.8e-05	5343.14	9249.54	-0.791786
Aco028861	833.604	830.031	543.67	1182.12	1116.47	1071.7	714.696	683.988	829.377	617.668	698.717	688.254	1212.99	1071.5	1219.54	1337.57	1409.31	1707.1	1384.95	1261.77	1333.33	7625.14	5010.5	0.605918	0.0012107	0.00827501	4535.53	4402.23	0.0431968	0.835198	0.883048	4289.55	4640.48	-0.11335	0.54537	0.649168	4234.95	6266.65	-0.565166	7.19e-06	2.61e-05	4020.19	6588.83	-0.712768	8.05e-13	5.2e-12	3568.42	3894.64	-0.126404
Aco005655	233.392	245.827	249.794	267.892	252.625	266.732	161.68	185.791	170.536	191.318	168.311	187.303	250.145	262.429	260.136	216.483	243.714	233.706	195.304	190.088	172.339	8363.2	7765.84	0.106982	0.215682	0.425258	4949.59	6822.98	-0.463062	2.54e-05	7.99e-05	5493.56	7195.97	-0.389504	9.7e-05	0.000257738	4621.55	6872.53	-0.572483	1.78e-07	7.96e-07	5149.79	7226.08	-0.488823	2.26e-07	8.9e-07	4572.09	4249.59	0.105452
Aco007624	179.731	204.844	223.928	268.277	300.447	260.216	367.732	411.807	370.162	394.998	420.48	371.709	167.67	170.992	172.839	232.015	224.541	239.227	303.334	252.868	251.909	7318.06	5384.35	0.442503	0.000637761	0.00484585	9127.25	4731.25	0.947908	1.53e-12	9.97e-12	9908.39	4990.56	0.98943	2.09e-15	1.41e-14	8522.37	6014.39	0.50299	2.2e-05	7.47e-05	9287.57	6323.83	0.554755	9.69e-08	3.98e-07	8244.44	7836.63	0.0732435
Aco006413	147.367	149.43	145.762	168.51	171.507	174.892	125.155	136.729	116.886	175.187	149.005	146.101	119.444	127.835	126.26	94.6993	100.411	88.4317	150.925	138.286	145.272	8772.89	7561.48	0.214433	0.00751961	0.036522	5803.63	6642.99	-0.194928	0.0768523	0.1293	7573.58	7005.66	0.112538	0.304656	0.408915	5419.07	7209.17	-0.411867	0.000191423	0.000563374	7100.62	7580.19	-0.0942275	0.364041	0.476107	6304.42	4983.14	0.33942
Aco006906	118.82	102.874	102.376	104.001	111.575	115.505	245.595	252.669	266.307	285.044	280.325	269.599	129.373	141.376	131.943	182.471	160.837	167.181	201.6	195.428	236.527	4425.11	4345.04	0.0263862	0.823929	0.914528	9192.29	3815.89	1.26845	4.36e-26	6.7e-25	10550.9	4023.96	1.3907	1.37e-39	2.95e-38	8583.1	3636.19	1.23908	1.46e-30	3.62e-29	9890.3	3823.43	1.37113	4.02e-53	1.59e-51	8780.07	7892.99	0.153624
Aco008258	101.016	117.264	135.273	130.522	132.59	138.711	172.371	162.344	189.797	153.391	139.27	144.515	105.5	100.669	90.3582	101.595	94.0196	114.317	241.166	200.317	215.006	6698.5	5907.6	0.181217	0.183601	0.382944	7866.72	5191.09	0.599709	0.000120769	0.000344662	6890.05	5476.03	0.331321	0.0166447	0.0315363	7345.42	5504.38	0.416298	0.000269113	0.000773847	6458.95	5787.71	0.158253	0.0739553	0.124713	5734.28	6755.27	-0.236471
Aco002467	31.9568	30.7064	35.9275	59.2498	63.9501	51.1647	212.857	233.385	668.077	304.324	248.942	215.95	61.3963	98.274	108.616	302.689	294.422	435.995	344.915	241.027	591.863	1906.44	1080.76	0.817877	1.17e-08	3.82e-07	10973.4	949.314	3.53098	6.69e-19	6.86e-18	7946.31	1001.33	2.98812	3.79e-80	2.45e-78	10244.9	1566.97	2.7089	3.91e-06	1.48e-05	7451.12	1647.53	2.17776	5.22e-48	1.72e-46	6616.01	9420.57	-0.50987
Aco007366	152.649	119.801	143.364	102.289	93.9224	121.309	169.77	170.831	174.585	199.796	170.243	179.753	192.583	217.167	262.896	173.212	220.556	218.819	210.235	192.151	234.933	4126.5	5421.97	-0.393718	0.011837	0.0519053	6023.56	4760.47	0.339434	0.0115545	0.0236019	6755.28	5020.87	0.427992	0.0014863	0.00336168	5624.41	3390.29	0.729959	2.42e-08	1.2e-07	6333.06	3564.91	0.82867	4.29e-11	2.4e-10	5622.85	5172.29	0.120486
Aco001625	104.347	140.227	131.442	175.493	149.524	164.551	224.969	294.95	246.416	472.872	495.332	401.887	194.521	224.109	241.953	445.866	472.306	398.431	200.519	227.257	270.189	4266.28	3284.53	0.377444	0.0114686	0.0507433	6006.21	2887.31	1.05679	2.51e-09	1.23e-08	11288.9	3045.21	1.89039	4.48e-34	7.64e-33	5608.04	3505.9	0.677622	1.83e-06	7.25e-06	10582.4	3686.15	1.52138	1.26e-38	3.11e-37	9394.05	5156.14	0.865479
Aco022555	29.9735	32.3419	33.5945	31.0863	34.8048	35.6842	28.6337	22.2694	27.6363	20.5057	16.932	22.9206	28.877	28.838	28.0736	26.5602	25.6869	32.9616	33.7284	28.3249	26.5006	8137.95	7703.64	0.0791089	0.467252	0.680174	5661.3	6768.62	-0.257733	0.0795846	0.133274	4572.38	7138.93	-0.64291	7.6e-06	2.31e-05	5286.31	6687.03	-0.339104	0.0159594	0.0323685	4285.94	7031.46	-0.714371	7.44e-08	3.11e-07	3805.25	4862.33	-0.353781
Aco009810	122.609	72.8532	82.0369	134.44	206.688	138.061	218.791	155.121	106.385	115.015	108.699	159.587	291.851	278.276	390.285	268.908	418.803	281.451	501.102	338.093	299.039	4932.87	2866.69	0.782867	0.0018079	0.0114565	4443.94	2515.36	0.820945	0.00607609	0.0131237	3730.92	2652.3	0.49213	0.0365931	0.064613	4149.95	4054.6	0.0335371	0.894759	0.926826	3496.38	4263.41	-0.286052	0.149241	0.228333	3103.83	3817.66	-0.298572
Aco009075	237.36	248.26	198.512	204.254	232.303	221.48	218.373	234.838	250.493	226.822	254.72	217.207	393.228	364.566	346.105	172.776	227.927	235.53	189.199	183.355	255.634	6106.92	6367.3	-0.0601919	0.64975	0.810615	5874.26	5594.64	0.0705305	0.621975	0.719689	6131.19	5898.8	0.0558997	0.677736	0.760017	5484.91	5018.46	0.128405	0.277932	0.377702	5746.78	5276.86	0.123255	0.252472	0.354998	5101.09	5043.73	0.0162816
Aco006991	36.5332	39.9607	43.7676	44.441	51.868	47.4971	53.3844	48.7111	61.8483	51.4128	48.7631	53.5729	48.6874	51.6454	60.5057	59.3639	63.8875	62.9675	62.1936	57.0797	61.0731	6242.15	5232.6	0.254334	0.0384349	0.127687	6402.22	4597.52	0.477755	0.0014034	0.00340336	6309.64	4849.41	0.379627	0.000839275	0.00197191	5977.94	5129.74	0.22095	0.109717	0.175728	5914.28	5393.86	0.132994	0.195303	0.286788	5250.46	5497.77	-0.0665616
Aco021391	30.3369	14.2716	14.7479	58.6034	29.0162	17.9578	307.864	228.562	528.142	236.457	304.003	248.667	36.1077	57.5086	127.051	843.183	834.566	1085.55	880.086	987.595	993.605	651.243	368.018	0.823247	0.0626064	0.182238	5915.66	322.732	4.19612	7.35e-29	1.31e-27	4605.71	340.222	3.75876	5.64e-40	1.24e-38	5523.4	535.597	3.36645	4.96e-08	2.38e-07	4316.34	562.899	2.939	7.51e-09	3.47e-08	3830.9	5080.21	-0.407247
Aco013480	21.1552	23.1265	22.841	21.5143	21.7913	24.9472	36.0622	26.211	37.7094	28.7098	22.7135	30.446	22.8755	22.6375	23.4578	34.5641	30.5945	39.9433	55.046	45.9729	44.9037	5125.25	5053.92	0.0204319	0.853821	0.930949	6756.87	4440.71	0.605606	0.000583541	0.00150062	5812.92	4683.4	0.311625	0.0287662	0.0519571	6309.27	4211.18	0.583196	0.000396514	0.00111022	5449.12	4428.08	0.299108	0.0265606	0.0500794	4838.16	5803.47	-0.262558
Aco027863	279.677	333.912	267.644	399.559	443.189	429.218	651.934	785.047	633.968	838.432	941.361	804.855	79.1987	77.0067	86.6118	100.02	153.489	128.979	120.714	87.1461	79.2477	8367.24	5811.87	0.525841	3.97e-05	0.000469064	12249.4	5108.13	1.26193	6.34e-16	5.34e-15	16075.7	5386.19	1.57769	3.97e-32	6.32e-31	11437.6	6875.89	0.734188	9.07e-09	4.72e-08	15067.8	7229.89	1.05951	3.63e-25	4.97e-24	13374.8	10516.7	0.346884
Aco006518	119.235	129.446	123.707	123.021	134.01	117.796	201.084	206.21	203.88	218.659	211.624	217.885	114.635	118.632	130.194	232.718	219.239	250.9	254.603	209.405	210.236	4833.16	4814.12	0.00547803	0.95797	0.982468	7087.87	4230.01	0.744778	1.07e-14	8.28e-14	7901.61	4460.99	0.824845	3.14e-21	2.95e-20	6618.19	3972.16	0.736774	1.63e-11	1.11e-10	7406.65	4176.5	0.826845	1.91e-18	1.79e-17	6575.26	6086.1	0.111503
Aco005715	104.986	118.29	114.569	141.991	154.295	151.885	256.179	288.407	283.567	259.95	266.906	255.191	133.712	155.321	157.258	243.199	222.284	235.401	296.831	268.367	287.446	4964.43	3751.82	0.404022	7.65e-05	0.000815579	8250.85	3296.84	1.32356	6.96e-30	1.32e-28	8190.59	3476.99	1.23621	1.27e-37	2.53e-36	7703.97	4079.56	0.917296	1.42e-16	1.46e-15	7677.34	4289.58	0.839885	6.21e-22	7.21e-21	6815.25	7084.05	-0.0558543
Aco018529	118.122	182.006	158.19	99.4726	152.314	141.246	59.3981	57.7933	99.7925	68.1484	59.568	63.7635	144.637	139.253	137.186	161.812	205.062	190.805	167.148	115.583	116.957	6863.36	8017.27	-0.224216	0.300774	0.525036	3409.75	7049.9	-1.04777	8.69e-05	0.000253868	3160.13	7435.2	-1.23435	2.61e-12	1.43e-11	3183.62	5639.46	-0.824655	0.000453253	0.00125539	2962.49	5930.44	-1.00126	4.58e-10	2.36e-09	2630.19	2927.72	-0.154896
Aco002647	3.37165	0.667496	1.87911	6.27374	1.39475	1.00188	57.4862	38.3895	36.403	61.4134	63.8536	63.8588	37.3802	116.368	121.14	285.431	274.649	331.281	532.306	364.409	337.65	149.441	102.659	0.541196	0.459477	0.674094	2052.99	89.9001	4.51149	4.65e-23	6.07e-22	3085.76	94.8115	5.02344	1.35e-16	9.9e-16	1917.13	122.936	3.96292	1.15e-06	4.67e-06	2892.26	129.165	4.48487	1.37e-08	6.17e-08	2567.45	1763.66	0.542192
Aco007378	298.962	327.588	302.832	376.019	416.954	366.657	250.299	290.761	216.261	274.483	268.679	262.112	206.112	227.958	228.603	223.837	237.024	216.213	227.873	192.83	197.655	9758.17	7840.89	0.315513	0.00279239	0.0163436	5729.45	6889.76	-0.266107	0.0752262	0.12687	6406.07	7265.72	-0.181556	0.0448077	0.0775115	5349.82	8019.72	-0.584077	4.23e-05	0.000138365	6004.93	8432.35	-0.489586	2.45e-07	9.64e-07	5330.86	4919.2	0.116074
Aco007060	2.35254	8.60873	1.54444	51.9884	52.6278	21.7918	1489.83	1498.93	984.041	1443.79	1818.72	1740.87	10.8051	17.2864	21.9854	373.748	257.075	193.516	626.754	587.796	454.5	582.113	57.646	3.34031	5.29e-09	1.86e-07	16443.7	50.8353	8.34017	5.15e-26	7.87e-25	21788.8	53.5451	8.67133	4.95e-29	6.8e-28	15354.7	478.736	5.00396	1.14e-30	2.83e-29	20418.3	503.249	5.34337	4.59e-49	1.57e-47	18122.1	14120.6	0.359992
Aco009491	289.294	305.12	316.479	347.882	333.79	341.356	283.159	357.377	304.906	381.567	380.571	335.533	278.249	272.913	297.288	274.446	321.562	294.364	293.971	269.957	289.948	7372.94	6582.51	0.163597	0.0618751	0.180998	6127.79	5783.29	0.083481	0.535099	0.647822	7479.09	6099.61	0.294212	0.00447259	0.00935629	5721.6	6058.93	-0.0826382	0.511003	0.60986	7011.07	6370.6	0.138289	0.141419	0.218036	6224.03	5260.71	0.24263
Aco015178	128.053	122.137	122.944	109.742	124.888	113.402	107.772	90.0194	78.8827	71.3027	75.3265	88.3393	111.362	107.915	110.71	66.9483	63.2469	62.8744	85.084	92.1965	78.0387	8032.72	8636.28	-0.104661	0.304159	0.528829	5742.61	7586.14	-0.401797	0.00814061	0.017144	5129	8000.34	-0.641548	1.23e-07	4.49e-07	5362.37	6601.36	-0.29997	0.0415594	0.0756989	4806.74	6941.15	-0.53017	7.73e-06	2.58e-05	4266.77	4932.14	-0.209019
Aco008034	344.92	331.318	339.072	332.837	370.41	330.701	252.412	296.05	281.997	387.377	359.967	349.073	231.698	240.083	255.046	242.761	264.776	261.029	240.389	202.759	218.116	7920.68	7799.55	0.0220574	0.824283	0.914731	5721.36	6851.23	-0.259941	0.0210854	0.0407057	7939.41	7225.47	0.135982	0.12559	0.191969	5342.11	6509.47	-0.28495	0.0183065	0.0365615	7442.79	6844.44	0.121133	0.218184	0.31453	6607.66	4912.09	0.42776
Aco013642	86.9602	136.407	119.347	198.448	159.164	182.372	87.9708	91.3323	127.588	140.139	116.63	123.907	159.314	163.485	191.249	208.778	195.935	213.522	122.18	117.068	144.614	8093.66	5148.03	0.652864	0.000482536	0.00385692	4140.21	4526.99	-0.128698	0.577118	0.680434	5394.54	4774.49	0.176221	0.339716	0.447323	3865.7	6651.07	-0.782714	6.84e-06	2.49e-05	5057.51	6992.94	-0.467567	0.00011606	0.000332672	4490.44	3554.83	0.336846
Aco001573	144.967	154.358	163.295	177.116	180.183	180.672	231.67	230.244	239.721	289.051	275.469	271.459	176.662	192.036	202.776	239.265	238.936	262.117	358.208	337.555	354.625	5172.11	4459.3	0.213846	0.0233912	0.0877981	6067.95	3917.92	0.631109	1.52e-09	7.62e-09	7598.58	4132.33	0.878739	5.26e-20	4.61e-19	5665.86	4250.28	0.414796	2.61e-05	8.79e-05	7122.97	4469	0.672589	4.03e-16	3.31e-15	6323.55	5210.46	0.27931
Aco005563	21.131	17.5324	9.96052	52.9744	42.7707	32.8791	346.884	328.89	334.069	329.098	316.431	315.539	20.8376	20.1095	17.5684	304.844	178.046	275.897	864.948	669.649	595.433	1244.94	472.494	1.39815	2.64e-06	4.48e-05	8792.78	414.949	4.4061	2e-63	1.32e-61	8795.46	437.315	4.33087	1.63e-70	8.57e-69	8210.23	1023.45	3.00452	8.46e-66	7.39e-64	8244.76	1075.92	2.93855	1.25e-74	8.62e-73	7319.37	7550.62	-0.0448366
Aco001782	65.6735	77.2056	85.3452	58.8224	58.3613	64.5186	167.659	152.554	195.91	141.968	134.482	137.418	82.195	83.5102	92.9301	162.411	132.969	156.309	174.797	163.535	170.05	3381.62	4257.6	-0.332253	0.0137933	0.0584329	8643.32	3741.38	1.20802	3.06e-13	2.1e-12	7282.72	3946.55	0.883814	7.6e-12	4.04e-11	8070.52	2778.66	1.5382	7.79e-30	1.86e-28	6826.75	2921.71	1.22407	3.4e-41	9.11e-40	6060.59	7422.28	-0.292494
Aco008411	7.48378	10.6351	12.0254	14.8507	10.916	17.4958	129.521	125.656	150.892	42.3037	51.4415	56.9874	14.761	15.5922	16.6113	78.0694	63.1009	76.4381	183.99	144.193	131.736	1577.18	1101.46	0.518328	0.0288542	0.103192	13323.8	968.241	3.78238	6.3e-77	5.76e-75	5200.53	1021.46	2.34783	3.91e-30	5.69e-29	12440.8	1295.66	3.26244	4.14e-74	4.32e-72	4873.16	1362.37	1.83776	1.04e-24	1.39e-23	4325.23	11441	-1.40352
Aco025290	151.453	194.039	187.575	250.646	281.654	256.246	238.718	298.838	245.046	231.708	223.414	224.367	138.513	140.566	155.186	102.703	101.898	99.3613	142.612	119.105	132.383	9542.1	6464.74	0.561665	3.05e-05	0.00037144	8515.06	5682.27	0.583563	0.000344988	0.000920566	7773.28	5993.12	0.375246	0.00364724	0.00775451	7950.66	7841.82	0.0199499	0.880371	0.916019	7286.52	8245.42	-0.178211	0.0525114	0.0921559	6468.66	7310.25	-0.176445
Aco009958	198.677	242.977	256.547	220.332	236.785	208.673	315.325	404.67	407.796	352.536	379.953	304.999	277.356	284.999	278.708	342.313	311.638	373.228	425.036	360.768	441.887	4707.27	4947.36	-0.07196	0.598672	0.77872	7171.53	4347.95	0.721994	2.58e-05	8.08e-05	6934.23	4586.21	0.596478	5.94e-05	0.000161949	6696.02	3868.7	0.791693	2.78e-08	1.37e-07	6500.06	4067.71	0.676564	7.07e-09	3.27e-08	5770	6156.59	-0.0935829
Aco005342	109.593	101.771	118.296	199.244	158.006	182.805	554.772	660.918	366.598	339.112	401.943	491.236	129.626	126.981	145.974	625.221	383.68	344.204	250.377	311.98	185.725	4291.64	2627.62	0.707799	1.51e-07	3.66e-06	11304.5	2307.88	2.29215	2.55e-24	3.56e-23	9267.08	2434.28	1.92843	1.25e-31	1.93e-30	10555.7	3526.7	1.58149	9.83e-15	8.78e-14	8683.38	3707.97	1.2274	1.06e-15	8.51e-15	7707.15	9705.82	-0.332643
Aco023412	252.062	347.372	296.756	482.734	582.653	484.142	754.225	857.772	660.309	852.259	934.235	763.036	321.713	400.766	344.262	380.989	444.381	463.796	599.379	414.652	532.397	6657.3	3858.34	0.786925	8.94e-07	1.77e-05	8776.78	3392.07	1.37158	8.8e-15	6.87e-14	10354.3	3577.22	1.53347	1.23e-22	1.26e-21	8195.23	5471.38	0.582981	6.58e-05	0.000209173	9705.71	5752.98	0.754786	1.29e-09	6.34e-09	8615.44	7535.72	0.193291
Aco010776	121.268	158.647	181.727	166.35	154.564	178.097	81.4403	93.0682	81.8908	68.1273	65.0375	79.8699	139.304	140.205	139.69	96.7032	96.6033	90.2193	92.3817	79.9006	70.6191	9436.96	8749.35	0.109164	0.516164	0.718835	4361.23	7689.94	-0.81827	6.56e-06	2.22e-05	3810.56	8112.46	-1.09026	9.08e-10	4.03e-09	4072.2	7754.24	-0.929298	4.4e-15	4.02e-14	3571.47	8153.33	-1.1912	1.08e-24	1.44e-23	3170.53	3744.47	-0.240216
Aco000426	57.3475	60.5738	78.1648	72.5795	55.1574	73.6866	201.491	209.576	318.58	215.543	197.736	191.633	73.2126	86.1138	83.5312	168.15	128.373	167.131	204.857	207.229	228.531	3127.11	3052.4	0.0350195	0.845984	0.926678	10197.8	2681.57	1.92708	4.16e-17	3.79e-16	8880.36	2829.02	1.65013	3.53e-28	4.7e-27	9521.56	2569.4	1.88962	6.06e-21	8.62e-20	8325.03	2701.55	1.62317	5.18e-35	1.1e-33	7391	8755.83	-0.244566
Aco010251	253.079	340.646	330.964	301.394	301.986	294.729	50.1174	48.3793	59.8266	45.9683	76.2299	66.2731	243.431	231.792	237.467	96.9529	159.035	172.874	82.2188	90.5061	119.655	10790.2	11133.9	-0.0452405	0.748465	0.872327	1711.45	9787.2	-2.51543	7.47e-47	2.84e-45	2142.72	10322.9	-2.26839	1.75e-26	2.16e-25	1598.01	8867.4	-2.47176	2.4e-84	3.18e-82	2007.45	9323.56	-2.21558	8.57e-40	2.18e-38	1781.29	1469.59	0.277232
Aco008511	154.489	209.978	204.123	72.3796	91.5375	114.268	64.7778	55.8281	57.7217	44.22	43.0126	48.2047	98.3998	96.7001	87.0508	73.7786	80.3964	81.3755	66.2508	65.21	65.7392	6489.44	13292.3	-1.03434	2.99e-07	6.82e-06	3742	11684.8	-1.64279	4.89e-23	6.38e-22	2987.61	12324.4	-2.04454	2.71e-41	6.18e-40	3494.14	5330.92	-0.609603	0.000534894	0.00146212	2800.27	5606.13	-1.00164	5.28e-10	2.7e-09	2485.91	3213.67	-0.370481
Aco002999	130.718	144.13	142.194	163.293	153.521	160.347	180.36	190.393	192.087	175.967	180.25	176.434	124.726	130.653	133.226	209.381	203.819	230.143	245.12	226.103	222.975	5926.41	5193.59	0.190524	0.0409807	0.133688	6288.41	4563.52	0.462629	9.28e-06	3.08e-05	6255.87	4812.94	0.378325	3.88e-05	0.00010838	5871.67	4870.14	0.2698	0.00790547	0.0172173	5863.79	5120.65	0.195416	0.0177769	0.034942	5205.33	5399.46	-0.0528828
Aco006558	58.1327	66.491	72.05	65.4807	71.4222	66.5439	97.8175	88.229	104.753	91.587	82.1491	95.4542	78.0109	82.9125	88.7514	113.534	107.222	114.703	101.322	90.6256	95.25	5118.43	4959.65	0.04529	0.709579	0.849277	6581.8	4358.11	0.594786	3.01e-05	9.38e-05	6403.08	4596.93	0.477991	0.000207608	0.000528647	6145.69	4206.35	0.547186	5.91e-06	2.17e-05	6002.04	4422.83	0.440559	1.7e-05	5.45e-05	5328.6	5652.12	-0.0851647
Aco022481	106.891	131.96	116.621	146.633	189.973	176.592	118.174	115.117	120.388	107.234	104.731	101.292	94.0424	100.686	97.1036	114.629	111.981	111.687	155.144	128.738	124.342	9095.5	6314.52	0.526477	0.000372494	0.00308998	5637.61	5550.06	0.0226773	0.85975	0.901721	5248.08	5852.94	-0.157249	0.18159	0.26341	5264.05	7474.11	-0.505642	0.000145707	0.000438089	4919.5	7859.28	-0.675768	1.62e-08	7.24e-08	4367.29	4841.02	-0.148555
Aco011503	35.1583	40.0552	43.4809	40.8886	44.7711	43.6845	42.9138	34.7031	45.3529	34.2877	30.3922	36.7721	39.3067	38.6621	41.2365	50.0603	46.3466	53.577	57.4379	53.9886	48.2281	6509.83	5987.99	0.120451	0.316658	0.542197	5568.6	5261.69	0.0818097	0.614648	0.714226	4827.79	5550.01	-0.201258	0.134928	0.204181	5199.67	5349.53	-0.0408974	0.769263	0.831693	4525.35	5624.93	-0.313891	0.00386374	0.00867393	4017.61	4782.47	-0.251559
Aco023126	312.766	413.794	329.529	741.222	731.761	609.925	455.927	540.214	355.821	270.16	262.335	300.306	349.629	350.866	342.533	267.234	288.286	227.02	270.312	199.698	166.379	12280.8	6241.46	0.97647	2.72e-10	1.3e-08	7165.86	5486.95	0.385135	0.0569136	0.0989265	4643.17	5785.85	-0.317393	0.031254	0.0560021	6691.1	10094	-0.593217	0.000525764	0.00143853	4351.96	10612.7	-1.28606	4.92e-28	7.74e-27	3863.39	6152.41	-0.671255
Aco001824	19.0059	13.8902	5.65449	5.55257	10.8609	9.42503	831.429	1343.2	1867.07	746.233	1190.64	592.027	23.769	8.01798	13.6075	247.252	30.8702	185.195	674.277	159.247	1042.45	145.624	218.148	-0.583002	0.201812	0.408137	20488.9	191.517	6.74215	3.17e-59	1.81e-57	13471.8	201.779	6.06156	4.62e-30	6.7e-29	19129	119.653	7.32258	1.63e-143	7.91e-141	12625.5	125.834	6.64964	4.81e-61	2.35e-59	11203.4	17585.6	-0.650469
Aco012373	58.1531	80.5177	62.4582	152.73	164.843	126.531	204.719	217.683	322.535	135.352	155.101	142.215	60.6581	61.5447	62.2923	287.299	293.871	308.99	160.519	173.953	212.479	6015.09	2730.17	1.13962	5.57e-11	3.08e-09	9078.98	2400.39	1.91944	5.99e-17	5.38e-16	5541.15	2531.12	1.13065	7.25e-13	4.16e-12	8476.91	4944.22	0.778004	6.42e-05	0.000204541	5193.36	5198.33	-0.00109449	0.993156	0.995042	4609.73	7795.08	-0.75799
Aco005296	206.684	320.047	151.919	241.917	100.428	177.39	407.057	452.931	414.754	708.754	601.717	509.617	155.389	183.701	113.997	290.656	169.357	208.308	351.236	667.021	725.921	3385.58	4435.01	-0.389327	0.25025	0.467354	7473.59	3901.34	0.93797	0.00041377	0.00109034	11212	4111.83	1.44735	2.79e-08	1.09e-07	6978.3	2782.11	1.32646	1.37e-07	6.21e-07	10512.9	2924.68	1.84571	4.06e-07	1.56e-06	9334.34	6416.83	0.54075
Aco014164	13.9609	6.18806	7.34249	10.1347	11.0948	7.81399	40.7002	33.8879	38.4228	29.0513	28.3586	26.6404	8.06731	8.72702	10.0562	115.537	72.6313	88.9756	257.053	193.54	155.645	1154.45	1097.66	0.0724136	0.81463	0.909699	4040.57	962.48	2.06964	4.33e-12	2.72e-11	3157.97	1014.75	1.63778	4.13e-09	1.74e-08	3772.92	948.995	1.99228	3.75e-33	1.03e-31	2960.31	997.751	1.57044	7.86e-27	1.17e-25	2628.03	3470.16	-0.400885
Aco000115	358.274	418.87	428.271	417.447	380.789	405.691	436.543	540.847	390.455	375.35	359.432	358.384	380.419	352.282	371.291	372.104	355.3	351.649	424.298	319.095	320.63	6710.48	6735.79	-0.00537526	0.962449	0.984711	6855.51	5919.26	0.211798	0.207492	0.304069	5761.29	6243.23	-0.115892	0.300817	0.404624	6401.2	5514.45	0.215023	0.140675	0.216207	5400.6	5798.06	-0.102545	0.238713	0.338877	4794.45	5885.64	-0.295749
Aco012256	84.9566	87.8474	78.5842	123.442	129.162	125.922	108.266	105.567	102.998	114.18	106.722	111.475	81.8486	84.1226	83.3351	166.957	152.794	149.55	289.414	296.288	257.611	6022.46	4011.02	0.586481	1.85e-09	7.36e-08	4534	3524.06	0.363644	0.000660031	0.00168341	4999.69	3716.11	0.428191	1.09e-05	3.25e-05	4233.61	4949.15	-0.225289	0.0250942	0.0484112	4686.67	5203.84	-0.150948	0.0787192	0.131694	4160.72	3893.4	0.0958549
Aco007532	216.569	207.069	207.831	201.962	194.618	197.849	207.969	204.82	189.888	267.345	280.182	255.383	219.182	235.366	259.674	273.527	288.141	306.971	339.584	246.976	278.513	5254.7	5598.67	-0.0914403	0.286242	0.509066	4791.94	4917.92	-0.0375505	0.707523	0.789216	6711.19	5186.43	0.371893	3.39e-05	9.57e-05	4474.47	4318.22	0.051156	0.622782	0.710008	6290.69	4540.34	0.470467	6.28e-08	2.65e-07	5584.22	4114.87	0.440683
Aco004241	149.33	155.867	126.059	144.17	133.416	141.455	589.96	692.534	795.63	651.92	677.318	590.351	131.579	143.552	126.89	314.843	258.998	329.232	386.821	484.257	518.368	2651.69	2737.28	-0.0454397	0.721974	0.856999	11831.6	2405.09	2.29869	3.13e-42	9.99e-41	11485.4	2535.88	2.17953	1.67e-65	7.53e-64	11047.1	2179.07	2.34187	6.84e-62	5.4e-60	10766.2	2291.15	2.23221	5.42e-117	9.17e-115	9557.21	10157.9	-0.0879907
Aco002145	41.0273	60.3783	46.6839	148.804	121.953	120.992	209.471	211.345	191.555	196.219	175.694	197.232	58.7332	64.6133	62.7612	168.711	120.037	129.268	192.134	191.455	162.473	6416.73	2431.39	1.40025	3.79e-15	4.31e-13	9022.55	2137.98	2.07749	1.17e-31	2.4e-30	8815.42	2254.47	1.96747	3.28e-32	5.25e-31	8424.78	5273.76	0.675767	1.88e-07	8.39e-07	8263.52	5544.61	0.575633	1.01e-06	3.71e-06	7336.39	7747.57	-0.0786544
Aco008126	105.671	104.988	105.646	83.9999	93.4637	105.438	221.072	224.882	234.716	269.375	245.519	232.386	110.32	108.818	120.741	149.388	127.901	149.77	216.76	211.347	261.471	3756.98	4212.45	-0.164905	0.179709	0.377935	8131.28	3700.56	1.1358	1.07e-34	2.52e-33	9380.92	3902.69	1.26532	1.97e-38	4.03e-37	7592.43	3086.83	1.29829	5.26e-25	9.61e-24	8794.51	3245.92	1.43782	5.43e-34	1.11e-32	7807.88	6982.04	0.161292
Aco004224	81.1858	57.6732	84.3413	33.1473	22.4088	41.4786	458.625	390.307	589.338	386.773	311.916	340.202	71.8013	87.8468	72.5965	134.322	105.865	204.842	189.486	166.84	270.49	1140.48	2632.78	-1.20624	1.45e-06	2.7e-05	15220.4	2311.03	2.71927	5.94e-35	1.41e-33	11546.8	2437.9	2.24353	1.37e-37	2.73e-36	14211.6	936.802	3.92218	4.7e-68	4.35e-66	10825.6	985.055	3.45669	9.37e-73	6.15e-71	9612.04	13070.6	-0.443461
Aco020601	77.9436	119.931	59.4722	395.907	280.104	189.041	569.835	592.9	414.488	582.591	643.87	572.518	113.081	116.619	101.231	336.554	265.011	260.437	606.734	564.879	473.146	5621.14	1676.67	1.74544	2.17e-08	6.71e-07	9216.3	1474.86	2.6439	1.16e-21	1.41e-20	11055.4	1554.5	2.83065	2.58e-32	4.13e-31	8605.87	4621.88	0.896889	0.000229091	0.000666497	10362.2	4858.36	1.09291	2.77e-07	1.08e-06	9198.06	7913.94	0.217051
Aco010729	42.9891	109.534	41.3902	48.9616	40.3876	43.2542	176.817	216.973	271.73	29.7107	59.4659	30.3234	51.7293	14.5831	24.3528	112.713	138.057	92.2555	98.7983	98.0019	91.1172	3431.83	5027.54	-0.550757	0.105975	0.262631	15499.7	4428.09	1.80759	1.18e-06	4.33e-06	2926.33	4666.56	-0.673213	0.237535	0.331802	14471.8	2820.31	2.3593	2.83e-42	1.13e-40	2741.76	2965.24	-0.112954	0.630709	0.71737	2432.43	13306.4	-2.45162
Aco022451	222.166	218.869	260.396	228.792	221.333	229.528	253.897	314.238	317.82	248.528	252.006	213.7	265.066	227.143	253.408	197.401	160.226	182.36	241.802	206.377	239.614	6159.57	6374.06	-0.0494603	0.659457	0.817289	7222.51	5599.09	0.367317	0.0148698	0.029656	6119.56	5906.12	0.0512162	0.687279	0.768508	6743.66	5061.71	0.413979	0.00130225	0.00332181	5736.65	5322.13	0.108299	0.284677	0.391124	5092.6	6200.56	-0.28401
Aco009024	170.053	207.711	172.686	253.332	161.923	312.456	116.938	112.709	153.596	160.512	163.741	171.156	187.347	199.651	164.237	150.539	150.443	160.716	119.112	137.823	126.567	8948.55	6789.47	0.398512	0.087209	0.22896	4242.83	5967.56	-0.491917	0.00607206	0.0131175	5763.65	6292.73	-0.126635	0.30073	0.404531	3961.58	7350.39	-0.891794	8.03e-05	0.000251643	5402.19	7728.93	-0.516925	0.00811178	0.0171524	4795.56	3643.2	0.396229
Aco012014	231.888	356.79	329.973	538.172	555.476	393.13	60.1356	75.7832	87.9576	44.0205	52.2206	47.0491	262.67	280.526	299.255	174.731	287.335	222.033	64.139	61.8406	66.6326	14130.2	8746.74	0.691926	0.000804441	0.00590554	1913.93	7691	-2.00639	2.33e-19	2.47e-18	1287.75	8111.97	-2.65516	1.38e-46	3.67e-45	1787.01	11615.8	-2.70007	2.85e-47	1.39e-45	1206.88	12212.3	-3.33882	6.36e-109	9.15e-107	1071.22	1643.07	-0.617566
Aco013943	86.7571	51.3042	61.1244	53.9288	32.0906	53.1631	140.42	139.042	488.613	121.095	124.065	104.122	122.166	148.638	210.467	197.48	170.952	229.614	176.805	131.057	260.042	2029.91	2917.8	-0.523159	0.045809	0.145233	10098.1	2560.19	1.97977	0.00449394	0.00994619	4818.17	2699.73	0.835633	4.15e-05	0.000115364	9427.56	1667.75	2.49894	0.00031353	0.000892652	4516.66	1753.48	1.36441	2.49e-13	1.68e-12	4009.54	8669.38	-1.11251
Aco003000	91.2606	100.026	100.647	90.9572	103.005	94.8504	0.906653	1.32589	1.40607	0.984895	0.677804	1.2269	228.205	211.663	286.013	29.5026	98.5373	54.3622	10.9877	10.1635	7.02801	7789.15	7892.98	-0.0192249	0.853991	0.930949	88.263	6935.29	-6.28997	3.29e-257	6.32e-254	73.6894	7314.49	-6.64038	4.99e-271	5e-268	82.4084	6401.12	-6.27274	3.17e-284	1.35e-280	69.0724	6730.62	-6.61466	0	0	61.3316	75.7626	-0.310295
Aco006586	88.438	102.571	82.7435	96.8934	106.954	104.441	245.875	237.124	215.38	218.178	247.84	256.064	100.873	105.349	96.7087	241.742	198.3	167.415	283.98	278.578	227.123	3843.64	3422.08	0.167749	0.186635	0.387051	7830.7	3007.52	1.38071	2.84e-23	3.74e-22	8514.46	3171.21	1.42504	2.04e-26	2.5e-25	7311.96	3158.54	1.211	3.06e-26	6.06e-25	7979.5	3321.16	1.26465	6.86e-33	1.35e-31	7082.75	6724.45	0.0749245
Aco013721	186.817	170.637	199.97	132.99	162.234	176.826	235.722	306.873	258.663	268.913	271.209	261.059	158.28	165.207	170.556	200.162	200.974	216.391	243.551	219.993	246.583	4783.28	5663.97	-0.243821	0.0990396	0.249921	7300.67	4974.58	0.553403	0.000200538	0.000553524	7675.38	5247.03	0.548612	8.08e-08	3.01e-07	6816.69	3930.03	0.794495	4.1e-07	1.76e-06	7194.55	4132.67	0.79976	8.44e-11	4.61e-10	6386.77	6267.43	0.0271991
Aco012184	131.582	200.695	155.904	106.237	92.2307	164.98	36.9338	41.6611	30.6597	20.8877	17.5251	23.9041	177.865	149.28	139.976	58.1292	68.6691	59.327	20.8408	25.9544	23.8391	8635.13	11627.2	-0.429077	0.080608	0.216983	2334.71	10224.8	-2.13084	5.17e-25	7.55e-24	1400.52	10782.1	-2.94482	9.17e-52	2.85e-50	2180.03	7092.1	-1.70213	3.28e-15	3.04e-14	1312.75	7458.1	-2.50661	1.31e-34	2.74e-33	1165.5	2004.6	-0.782542
Aco018574	33.6166	32.6186	34.9042	34.0479	31.9354	35.2043	78.845	66.3002	118.558	76.2176	58.5457	65.5487	27.3467	30.0652	29.0727	98.0676	73.4392	81.0668	87.987	79.6808	93.3849	3648.12	3656.95	-0.00332076	0.972682	0.989002	8558.98	3212.34	1.41387	6.28e-10	3.26e-09	6826.4	3388.02	1.01064	4.79e-15	3.16e-14	7991.55	2997.74	1.41463	3.52e-12	2.54e-11	6400.34	3152	1.02172	4.04e-17	3.54e-16	5683.1	7349.89	-0.371136
Aco018977	49.8584	51.7076	62.1893	52.6464	53.3541	54.5674	190.547	211.973	291.89	224.859	199.454	200.919	79.443	83.6148	108.753	269.909	273.616	321.974	273.134	296.509	342.306	1970.17	2014.36	-0.0322681	0.803055	0.902184	7667.34	1769.62	2.11525	2.45e-25	3.64e-24	7252.13	1866.74	1.95762	3.98e-51	1.21e-49	7158.88	1618.99	2.14474	1.26e-35	3.83e-34	6798.73	1702.31	1.99775	1.07e-95	1.15e-93	6036.11	6582.87	-0.125226
Aco024340	81.8648	118.437	98.1562	204.746	198.755	198.803	607.402	651.869	573.644	525.576	489.519	470.013	81.4709	85.4647	92.4876	246.805	219.929	237.593	341.976	289.172	296.479	4664.75	2316.65	1.00995	9.4e-11	4.93e-09	12767.2	2036.93	2.64814	4.82e-54	2.33e-52	10873.6	2148.07	2.33994	8.5e-50	2.52e-48	11921.2	3833.46	1.63679	2.58e-54	1.66e-52	10193.5	4030.64	1.33863	1.23e-51	4.64e-50	9049.7	10962.3	-0.276549
Aco019053	40.9285	51.5292	46.2626	62.9494	60.8992	62.1761	149.666	132.527	146.496	124.083	116.145	128.274	52.2318	51.7223	54.6452	106.917	85.5155	91.3772	191.841	160.188	159.95	4094.02	3060.44	0.41994	0.000548082	0.00428285	8487.86	2690.03	1.65791	3.23e-32	6.83e-31	7668.66	2836.91	1.43477	4.28e-30	6.21e-29	7925.55	3364.37	1.23615	7.41e-30	1.78e-28	7188.23	3537.45	1.02281	8.08e-31	1.45e-29	6381.5	7289.18	-0.191908
Aco020877	46.3696	47.5987	52.7546	43.0519	47.7951	49.3279	58.5537	45.855	57.972	41.9553	37.3792	46.8146	52.8511	54.5367	56.9892	45.1365	47.9972	50.0477	49.3241	51.89	51.6989	5903.84	6195.66	-0.0696585	0.536205	0.734497	6153.38	5442.98	0.176962	0.238713	0.342276	5023.98	5741.07	-0.192667	0.134257	0.203258	5745.77	4851.22	0.244159	0.0845839	0.140843	4709.09	5101.09	-0.115518	0.331853	0.442817	4180.7	5284.9	-0.33825
Aco001732	220.51	74.7492	63.1792	41.9294	92.6587	53.9704	284.887	228.479	131.404	136.271	220.053	178.213	267.618	241.415	263.849	121.422	233.438	175.251	272.073	254.833	269.703	2178.02	4161.16	-0.934043	0.156162	0.345362	6690.62	3646.04	0.87579	0.173476	0.26156	5837.52	3842.25	0.603405	0.314077	0.419366	6247.93	1790.24	1.80334	0.000103291	0.000317367	5469.37	1882.6	1.53884	0.000148094	0.000416626	4853.28	5747.05	-0.243741
Aco005708	180.703	106.265	110.654	93.2922	125.211	104.906	175.22	178.714	144.161	210.736	198.261	158.66	206.201	184.873	201.49	191.034	195.902	215.759	184.687	148.881	191.702	4035.05	4980.05	-0.303677	0.19604	0.399803	5587.08	4369.59	0.354546	0.133961	0.209554	6692.15	4607.06	0.538652	0.0172439	0.0325884	5216.97	3316.06	0.653879	2.74e-05	9.2e-05	6274.27	3486.88	0.847847	1.68e-08	7.49e-08	5570.33	4797.58	0.215667
Aco000388	91.7449	98.9938	95.8575	133.561	146.64	128.879	92.4994	113.363	82.8653	105.75	106.165	96.8026	89.691	101.057	98.0621	76.9838	83.996	74.2004	75.773	70.8956	71.3784	8776.24	6164.37	0.509522	6.1e-07	1.27e-05	5568.78	5416.33	0.0399974	0.794929	0.85027	6261.03	5712.16	0.132493	0.160668	0.237511	5199.75	7212.76	-0.472105	0.00131668	0.00335182	5869.05	7583.84	-0.369549	0.000198354	0.000546775	5210.15	4781	0.124147
Aco011930	109.906	115.449	123.322	102.836	120.837	112.581	52.8233	51.0293	55.5747	36.9698	43.545	54.818	130.878	121.812	126.869	58.9136	77.1107	68.4474	50.5924	45.2955	46.3588	8292.46	8620.38	-0.0560742	0.618117	0.790441	3536.5	7573.59	-1.09859	7.35e-24	1e-22	3157.41	7988.09	-1.33935	1.21e-15	8.32e-15	3302.16	6814.52	-1.04504	1.11e-18	1.36e-17	2958.5	7165.44	-1.2764	6.02e-17	5.22e-16	2625.89	3036.8	-0.210054
Aco002837	42.0747	45.8515	62.3833	31.5058	42.7258	43.0764	37.9827	33.57	45.0791	33.3859	23.2114	31.524	60.6478	60.6183	71.7805	33.8209	42.8087	44.2371	39.2456	32.573	38.7998	5576.95	7160.77	-0.360715	0.0701485	0.197628	4988.56	6291.05	-0.334672	0.0992726	0.161477	3959.25	6637.56	-0.745525	0.000227025	0.000575541	4657.96	4582.28	0.0237425	0.890603	0.923783	3712.07	4818.63	-0.376441	0.0275111	0.0516781	3296.27	4283.91	-0.378262
Aco006145	50.6344	55.0138	57.5565	65.0218	72.0659	58.7986	94.1175	79.167	63.4337	77.5026	92.7771	96.9468	55.8319	53.7059	53.0745	84.3141	77.0428	79.4233	88.1242	87.118	66.9985	5764.94	4814.84	0.259548	0.0369681	0.124276	6264.22	4230.49	0.56618	0.00136258	0.00331204	7438.33	4461.99	0.737199	2.21e-08	8.71e-08	5849.49	4738.26	0.303957	0.0707452	0.12088	6970.49	4981.94	0.484715	0.000166912	0.000465547	6186.85	5380.19	0.201659
Aco010937	2968.19	2248.51	1734.17	493.97	343.918	459.78	47.3461	67.8336	75.8388	28.5221	65.556	68.9027	1223.97	1387.4	818.805	63.6699	99.2172	119.513	21.7281	46.6258	75.8626	4032.46	21689.2	-2.4271	8.38e-27	4.94e-24	534.166	19042.5	-5.15506	1.3e-90	1.67e-88	479.761	20073.8	-5.38738	7.76e-65	3.43e-63	498.733	3313.47	-2.73107	4.83e-40	1.76e-38	449.29	3483.75	-2.95525	6.25e-13	4.08e-12	398.586	458.521	-0.203262
Aco013228	60.4043	71.915	57.7421	102.33	98.124	87.8969	137.876	139.673	155.346	93.8968	133.495	127.574	125.775	124.571	110.955	106.586	108.072	99.8051	166.5	159.411	123.192	5345.93	3533.02	0.597621	9.34e-06	0.000135422	7220.05	3105.2	1.21757	1.4e-17	1.32e-16	6226.46	3274.23	0.927332	1.28e-07	4.67e-07	6741.54	4393.77	0.617831	3.8e-07	1.63e-06	5834.02	4619.59	0.336766	0.0229826	0.0439766	5177.41	6199.57	-0.260036
Aco001963	293.105	235.35	214.167	284.519	360.492	323.609	320.198	347.367	262.565	259.994	277.869	304.538	303.962	261.674	295.776	197.931	237.073	196.698	308.331	280.086	238.604	7319.18	5629.88	0.378542	0.0239946	0.0895412	6318.57	4943.47	0.354038	0.0514518	0.0904628	6019.26	5212.29	0.20764	0.176347	0.256905	5899.98	6014.73	-0.0277937	0.855165	0.89795	5641.25	6324.57	-0.164904	0.181139	0.269453	5007.53	5425.4	-0.115583
Aco009641	283.808	334.77	299.53	318.349	379.608	349.016	149.637	209.788	145.725	204.653	175.116	165.464	220.609	222.18	194.521	103.555	119.027	102.845	141.082	123.758	119.236	10231.9	8994.28	0.18597	0.131827	0.30772	4437.68	7904.6	-0.832899	6.27e-06	2.12e-05	5035.53	8335.91	-0.727057	2.19e-08	8.62e-08	4143.52	8408.36	-1.02097	1.04e-09	5.98e-09	4721.15	8841.37	-0.904951	7.4e-14	5.19e-13	4191.77	3809.39	0.138099
Aco023030	0.69973	0.434054	0.235812	0.397367	0.676383	0.418817	116.138	69.5526	167.101	85.7294	68.8568	65.0693	5.39306	8.57222	13.7717	279.141	213.061	345.89	493.102	635.056	724.257	19.8128	18.2556	0.114861	0.862192	0.934892	4214.61	16.0196	8.04595	1.73e-85	1.98e-83	2753.93	16.8805	7.36108	1.44e-149	3.76e-147	3935.28	16.2858	7.93533	1.64e-120	4.65e-118	2582.22	17.1248	7.26476	3.9e-187	2.01e-184	2292.82	3620.03	-0.658953
Aco008776	146.886	176.946	144.68	203.66	245.429	232.078	183.709	214.206	187.872	223.911	252.548	205.093	144.035	167.569	134.071	128.016	149.016	128.916	157.133	145.165	149.994	8028.5	5535.74	0.536406	9.72e-05	0.000991961	6208.42	4865.49	0.351748	0.0145321	0.0290175	7594.34	5130.48	0.565998	5.06e-05	0.000139449	5796.95	6597.42	-0.186546	0.147294	0.224841	7118.37	6937.26	0.0373312	0.758204	0.822771	6318.58	5330.33	0.245454
Aco012728	114.766	138.942	124.3	144.916	164.1	150.563	378.57	444.489	358.632	423.98	443.498	374.563	138.887	166.304	162.348	314.28	300.169	343.364	358.348	330.596	337.963	3626.15	2989.7	0.278384	0.0238379	0.0890854	8383.35	2627.64	1.67385	3.43e-30	6.6e-29	9264.01	2771.05	1.74141	7.86e-43	1.88e-41	7827.79	2979.98	1.39344	1.07e-26	2.16e-25	8684.02	3133.37	1.47097	8.59e-42	2.37e-40	7708.85	7197.65	0.0990858
Aco006348	67.2617	86.3223	82.2625	113.524	137.861	128.145	123.498	143.401	165.038	144.319	129.013	145.099	96.6363	106.091	112.537	136.996	147.852	118.802	123.957	116.063	119.626	6564.38	4088.06	0.6832	2.35e-06	4.06e-05	6720.13	3593.3	0.903302	1.67e-07	6.77e-07	6841.65	3789.81	0.85224	3.53e-10	1.62e-09	6274.57	5394.36	0.218252	0.144052	0.220683	6413.33	5672.22	0.177241	0.115559	0.18353	5693.79	5769.53	-0.0192491
Aco022276	125.532	131.165	127.729	144.79	168.307	169.404	145.36	150.204	141.236	196.75	187.472	173.607	132.004	146.6	144.28	140.6	143.803	155.207	145.9	140.763	155.491	6588.55	5263.34	0.323987	0.00322348	0.0184529	5364.17	4624.31	0.214121	0.0225299	0.0432693	7200.25	4876.84	0.562228	2.65e-09	1.13e-08	5008.74	5413.88	-0.112224	0.33696	0.440039	6749.86	5692.78	0.245814	0.0224349	0.0430551	5992.37	4606.02	0.379719
Aco022226	235.457	258.839	232.443	385.979	490.396	407.456	434.072	480.875	415.669	510.965	572.48	461.79	333.119	397.861	353.474	410.917	440.707	352.496	373.074	320.985	404.803	6787.59	3851.85	0.817257	1.62e-09	6.51e-08	6325.24	3384.66	0.90219	6.19e-14	4.52e-13	7722.59	3569.24	1.11365	2.69e-19	2.27e-18	5906.1	5578.32	0.0825161	0.550062	0.644984	7238.68	5865.55	0.303716	0.021506	0.0414664	6425.41	5430.92	0.242715
Aco003277	106.567	146.746	128.272	203.612	213.798	213.216	189.925	179.777	189.06	178.705	188.516	193.832	197.3	209.404	217.284	167.227	214.394	189.569	98.6867	93.4181	123.656	7440.27	4512.02	0.721655	4.31e-07	9.32e-06	5930.11	3966.7	0.580209	0.000203256	0.000560419	6259.73	4183.32	0.581517	7.06e-05	0.000190889	5537.2	6114.13	-0.142959	0.157591	0.23795	5866.98	6428.82	-0.131977	0.13109	0.204517	5208	5092.34	0.0323424
Aco015262	92.5712	109.449	96.3707	108.654	113.073	119.578	141.036	137.486	131.602	100.887	113.567	118.117	152.214	167.217	144.725	248.003	224.485	236.269	252.822	249.981	237.215	4402.71	3859.07	0.19036	0.0953538	0.243481	4758.54	3391.57	0.488652	5.88e-05	0.000175871	4057.63	3576.57	0.182089	0.148765	0.222413	4443.27	3617.77	0.296363	0.005476	0.0123478	3802.72	3804.04	-0.000718675	0.994571	0.996054	3375.39	4086.22	-0.275753
Aco002533	38.7231	37.9841	31.279	106.034	83.6562	70.6973	198.499	214.088	264.52	214.603	211.829	238.612	48.8136	58.678	68.9916	244.183	244.759	216.449	266.578	212.905	246.794	3503.64	1457.67	1.26529	1.2e-11	7.45e-10	8198.33	1280.58	2.67886	1.89e-54	9.24e-53	8463.43	1350.2	2.64841	4.68e-91	3.84e-89	7654.8	2880.07	1.41044	8.85e-15	7.94e-14	7932.56	3027.78	1.38965	4.86e-20	5.05e-19	7041.92	7039.05	0.000416162
Aco023960	60.3937	79.5247	76.3138	97.2999	88.5315	87.9047	210.648	205.449	218.272	164.123	158.718	172.003	75.6201	69.9398	73.05	188.197	144.721	157.718	242.924	209.715	187.219	4078.35	3229.08	0.336893	0.0173366	0.0698683	8502.74	2838.41	1.58291	1.24e-26	1.97e-25	6971.91	2993.7	1.21965	1.82e-18	1.48e-17	7939.32	3351.71	1.24416	8.1e-31	2.03e-29	6534.95	3524	0.89091	3.7e-21	4.11e-20	5801.37	7301.29	-0.331852
Aco004069	93.239	50.5688	61.9325	27.9736	26.5314	42.8383	148.174	115.601	373.431	134.286	165.876	148.58	68.5874	57.5633	96.9031	211.939	140.833	299.652	284.842	215.815	513.044	1277.75	2712.26	-1.08543	7.44e-05	0.000796916	7536.64	2379.37	1.66337	6.81e-05	0.000201954	5572.34	2509	1.15109	3.72e-07	1.3e-06	7036.51	1049.49	2.74508	4.43e-06	1.66e-05	5222.2	1103.65	2.24124	7.69e-35	1.63e-33	4635.02	6471.45	-0.481544
Aco005038	0.13107	0.645655	0.361399	16.0031	6.21965	3.9879	276.667	383.663	291.882	292.409	414.199	224.5	3.39138	20.84	6.8563	1274.71	848.898	1486.03	1391.35	595.068	1564.74	123.681	5.3767	4.53493	2.09e-10	1.02e-08	4042.65	4.73851	9.76518	1.09e-127	2.93e-125	4156.92	4.9964	9.72658	2.41e-111	3.1e-109	3774.65	101.727	5.2139	1.34e-18	1.62e-17	3896.17	106.902	5.18796	3e-15	2.33e-14	3457.71	3470.31	-0.00510182
Aco005505	77.3557	69.2922	61.3197	71.8937	68.1062	78.7989	147.682	136.503	153.149	150.887	178.133	146.593	103.036	101.023	88.8468	150.316	114.161	133.264	160.112	166.576	208.339	3684.44	3513.71	0.0687554	0.615497	0.789038	6625.96	3086.12	1.10246	3.78e-15	3.03e-14	7574.26	3254.02	1.219	7.05e-18	5.56e-17	6186.93	3027.41	1.03091	2.32e-18	2.75e-17	7099.09	3183.26	1.15692	2.89e-23	3.6e-22	6301.18	5689.96	0.147232
Aco005788	93.0245	44.6171	34.2299	63.1682	85.0043	62.9888	330.487	278.657	217.252	218.226	278.313	288.517	164.75	131.557	139.212	186.151	239.178	173.664	315.478	280.573	303.436	2379.84	1946.15	0.290171	0.392587	0.615603	8372.94	1706.66	2.29457	7.97e-11	4.52e-10	8367.81	1798.68	2.21794	7.89e-12	4.19e-11	7818.62	1956.03	1.9993	5.38e-26	1.06e-24	7840.97	2056.72	1.9312	1.47e-33	2.98e-32	6959.09	7191.33	-0.0472893
Aco009472	254.082	251.433	262.546	252.799	251.313	264.414	194.846	211.295	179.393	277.288	293.657	255.232	192.733	200.533	223.405	196.99	215.849	209.629	205.827	164.269	181.101	6823.98	6839.14	-0.00315732	0.97014	0.987774	4675.76	6007.94	-0.361791	0.00127347	0.00310922	6936.12	6336.38	0.13053	0.184976	0.267612	4365.95	5607.52	-0.361216	0.00141015	0.00357056	6501.64	5896.12	0.141073	0.135643	0.210493	5771.46	4014.76	0.523795
Aco012365	29.8879	21.554	23.4684	52.2552	42.5501	38.8927	338.222	276.397	428.216	247.932	259.977	257.581	64.6931	74.4279	83.2495	435.847	334.175	332.777	946.115	631.153	666.553	1054.66	593.071	0.830194	2.37e-05	0.000300379	7404.58	520.621	3.83001	1.82e-69	1.4e-67	5710.82	549.009	3.37841	3.35e-114	4.7e-112	6913.85	866.875	2.99584	5.4e-56	3.62e-54	5352.69	911.369	2.55451	8.76e-87	7.9e-85	4751.52	6358.94	-0.42051
Aco018563	40.2135	44.5397	43.3432	44.1069	45.1525	45.4042	36.3252	34.7814	35.7784	36.1369	34.2276	31.4097	23.052	24.1589	22.6241	27.8535	22.7862	23.5067	41.3759	39.682	35.0968	7734.49	7376.51	0.0683879	0.446354	0.662877	5522.23	6481.73	-0.231101	0.0238818	0.0455656	5525.82	6835.88	-0.306807	0.00339737	0.00727097	5156.35	6355.93	-0.301752	0.00210432	0.00515837	5180.24	6683.03	-0.367342	8.48e-05	0.000247375	4598.93	4742.04	-0.0440968
Aco017758	67.0581	81.9392	77.6704	82.1912	79.3295	84.9685	184.404	198.179	181.55	149.658	152.165	162.221	103.676	99.7683	106.824	185.428	161.929	176.911	206.99	199.117	168.248	3649.82	3364.65	0.117556	0.317958	0.542906	7513.26	2957.15	1.34529	1.45e-25	2.17e-24	6498.2	3118.78	1.05909	1.04e-18	8.6e-18	7015.39	2999.19	1.22578	7.53e-32	1.96e-30	6090.61	3153.52	0.949331	4.53e-26	6.5e-25	5406.67	6451.12	-0.254856
Aco021174	179.719	238.712	299.248	191.723	191.478	214.781	38.1397	48.0793	41.8969	26.492	13.1889	24.0884	356.895	332.018	450.74	86.7056	152.834	178.8	105.659	87.8108	69.5594	7034.97	8460.05	-0.266127	0.165225	0.357617	1355.53	7435.47	-2.45555	2.35e-30	4.58e-29	708.982	7845	-3.46819	1.96e-36	3.69e-35	1265.67	5780.48	-2.19124	8.31e-61	6.46e-59	664.848	6078.12	-3.19295	1.37e-51	5.19e-50	590.515	1163.72	-0.979131
Aco012662	85.7563	89.3323	93.0503	126.077	227.686	135.923	227.732	252.728	221.097	297.39	348.134	312.677	133.051	119.202	109.961	388.453	380.213	298.347	406.883	362.96	264.42	4347.67	2385.58	0.865621	0.000186703	0.00173678	5598.31	2095.88	1.41734	3.34e-36	8.48e-35	8040.56	2210.51	1.86287	9.31e-64	4.01e-62	5227.33	3573.76	0.548923	0.0110164	0.0232855	7535.8	3757.92	1.00418	7.03e-07	2.63e-06	6688.81	4806.75	0.476748
Aco008661	120.374	135.704	136.709	148.961	140.721	132.769	382.133	428.704	403.961	357.164	394.783	340.49	156.432	153.019	162.322	364.075	295.4	363.993	745.603	673.164	575.223	2764.84	2577.29	0.101172	0.366365	0.591046	7151.05	2264.71	1.65886	4.54e-45	1.61e-43	6760.61	2388.57	1.50107	1.72e-38	3.56e-37	6677.1	2272.3	1.55526	2.16e-42	8.72e-41	6336.81	2389.11	1.40755	5.68e-41	1.51e-39	5624.91	6139.83	-0.126325
Aco008433	33.7246	43.5197	42.7561	47.7546	50.4031	53.8175	95.8524	80.9035	96.3961	86.3108	75.4477	81.4226	53.1992	56.891	61.609	141.501	127.888	135.81	173.534	145.691	146.177	3532.16	2795.34	0.337617	0.0162359	0.0664627	5711.81	2457.02	1.21709	4.26e-14	3.15e-13	5343.22	2591.49	1.04396	1.18e-13	7.11e-13	5333.41	2902.37	0.877764	5.81e-12	4.12e-11	5009.01	3051.83	0.714699	3.22e-12	1.99e-11	4447.15	4905.34	-0.141508
Aco026331	14.2524	15.8531	18.3707	14.601	15.2786	16.8688	27.6382	21.9199	33.8091	23.9712	19.6039	24.5887	18.7043	18.0795	18.9311	33.4685	26.8659	35.5448	51.2445	45.9538	36.11	3717.8	3864.56	-0.055849	0.685475	0.833201	5967.13	3395.56	0.813407	5.42e-05	0.000162636	5125.34	3581.88	0.516776	0.000631676	0.00150927	5571.7	3054.82	0.86705	5.09e-07	2.15e-06	4804.62	3212.15	0.580633	2.67e-06	9.38e-06	4265.85	5124.63	-0.264771
Aco006420	63.1881	72.4967	73.9591	79.7343	88.2131	78.2901	78.5128	70.1084	86.9964	84.7207	70.24	83.1221	91.43	99.0681	95.042	118.282	123.008	123.385	118.273	102.741	107.662	5366.67	4579.99	0.22848	0.0502966	0.155398	4619.92	4024.64	0.199094	0.165515	0.251068	4905.1	4244.87	0.208502	0.105616	0.165168	4313.79	4410.54	-0.0317485	0.810386	0.863919	4598.29	4637.48	-0.0121197	0.915997	0.941882	4082.65	3967.36	0.0411642
Aco014138	173.638	160.501	148.502	84.0414	144.615	106.948	127.696	153.211	140.728	164.685	186.513	140.223	229.492	215.983	199.348	238.987	217.273	262.878	302.11	251.904	324.808	3487.9	5029.19	-0.528205	0.0110638	0.0493655	3939.2	4417.45	-0.165204	0.21562	0.314161	4826.29	4658.11	0.0513345	0.720394	0.789124	3678.09	2866.48	0.359994	0.06786	0.116558	4524	3014.3	0.586154	0.00217921	0.00512864	4015.71	3381.95	0.247884
Aco030337	134.325	115.176	88.9842	775.967	621.822	310.919	303.311	281.525	265.971	169.271	221.831	215.932	13.3474	13.9804	12.8127	63.56	66.4205	50.9331	56.9255	41.722	31.7434	19453.6	3867.04	2.33075	2.35e-14	2.32e-12	8712.26	3396.19	1.3592	1.24e-13	8.78e-13	6537.87	3580.36	0.868774	4.59e-06	1.43e-05	8135.14	15998.2	-0.975642	0.000189638	0.000558429	6126.31	16816.4	-1.45677	7.17e-05	0.000211298	5437.17	7481.73	-0.460512
Aco005458	130.169	146.578	150.213	157.552	161.691	171.85	122.248	115.397	116.662	162.376	160.552	159.847	80.6762	86.0963	73.9841	79.0912	72.9189	65.2664	126.542	113.894	117.484	7980.56	6955.93	0.198285	0.0594386	0.175935	5179.23	6112.24	-0.239002	0.0347497	0.0639131	7418.04	6446.67	0.202476	0.0441095	0.0764416	4836.1	6557.75	-0.439454	2.25e-05	7.64e-05	6953.35	6895.36	0.0120029	0.886685	0.921749	6172.74	4447.58	0.472949
Aco026733	118.949	115.315	125.935	127.932	140.651	133.7	84.8495	91.9139	87.3914	106.443	105.421	101.49	133.712	125.186	117.968	121.099	123.247	120.901	101.18	96.5046	96.6774	6944.22	6234.66	0.155323	0.112095	0.273426	4100.97	5476.61	-0.41736	4e-05	0.000122351	5113.8	5776.25	-0.175779	0.048071	0.0825298	3829.2	5706.64	-0.575489	8.57e-08	4e-07	4793.56	6000.39	-0.323777	0.000290162	0.000780434	4255.43	3521.18	0.273262
Aco010785	49.9852	49.7036	46.6721	49.3514	59.212	54.5878	204.897	190.159	181.814	164.164	164.717	173.225	59.1085	62.0507	66.6144	112.448	78.2052	90.4261	210.523	193.275	179.977	2921.39	2627.99	0.152535	0.200272	0.40574	9289.6	2308.7	2.0086	2.68e-75	2.35e-73	8500.57	2434.6	1.80398	7.57e-88	5.87e-86	8674.23	2400.72	1.85346	8.37e-51	4.65e-49	7967.6	2524.36	1.65853	2.86e-56	1.22e-54	7072.98	7977.51	-0.173583
Aco005500	111.513	139.412	111.384	156.309	140.39	179.844	271.806	324.431	289.624	239.121	203.997	217.253	87.8967	90.5466	91.8482	162.696	117.229	157.687	270.43	242.766	316.764	5211.93	3973.33	0.391798	0.0108179	0.0485309	8714.91	3492.58	1.31935	7.24e-18	6.96e-17	6828.61	3682.75	0.890991	1.33e-10	6.35e-10	8137.27	4282.16	0.925971	1.72e-11	1.16e-10	6401.76	4502.66	0.507389	3.5e-05	0.000107852	5683.83	7482.13	-0.396598
Aco006741	98.7059	99.9147	84.2259	94.201	123.54	107.088	408.293	296.733	295.553	240.112	245.659	270.122	78.4256	83.2898	81.2193	185.264	151.356	179.949	340.429	275.855	232.401	3571.09	3118.13	0.195594	0.195316	0.399005	9892.79	2739.49	1.85251	1.24e-24	1.77e-23	7857.23	2888.56	1.44381	6.38e-33	1.04e-31	9237.9	2934.7	1.65446	1.04e-21	1.57e-20	7364.18	3085.88	1.25511	3.35e-23	4.16e-22	6537.16	8497.69	-0.378355
Aco003002	187.974	145.521	166.341	142.754	149.263	127.771	294.729	327.263	263.883	241.533	268.338	232.471	188.936	180.962	182.933	211.576	179.607	166.5	234.931	232.517	237.968	4069.25	4860.69	-0.256649	0.0735015	0.203795	7721.47	4267.56	0.855358	3.41e-08	1.49e-07	6803.69	4500.72	0.596118	1.14e-05	3.4e-05	7209.85	3344.49	1.10835	6.03e-17	6.36e-16	6377.13	3516.45	0.859177	6.51e-15	4.94e-14	5660.67	6629.77	-0.22786
Aco019876	55.2358	53.6164	65.2018	56.3837	62.8415	59.483	84.1295	73.2981	99.094	79.0566	75.8902	87.9354	61.0609	62.9324	69.8274	86.6816	81.8862	85.0402	105.065	85.6948	84.2979	4746.9	4635.17	0.0341184	0.783905	0.891955	6130.88	4071.46	0.590543	0.000405018	0.00106911	6100.45	4294.81	0.506102	8.18e-05	0.00021919	5724.59	3900.92	0.553536	0.000141009	0.000424801	5717.88	4101.73	0.479274	4.43e-06	1.52e-05	5076.01	5264.94	-0.0528998
Aco005636	84.1109	92.4892	80.1132	83.8786	90.6112	82.174	114.414	122.41	113.834	135.641	169.172	146.776	106.763	127.62	112.787	163.01	164.256	159.207	162.726	175.723	187.366	3979.44	3990.87	-0.00419874	0.969883	0.987658	4889.48	3506.88	0.479646	3.64e-05	0.000111912	6621.53	3697.96	0.840567	1.76e-10	8.32e-10	4565.48	3270.42	0.481507	1.18e-05	4.14e-05	6205.51	3438.69	0.851923	2.57e-13	1.73e-12	5507.74	4198.28	0.391704
Aco000137	95.3308	113.505	109.256	115.678	118.575	115.77	154.814	167.495	159.25	153.291	146.955	170.943	132.909	131.193	134.372	141.992	137.445	120.693	108.139	118.306	104.68	5300.32	4828.59	0.134462	0.214545	0.423987	6558.67	4243.53	0.628193	2.5e-07	9.94e-07	6747.31	4475.5	0.592221	1.69e-06	5.52e-06	6124.02	4355.75	0.491641	1.13e-06	4.57e-06	6324.17	4579.86	0.465514	2.17e-06	7.71e-06	5614.24	5631.42	-0.00452687
Aco014843	196.866	252.955	205.365	235.399	224.055	228.081	188.669	224.16	178.457	194.562	231.33	232.067	201.361	214.71	215.015	227.42	258.724	227.159	227.592	223.806	215.62	6100.23	5827.86	0.066028	0.614783	0.788523	4717.75	5122.98	-0.118842	0.470181	0.588103	5522.12	5402.1	0.031753	0.831094	0.876582	4405.1	5013.08	-0.186606	0.141202	0.21687	5174.99	5270.93	-0.0266048	0.80353	0.857758	4593.24	4050.45	0.181441
novel.261	56.9677	92.915	63.378	50.2584	69.3024	68.2904	206.728	254.124	162.422	150.325	195.899	171.064	98.8415	107.727	88.6042	107.316	84.6546	90.4902	236.807	263.034	232.708	2793.35	3177.28	-0.185692	0.404009	0.625008	8330.2	2794.67	1.57577	1.52e-10	8.4e-10	7274.31	2946.63	1.30392	4.24e-10	1.93e-09	7778.26	2295.19	1.76084	6.64e-20	8.85e-19	6816.89	2413.57	1.49803	6.79e-22	7.86e-21	6050.13	7151.81	-0.241268
Aco012157	230.443	228.923	207.092	303.808	204.123	220.271	31.9696	24.5509	23.9172	14.203	17.169	19.3456	223.349	166.86	150.144	17.0637	34.5365	22.5718	21.6258	21.8463	25.9848	12532.1	11506.9	0.123176	0.47788	0.68792	1245.57	10108.9	-3.02123	3.31e-79	3.23e-77	826	10659.8	-3.69061	3.17e-140	7.02e-138	1163.1	10300.2	-3.14701	3.15e-63	2.57e-61	774	10828.5	-3.80689	5.72e-108	8.13e-106	686.975	1069.85	-0.639125
Aco018515	21.5145	25.1476	19.4094	43.1144	49.2918	25.1728	69.1364	51.4575	77.4041	75.7704	76.3417	83.518	24.2127	30.1464	25.4664	108.868	84.5216	101.947	105.804	118.581	125.046	3669.27	2066.85	0.827901	0.00087376	0.00632623	5558.98	1816.53	1.61388	1.07e-15	8.88e-15	6951.56	1915.31	1.8601	4.36e-43	1.06e-41	5190.68	3017.04	0.783114	0.00123129	0.00315554	6515.49	3171.84	1.03893	4.63e-07	1.77e-06	5783.87	4774.44	0.276587
Aco003692	73.3038	98.4265	83.5818	121.799	112.048	131.06	188.402	232.852	218.277	180.687	194.255	174.47	92.8596	101.125	87.6058	202.908	186.267	172.148	196.824	187.954	191.871	4737.72	3322.94	0.512013	0.000479687	0.0038401	7468.82	2921.23	1.35446	3.23e-16	2.78e-15	6745.6	3080.61	1.13091	1.79e-15	1.21e-14	6973.7	3892.89	0.840951	1.2e-10	7.52e-10	6322.8	4093.25	0.627069	8.69e-10	4.35e-09	5612.6	6412.06	-0.192147
Aco011047	15.0987	26.9733	18.5917	94.8738	79.3178	73.0815	178.053	203.893	182.421	96.0886	123.8	137.846	21.9533	26.824	37.6399	156.934	120.873	106.396	84.719	81.5105	77.1043	5548.63	1364.01	2.02457	1.89e-19	4.14e-17	11390.6	1199.97	3.24713	2.17e-46	8.09e-45	7595.9	1265.27	2.58606	4.21e-28	5.6e-27	10635.7	4560.58	1.22169	1.2e-18	1.46e-17	7117.24	4794.73	0.569839	0.000280887	0.000757234	6316.68	9779.74	-0.630714
novel.403	121.594	122.587	123.519	175.562	220.749	167.359	150.106	157.838	121.315	125.881	141.421	136.83	161.653	170.576	175.959	167.033	179.299	165.36	178.938	143.815	141.865	7062.26	4618.63	0.612443	1.35e-05	0.000186421	4834.9	4057.51	0.252749	0.0724657	0.122844	4787.36	4279.18	0.161846	0.09423	0.149372	4514.61	5804.62	-0.362539	0.0244773	0.0474014	4486.83	6103.31	-0.44366	0.000772604	0.00195668	3982.66	4151.58	-0.0597723
Aco014018	77.0137	87.3767	83.2779	130.414	120.009	128.023	122.63	130.035	131.422	168.649	148.069	146.771	104.501	119.992	119.758	131.793	137.41	145.912	178.485	165.096	179.553	5633.35	3696.51	0.60801	1.87e-09	7.41e-08	5143.18	3248.31	0.663116	2.24e-09	1.11e-08	6522.22	3425.75	0.929069	9.2e-17	6.8e-16	4802.33	4629.27	0.0529222	0.614349	0.70264	6114.61	4867.38	0.329069	0.000961418	0.00239571	5428.79	4416.1	0.297842
Aco012066	55.4538	52.4175	66.8579	50.9854	53.8701	55.6872	108.63	93.9463	111.639	86.4727	85.1059	87.7546	73.4429	78.8539	94.5167	81.3803	83.0442	87.06	136.333	99.8536	114.624	3767.14	4110.86	-0.126123	0.343838	0.568611	6633.49	3610.67	0.877386	7.79e-09	3.63e-08	5753.86	3808.91	0.594932	2.88e-06	9.16e-06	6194	3095.56	1.00068	2.74e-16	2.75e-15	5393.31	3254.93	0.728444	1.51e-16	1.27e-15	4787.84	5696.75	-0.250827
Aco015076	56.2916	65.5631	68.2058	56.4749	57.3523	58.5398	136.827	116.38	117.435	98.9763	106.86	113.744	54.4557	51.9736	53.0146	122.085	88.1734	97.0212	178.237	164.829	130.334	3613.84	3994.5	-0.144505	0.207061	0.414725	6990.16	3510.22	0.993686	1.73e-12	1.12e-11	6337.02	3702.42	0.775245	6.64e-10	2.98e-09	6527.19	2969.69	1.13605	7.54e-22	1.15e-20	5939.11	3122.52	0.927401	8.71e-22	1e-20	5271.89	6003.34	-0.187424
Aco006608	49.8537	60.6001	57.4584	58.7502	54.5366	64.3623	37.5515	29.7444	35.7458	32.4664	30.5008	31.4859	64.5394	58.2165	61.3484	28.4154	32.5865	38.1101	47.6646	50.8945	52.6495	7188.55	6811.91	0.0778091	0.536845	0.734878	3751.9	5986.85	-0.674156	1.18e-05	3.86e-05	3614.02	6314.05	-0.804926	3.72e-12	2.03e-11	3503.38	5906.6	-0.753705	5.11e-08	2.44e-07	3387.76	6210.65	-0.874643	2.83e-18	2.63e-17	3007.57	3222.36	-0.0995046
Aco001466	87.4962	106.428	106.715	75.2168	78.609	77.9676	154.802	172.151	248.79	149.924	137.053	142.471	108.79	129.458	127.24	240.836	200.791	317.753	243.97	215.56	298.426	2765.15	3594.87	-0.378634	0.00193007	0.0121116	6180.81	3159.37	0.968272	6.63e-06	2.24e-05	4843.3	3332.28	0.539496	1.28e-05	3.79e-05	5770.9	2272.31	1.34481	2.41e-13	1.92e-12	4540.22	2389.26	0.926294	3.35e-24	4.37e-23	4030.8	5306.57	-0.396892
Aco008298	41.0436	42.2648	37.7576	50.2315	45.2159	47.7801	449.92	443.631	404.505	526.466	646.048	525.101	36.9857	37.9382	42.2411	146.505	97.2237	107.707	516.076	527.079	534.135	1183.39	1003.27	0.238988	0.0457156	0.145049	9646.98	881.457	3.45254	1.38e-193	1.14e-190	13265.6	929.49	3.83548	1.28e-184	5.18e-182	9007.87	972.488	3.21105	1.13e-176	8.93e-174	12432.9	1022.5	3.60372	3.42e-201	2.17e-198	11035.1	8283.94	0.413792
Aco007590	75.5066	93.4905	82.1156	84.1103	85.2513	79.2002	212.078	191.538	204.446	184.689	191.84	182.632	109.298	116.551	155.985	171.298	194.254	230.295	294.301	263.84	268.646	2968.46	3006.26	-0.0182688	0.881807	0.944829	6532.4	2642.34	1.30595	2.82e-22	3.55e-21	6314.05	2786.52	1.18031	4.26e-23	4.47e-22	6099.63	2439.59	1.32229	5.25e-33	1.43e-31	5918.32	2565.06	1.20656	1.35e-41	3.7e-40	5253.69	5609.8	-0.094569
Aco009564	108.536	56.5244	56.0742	65.2523	80.0214	71.339	68.2196	66.3779	57.5121	51.4704	52.5687	64.7749	163.289	171.185	187.892	54.6813	67.0193	61.2575	58.4387	59.9048	52.6972	5106.35	5235.46	-0.0360592	0.891841	0.949805	4072.2	4592.32	-0.17345	0.527286	0.64162	3763.5	4841.29	-0.363377	0.166817	0.24532	3802.45	4196.37	-0.142194	0.293424	0.394903	3527.05	4412.48	-0.323165	0.0158386	0.0314897	3130.92	3496.91	-0.15955
Aco023121	65.8067	97.0512	79.8608	182.391	187.754	168.95	285.314	303.671	318.599	238.547	241.566	228.451	104.288	101.381	110.675	248.348	240.858	227.323	306.85	257.897	289.618	5285.7	2384.83	1.14831	2.52e-12	1.8e-10	8004.34	2096.96	1.93269	4.62e-28	7.88e-27	6568.32	2211.38	1.5708	8.3e-23	8.59e-22	7473.84	4344.1	0.78303	3.22e-12	2.34e-11	6156.89	4567.5	0.431098	2.83e-06	9.93e-06	5465.6	6872.73	-0.330546
Aco012715	126.788	146.016	136.365	168.249	206.233	188.05	73.7308	76.4349	64.5725	82.8866	85.4241	89.8523	122.488	135.165	113.763	109.428	117.111	113.595	111.972	103.518	99.2872	8995.5	6558.86	0.45571	0.000266634	0.00233789	3087.64	5763.83	-0.900643	2.85e-12	1.81e-11	3903.39	6078.57	-0.639045	1.65e-09	7.16e-09	2883.08	7392.28	-1.35848	2.04e-24	3.61e-23	3658.53	7773.02	-1.08718	8.46e-23	1.03e-21	3247.66	2651.27	0.292858
Aco006849	82.3163	84.0501	74.1701	77.6763	90.671	84.9007	97.0832	107.819	103.595	157.571	137.019	125.423	72.7169	86.7063	77.9126	99.459	95.6673	106.701	118.487	100.341	114.946	4941.5	4706.59	0.0702447	0.550604	0.744858	5413.58	4135.09	0.388825	0.000834788	0.00209776	7745.02	4360.34	0.828995	6.23e-11	3.06e-10	5054.79	4060.79	0.316065	0.0074974	0.0164141	7261.49	4269.89	0.766273	2.01e-10	1.06e-09	6447.18	4648.09	0.472067
Aco001406	10.0701	16.23	5.66783	35.9885	33.4439	25.8502	121.683	135.812	125.997	116.32	134.802	136.432	8.92069	14.5775	17.6714	198.894	128.862	133.707	314.385	307.565	222.312	1797.8	604.733	1.57253	2.69e-06	4.56e-05	6507.62	532.097	3.61323	8.45e-28	1.42e-26	6916.17	560.661	3.62569	4.12e-31	6.26e-30	6076.34	1477.83	2.04028	1.51e-40	5.66e-39	6481.56	1553.69	2.06121	5.13e-46	1.6e-44	5753.07	5587.43	0.0420768
Aco002479	49.9014	44.5838	51.4106	62.1818	52.7202	53.3821	155.375	160.927	227.682	164.526	165.412	149.582	52.0785	64.3002	62.8052	116.922	101.233	104.261	113.353	122.633	136.821	3201.19	2783.75	0.20146	0.111937	0.27317	9313.3	2444.82	1.92957	2.36e-24	3.3e-23	8624.94	2578.64	1.74172	1.16e-58	4.43e-57	8695.78	2630.88	1.72484	3.81e-23	6.29e-22	8085	2766.05	1.54742	6.56e-47	2.1e-45	7177.32	7996.5	-0.156014
Aco018139	43.9734	48.5846	48.3457	54.1996	49.2052	61.0171	143.666	182.08	205.501	161.701	148.103	165.877	47.914	48.616	45.9879	99.0274	75.5485	90.9453	125.841	171.67	129.422	3231.14	2776.58	0.21915	0.0816258	0.218922	9393.24	2439.74	1.94499	1.41e-30	2.77e-29	8839.93	2573.11	1.7805	1.06e-65	4.82e-64	8770.32	2654.81	1.72386	2.86e-26	5.67e-25	8286.27	2791.49	1.56914	5.34e-44	1.56e-42	7356.44	8063.89	-0.132603
Aco000210	113.747	90.3188	102.723	132.417	131.256	108.867	148.173	153.82	179.277	226.616	210.099	177.504	172.406	197.504	193.598	254.129	213.324	278.409	246.755	210.207	289.356	3897	3219.38	0.275288	0.0627561	0.182539	4529.05	2826.69	0.680119	7.26e-06	2.44e-05	6072.53	2981.15	1.02641	1.65e-12	9.23e-12	4228.84	3203.11	0.401162	0.00475742	0.0108632	5693.25	3367.7	0.757865	1.04e-08	4.73e-08	5054.53	3888.79	0.378206
Aco002897	233.094	289.175	268.876	294.754	412.578	359.556	154.85	181.588	133.858	100.685	98.0396	104.911	136.665	145.734	118.84	58.3225	61.2841	68.7111	92.1709	82.6158	90.3317	12009.5	8924.7	0.428261	0.00854982	0.0404281	4758.72	7844.14	-0.7211	1.42e-05	4.6e-05	3231.05	8272.73	-1.3564	4.23e-29	5.85e-28	4443.4	9868.99	-1.15126	9.21e-12	6.41e-11	3028.55	10377.7	-1.77676	2.07e-39	5.23e-38	2688.57	4085.71	-0.603685
Aco007608	148.23	169.169	177.518	241.047	289.912	230.495	92.6806	83.6614	79.0836	84.65	87.6763	84.761	121.216	117.667	114.069	73.3874	81.0945	75.2424	76.1429	76.3953	62.5151	11617.6	7568.07	0.618187	9.44e-06	0.00013643	3504.5	6650.24	-0.924353	4.75e-12	2.97e-11	3708.15	7014.37	-0.919623	1.34e-16	9.8e-16	3272.38	9548.52	-1.54495	9.45e-29	2.13e-27	3475.72	10039.8	-1.53017	1.86e-39	4.71e-38	3085.4	3009.61	0.0361255
Aco022396	49.3067	58.8501	61.484	81.3102	65.7467	69.4798	120.235	118.109	191.743	147.07	127.848	138.585	71.9491	79.9409	74.3831	110.234	111.173	106.114	64.5299	71.5261	78.9697	4452.54	3497.11	0.348502	0.014886	0.0619293	7961.27	3073.28	1.37329	1.74e-09	8.68e-09	8039.54	3241.6	1.31037	3.65e-24	4.06e-23	7433.34	3659.23	1.02254	3.75e-07	1.61e-06	7536.71	3847.22	0.970004	7.35e-17	6.34e-16	6691.36	6835.81	-0.0309443
Aco004904	117.039	161.614	132.721	223.022	260.099	190.316	294.968	333.014	328.734	277.091	286.346	242.949	210.143	225.749	230.947	236.871	236.027	216.324	276.47	277.149	308.009	5415.72	3315.14	0.708004	6.47e-05	0.000709353	6918.85	2914.59	1.24742	1.99e-14	1.51e-13	6129.46	3073.53	0.996079	1.36e-10	6.52e-10	6460.26	4451.6	0.53758	0.000284195	0.000814795	5745.79	4680.49	0.296236	0.031892	0.0590169	5100.62	5940.4	-0.219846
Aco010373	148.408	182.543	173.513	235.788	263.32	246.307	206.889	250.562	163.773	194.223	170.3	186.02	52.1006	53.9706	53.6282	59.2483	61.1375	46.0581	73.687	64.0643	62.8981	10335.1	7010.57	0.559927	4.11e-06	6.62e-05	7742.67	6161.58	0.32949	0.083728	0.13923	7215.83	6498.39	0.151104	0.225198	0.316935	7229.67	8493.33	-0.232446	0.157569	0.237935	6764.4	8930.52	-0.400719	5.37e-05	0.000161017	6005.61	6647.49	-0.146422
Aco006528	132.919	154.547	128.622	131.151	136.271	133.285	198.921	214.428	181.519	177.727	181.665	190.276	193.009	196.854	192.036	203.493	200.683	198.466	194.162	189.546	194.76	4307.15	4484.34	-0.0580433	0.61373	0.787858	5750.17	3941.05	0.545099	7.81e-05	0.000229505	5587.05	4155.71	0.427117	0.000254935	0.000641351	5369.17	3539.54	0.601113	1.43e-07	6.48e-07	5236.65	3721.69	0.492708	1.45e-08	6.49e-08	4648.59	4937.31	-0.0868891
Aco011207	156.286	200.12	195.128	177.402	171.798	182.428	225.536	218.476	196.352	191.27	176.191	209.954	165.817	157.548	167.679	156.334	138.421	158.655	260.151	222.645	187.563	5438.56	5655.43	-0.0563391	0.665142	0.821082	5892.13	4970.89	0.245244	0.0996499	0.161976	5586.05	5242.88	0.0914147	0.523983	0.630067	5501.81	4469.09	0.299731	0.00685512	0.0151403	5235.9	4699.06	0.155832	0.128928	0.20164	4648.29	5059.73	-0.122363
Aco020377	81.2244	96.5657	103.658	92.9409	106.216	104.949	155.916	158.625	175.342	120.884	125.267	147.447	96.6065	106.45	117.196	120.675	134.682	116.126	102.92	102.346	107.512	4968.32	4608.57	0.108352	0.42329	0.64221	7199.36	4049.95	0.829984	6.18e-09	2.9e-08	6081.57	4271.91	0.509439	0.000488358	0.0011833	6722.22	4082.63	0.719564	1.62e-09	9.13e-09	5699.57	4292.9	0.40882	0.000551772	0.00142708	5059.4	6181.78	-0.289256
Aco018922	80.1922	84.0711	95.9672	82.9082	84.1339	93.7574	80.7787	69.7411	70.9107	69.8597	61.3157	73.5587	89.6377	85.0097	87.5585	84.2644	78.3012	74.7594	83.7878	78.4759	73.2959	6090.25	6092.76	-0.00056696	0.996233	0.998607	4651.59	5352.74	-0.202699	0.130097	0.204383	4520.79	5646.17	-0.320866	0.0126208	0.0244684	4343.49	5004.22	-0.204498	0.0929681	0.152774	4237.65	5261.91	-0.312579	0.00496554	0.0109282	3762.24	3994.85	-0.0865536
Aco017969	609.815	656.07	652.66	995.304	977.228	882.23	549.462	573.423	412.892	630.865	642.668	518.762	469.288	529.414	554.341	438.121	505.872	465.213	582.77	397.31	353.436	9098.88	6131.06	0.569448	1.58e-08	5e-07	4401.17	5386.97	-0.291734	0.072136	0.122375	5400	5681.38	-0.0731332	0.551984	0.655143	4109.65	7478.14	-0.863789	1.53e-08	7.74e-08	5062.24	7862.58	-0.634991	6.86e-08	2.88e-07	4493.91	3779.21	0.250161
Aco013293	33.3131	40.8474	27.4306	72.415	74.7677	45.3073	397.174	394.788	376.54	360.836	404.125	448.629	32.7506	47.3418	41.7844	289.196	203.821	218.432	363.45	396.392	323.365	1786.57	945.329	0.918261	0.0001304	0.00127035	9752.95	830.978	3.55373	3.11e-91	4.05e-89	10652.4	876.049	3.60473	6.78e-93	5.84e-91	9106.77	1468.86	2.63295	6.38e-44	2.73e-42	9982.8	1544.22	2.69329	7.62e-49	2.57e-47	8860.98	8374.82	0.081366
Aco010162	25.323	28.7064	29.5759	29.7035	35.0485	33.2226	37.1003	33.445	42.1029	37.33	30.3501	36.2166	34.0244	32.5498	33.9834	32.7127	33.2404	32.7731	35.2408	35.9946	32.4808	5554.63	4751.24	0.225267	0.0651607	0.187496	5745.7	4175.01	0.460779	0.0015285	0.0036827	5567.92	4403.49	0.338434	0.00963835	0.0190917	5364.95	4564.55	0.233259	0.0909471	0.149927	5219.75	4799.64	0.1211	0.31879	0.428796	4634.5	4934.07	-0.0905041
Aco007837	202.896	235.373	224.918	287.135	343.118	326.447	339.992	346.338	350.394	317.813	354.99	330.933	202.21	230.144	212.225	258.805	251.199	250.302	342.042	289.89	303.442	6400.37	4447.43	0.525144	1.94e-05	0.000254392	6237.97	3908.35	0.674605	1.61e-09	8.06e-09	6349.4	4121.91	0.623373	2.21e-08	8.69e-08	5824.61	5259.5	0.147347	0.209012	0.30043	5951	5530.41	0.105862	0.330432	0.44116	5282.35	5356.34	-0.0200801
Aco006106	27.6187	29.4433	34.5471	36.4664	31.6483	31.8827	95.9714	102.725	105.594	85.5921	84.4156	81.4066	40.7901	44.2792	49.2422	99.8997	85.6556	115.178	128.177	79.0324	96.5047	2743.52	2519.9	0.122498	0.36929	0.593941	7510.45	2213.89	1.76217	4.1e-39	1.18e-37	6522.33	2335.35	1.48154	5.03e-34	8.56e-33	7012.68	2254.73	1.63704	1.28e-43	5.45e-42	6113.9	2370.6	1.36683	1.13e-42	3.18e-41	5427.57	6448.64	-0.248731
Aco014993	90.5023	90.9439	84.3952	96.132	97.19	101.043	187.889	239.483	181.241	169.483	169.327	181.604	77.2419	74.0403	67.5181	199.702	156.165	165.555	233.98	250.55	229.561	3791.36	3433.96	0.143071	0.130081	0.304854	7048.36	3016.82	1.22428	8.25e-16	6.88e-15	6338.53	3181.32	0.994572	1.19e-25	1.41e-24	6581.21	3115.52	1.07881	1.37e-14	1.21e-13	5941.07	3275.87	0.858661	2.42e-22	2.88e-21	5274	6051	-0.198279
Aco011139	83.2113	84.768	76.7665	83.3713	98.335	83.8133	243.2	230.849	192.728	234.486	242.008	235.849	68.192	85.067	75.0092	183.04	164.206	171.091	312.639	248.72	237.316	3159.22	2919.99	0.113353	0.356845	0.582	7133.53	2565.39	1.47544	2.87e-26	4.46e-25	8013.01	2705.21	1.56682	5.04e-64	2.2e-62	6661.05	2596.4	1.35943	7.07e-22	1.08e-20	7510.74	2730.03	1.46057	1.04e-43	3.02e-42	6667.31	6125.95	0.122319
Aco001045	24.3437	27.5591	26.1306	29.1626	26.1583	26.7661	53.343	54.0209	55.4873	46.6202	45.7393	44.3833	40.7479	40.1265	41.4831	68.3417	62.8202	65.5806	88.2313	85.4685	83.6434	3144.65	2997.39	0.0693512	0.519095	0.720823	5612.3	2633.95	1.09152	3.41e-24	4.72e-23	4953.2	2777.81	0.834581	1.89e-17	1.45e-16	5240.39	2584.3	1.01988	3.96e-21	5.72e-20	4643.05	2717.16	0.772936	1.1e-16	9.33e-16	4121.85	4819.12	-0.225482
Aco000540	224.795	232.249	220.574	281.104	249.641	282.422	184.551	214.904	176.031	215.345	216.22	194.198	245.819	257.075	234.44	134.478	140.054	142.922	144.655	128.162	150.42	7368.95	6158.63	0.259064	0.00953292	0.0441005	4690.29	5410.81	-0.206194	0.0997567	0.162127	5361.84	5706.08	-0.0895962	0.345923	0.453756	4379.46	6055.26	-0.467594	0.00023873	0.000692441	5026.21	6366.75	-0.34114	0.000661709	0.0016909	4461.94	4026.95	0.148132
Aco009506	137.132	163.815	159.622	220.248	242.908	225.629	289.841	313.369	216.127	260.88	297.227	329.076	131.229	130.458	138.351	254.121	204.404	186.975	299.653	263.972	218.178	5926.92	3972.5	0.577151	7.98e-07	1.6e-05	6338.34	3491.17	0.860324	1.88e-06	6.74e-06	7220.71	3682.07	0.971575	3.81e-12	2.07e-11	5918.49	4870.75	0.281029	0.0749697	0.127069	6766.68	5121.44	0.40191	0.000587521	0.00151248	6006.19	5442.44	0.142259
Aco017087	160.255	180.412	153.316	172.036	184.802	179.325	196.988	218.784	159.458	185.316	204.285	194.011	188.219	187.165	191.702	191.789	195.348	199.869	284.534	251.317	221.13	5137.39	4745.91	0.114438	0.301369	0.525852	4955.57	4170.6	0.248771	0.128919	0.202699	5287.94	4397.8	0.266075	0.0190768	0.0357529	4627.27	4221.78	0.132215	0.358149	0.46171	4956.17	4439.08	0.15907	0.085759	0.141896	4399.34	4254.98	0.0482969
Aco017555	133.442	190.457	164.156	264.852	259.692	241.611	107.854	110.516	84.549	75.5126	76.545	81.8052	133.641	131.856	146.097	119.635	161.208	138.122	82.0875	69.5902	67.6367	10315.3	6585.38	0.647473	2.31e-05	0.000293165	3667.33	5789.94	-0.658889	0.000505293	0.00131362	2977.55	6106.12	-1.03614	3.12e-11	1.58e-10	3424.41	8477.64	-1.30798	5.18e-21	7.41e-20	2790.8	8913.54	-1.67541	6.38e-72	4.12e-70	2477.41	3149.12	-0.345957
Aco007333	162.678	81.4857	92.7887	87.4096	114.327	111.019	170.081	182.763	451.955	280.365	251.819	261.782	298.644	251.915	340.577	278.424	304.97	303.133	126.932	104.742	205.608	2763.26	2989.65	-0.113654	0.671077	0.824802	6402.71	2622.2	1.28796	0.00141408	0.00342602	6630.57	2764.69	1.26197	3.28e-07	1.15e-06	5977.73	2270.56	1.3966	0.0062341	0.0138853	6215.78	2387.61	1.38052	5.65e-27	8.49e-26	5518.45	5496.83	0.0056085
Aco012044	96.0161	90.7346	93.2161	85.8783	98.6566	89.3273	113.375	103.226	118.642	113.237	122.009	116.556	121.409	118.31	127.922	132.218	135.017	128.44	128.465	109.724	117.643	4531.86	4645.86	-0.0360965	0.734113	0.864003	4990.35	4080.84	0.290326	0.00992129	0.0205335	5504.42	4303.73	0.354964	7.64e-05	0.000205444	4659.69	3724.32	0.323496	0.00847106	0.0183087	5159.18	3916.03	0.398026	7.3e-05	0.00021485	4579.65	4285.45	0.0957293
Aco010114	96.1031	116.524	109.841	156.899	165.084	170.597	211.869	240.971	228.232	225.207	250.235	227.873	107.282	122.921	111.4	149.984	136.916	156.363	160.5	147.409	156.472	5717.81	3752.29	0.607782	1.57e-07	3.77e-06	7110.55	3297.8	1.10855	3.03e-17	2.79e-16	7720.02	3478.01	1.15044	1.32e-21	1.28e-20	6639.27	4698.49	0.498841	5.95e-06	2.19e-05	7235.78	4940.39	0.550522	5.04e-09	2.36e-08	6422.82	6104.97	0.0732061
Aco001498	62.3893	60.3886	67.5147	68.7869	80.1388	69.482	156.22	154.38	177.105	133.893	137.807	141.751	78.7421	71.3983	83.4781	148.887	138.949	151.896	189.64	168.859	171.179	3481.08	3040.9	0.19457	0.10337	0.258037	6992.2	2671.14	1.38825	2.15e-30	4.19e-29	6230.6	2817.36	1.14477	5.2e-32	8.2e-31	6528.8	2860.88	1.19073	1.25e-20	1.75e-19	5839.86	3008.13	0.957465	4.24e-20	4.42e-19	5184.04	6004.04	-0.212001
Aco009248	86.7755	89.0706	91.6095	52.9798	76.2176	72.1809	49.7978	45.7225	55.2483	54.5707	50.2204	62.741	79.7149	68.9611	69.4823	48.7347	52.5643	52.0244	47.1276	48.3498	46.9918	5900.76	7856.43	-0.413047	0.0106122	0.0478895	3973.82	6902.17	-0.796396	9.87e-11	5.55e-10	4641.26	7279.5	-0.649503	8.01e-08	2.99e-07	3710.49	4848.53	-0.385804	0.0209491	0.0412247	4350.18	5098.63	-0.229059	0.143322	0.220602	3861.95	3412.44	0.178267
Aco000410	121.938	111.477	126.539	72.2386	89.8442	90.3364	180.049	201.891	216.472	214.691	214.132	208.739	214.538	208.858	251.996	241.106	279.387	313.907	238.037	211.565	264.174	2417.16	3456.4	-0.516108	0.000204203	0.00187003	5154.19	3035.74	0.763709	3.62e-09	1.74e-08	5771.84	3201.88	0.849921	1.24e-18	1.02e-17	4812.52	1986.14	1.27698	6.83e-19	8.48e-18	5410.28	2088.51	1.37332	1.91e-31	3.52e-30	4802.88	4425.28	0.117973
Aco021180	18.02	21.9178	21.4478	27.6712	21.6976	26.708	183.398	180.034	176.076	166.17	160.711	171.202	34.2192	33.992	43.3607	213.108	124.238	137.749	209.052	231.432	157.213	1328.29	1074.62	0.306434	0.0493687	0.153335	8474.87	944.445	3.16576	1.5e-137	4.6e-135	8225.02	996.102	3.04575	8.57e-145	2.01e-142	7913.36	1091.47	2.85711	1.72e-106	3.79e-104	7709.62	1147.59	2.74692	9.74e-122	1.86e-119	6844.19	7277.4	-0.0885526
Aco007734	137.137	150.864	161.827	120.309	148.302	143.215	211.021	250.251	237.882	288.152	272.698	257.572	143.645	160.148	167.884	192.913	228.946	223.396	159.303	117.432	173.555	4124.66	4516	-0.130906	0.328036	0.552959	6297.22	3967.98	0.666319	4.12e-07	1.6e-06	7747.96	4185.28	0.888481	1.2e-15	8.25e-15	5879.79	3389.32	0.794904	4.77e-09	2.56e-08	7263.27	3563.97	1.0273	4.05e-19	3.96e-18	6448.19	5406.44	0.254187
Aco009341	107.507	104.196	110.909	111.105	109.334	119.622	163.945	157.718	172.124	196.174	173.88	173.438	154.067	155.573	179.778	279.341	261.734	270.465	208.238	165.245	170.164	3748.66	3566.54	0.071988	0.455208	0.670836	4897.01	3132.92	0.64439	2.8e-10	1.51e-09	5663.75	3304.22	0.777418	7.77e-15	5.07e-14	4572.52	3080.3	0.569805	1.93e-07	8.59e-07	5309.7	3238.86	0.712991	9.22e-13	5.93e-12	4714.11	4205.09	0.164832
Aco011631	46.3371	49.3314	29.9395	28.372	25.9152	31.9955	444.519	561.583	538.191	592.312	624.401	664.523	29.6269	32.6567	23.7815	190.43	131.238	129.708	256.937	480.968	353.576	692.496	1011.48	-0.54548	0.0141107	0.0594479	11149.3	888.856	3.64941	3.21e-61	1.95e-59	14281.2	936.915	3.93069	3.21e-90	2.6e-88	10410.1	568.978	4.19217	3.56e-184	3.03e-181	13384.9	598.272	4.48147	0	0	11881.5	9571.59	0.311797
Aco030299	172.635	220.67	201.609	243.921	193.257	222.804	509.955	579.099	561	558.695	609.149	527.965	219.83	231.062	237.131	472.52	455.449	488.219	666.739	571.503	630.032	3068.04	2772.69	0.14633	0.326943	0.551974	6900.71	2437.15	1.5017	1.29e-25	1.94e-24	7455.43	2570.3	1.53652	3.4e-30	4.97e-29	6443.33	2521.21	1.35346	1.1e-24	1.96e-23	6988.18	2650.79	1.39822	7.67e-32	1.44e-30	6203.18	5924.81	0.0662455
Aco005635	72.3998	73.8921	75.3994	79.9314	89.7806	85.329	80.9885	67.9948	74.3749	115.02	113.555	115.886	92.6244	102.436	113.097	89.1402	92.5521	89.7885	143.788	109.484	126.126	4914.44	4283.2	0.198169	0.0420338	0.136111	3871.55	3762.91	0.0409893	0.730721	0.805805	6275.5	3968.57	0.661049	3.33e-16	2.37e-15	3615.11	4038.56	-0.159769	0.198554	0.287963	5882.28	4246.48	0.470262	2.88e-07	1.12e-06	5221.91	3324.99	0.6513
Aco018929	0	0	0.0482402	0	0.345921	0	674.661	805.267	584.903	499.048	484.696	511.709	0.23116	0.273615	0.504932	874.946	380.873	450.588	668.483	624.435	560.491	2.04576	0.284219	2.60098	0.475541	1	10945.5	0.249436	15.1861	3.77e-37	9.92e-36	8336.72	0.264016	14.7166	1.65e-35	3.01e-34	10220.2	1.6838	12.6417	1.85e-20	2.57e-19	7814.32	1.7709	12.1813	5.56e-19	5.4e-18	6937.13	9397.36	-0.43788
Aco004160	153.963	173.519	180.037	160.262	157.498	164.615	244.408	238.099	249.228	343.913	346.448	292.873	160.454	171.435	150.196	276.783	221.544	220.201	275.21	273.916	285.756	3969.98	4187.53	-0.0769277	0.465422	0.678515	5417.5	3679.6	0.558079	1.25e-06	4.58e-06	7650.05	3880.99	0.979101	2.13e-15	1.44e-14	5058.53	3262.32	0.632763	3.34e-10	2.01e-09	7171.45	3430.2	1.064	7.23e-25	9.73e-24	6366.37	4652.01	0.45269
Aco024110	56.7666	15.7944	17.6569	38.225	60.6945	54.291	48.2865	40.7977	78.5995	110.93	88.9914	67.8043	118.538	107.986	133.498	130.14	79.3259	73.5644	238.545	169.797	256.59	2954.97	1749.82	0.75592	0.228288	0.440796	2910.61	1532.65	0.925309	0.163725	0.248566	4876.7	1615.31	1.59409	0.0104325	0.0205322	2717.61	2428.09	0.162817	0.517228	0.615462	4573.32	2553.37	0.841087	3.59e-05	0.000110388	4060.93	2499.38	0.700076
Aco021924	78.0263	89.0969	87.2939	153.965	176.185	153.326	170.19	188.406	182.808	186.016	191.861	180.601	125.662	141.367	135.785	151.523	162.419	135.915	161.561	171.94	164.868	5914.07	3119.62	0.922613	4.88e-15	5.5e-13	5955.97	2741.37	1.11953	9.74e-22	1.19e-20	6458.52	2891.22	1.15961	1.08e-29	1.53e-28	5561.23	4860.43	0.194557	0.10128	0.164328	6053.84	5110.56	0.244676	0.0151273	0.0301621	5374.03	5113.8	0.0715865
Aco017338	149.941	236.799	217.22	254.013	192.812	223.434	90.8391	96.5508	91.6071	59.6356	59.2226	51.5267	138.534	106.944	110.122	49.175	58.9984	56.524	85.0299	70.7091	74.6352	10015.2	9043.99	0.147206	0.454327	0.670027	3750.48	7952.81	-1.08437	2.6e-08	1.15e-07	2407.37	8388.11	-1.80077	8.87e-22	8.67e-21	3501.94	8230.26	-1.23287	4.83e-20	6.52e-19	2256.76	8653.12	-1.93886	1.72e-51	6.47e-50	2003.43	3220.3	-0.684454
Aco007159	102.991	121.578	117.757	137.525	148.284	148.656	203.635	231.535	207.808	242.65	267.255	234.329	168.839	184.075	168.577	213.738	198.443	209.408	162.146	166.614	185.353	4413.65	3486.11	0.340373	0.00251637	0.0150486	5874.29	3063.65	0.939211	2.2e-13	1.53e-12	7148.69	3231.13	1.14574	5.08e-22	5.03e-21	5484.98	3626.9	0.596774	1.29e-07	5.86e-07	6700.52	3813.62	0.813214	1.58e-16	1.33e-15	5947.77	5043.57	0.237961
Aco008829	220.173	228.803	227.397	292.683	307.282	288.497	177.16	162.861	128.653	211.442	219.697	198.171	188.46	195.891	209.12	197.321	211.451	199.559	242.517	185.161	170.345	7539.95	5755.5	0.389492	5.84e-06	8.97e-05	3576.59	5056.62	-0.499801	0.00127434	0.00311101	5049.26	5332.87	-0.0787189	0.390355	0.500757	3339.74	6196.43	-0.891904	8.87e-10	5.13e-09	4732.97	6515.24	-0.460838	4.64e-07	1.77e-06	4201.48	3071.55	0.452271
Aco017358	84.7001	97.9949	93.7233	89.9492	96.1331	89.0382	68.5248	65.4992	74.5034	78.533	74.6387	76.7055	94.9364	98.6082	98.7138	83.0683	79.6806	86.227	127.456	117.719	117.226	5476.26	5515.69	-0.0104534	0.921117	0.964605	3733.95	4847.11	-0.37627	0.00250209	0.00581313	4325.95	5111.95	-0.240814	0.0194115	0.036324	3486.51	4500.49	-0.368041	0.00137401	0.00348402	4055.07	4732.05	-0.222542	0.0129018	0.0260956	3599.95	3206.37	0.166883
Aco018669	123.372	88.2371	94.9711	89.3393	126.381	99.0559	67.0976	57.3263	74.4757	58.8047	62.2977	59.4008	189.607	164.383	164.258	80.9872	141.875	106.189	93.6082	77.1069	82.1577	5556.86	5429.67	0.0332513	0.863772	0.935676	3158.42	4766.29	-0.593601	0.00151252	0.00364649	3012.16	5026.09	-0.738667	1.61e-06	5.29e-06	2949.14	4566.91	-0.630644	0.000242544	0.000702472	2823.3	4802.18	-0.766022	7.14e-08	2.99e-07	2506.2	2712.39	-0.114213
Aco012956	44.4607	64.8405	61.5148	46.2264	43.8585	49.6021	89.3262	85.0593	88.2181	65.6632	76.7459	81.0572	42.1556	42.9408	42.3539	67.3557	59.4478	67.3844	63.5789	63.2823	56.5206	4172.35	5113.05	-0.293206	0.0791301	0.214348	7056.45	4495.37	0.650531	0.000206087	0.000567695	6314.32	4741.47	0.413278	0.0198471	0.0370486	6588.92	3428.4	0.942267	1.96e-18	2.35e-17	5917.3	3604.86	0.714695	6.6e-10	3.35e-09	5252.17	6059.53	-0.206381
Aco013128	178.644	253.004	293.604	748.241	515.017	477.582	25.2108	36.2076	61.6268	44.7091	47.0217	48.5452	120.384	126.624	122.325	182.523	159.625	220.526	55.5305	45.045	78.1186	16481.3	6881.08	1.2601	6.46e-08	1.73e-06	1048.87	6048.7	-2.52732	1.69e-14	1.29e-13	1256.24	6381.4	-2.34488	2.55e-34	4.42e-33	979.253	13547.9	-3.78996	3.26e-18	3.82e-17	1177.42	14242.2	-3.59657	3.92e-104	5e-102	1045.17	900.322	0.214321
Aco002134	170.826	183.462	185.393	269.904	286.852	257.227	412.824	468.549	442.265	450.942	451.583	408.413	166.53	194.096	175.935	264.621	250.744	287.524	342.452	264.409	303.841	5146.35	3420.87	0.588944	5.05e-09	1.79e-07	7526.3	3005.67	1.32429	3.7e-33	8.15e-32	7835.32	3169.99	1.30558	4.61e-40	1.02e-38	7027.47	4229.51	0.732729	1.21e-10	7.56e-10	7344.85	4447.08	0.724198	1.11e-13	7.69e-13	6520.29	6461.94	0.012993
Aco005530	177.111	184.767	197.079	177.306	171.95	196.846	84.4863	91.6708	62.8137	68.2026	69.6723	83.5126	186.864	177.232	164.019	143.607	135.999	139.428	117.418	94.1045	92.1326	7104.85	7291.94	-0.0373818	0.725384	0.858968	2795.52	6406.37	-1.19663	5.16e-12	3.22e-11	2724.48	6756.96	-1.31071	4.45e-25	5.15e-24	2610.34	5837.87	-1.16153	5.58e-13	4.3e-12	2553.36	6138.43	-1.26591	2.31e-26	3.35e-25	2266.59	2400.37	-0.082642
Aco007597	46.1594	66.3008	44.9535	75.7273	49.5974	75.2568	335.384	390.034	319.754	287.31	315.255	242.307	69.305	77.0511	78.3283	366.641	274.293	350.072	631.096	819.257	968.512	1330.66	1047.21	0.346531	0.1362	0.314661	6237.72	920.864	2.76052	3.95e-44	1.34e-42	5301.02	970.881	2.44956	2.47e-37	4.86e-36	5824.35	1093.29	2.41248	2.31e-40	8.55e-39	4969.13	1149.5	2.11107	1.03e-33	2.08e-32	4410.96	5355.53	-0.279769
Aco025464	49.1653	47.1218	58.9197	36.4301	39.9281	39.516	61.7145	60.1731	74.3691	59.5684	55.4557	59.3672	54.2316	54.8534	59.8095	42.5057	49.2172	54.3028	41.5803	46.6094	49.1668	4020.13	5398.71	-0.425546	0.00102445	0.00722974	6125.94	4741.99	0.369434	0.0186857	0.0364581	5720.23	5002.25	0.193324	0.12196	0.187153	5719.91	3303.54	0.792143	2e-09	1.11e-08	5362.02	3473.63	0.626371	2.27e-11	1.3e-10	4760.29	5260.21	-0.144241
Aco006524	114.278	76.5575	81.9103	90.1157	118.138	103.088	134.392	133.464	143.33	114.76	103.544	111.646	97.6622	87.7101	98.2863	70.7254	72.9283	69.3997	95.8919	77.847	93.6271	5726.47	5034.15	0.185805	0.342191	0.566899	6801.91	4418.43	0.622404	0.000787698	0.00198811	5736.34	4659.05	0.300053	0.0835486	0.134267	6351.16	4705.94	0.432739	0.00152606	0.00384287	5377.32	4948.38	0.120112	0.335163	0.446508	4774	5840.67	-0.291026
novel.545	61.5872	73.3432	71.3964	77.8167	80.7132	75.3383	116.827	109.369	113.268	90.4643	92.16	99.856	65.5755	69.8161	77.0247	125.966	104.946	111.322	138.809	125.144	116.769	4492.45	3972.95	0.177185	0.116779	0.28175	5865.57	3491.55	0.748434	1.1e-09	5.56e-09	5131.33	3682.46	0.478619	5.23e-05	0.000143738	5476.96	3692	0.569118	5.6e-08	2.67e-07	4809.41	3881.93	0.309163	0.00104096	0.00258086	4269.32	5036.99	-0.238634
Aco016987	26.0293	26.5745	29.5657	26.5005	30.6354	30.972	36.2806	29.4095	36.6461	29.2406	27.5043	35.1482	30.4718	28.8575	29.7151	32.6646	31.7783	34.2009	37.3148	34.5253	31.7571	5085.76	4755.16	0.0968667	0.417835	0.637498	5314.49	4177.42	0.347293	0.0161695	0.0319712	5016.16	4406.21	0.186834	0.172247	0.251985	4962.43	4179.01	0.247929	0.0781983	0.131547	4701.36	4394.29	0.0973021	0.449707	0.561185	4173.62	4564.27	-0.129243
Aco001481	42.7648	46.7993	49.2655	39.2514	41.2137	47.135	95.8548	86.8349	88.6742	108.43	94.6204	109.767	50.5972	59.524	65.0816	92.8732	81.4274	88.3862	117.32	107.879	100.979	3045.89	3322.51	-0.12521	0.315817	0.541382	5827	2919.31	0.997029	1.59e-17	1.49e-16	7060.2	3079.1	1.1971	1.24e-24	1.41e-23	5440.99	2502.62	1.12013	1.34e-19	1.74e-18	6618.24	2631.55	1.33019	1.25e-30	2.21e-29	5875.82	5004.05	0.231693
Aco011680	363.28	483.092	430.17	875.85	758.637	641.924	1513.83	1801.74	1250.2	1683.02	2093.56	1564.38	402.679	431.726	355.508	1336.28	948.574	835.547	576.142	596.082	706.449	4612.76	2592.79	0.831106	9.51e-07	1.86e-05	8318.44	2279.25	1.8678	6.47e-23	8.38e-22	10234.4	2403.73	2.09022	7.48e-36	1.38e-34	7767.27	3791.61	1.03465	2.85e-09	1.56e-08	9592.28	3986.23	1.26703	8.86e-17	7.6e-16	8513.77	7141.92	0.253593
Aco006661	257.581	261.423	263.42	319.349	303.771	300.538	154.56	187.746	170.118	195.311	189.743	198.397	210.908	205.743	219.292	193.865	214.419	208.943	175.078	165.463	153.472	7523	6390.62	0.235324	0.0047861	0.0254411	3753.69	5614.3	-0.580725	1.36e-06	4.96e-06	4493.49	5921.04	-0.398094	1.06e-06	3.54e-06	3504.87	6182.49	-0.81874	8.43e-12	5.89e-11	4211.94	6500.42	-0.626082	1.55e-13	1.06e-12	3739.14	3222.65	0.214334
Aco017899	5.89223	1.3211	0.630727	2.2845	2.58892	1.29833	97.2237	91.5265	93.5117	343.813	292.607	209.632	10.2916	16.6331	23.9317	185.929	91.0731	124.696	543.284	424.931	446.127	80.7327	103.317	-0.356996	0.622171	0.793309	3320.22	90.4293	5.19846	1.04e-08	4.8e-08	10452.9	95.2495	6.77805	2.87e-13	1.69e-12	3100.25	66.3834	5.56022	5.19e-151	2.91e-148	9802.16	69.7887	7.14658	3.55e-207	2.54e-204	8703.45	2851.19	1.61012
Aco013311	141.254	186.587	165.02	223.441	226.597	213.095	296.92	311.973	336.313	330.133	320.123	330.354	141.419	142.855	138.501	369.293	355.899	414.379	663.967	483.499	440.662	4083.67	3042.1	0.424836	0.00165418	0.0106527	5236.07	2674.19	0.969572	1.58e-10	8.75e-10	5709.64	2820.21	1.01773	2.66e-14	1.67e-13	4889.03	3356.07	0.543034	1.21e-06	4.89e-06	5351.97	3528.69	0.601137	2.85e-12	1.77e-11	4751.2	4495.86	0.0795307
Aco017520	40.4775	49.9969	54.5042	43.2653	40.5497	46.0054	123.296	125.036	99.1735	89.1112	96.0394	109.81	53.6966	52.0961	60.3791	171.598	138.534	144.655	244.177	233.024	190.499	2257.61	2527.13	-0.162557	0.271418	0.492432	5434.88	2220.96	1.29093	7.38e-14	5.34e-13	4852.25	2342.77	1.05028	2.71e-11	1.38e-10	5074.87	1855.07	1.45148	2.96e-26	5.88e-25	4547.35	1950.55	1.22061	3.84e-25	5.24e-24	4036.46	4666.93	-0.20936
Aco006460	27.0114	36.9966	40.8013	85.9896	97.2165	74.771	360.411	471.348	312.176	329.739	366.497	333.965	20.4019	28.1625	27.0528	202.319	137.83	114.019	152.786	140.863	115.091	3059.36	1245.23	1.29643	1.14e-11	7.15e-10	12193.6	1094.57	3.47759	2.67e-55	1.34e-53	11550.9	1154.68	3.32232	2.96e-84	2.11e-82	11385.6	2514.64	2.17904	1.51e-34	4.35e-33	10826.3	2643.94	2.03439	2e-61	9.92e-60	9609.97	10468	-0.123336
Aco000140	169.725	206.748	183.555	199.014	207.266	186.948	120.181	138.414	109.131	115.836	135.4	117.082	144.475	126.167	133.075	126.969	137.035	122.085	129.719	114.091	91.3721	7279.39	6888.78	0.079532	0.501052	0.707156	4057.29	6054.62	-0.577547	0.000127452	0.000362477	4273.71	6385.02	-0.579089	8.92e-06	2.69e-05	3788.44	5982.57	-0.659176	4.7e-07	2e-06	4005.52	6290.28	-0.650915	1.23e-09	6.06e-09	3555.34	3483.53	0.0296081
Aco011707	35.9624	36.0524	37.4579	38.416	44.026	38.9026	43.8825	36.6272	46.5348	32.9725	29.7435	37.6743	45.9845	42.3152	44.8841	40.6217	40.4046	41.7556	45.9622	47.3808	42.2118	5320.51	4812.64	0.144458	0.171096	0.366075	5011.5	4227.86	0.245365	0.0744237	0.125747	4162.04	4458.99	-0.0996349	0.422638	0.535106	4679.47	4372.55	0.0980761	0.482625	0.584276	3901.07	4597.59	-0.237007	0.0556316	0.0970018	3463.3	4303.9	-0.3137
Aco003856	39.2791	60.3928	57.0646	54.1617	76.8979	63.2195	108.728	106.125	139.146	91.8899	97.3296	96.2625	52.3331	56.3704	64.8531	124.561	108.274	100.568	158.519	146.981	135.534	3833.63	3097.9	0.307295	0.139427	0.31974	6283.57	2723.93	1.20599	1.54e-08	6.98e-08	5325.46	2873.1	0.890338	6.05e-07	2.07e-06	5867.05	3150.51	0.897355	2.75e-07	1.2e-06	4991.44	3312.86	0.591705	2.2e-05	6.95e-05	4430.8	5395.5	-0.284357
Aco020407	307.572	351.324	309.268	384.25	314.683	342.871	206.602	224.281	232.629	180.752	167.935	198.393	211.492	211.216	190.104	245.332	225.361	253.498	260.79	216.853	243.3	7234.06	6741.72	0.101839	0.414086	0.633969	4145.1	5924.58	-0.515113	2.78e-05	8.68e-05	3592.87	6247.63	-0.798255	3.43e-11	1.73e-10	3870.36	5944.93	-0.619165	8.92e-07	3.66e-06	3367.64	6250.45	-0.892475	2.91e-14	2.1e-13	2989.68	3559.02	-0.251788
Aco011823	145.625	96.6514	99.6789	116.398	107.798	107.323	160.032	164.435	212.424	161.582	179.675	164.714	154.246	166.533	175.903	212.884	197.908	208.893	154.125	149.585	146.644	3780.56	3914.64	-0.0502865	0.788136	0.894647	5509.39	3435.77	0.681321	0.00168492	0.00403279	5456.63	3622.71	0.590927	0.00115037	0.00264424	5144.15	3106.93	0.72761	7.74e-07	3.2e-06	5114.33	3266.67	0.646776	2.22e-11	1.27e-10	4539.72	4730.52	-0.0595602
Aco011589	77.6026	83.1703	86.5072	91.6991	89.7641	85.5208	110.178	100.093	104.949	103.372	109.701	102.501	79.1258	77.3389	78.521	103.228	95.2389	104.436	122.178	100.693	98.7582	4981.27	4625.73	0.106674	0.269655	0.490789	5290.56	4064.23	0.38038	0.000516545	0.00134061	5567.4	4286.57	0.377173	0.000108619	0.000286672	4940.07	4093.76	0.271165	0.0119999	0.0251226	5218.39	4304.28	0.278015	0.00181704	0.00433943	4632.28	4543.33	0.028053
Aco017871	138.265	131.164	141.673	239.902	219.314	195.343	114.421	106.527	205.534	88.1245	78.5037	80.6892	154.515	148.112	151.371	122.941	151.127	137.667	105.833	95.8617	137.236	8125.72	5118.15	0.666731	2.24e-08	6.9e-07	4766.53	4495.66	0.0845282	0.746859	0.816782	2902.5	4741.51	-0.708077	7.4e-13	4.24e-12	4450.4	6678.67	-0.585438	0.0122484	0.025575	2720.98	7021.76	-1.36756	3.45e-33	6.84e-32	2415.74	4092.76	-0.760793
Aco017802	127.798	146.129	135.303	182.908	206.889	182.602	236.716	233.156	203.701	257.436	252.246	243.297	134.644	150.258	149.951	249.183	256.707	264.037	348.766	254.727	230.536	4854.28	3479.1	0.480416	2.67e-05	0.000332799	5136.75	3057.34	0.74856	2.88e-09	1.4e-08	6036.67	3224.25	0.904968	1.57e-19	1.35e-18	4796.47	3989.42	0.265872	0.0322828	0.0605519	5658.7	4194.72	0.432247	1.09e-05	3.6e-05	5023.5	4411.01	0.187779
Aco022698	11.2694	13.0131	14.1546	18.5767	13.2987	14.2136	397.376	394.91	402.413	407.429	463.174	428.853	10.6134	13.1609	12.9097	92.147	55.3115	78.7894	329.232	310.921	246.929	507.354	424.244	0.258232	0.189798	0.391564	11833	372.796	4.98775	0	0	13531.2	393.228	5.10424	0	0	11048.9	416.984	4.72711	2.55e-222	3.63e-219	12682	438.384	4.85366	1.19e-269	1.26e-266	11256.9	10160.8	0.147784
Aco023353	24.4072	28.9005	30.6393	38.1302	37.2727	38.6229	89.5414	81.7277	102.32	74.0879	67.0601	82.7586	31.0043	33.304	38.2446	95.2234	69.1856	76.2491	102.708	101.161	85.8066	3291.63	2429.17	0.438303	0.000396785	0.00326439	7106.41	2134.72	1.73509	1.39e-28	2.45e-27	6112.46	2251.67	1.44062	5.84e-24	6.4e-23	6635.47	2704.93	1.29465	2.74e-24	4.81e-23	5729.29	2844.11	1.01017	3e-20	3.15e-19	5086.36	6102.49	-0.262939
Aco022109	172.719	97.0116	91.7598	132.659	147.624	127.736	120.018	112.712	144.268	149.765	131.591	184.914	159.387	170.401	193.95	263.392	347.249	226.537	238.85	260.357	271.125	4019.53	3576.24	0.168537	0.499614	0.706356	3341.35	3137.48	0.0908851	0.733891	0.808071	4343.77	3307.57	0.393115	0.127012	0.193856	3119.9	3303.49	-0.0820964	0.56688	0.660522	4071.21	3473.45	0.229095	0.110977	0.177291	3614.37	2869.23	0.332753
Aco029046	160.848	175.73	170.825	213.47	227.361	212.997	244.608	295.08	254.062	304.459	295.611	276.239	197.126	216.33	205.143	233.487	238.253	226.56	221.126	207.689	205.706	5128.55	3990.32	0.361926	0.000133039	0.00129545	5598.8	3506.18	0.675256	9.6e-08	3.99e-07	6497.95	3697.73	0.813479	2.53e-17	1.93e-16	5227.71	4214.69	0.31086	0.0107334	0.0227461	6091.31	4431.56	0.459206	5.61e-07	2.13e-06	5407.61	4806.77	0.16997
Aco006873	245.906	306.894	317.895	383.021	323.55	348.151	204.218	244.193	177.837	156.856	145.473	154.396	313.774	292.229	334.206	112.568	131.934	116.769	144.168	144.55	138.961	8043.2	6655.97	0.273152	0.0533225	0.162244	4294.56	5849.84	-0.445967	0.0121351	0.0246719	3293.51	6170.31	-0.905755	1.9e-11	9.81e-11	4009.99	6609.85	-0.721169	1.36e-06	5.47e-06	3087.3	6949.6	-1.17072	3.04e-30	5.31e-29	2740.85	3687.12	-0.427768
Aco023527	99.3252	106.067	99.3744	124.195	135.508	127.72	90.6721	99.763	97.7495	102.274	115.002	107.663	185.99	167.759	173.314	135.002	164.798	143.87	131.084	134.384	130.496	5274.96	4160.62	0.342306	0.000351613	0.00294738	3529.04	3655.7	-0.0506818	0.6347	0.730013	4183.6	3855.19	0.118036	0.244649	0.340293	3295.14	4334.93	-0.395456	0.000344163	0.000973103	3921.06	4558.04	-0.217009	0.0267588	0.0504102	3480.47	3030.05	0.199855
Aco008631	71.8301	89.4805	74.6716	126.916	104.216	123.307	385.604	436.395	426.768	313.194	279.622	279.202	105.592	116.407	120.617	231.366	186.987	241.567	357.932	349.184	364.629	2865.45	1912.97	0.583481	6.01e-05	0.000666811	9082.38	1681.46	2.43369	4.44e-66	3.14e-64	6665.6	1773.1	1.91083	1.09e-48	3.11e-47	8480.39	2354.61	1.84832	7.07e-48	3.48e-46	6248.86	2475.69	1.33535	1.02e-31	1.91e-30	5547.88	7797.95	-0.491171
Aco003790	6.26081	28.1664	5.75432	297.182	337.854	195.822	1150.93	1296.28	724.96	638.36	752.197	763.821	166.536	228.401	264.152	540.071	443.572	383.796	678.812	535.237	444.202	3368.31	163.001	4.36998	1.03e-08	3.42e-07	11556.4	143.784	6.32949	2.3e-14	1.73e-13	8258.86	151.463	5.76996	6.22e-15	4.08e-14	10791	2769.3	1.96246	4.13e-16	4.09e-15	7739.7	2911.47	1.41096	2.47e-14	1.79e-13	6869.69	9922.69	-0.530435
Aco000662	132.357	111.366	108.273	105.266	97.8416	110.082	178.085	202.278	175.587	232.571	237.532	191.774	140.347	145.828	154.473	169.106	180.715	199.093	199.154	172.848	247.023	3329.06	3754.18	-0.173154	0.18637	0.386774	5315.07	3296.78	0.689028	9.24e-07	3.43e-06	6651.36	3476.4	0.936152	3.5e-11	1.77e-10	4962.83	2735.52	0.859082	4.45e-13	3.47e-12	6235.31	2876.29	1.11613	1.62e-21	1.84e-20	5535.27	4563.45	0.278665
Aco007607	9.25443	8.49516	11.9386	13.1976	13.4021	11.5502	467.474	497.524	297.866	299.829	392.156	450.544	17.5462	18.2808	20.8602	373.02	194.652	201.742	812.107	724.583	473.364	284.481	221.945	0.355135	0.0963494	0.245294	8465.13	194.923	5.43907	1.44e-113	2.83e-111	8061.14	205.647	5.29077	1.42e-149	3.76e-147	7904.53	233.815	5.08042	1.95e-141	9.04e-139	7552.88	245.834	4.94299	2.44e-197	1.42e-194	6703.23	7268.86	-0.11684
Aco006949	121.54	134.071	138.223	137.349	148.009	134.473	84.7772	84.313	85.8438	103.822	101.144	109.598	102.163	106.064	106.049	76.6222	88.257	87.0133	89.7875	92.6714	89.4411	6809.37	6403.58	0.0884748	0.397132	0.619264	3719.09	5626.63	-0.597308	2.48e-08	1.1e-07	4824.1	5934.47	-0.298965	0.00374823	0.00795084	3472.66	5596.15	-0.688223	8.9e-11	5.64e-10	4521.71	5884.07	-0.379862	5.34e-05	0.000160385	4014.1	3193.53	0.329803
Aco003160	188.704	182.061	196.161	244.641	263.302	232.915	166.991	194.515	182.077	255.212	238.348	217.357	189.665	211.763	204.516	177.778	188.463	203.263	198.694	163.711	188.714	6287.55	4824.55	0.381823	0.00018305	0.00171284	4148.87	4237.93	-0.030629	0.78782	0.844431	5702.84	4469.71	0.35154	0.000788414	0.00186058	3873.87	5167.45	-0.415459	0.000537742	0.00146934	5346.31	5433.27	-0.022972	0.828508	0.877868	4746.44	3562.05	0.414154
Aco018422	39.4724	53.5531	43.4978	41.8964	35.5029	49.6082	154.491	148.799	170.008	172.759	170.493	174.604	74.4728	87.835	88.1355	121.788	110.268	124.228	202.223	182.683	212.633	1946.08	2097.3	-0.107281	0.554971	0.748158	6525.93	1843.84	1.82376	1.98e-29	3.65e-28	7504.57	1944.35	1.94878	5.86e-43	1.41e-41	6093.47	1598.81	1.92958	3.16e-37	1.03e-35	7034.33	1681.15	2.06398	5.27e-56	2.21e-54	6244.62	5603.81	0.156091
Aco016885	223.018	265.142	254.298	325.174	314.934	327.708	266.265	331.228	258.851	286.619	304.949	275.865	242.146	253.625	252.605	240.957	257.473	245.076	265.443	259.066	256.913	6194.38	4763.96	0.378887	0.000423106	0.00344471	4928.6	4186.73	0.235348	0.12676	0.199713	5249.74	4415.57	0.249752	0.0297956	0.0536396	4601.95	5090.29	-0.145581	0.272556	0.371655	4920.74	5352.18	-0.121225	0.171071	0.256664	4368.07	4231.29	0.0459958
Aco004805	11.9786	18.8929	18.9533	16.826	19.3852	23.0771	131.536	138.116	101.373	96.6824	92.3624	86.7675	17.2483	16.9314	21.0955	103.65	73.3484	145.605	137.61	195.365	187.022	1358.53	1143.78	0.248469	0.261044	0.480936	7644.3	1005.71	2.92615	2.03e-38	5.63e-37	5974.66	1060.88	2.49365	1.94e-38	3.97e-37	7137.95	1116.11	2.67655	1.26e-55	8.31e-54	5600.86	1173.67	2.25402	5.89e-64	3.14e-62	4972.29	6563.98	-0.400501
Aco021103	41.0153	46.5869	42.6981	57.4541	57.0735	59.2832	71.8781	59.3549	67.6175	72.6797	63.1319	75.1302	47.7407	48.8056	50.6075	93.1725	86.137	83.905	108.533	101.79	108.495	4428.23	3328.5	0.412076	3.16e-05	0.000382614	4557.96	2924.98	0.640038	1.87e-06	6.73e-06	5081.48	3084.61	0.720184	1.99e-09	8.58e-09	4256.04	3638.9	0.225941	0.0630888	0.109359	4763.33	3826.16	0.315897	0.0023562	0.00550601	4228.99	3914.53	0.111423
Aco002495	374.559	504.82	403.544	635.975	704.737	665.455	350.709	469.964	271.887	414.921	415.911	389.667	316.741	346.614	301.794	242.177	251.638	232.652	405.331	349.036	322.459	8710.34	5582.98	0.64176	9.37e-06	0.000135504	4263.51	4908.26	-0.203199	0.380649	0.50027	5009.73	5175.69	-0.0468643	0.744421	0.806573	3980.99	7158.03	-0.84653	7.6e-06	2.75e-05	4696.02	7526.49	-0.680352	1.3e-13	8.95e-13	4168.8	3660.08	0.187917
Aco009579	67.232	97.462	94.6125	56.1815	56.7465	49.9951	117.979	124.503	212.6	85.1766	96.1156	80.3068	156.549	139.341	137.349	275.443	269.886	263.948	176.425	194.494	187.028	2012	3208.65	-0.673533	9.47e-05	0.000970588	5058.51	2820.96	0.84265	0.00186438	0.00442347	3054.54	2975.47	0.0379416	0.828877	0.874766	4722.98	1653.63	1.51436	5.73e-12	4.06e-11	2863.05	1738.64	0.720215	1.07e-09	5.32e-09	2541.36	4343.1	-0.773266
Aco014223	123.247	138.286	173.395	98.9287	86.0001	98.0148	75.078	85.2666	93.1043	76.2934	71.119	78.5967	216.364	243.305	262.827	210.592	233.607	271.767	183.012	151.479	167.925	3155.84	4862.88	-0.623731	8.94e-05	0.000928615	2543.38	4272.64	-0.748302	2.52e-05	7.93e-05	2383.88	4507.56	-0.919216	3.51e-09	1.49e-08	2374.78	2593.25	-0.126918	0.35054	0.454458	2234.54	2726.63	-0.287646	0.0071911	0.0153758	1983.77	2183.67	-0.138958
Aco014067	151.694	194.769	158.248	211.287	202.284	170.523	133.555	125.52	118.35	114.241	112.749	117.63	181.722	183.858	177.207	149.313	160.995	155.647	226.531	190.839	172.703	6132.8	5312.29	0.207198	0.170201	0.364636	3564.26	4669.75	-0.389716	0.00913653	0.0190566	3421.38	4924.18	-0.525211	8.11e-05	0.000217334	3328.15	5040.81	-0.598892	5.99e-06	2.2e-05	3206.96	5299.78	-0.724572	1.69e-10	9.01e-10	2846.92	3060.8	-0.104383
Aco007190	340.459	368.851	362.178	435.054	462.806	410.84	780.682	1011.73	995.697	939.018	988.801	860.07	436.539	456.009	474.594	837.3	773.355	828.917	914.535	869.899	1016.44	3347.44	2747.76	0.284488	0.00629411	0.0315685	6413.94	2414.33	1.40971	2.3e-21	2.75e-20	6741.56	2546.24	1.40485	3.06e-41	6.95e-40	5988.66	2751.11	1.12251	3.09e-15	2.87e-14	6319.31	2892.62	1.12784	1.82e-27	2.81e-26	5609.63	5506.17	0.0267959
Aco001928	212.456	225.382	227.513	295.839	322.285	295.522	99.4418	132.393	107.744	150.346	144.095	116.082	642.535	674.381	611.373	214.728	266.714	202.358	172.773	167.174	174.572	5770.51	4213.19	0.453587	2.59e-06	4.41e-05	1928.45	3701.73	-0.940724	3.46e-10	1.85e-09	2450.5	3904.08	-0.671599	4.28e-07	1.49e-06	1800.6	4742.31	-1.39698	1.5e-22	2.4e-21	2297.41	4986.34	-1.11751	3.55e-19	3.48e-18	2039.61	1655.49	0.301227
Aco014727	211.677	226.688	153.788	49.4722	98.7131	83.5964	191.957	140.768	195.437	80.8338	110.744	72.2619	137.033	86.8554	88.1034	274.115	337.562	318.198	481.594	333.435	347.569	2077.37	5320.98	-1.35706	2.85e-07	6.53e-06	4257.72	4675.8	-0.13502	0.527798	0.642107	2235.06	4929.19	-1.1408	9.12e-08	3.38e-07	3975.69	1706.92	1.22005	3.65e-07	1.57e-06	2094.74	1795.1	0.223062	0.348337	0.460103	1859.06	3656.96	-0.97588
Aco008726	47.3706	45.1564	47.7426	86.2848	89.927	69.8656	185.753	212.075	176.132	158.516	177.358	163.114	46.8939	47.1372	48.342	152.911	112.556	111.468	200.35	180.966	166.784	3695.99	2112.6	0.806515	4.29e-09	1.56e-07	7751.46	1855.69	2.06239	2.84e-64	1.92e-62	7086.5	1957.12	1.85622	4.03e-78	2.51e-76	7237.79	3038.01	1.25272	6.83e-18	7.82e-17	6641.9	3194.11	1.05662	3.2e-17	2.83e-16	5895.62	6655.31	-0.174796
Aco005578	198.995	214.538	205.042	232.04	268.163	226.839	547.925	573.95	711.07	699.661	850.036	506.54	188.231	238.504	166	388.497	361.927	415.964	481.584	462.904	729.191	3137.81	2676.47	0.229068	0.0513982	0.157821	7116.53	2351.69	1.59764	5.98e-27	9.63e-26	8387.82	2480.1	1.758	4.7e-20	4.13e-19	6644.75	2578.85	1.36587	4.01e-20	5.46e-19	7862.8	2711.55	1.53621	2.54e-18	2.37e-17	6979	6110.38	0.191768
Aco004758	114.808	176.505	137.979	277.361	241.765	202.027	536.912	522.22	555.584	501.596	547.676	604.767	131.763	170.375	153.377	277.287	276.702	289.794	433.493	421.604	488.575	3854.26	2299.35	0.745285	0.000169891	0.00160501	7763.61	2022.04	1.94114	8.4e-26	1.27e-24	8361.77	2132.28	1.97159	1.34e-27	1.74e-26	7249.17	3168.16	1.19438	1.44e-16	1.47e-15	7836.41	3330.78	1.23448	9.62e-19	9.19e-18	6955.95	6666.61	0.0611832
Aco016028	23.9417	11.4649	10.3016	19.6795	19.3032	17.4681	191.805	233.511	173.535	165.661	181.92	223.108	20.4737	21.6318	28.4593	75.8315	67.1199	52.4559	221.417	341.861	195.86	950.705	773.497	0.297572	0.3433	0.568095	9068.06	678.327	3.74076	6.41e-32	1.33e-30	9092	714.999	3.66858	2.19e-34	3.81e-33	8467.14	781.36	3.43826	9.19e-121	2.64e-118	8520.07	821.528	3.37494	2.85e-135	6.51e-133	7562.68	7785.29	-0.0418891
Aco000299	269.47	370.301	408.447	377.87	279.432	367.919	608.999	746.893	697.927	743.923	931.991	571.004	391.443	418.39	372.535	468.471	381.589	464.529	486.199	377.263	459.506	3696.8	3788.47	-0.0351908	0.85819	0.932367	6662.68	3330.12	1.00052	1.95e-07	7.83e-07	7661.97	3513	1.12504	3.83e-07	1.33e-06	6221.01	3037.59	1.03396	2.8e-11	1.86e-10	7182	3193.76	1.16899	1.46e-10	7.83e-10	6374.51	5720.03	0.156355
Aco011953	69.9677	81.3733	84.4553	98.8219	111.5	98.3957	126.569	127.736	128.477	123.307	115.766	129.965	84.7145	90.3317	94.5203	127.84	129.994	136.467	159.269	147.6	140.118	4659.12	3566.85	0.385175	0.00206652	0.0128079	5195.72	3134.41	0.72912	2.45e-09	1.2e-08	5265.74	3306.01	0.671446	2.91e-08	1.13e-07	4851.43	3829.04	0.341693	0.0023092	0.00561921	4935.78	4026.08	0.294094	0.00488283	0.0107612	4381.81	4461.44	-0.0260989
Aco003796	208.502	206.751	207.264	243.705	230.91	239.432	208.832	227.36	188.594	336.476	323.232	279.579	197.763	225.295	225.828	250.001	254.873	248.106	250.028	217.512	230.128	5132	4487.11	0.193828	0.0210193	0.081035	4038.42	3941.84	0.0348001	0.768298	0.830657	6381.78	4157.13	0.618497	1.38e-08	5.53e-08	3770.84	4217.34	-0.161618	0.171927	0.255576	5982.8	4434.27	0.4322	3.48e-05	0.000107311	5311.4	3467.51	0.615406
Aco002679	88.1834	79.9347	71.4338	97.5325	111.968	106.14	164.755	163.004	146.097	236.754	220.584	224.772	125.307	142.739	141.104	150.333	143.901	143.931	214.065	163.892	200.842	3678.74	2800.56	0.393508	0.00301099	0.0174216	4966.52	2459.81	1.01372	1.08e-13	7.72e-13	7515.27	2593.69	1.53497	5.58e-39	1.17e-37	4637.49	3023.07	0.617372	2.48e-07	1.09e-06	7044.9	3178.73	1.14836	9.64e-32	1.8e-30	6254.35	4264.79	0.552537
novel.110	6.29781	8.94459	4.83845	40.9732	12.8565	20.2973	619.483	668.314	366.577	688.882	744.769	551.274	3.0226	5.27541	16.0788	87.8933	83.6541	63.0196	90.1312	129.261	65.7029	709.615	192.902	1.88052	4.55e-06	7.22e-05	14248.2	169.644	6.39417	6.09e-105	1.08e-102	17978.3	178.815	6.65496	8.46e-191	3.6e-188	13304.7	583.317	4.51131	1.54e-16	1.57e-15	16853.4	613.098	4.78056	2.74e-21	3.05e-20	14960.6	12234.6	0.290275
Aco000081	204.373	238.701	214.493	179.755	189.469	164.497	110.61	101.592	109.147	105.994	109.407	108.551	172.115	170.823	159.972	107.777	114.713	112.656	91.5975	94.9867	94.1289	6276.29	7752.02	-0.304774	0.00872736	0.0411213	3399.18	6812.69	-1.00297	1.1e-16	9.74e-16	3601.97	7184.42	-0.996031	3.88e-21	3.64e-20	3173.98	5158.35	-0.700434	2.46e-09	1.36e-08	3376.15	5423.62	-0.683643	3.32e-12	2.04e-11	2997.01	2919.05	0.0380131
Aco008439	22.9226	20.7607	24.611	20.8603	20.1944	23.2901	29.5823	24.3426	35.0159	24.8117	19.344	26.0463	25.1946	23.9949	25.3845	23.5604	22.1947	26.4666	23.7174	27.3159	26.3899	4457.39	4744.85	-0.0900873	0.459398	0.674094	5545.08	4167.24	0.412135	0.0188645	0.0367665	4598.29	4395.52	0.0648787	0.668588	0.751884	5177.63	3662.49	0.499447	0.00170352	0.00425321	4310.58	3851.06	0.162337	0.231889	0.330503	3827.32	4762.08	-0.315434
Aco000863	65.8369	76.4419	54.3423	97.5498	104.095	67.4018	246.222	259.526	425.166	200.447	216.711	172.5	68.4095	70.51	98.2336	343.548	247.164	255.564	686.652	553.279	612.354	2022.42	1481.9	0.448466	0.035273	0.120026	6297.27	1302.44	2.2738	3.65e-19	3.82e-18	4189.66	1373.14	1.6099	6.16e-22	6.06e-21	5879.6	1662.64	1.82272	1.13e-14	1.01e-13	3927.34	1748	1.16862	1.23e-11	7.19e-11	3486.23	5406.71	-0.633171
Aco015917	53.6644	52.5761	69.2125	38.9226	38.2342	48.6113	92.3791	86.4245	118.642	81.8708	70.6431	83.0829	80.8824	85.97	99.3626	84.1226	82.4587	86.9232	108.04	89.7247	109.892	2720.68	3805.55	-0.483978	0.00403957	0.0221375	5790.86	3342.71	0.792734	2.94e-05	9.15e-05	4819.2	3526.46	0.450351	0.00304487	0.00656971	5407.02	2235.24	1.27421	2.86e-14	2.45e-13	4517.54	2350.41	0.942063	7.4e-13	4.79e-12	4010.81	4972.59	-0.310305
Aco002079	115.401	145.199	145.042	149.772	162.633	148.293	180.975	202.618	185.55	159.268	175.386	170.648	114.103	107.083	100.453	139.932	116.688	124.344	174.412	169.258	140.446	5342.05	4714.11	0.180294	0.173988	0.369949	5935.03	4143.31	0.518487	0.000323771	0.000868481	5540.63	4370.12	0.342373	0.0105187	0.0206823	5541.7	4390.23	0.336202	0.00274092	0.00657734	5192.92	4616.12	0.170058	0.0777477	0.130295	4609.49	5095.8	-0.144727
Aco005242	41.2067	52.1614	62.2333	65.839	72.441	71.6106	183.113	186.504	131.235	178.783	203.837	223.131	81.0624	88.7652	72.4782	171.065	134.488	143.862	175.858	161.636	149.77	2933.43	2179.13	0.428638	0.012447	0.0539265	6293.46	1915.11	1.71626	1.32e-15	1.09e-14	8007.65	2020.41	1.98656	2.37e-28	3.17e-27	5876.64	2410.54	1.28554	8.37e-16	8.1e-15	7504.19	2534.66	1.56589	1.92e-41	5.19e-40	6660.81	5404.25	0.301693
Aco013087	14.8243	2.4828	1.8267	6.61264	7.95179	4.26852	315.226	313.883	345.93	278.543	331.267	286.876	30.2759	22.4486	27.8366	113.109	85.1886	59.0843	248.012	240.471	231.472	249.326	255.116	-0.0333514	0.971671	0.988405	11608.4	223.19	5.70074	2.52e-09	1.24e-08	11222.4	235.109	5.57689	5.84e-09	2.43e-08	10839.1	204.995	5.73013	1.41e-178	1.16e-175	10518	215.52	5.61512	2.38e-192	1.35e-189	9335.69	9967.82	-0.0945383
Aco001241	229.767	221.968	222.926	238.98	278.572	190.961	243.766	278.015	291.778	280.953	331.944	249.372	314.217	308.662	298.187	222.536	236.988	255.52	189.147	197.407	240.39	4735.89	4521.59	0.0664953	0.680006	0.82979	4890.55	3971.9	0.300315	0.012684	0.025679	5448.27	4188.78	0.379382	0.00503278	0.0104408	4566.35	3893.04	0.230522	0.16429	0.246232	5106.76	4093.12	0.319596	0.0491862	0.0869885	4532.8	4198.87	0.110407
Aco012554	101.52	109.365	118.859	106.198	100.169	116.352	52.6414	49.6151	46.8509	38.2664	37.0984	43.042	154.235	152.407	147.291	93.5999	109.655	98.884	79.2515	81.1474	75.6331	5753.9	5894.79	-0.0347748	0.765385	0.881663	2391.43	5179.2	-1.11509	5.65e-20	6.17e-19	1996.67	5462.86	-1.4524	4.07e-33	6.71e-32	2233.01	4727.83	-1.08256	1.12e-19	1.47e-18	1871.43	4971.21	-1.40999	7.72e-37	1.78e-35	1661.34	2053.63	-0.305914
Aco000660	66.4279	71.4317	73.1071	90.7817	96.475	89.9595	64.4796	57.7412	64.7219	58.4161	49.0016	60.2705	55.3658	55.7367	50.7273	56.4972	51.8679	48.0216	57.4452	64.542	57.6767	7306.96	5575.01	0.390148	3.87e-05	0.000458787	4432.69	4898.35	-0.144089	0.208548	0.305377	4178.75	5166.23	-0.306164	0.0128605	0.0248975	4139.01	6004.96	-0.536747	1.91e-06	7.54e-06	3917.2	6313.94	-0.688763	9.11e-10	4.56e-09	3477.87	3806.64	-0.130452
Aco006268	0.532345	0.512109	0.400319	0.403082	0.127583	0.627605	146.402	196.408	425.823	298.336	233.918	244.557	0.799279	1.10726	1.28033	93.6349	45.6197	63.6885	44.1182	148.895	108.438	22.1967	27.8025	-0.310628	0.636723	0.802964	13276.6	24.424	9.08909	3.41e-116	7.27e-114	14083.1	25.7503	9.10196	0	0	12395.2	18.2228	9.39879	3.97e-40	1.45e-38	13204.4	19.1628	9.40983	1.17e-70	7.35e-69	11724.6	11396.7	0.0409025
Aco012680	19.4886	29.4834	33.0188	58.0185	33.1642	54.5794	157.928	159.318	205.621	113.57	115.776	112.571	64.9868	73.5539	77.0527	157.971	119.341	142.131	277.584	218.045	225.689	2186.01	1232.49	0.826952	0.00179486	0.0113879	7059.33	1083.55	2.70373	7.56e-32	1.57e-30	4851.02	1143.13	2.08519	5.41e-26	6.54e-25	6591.36	1796.08	1.87531	1.04e-18	1.27e-17	4547.03	1888.36	1.26717	6.92e-12	4.15e-11	4036.46	6061.45	-0.58671
novel.32	0.182246	0.779864	0.67001	3.61292	5.9838	2.01636	129.364	129.611	188.404	103.012	135.654	125.235	1.18573	3.12369	3.86513	235.118	145.374	186.198	248.877	187.676	178.423	217.071	30.4981	2.83063	4.2e-07	9.18e-06	7519.72	26.8582	8.13192	1.09e-99	1.69e-97	6429.42	28.3348	7.82746	1.1e-46	2.93e-45	7021.14	178.519	5.29975	2.45e-29	5.65e-28	6024.84	187.689	5.00694	2.87e-29	4.83e-28	5347.11	6456.68	-0.272167
Aco018470	18.6936	19.683	21.3247	20.2108	22.1712	25.0004	19.5224	15.4989	18.8293	13.6233	11.0196	17.8394	21.7201	19.8266	18.9263	16.5553	17.3528	19.1507	17.7054	18.1183	16.6555	6054.44	5378.27	0.170908	0.175649	0.37259	4353.42	4725.17	-0.118247	0.411229	0.531303	3610.29	4983.87	-0.46536	0.0134182	0.0258813	4065.06	4974.52	-0.291362	0.044654	0.0806733	3383.72	5230.87	-0.628715	0.00026912	0.000727813	3004.16	3738.97	-0.315887
Aco015622	73.7904	104.359	95.8899	150.619	148.329	151.421	187.676	235.616	189.672	224.477	239.658	211.377	91.91	90.3122	87.379	128.677	123.102	116.954	213.546	190.094	195.517	5065.19	3088.74	0.713676	2.53e-06	4.34e-05	6199.25	2715.5	1.19093	1.02e-10	5.72e-10	7183.52	2864	1.32677	3.01e-17	2.3e-16	5788.36	4162.41	0.475702	0.000248588	0.000718803	6733.41	4376.57	0.621595	1.01e-11	5.96e-11	5977.14	5322.1	0.167523
Aco012018	201.96	230.262	207.012	223.482	236.962	250.257	134.37	174.972	134.494	146.036	116.263	123.387	172.8	173.904	150.688	72.5619	71.1686	64.7237	79.2374	77.4317	78.2019	7918.78	7141.21	0.149227	0.164202	0.356263	4446.59	6275.56	-0.497031	0.00156687	0.00376725	4061.69	6617.91	-0.704191	5.8e-08	2.19e-07	4151.86	6506.91	-0.648271	5.61e-06	2.07e-05	3808.16	6841.98	-0.8453	5.03e-13	3.3e-12	3381.32	3817.31	-0.17491
Aco009949	15.515	20.0208	17.6139	19.3909	25.7957	25.6322	172.487	165.593	117.135	193.891	234.682	266.938	65.0882	70.9608	81.353	154.652	154.377	125.485	222.176	241.343	177.66	1027.04	772.499	0.411046	0.0225309	0.0855343	5934.88	679.042	3.12783	7.57e-56	3.87e-54	9540.97	716.11	3.7362	3.94e-109	4.87e-107	5541.87	843.882	2.71526	6.62e-48	3.27e-46	8940.25	887.399	3.33277	1.16e-98	1.32e-96	7935.04	5096.67	0.638774
Aco017987	109.939	116.796	122.036	141.492	135.732	140.584	151.034	158.836	144.685	140.036	148.473	96.9189	133.594	136.168	100.387	152.669	165.876	147.455	151.268	141.257	129.573	5139.99	4302.19	0.256702	0.00548281	0.0283478	5029.69	3779.88	0.412034	0.000110086	0.000316804	4481.74	3986.67	0.169015	0.339744	0.447334	4696.41	4223.88	0.15288	0.138909	0.214004	4201.74	4441.17	-0.0797789	0.610201	0.700807	3729.95	4318.75	-0.211236
Aco002173	28.5491	28.9277	29.8939	27.3411	31.1963	31.043	97.4472	88.3292	122.917	105.885	98.0866	92.6948	35.8266	38.9639	40.0559	107.337	88.4593	101.998	120.219	140.842	129.281	2049.85	2004.64	0.0320143	0.772642	0.885733	6356.07	1761.1	1.85174	9.82e-30	1.84e-28	6416.84	1857.37	1.78861	2.57e-73	1.44e-71	5934.79	1684.42	1.81711	6.88e-31	1.73e-29	6015.59	1771.18	1.76418	7.87e-61	3.82e-59	5340.63	5458.08	-0.0314764
Aco007145	49.5128	59.1232	53.9607	63.9352	81.9457	84.8303	85.9498	87.3391	92.071	65.2334	61.9135	74.9975	158.323	168.031	146.039	156.792	133.458	129.489	240.05	289.045	251.709	3159.59	2232.07	0.501455	0.00122978	0.00838037	3268.65	1961.68	0.736875	3.44e-09	1.66e-08	2617.71	2068.78	0.339445	0.0114949	0.0224522	3052.04	2596.06	0.233509	0.107074	0.172182	2453.5	2729.93	-0.154214	0.281129	0.387065	2178.09	2806.67	-0.366176
Aco017026	83.9868	56.819	74.9892	32.5725	43.549	45.5216	38.7538	36.6142	39.9835	27.1684	26.0055	30.3165	141.131	127.587	158.889	57.5238	83.0308	66.0385	54.9625	62.476	62.0863	3031.08	5394.69	-0.83176	3.29e-05	0.000396896	2585.34	4734.94	-0.873043	7.8e-07	2.93e-06	1967.06	4994.07	-1.34442	3.51e-15	2.33e-14	2414.03	2490.39	-0.0448944	0.775303	0.836312	1843.7	2618.86	-0.506528	0.0007402	0.00187783	1636.74	2220.09	-0.440177
Aco014334	18.6781	20.7304	23.2708	25.1884	25.7221	26.494	42.6639	38.4888	43.8421	35.0139	28.7338	35.9362	21.8857	21.9283	23.2028	41.7248	34.9175	39.0391	42.3625	40.8924	36.1328	4154.86	3372.72	0.300785	0.012309	0.0534298	6036.15	2963.43	1.0263	1.05e-13	7.49e-13	5058.95	3125.91	0.694407	1.59e-06	5.22e-06	5636.22	3414.23	0.723175	1.05e-10	6.57e-10	4742.38	3589.96	0.401497	0.0005237	0.00135781	4210.58	5183.58	-0.300058
Aco010310	36.7723	31.1903	28.5172	31.4257	50.3085	34.0491	146.006	139.045	141.951	194.561	187.936	197.184	25.93	39.2717	39.1655	147.72	109.696	132.101	305.15	218.018	269.293	1697.1	1418.2	0.258513	0.233036	0.446616	5627.32	1245.45	2.17594	1.33e-53	6.31e-52	8030.2	1313.22	2.61248	3.26e-92	2.75e-90	5254.49	1394.9	1.91418	4.99e-25	9.14e-24	7527.1	1466.77	2.36039	9.02e-44	2.62e-42	6682.18	4832.32	0.4676
Aco003220	115.484	134.22	135.124	171.995	164.121	166.91	270.498	281.544	314.072	350.057	375.522	311.853	137.518	148.908	136.963	196.167	180.079	197.545	253.17	217.267	263.121	4017.84	3081.48	0.382813	0.000450686	0.00363761	6223.79	2707.92	1.20071	1.44e-19	1.54e-18	7834.62	2856.07	1.45591	1.23e-30	1.82e-29	5811.28	3301.81	0.815699	9.86e-13	7.45e-12	7343.96	3471.64	1.08102	1.51e-25	2.1e-24	6519.12	5343.98	0.286732
Aco022074	163.946	163.329	186.152	339.234	316.439	282.501	191.7	226.862	181.816	137.176	130.194	138.032	257.812	232.828	229.622	232.644	235.781	226.637	204.758	144.382	198.66	7364.53	4041.17	0.86561	1.94e-12	1.43e-10	4238.01	3549.97	0.255433	0.0689268	0.117451	3009.01	3744.46	-0.315691	0.00281244	0.00609853	3957.16	6052.96	-0.61316	8.84e-06	3.17e-05	2820.54	6363.96	-1.17389	2.24e-28	3.58e-27	2503.97	3638.59	-0.53913
Aco011007	61.0034	55.167	48.1492	115.815	89.893	76.3018	594.694	662.617	550.182	413.361	399.322	373.305	64.9302	68.2219	79.9565	164.597	133.528	183.967	298.601	279.493	295.725	2146.9	1255.14	0.774416	6.02e-05	0.000667724	12375.9	1102.43	3.48901	9.18e-122	2.11e-119	8536.82	1162.4	2.87696	8.58e-115	1.23e-112	11555.8	1764.81	2.71121	7e-57	4.81e-55	8002.63	1855.31	2.10907	1.49e-43	4.27e-42	7104.44	10626.1	-0.580731
Aco003551	66.4014	74.7771	72.2194	73.4736	67.0543	68.078	505.387	628.498	790.958	692.674	714.586	472.635	65.7928	85.4241	77.2384	437.634	265.921	482.772	610.307	617.352	912.013	980.816	1006.02	-0.0363445	0.760819	0.878826	8143.54	884.02	3.20367	3.56e-61	2.15e-59	8354.21	932.321	3.16376	1.12e-69	5.72e-68	7603.44	806.042	3.23779	1.03e-76	1.12e-74	7832.5	847.485	3.20826	5.4e-89	5.14e-87	6953.22	6991.1	-0.00786108
Aco022978	101.957	119.084	114.666	129.659	123.365	124.014	114.01	124.686	122.659	129.701	149.218	132.467	65.6433	68.279	70.5534	117.315	109.932	127.728	116.448	106.964	107.136	5535.99	4941.72	0.163874	0.116431	0.281234	4772.55	4342.78	0.136242	0.255144	0.361302	5712.35	4580.12	0.318769	0.00757278	0.0152389	4456.24	4549.46	-0.0297954	0.776517	0.837199	5353.9	4783.44	0.162592	0.0979875	0.159521	4752.23	4097.75	0.21375
Aco030196	346.978	374.383	285.209	429.133	415.881	437.245	231.305	233.82	101.127	126.115	155.609	147.811	217.214	199.247	181.87	168.748	136.685	133.154	187.401	191.897	123.61	9014.14	7097.22	0.345077	0.0103701	0.0470752	3577.68	6236.53	-0.801829	0.00932925	0.0194234	2856.29	6575.34	-1.20289	4.08e-15	2.7e-14	3340.87	7407.37	-1.14893	8.74e-06	3.14e-05	2676.71	7788.51	-1.54101	1.07e-44	3.2e-43	2375.74	3072.38	-0.370897
Aco012539	24.7431	26.644	31.7638	40.4567	41.0836	35.817	49.1662	45.1084	48.2982	50.1465	49.0479	51.7518	66.496	77.6445	94.2222	154.472	164.404	145.168	156.755	158.639	142.799	2430.64	1726.29	0.493093	0.00055517	0.00432718	2656.22	1516.67	0.8082	2.15e-08	9.61e-08	2955.99	1599.93	0.885266	2.26e-11	1.16e-10	2480.24	1997.72	0.312519	0.0110104	0.0232752	2770.74	2100.42	0.400038	0.00013273	0.000376557	2459.69	2281.03	0.108715
Aco002770	191.454	209.102	211.942	236.843	221.392	242.963	79.1428	76.7157	63.3293	70.3496	70.6859	80.8986	175.168	154.306	140.078	49.1108	58.4357	51.9748	70.5567	64.8994	61.7399	8957.07	7845.06	0.191338	0.0485925	0.151862	2518.16	6893.12	-1.45307	3.55e-26	5.5e-25	2681.37	7270.06	-1.43926	4.99e-37	9.65e-36	2351.37	7360.28	-1.64664	3.51e-37	1.15e-35	2513.1	7739	-1.62307	2.54e-56	1.08e-54	2230.9	2162.44	0.0451007
Aco009421	79.436	89.5976	90.0481	107.079	142.388	125.155	197.633	190.693	204.888	223.58	195.673	203.657	94.4908	109.563	102.245	206.995	175.779	194.114	288.825	205.383	249.082	3796.61	2631.73	0.528487	0.000297879	0.00256709	5406.99	2312.55	1.2254	5.99e-27	9.65e-26	5966.39	2439.02	1.29058	6.21e-31	9.34e-30	5048.71	3119.96	0.694644	6.97e-07	2.9e-06	5593.34	3280.72	0.769978	3.17e-09	1.51e-08	4965.96	4643.02	0.0969829
Aco000284	97.6095	128.866	96.578	137.685	170.244	140.439	89.7661	104.883	130.391	79.8774	91.594	86.31	92.9939	94.2378	110.664	186.721	163.511	187.642	155.742	161.675	158.066	5740.91	4145.8	0.46963	0.00477379	0.0253954	3743.77	3644.73	0.0389372	0.847967	0.892575	3120.85	3843	-0.300131	0.0534946	0.0907767	3495.52	4718.21	-0.432386	0.0112314	0.0236765	2924.92	4961.09	-0.762012	6.83e-10	3.46e-09	2596.21	3214.15	-0.308313
Aco000731	94.6282	102.942	83.5196	119.288	145.546	155.076	19.0219	23.263	30.5969	25.0751	23.2697	25.2192	81.5865	84.639	70.0598	41.1124	48.5669	46.1467	25.6831	21.9678	27.0798	10583.8	7104.41	0.575153	0.000122798	0.00120828	1652.78	6242.82	-1.91685	2.43e-20	2.71e-19	1752.97	6582.46	-1.90883	8.31e-55	2.82e-53	1543.16	8696.01	-2.49399	1.57e-39	5.55e-38	1643.19	9144.35	-2.47651	1.31e-88	1.23e-86	1458.79	1418.9	0.0393165
Aco005722	458.289	682.1	626.887	854.471	936.052	804.518	665.789	598.25	507.405	425.578	478.43	552.122	401.107	349.904	406.706	343.931	292.355	292.292	347.269	294.679	191.601	8527.16	5818.36	0.551414	0.00127889	0.00864082	5234.37	5115.79	0.0330116	0.867485	0.907542	4525.69	5395.68	-0.253717	0.171572	0.251206	4887.73	7008.23	-0.519941	0.000233752	0.000679038	4241.07	7368.72	-0.797033	3.43e-10	1.77e-09	3764.45	4495.3	-0.255954
Aco013064	98.2734	132.068	166.874	218.245	110.153	167.666	87.8941	136.441	65.9552	68.4424	109.667	51.87	112.808	188.966	68.0985	564.497	441.992	460.456	232.359	125.126	157.057	4402.34	3533.87	0.317088	0.24442	0.460078	2316.35	3105.94	-0.423318	0.156054	0.238762	1931.04	3277.06	-0.762892	0.00822022	0.0164569	2162.83	3617.69	-0.742379	0.00766284	0.0167333	1809.76	3803.22	-1.07139	0.0109631	0.0225236	1605.9	1988.21	-0.307953
Aco018754	52.7644	60.7353	56.3849	65.8589	67.1936	65.7415	122.709	126.657	99.7778	143.521	139.936	143.699	75.8689	81.9312	90.8614	228.869	168.753	174.887	277.403	253.864	193.611	2580.06	2210.51	0.223088	0.0322165	0.1122	4074.74	1942.57	1.0687	4.03e-13	2.74e-12	5241.82	2048.63	1.35559	1.13e-40	2.53e-39	3804.82	2120.27	0.843469	2.19e-10	1.34e-09	4913.43	2229.36	1.14024	3.69e-41	9.84e-40	4361.87	3498.91	0.318245
Aco012399	186.681	90.9554	146.904	69.5985	102.67	94.5974	151.623	136.454	192.63	169.137	141.574	152.591	357.263	358.97	417.64	98.6615	191.306	122.677	108.801	79.446	161.273	2526.1	4033.41	-0.675232	0.0121918	0.0531053	4093.69	3537.68	0.210578	0.442122	0.561546	4144.46	3731.34	0.151394	0.531911	0.637367	3822.36	2075.68	0.881143	3.94e-06	1.49e-05	3885.46	2182.75	0.832161	1.17e-07	4.75e-07	3449.78	3515.34	-0.027353
Aco008823	77.1983	96.4424	89.0901	87.0098	88.7633	93.2665	66.4698	67.6763	73.4618	91.9095	91.6831	79.2077	81.4736	84.4678	74.5141	100.733	94.0984	111.919	94.9999	82.9148	107.093	4940.18	4836	0.0308669	0.798837	0.89975	3429.42	4250.55	-0.309519	0.0242945	0.0462878	4561.95	4482.77	0.0254285	0.848061	0.88983	3202.14	4059.48	-0.342163	0.00184261	0.00456836	4276.54	4268.45	0.00283353	0.9779	0.984207	3796.48	2944.7	0.366534
Aco005874	28.357	39.7269	42.0635	55.6026	61.7689	53.2053	81.2677	78.9482	82.4317	64.5046	68.7963	69.5573	46.2235	47.5731	46.2906	129.059	104.234	106.32	129.036	96.0713	85.2115	3905.68	2526.83	0.628062	0.000340597	0.00287396	4997.19	2221.25	1.16972	7.5e-11	4.26e-10	4392.01	2343.14	0.906385	1.04e-07	3.85e-07	4666.07	3209.93	0.540004	3.15e-06	1.21e-05	4116.43	3375.07	0.286813	0.00589328	0.0127972	3654.04	4291.1	-0.231942
Aco000916	22.5684	38.1987	39.132	38.6774	39.3429	46.1216	439.853	563.52	978.83	410.206	304.134	335.511	52.0337	62.7345	68.7059	141.387	129.003	158.317	201.211	163.69	205.008	1050.16	846.56	0.311147	0.177934	0.375352	15095.2	744.45	4.3418	4.25e-40	1.28e-38	8393.7	785.333	3.41795	1.86e-51	5.71e-50	14093.4	862.845	4.02961	3.11e-58	2.27e-56	7870.29	907.294	3.11609	7.02e-110	1.03e-107	6988.59	12958.3	-0.890826
Aco023566	17.549	18.7344	19.7289	18.1197	22.8763	20.6019	14.5146	11.5385	14.1865	10.6093	9.84806	12.2519	16.7356	15.3724	14.998	12.309	12.6628	16.1934	21.8898	17.7313	19.5831	6094.49	5555.29	0.133477	0.30239	0.527149	3581.49	4880.89	-0.446589	0.00185169	0.0043961	3059.94	5147.98	-0.750762	3.61e-09	1.53e-08	3344.24	5008.29	-0.582522	0.000102523	0.000315415	2868.02	5266.29	-0.876809	3.65e-11	2.05e-10	2546.11	3075.97	-0.272943
Aco011247	44.8811	79.0627	64.4918	143.192	119.248	105.88	110.419	58.9254	72.5588	72.7761	89.9082	75.6238	51.8902	73.1422	85.0897	139.721	159.009	190.954	138.195	93.4566	119.164	5984.93	3067.79	0.964184	1.32e-05	0.000182683	3537.09	2698.43	0.390422	0.178163	0.267716	3662.54	2845.84	0.364113	0.0905771	0.144248	3303.07	4919.38	-0.574766	0.0102893	0.021892	3432.53	5171.88	-0.591282	3.58e-05	0.00011006	3046.6	3039.15	0.00373324
Aco019975	11.8544	11.0429	6.83632	39.0453	33.0285	30.1436	334.249	357.823	276.241	307.204	345.054	400.089	19.9111	20.1348	28.4268	97.3978	64.1418	78.928	161.807	113.333	118.217	1360.68	397.228	1.77724	5.27e-14	5.1e-12	11591.7	348.95	5.05499	6.64e-105	1.17e-102	13252.7	367.805	5.17235	4.52e-125	7.7e-123	10823.8	1118.38	3.2749	7.91e-101	1.5e-98	12419.2	1175.81	3.40106	9.29e-129	1.98e-126	11023.5	9953.24	0.147354
Aco011535	117.046	124.665	112.402	126.22	115.264	127.235	216.805	266.709	234.912	269.684	274.246	253.959	102.827	117.742	111.05	165.458	168.161	170.323	159.178	172.979	169.355	3607.4	3474.52	0.0545438	0.599401	0.77912	6321.82	3052.89	1.0503	1.36e-15	1.12e-14	7381.36	3219.34	1.19736	2.4e-35	4.33e-34	5902.77	2964.32	0.993552	2.61e-15	2.43e-14	6919.06	3116.82	1.15026	1.24e-35	2.74e-34	6142.19	5427.4	0.178496
Aco014950	201.717	223.899	187.024	208.635	216.651	179.913	421.042	464.24	392.784	608.558	655.767	595.869	216.399	261.866	225.785	365.481	285.668	343.627	432.792	414.605	496.537	2857.88	2900.79	-0.0216704	0.871828	0.93995	5427.06	2549.09	1.09034	9.6e-16	7.98e-15	8305.33	2687.88	1.62786	2.4e-45	6.17e-44	5067.45	2348.95	1.10957	5.81e-17	6.14e-16	7784.69	2469.7	1.65688	6.5e-51	2.41e-49	6910.26	4659.77	0.568599
Aco029176	69.6287	87.5826	85.011	89.4354	93.1938	104.686	279.944	326.796	295.863	372.281	374.672	359.389	109.768	121.226	112.885	259.051	235.568	216.901	291.992	250.208	239.807	2321.3	1961.61	0.243159	0.0845675	0.224089	6558.7	1724.12	1.92763	1.15e-39	3.41e-38	8451.56	1818.43	2.21662	2.54e-70	1.32e-68	6124	1907.31	1.68267	2.03e-41	7.88e-40	7922.14	2005.56	1.98147	1.38e-88	1.29e-86	7032.69	5631.05	0.320666
Aco008450	71.9632	78.8513	81.6848	85.6407	89.4561	91.8713	58.2388	51.6267	55.745	59.5572	58.6634	61.6389	69.2758	71.7293	78.3475	63.541	64.6759	61.9288	77.0622	72.9363	68.7715	6028.02	5263.18	0.195737	0.0496974	0.154008	3363.93	4624.52	-0.4592	0.000106118	0.000306037	3840.1	4877.55	-0.345114	0.000560436	0.00134702	3141.08	4953.45	-0.657223	3.65e-09	1.98e-08	3599.42	5208.45	-0.533207	1.05e-09	5.24e-09	3195.33	2888.88	0.14544
Aco000686	157.536	180.007	175.34	116.366	103.889	110.664	49.5154	39.6183	63.9789	33.6178	37.4739	45.1858	118.673	112.666	108.423	36.8936	47.2746	52.524	8.92742	12.9616	12.604	6496.84	10096	-0.635869	1.62e-09	6.51e-08	2705.86	8871.89	-1.71296	1.56e-17	1.46e-16	2159.8	9356.8	-2.11544	7.67e-47	2.06e-45	2526.52	5338.95	-1.07919	2e-09	1.11e-08	2023.93	5613.49	-1.47219	2.79e-29	4.7e-28	1796.48	2323.77	-0.371722
Aco007469	52.677	49.2293	35.6678	44.6172	46.5735	55.3161	190.523	194.793	216.152	311.19	292.207	267.577	60.3137	67.07	78.4411	158.884	129.978	146.593	290.395	231.659	283.172	1617.9	1524.41	0.0864463	0.649544	0.810615	5975.66	1339.1	2.15819	1.43e-31	2.93e-30	9092.69	1411.68	2.68767	1.77e-56	6.31e-55	5579.61	1329.28	2.06905	1.34e-53	8.23e-52	8524.16	1397.78	2.6078	1.87e-105	2.5e-103	7567.67	5131.01	0.560553
Aco002975	22.4497	26.8705	27.9087	27.4335	31.5175	31.0498	30.1149	25.0856	32.5279	21.7005	17.5916	24.3409	23.8921	23.1189	22.6047	20.9405	21.1764	24.0161	29.942	29.3182	26.919	5605.3	4820.86	0.217437	0.0986218	0.249355	4915.9	4236.63	0.214587	0.187839	0.279845	3747.12	4468.65	-0.254204	0.119225	0.183421	4590.19	4606.07	-0.00487111	0.972621	0.980074	3512.4	4843.3	-0.46368	0.000842596	0.00212157	3118.5	4221.79	-0.437215
Aco014849	311.61	261.909	318.22	316.285	371.795	268.117	133.018	137.114	92.2183	107.002	110.318	111.367	204.224	210.647	197.224	131.279	142.675	104.713	95.1323	97.4273	88.8717	8172.7	7642.85	0.0964968	0.552774	0.746276	2783.86	6711.36	-1.26977	4.18e-11	2.43e-10	2655.93	7078.91	-1.41447	2.65e-33	4.41e-32	2599.49	6717.85	-1.36988	3.33e-13	2.62e-12	2489.39	7063.24	-1.50434	4.34e-29	7.23e-28	2209.83	2390.5	-0.113067
Aco017575	65.6831	84.6687	77.8223	106.243	86.4314	104.235	66.8608	73.9107	75.0332	68.8397	63.093	64.901	72.4129	72.5185	69.4673	62.2512	61.3804	59.1847	59.6085	55.6113	61.9081	6544.94	5042.59	0.37639	0.0103726	0.0470763	4279.92	4432.43	-0.0503836	0.729556	0.804896	4102.9	4674.63	-0.188132	0.151436	0.225702	3996.24	5378.05	-0.428518	0.000968925	0.00253532	3846.16	5654.62	-0.556223	7.82e-07	2.92e-06	3414.61	3674.73	-0.106041
Aco000349	82.0849	87.0778	110.615	129.585	113.38	108.119	83.232	68.2531	119.657	68.523	71.1963	71.366	86.4591	92.4684	86.6494	108.57	101.554	81.542	77.6781	70.2521	71.4315	6163.09	4923.55	0.323817	0.0373373	0.125231	4284.85	4325.46	-0.0135401	0.955051	0.968349	3504.28	4563.22	-0.38109	0.00843044	0.016847	4000.81	5065.32	-0.340185	0.0927063	0.152426	3284.53	5325.55	-0.697224	4.47e-11	2.49e-10	2915.66	3679.65	-0.335954
Aco011098	31.4568	45.9437	34.7302	73.4192	72.4156	77.6716	231.271	267.034	178.879	196.764	211.548	187.533	47.2859	58.5875	56.1717	207.201	203.941	186.368	307.319	229.047	261.151	2479.97	1247.04	0.992351	3.88e-09	1.43e-07	6755.58	1096.55	2.62337	9.29e-34	2.09e-32	6251.48	1156.26	2.43526	3.89e-48	1.09e-46	6308.03	2037.85	1.62995	3.54e-24	6.18e-23	5859.7	2142.73	1.4512	2.51e-51	9.38e-50	5201.52	5800.31	-0.157049
Aco017569	27.3583	30.5313	25.8267	41.4952	35.9617	36.4269	57.9712	59.9952	44.0627	56.6405	59.4082	65.6862	60.0256	58.5537	58.194	56.0373	53.19	61.8849	46.7628	51.9912	50.554	3705.49	2731.71	0.440114	0.000398367	0.0032749	4740.94	2400.52	0.981828	5.3e-09	2.51e-08	5593.14	2531.27	1.14393	1.25e-20	1.13e-19	4426.91	3045.29	0.539544	0.000428046	0.00119006	5241.98	3201.79	0.711079	1.27e-10	6.86e-10	4653.19	4070.99	0.192955
Aco004773	169.738	153.008	182.416	93.4802	118.08	118.181	154.525	184.409	144.336	132.25	119.836	124.903	152.851	153.131	160.442	164.96	186.352	183.571	186.705	192.72	212.212	3324.16	5106.41	-0.619444	2.26e-05	0.000288345	4380.2	4484.74	-0.0341739	0.817856	0.869744	3592.48	4730.43	-0.397135	0.000424941	0.00103762	4089.93	2731.4	0.582415	0.00015239	0.000456569	3367.7	2872.2	0.229672	0.0669179	0.114298	2989.86	3760.64	-0.330811
Aco002432	58.0897	66.5178	69.8833	75.7319	75.106	79.798	79.7665	75.2053	91.205	79.0673	75.0696	79.3016	76.431	79.1252	83.5323	96.6435	86.9647	88.4199	85.696	93.6638	86.7428	4561.59	3856.3	0.242354	0.0320583	0.111857	4380.88	3388.64	0.370599	0.00988209	0.0204671	4365.63	3574.19	0.288492	0.011262	0.0220365	4090.55	3748.4	0.126096	0.307709	0.410317	4092.18	3941.32	0.0539865	0.537438	0.638449	3632.89	3761.9	-0.0505416
Aco000589	266.007	257.851	299.094	256.2	282.801	253.162	373.408	419.5	564.41	553.247	559.35	474.065	359.377	369.817	368.145	401.099	377.082	437.755	345.02	380.087	547.217	3268.01	3403.91	-0.0592317	0.612114	0.786596	5038.17	2989.98	0.752843	7.85e-05	0.000230743	6187.33	3153.81	0.972163	1.53e-15	1.04e-14	4704.07	2685.76	0.808891	2.53e-06	9.81e-06	5800.2	2823.96	1.03882	7.44e-21	8.1e-20	5149.04	4325.54	0.251272
Aco006946	68.2561	74.6615	78.6083	91.9022	85.3267	81.4944	122.121	121.912	116.904	131.976	136.465	120.275	73.5368	74.6404	80.5434	70.4498	78.0027	76.1911	75.2168	68.7803	67.8184	4635.24	3979.13	0.220058	0.0457844	0.1452	5816.53	3496.25	0.734266	1.92e-11	1.14e-10	6584.53	3687.61	0.836419	3.71e-14	2.31e-13	5431.15	3809.48	0.511706	2.43e-06	9.46e-06	6172.21	4005.3	0.624062	6.56e-10	3.33e-09	5479.14	4994.6	0.133716
Aco009576	47.8259	57.4234	55.8429	60.9687	60.7184	58.8961	118.451	123.465	107.283	100.328	103.904	108.383	55.7854	59.0023	56.1463	92.8889	70.3021	76.0233	62.4964	71.6386	63.2673	3837.04	3431.24	0.161229	0.154822	0.343504	6672.92	3015.53	1.1459	5.53e-18	5.36e-17	6281.57	3180.42	0.98191	4.34e-17	3.26e-16	6230.81	3153.31	0.982551	6.28e-19	7.81e-18	5887.53	3315.52	0.828478	3.31e-21	3.67e-20	5226.32	5729.8	-0.132652
Aco003843	118.192	123.271	98.2631	126.9	109.373	106.118	252.892	319.299	344.377	264.001	238.404	202.965	109.59	117.143	101.85	198.892	176.688	193.208	297.331	338.8	386.148	2770.57	2757.45	0.00702899	0.961294	0.98432	6672.45	2422.83	1.46176	8.53e-17	7.61e-16	5395.08	2554.54	1.07888	8.43e-13	4.81e-12	6230	2277.06	1.45221	6.4e-21	9.11e-20	5058.26	2394.04	1.07937	2.61e-16	2.16e-15	4490.9	5728.19	-0.351099
Aco012895	23.5891	26.0459	27.4359	26.1038	29.4039	26.7006	42.8742	34.0882	43.5199	34.1838	31.6908	35.4155	32.4251	33.6529	36.6759	43.3591	41.4705	47.8215	49.5541	47.1489	46.756	3611.99	3394.49	0.0892982	0.437771	0.655377	4762.63	2982.61	0.675191	1.02e-05	3.39e-05	4207.59	3145.88	0.419383	0.000180333	0.000462315	4447.13	2968.38	0.583398	4.13e-05	0.000135358	3944	3121.16	0.337779	0.00107483	0.00266065	3501.39	4090.37	-0.224406
Aco018558	69.9565	73.4455	78.2295	93.7223	92.7682	87.7643	148.197	146.142	140.116	129.115	124.933	130.953	99.3365	96.0703	110.468	133.566	138.775	136.557	140.631	132.209	116.988	3823.79	3098.22	0.303297	0.00226817	0.0138536	5448.3	2722	1.001	7.37e-22	9.06e-21	5075.52	2870.96	0.821861	9.73e-18	7.6e-17	5087.32	3142.52	0.69508	2.4e-11	1.61e-10	4757.52	3304.13	0.526094	2.41e-09	1.16e-08	4223.48	4678.47	-0.147577
Aco011493	48.3086	52.4559	58.1405	61.0604	78.7033	69.9182	76.7214	71.2517	87.6245	77.4243	73.514	81.6391	60.4635	61.5601	64.5955	98.8564	91.6655	107.004	104.821	93.4202	94.9036	4332.46	3290.89	0.396455	0.0059661	0.0302845	4378.97	2891.42	0.598848	3.67e-05	0.000112888	4543.1	3049.86	0.574733	1.02e-06	3.4e-06	4088.77	3560.32	0.199931	0.17675	0.261503	4258.39	3743.74	0.185995	0.129733	0.202657	3780.41	3760.3	0.00746387
Aco013139	9.50834	1.98413	0.928532	32.1955	23.5	10.1373	508.624	517.281	372.996	365.144	349.306	380.107	11.5488	14.9994	18.4375	118.498	73.3958	55.2201	264.829	266.044	184	685.568	130.311	2.39538	0.0177152	0.0710746	13099.2	114.038	6.84389	5.71e-13	3.84e-12	10778.5	120.114	6.48766	4.94e-12	2.67e-11	12231.6	563.869	4.43952	1.85e-23	3.11e-22	10103	592.664	4.09181	9.63e-19	9.2e-18	8969.02	11248.4	-0.326641
Aco006122	107.609	111.192	104.988	70.3244	92.2331	99.5753	148.38	137.453	124.872	202.48	190.233	183.364	133.608	144.901	148.811	134.947	147.65	175.082	270.523	181.105	237.049	2769.78	3430.45	-0.308518	0.0513569	0.15777	3902.62	3013.91	0.372703	0.00179413	0.00426954	5753.77	3178.36	0.856418	1.66e-20	1.5e-19	3644.12	2275.64	0.67913	2.51e-05	8.45e-05	5393.81	2393.04	1.17241	1.06e-16	9e-16	4788.54	3351.44	0.515066
Aco006006	42.0426	139.254	56.8841	215.289	228.094	139.951	2188.28	1718.58	1205.84	1096.4	2920.13	457.311	86.4229	84.7369	52.9445	46.3005	26.2181	50.2737	68.8062	125.07	70.3088	2001.16	817.866	1.29119	0.00112528	0.00777885	15768.2	720.651	4.452	3.53e-27	5.76e-26	14512.5	759.554	4.25608	2.43e-06	7.78e-06	14724.7	1645.25	3.16223	5.46e-41	2.07e-39	13597.7	1729.69	2.97482	6.28e-05	0.000186545	12059.5	13544.3	-0.16751
Aco011776	53.7134	59.382	58.8171	63.6542	60.5282	55.5541	177.954	175.584	194.155	150.645	157.614	154.693	63.7373	71.4596	67.2891	154.652	123.535	138.598	170.96	154.674	151.149	2504.75	2401.98	0.0602068	0.589915	0.772488	6866.36	2110.59	1.70201	1.08e-50	4.71e-49	6100.71	2225.95	1.45459	1.29e-51	3.99e-50	6411.33	2058.59	1.63927	8.54e-44	3.65e-42	5718.18	2164.4	1.40193	8.84e-47	2.82e-45	5075.98	5896.03	-0.21615
Aco012902	23.4396	26.1945	29.3029	33.6201	34.1338	32.8769	49.9752	45.0797	52.1597	37.0647	39.4972	41.2996	45.6983	46.8892	50.9299	56.2187	54.7408	53.5108	65.6759	64.3897	54.9474	3563.08	2801.73	0.346564	0.00426473	0.0231472	4689.46	2461.77	0.929666	4.89e-11	2.83e-10	3946.62	2596.74	0.603706	2.26e-06	7.27e-06	4378.74	2928.16	0.580692	4.69e-07	1.99e-06	3698.91	3078.79	0.264748	0.00495654	0.0109106	3283.41	4027.09	-0.2947
Aco010154	72.3297	89.6279	82.6124	129.017	138.971	124.714	184.228	215.683	185.271	172.581	176.919	176.908	76.2496	79.8178	83.1209	158.356	130.331	118.22	176.22	160.153	143.159	4659.21	2908.49	0.67975	4.92e-08	1.38e-06	6243.25	2556.35	1.2883	2.37e-19	2.51e-18	5905.26	2695.99	1.1313	1.31e-21	1.26e-20	5829.48	3829.13	0.606514	6.52e-07	2.73e-06	5535.06	4026.12	0.459499	5.82e-07	2.2e-06	4913.5	5360.23	-0.125538
Aco019311	45.5464	57.6836	39.7323	40.7553	50.5393	62.4035	153.031	150.218	128.476	230.311	213.909	235.954	55.6863	85.1356	73.8662	198.466	169.916	204.786	333.136	282.585	285.698	1683.34	1569.88	0.101216	0.634034	0.801347	4252.24	1380.07	1.62383	8.37e-19	8.53e-18	7043.46	1454.98	2.27578	2.97e-45	7.6e-44	3970.57	1382.86	1.52123	2.67e-18	3.15e-17	6602.27	1454.23	2.18219	5.78e-46	1.8e-44	5861.34	3651.49	0.682898
Aco005004	53.0881	53.9736	53.0247	51.1832	49.6565	58.0661	62.2987	68.0304	84.218	80.7759	79.7078	83.2595	164.757	164.717	151.388	130.201	128.968	144.539	109.008	111.994	113.567	2573.79	2600.41	-0.0143361	0.896692	0.952923	3126.88	2284.55	0.453094	0.00357066	0.00806708	3733.36	2409.29	0.63183	1.93e-13	1.15e-12	2919.57	2114.77	0.465274	0.00252115	0.00608562	3499.38	2223.66	0.653564	2.53e-10	1.33e-09	3106.51	2684.69	0.210162
Aco010213	57.8777	63.3572	64.4971	80.2503	96.1364	84.1279	78.0173	93.2997	85.4477	94.5818	97.2956	91.0081	83.7592	91.6731	98.3648	92.5387	104.625	107.029	89.7607	91.7453	93.3738	4675.13	3341.2	0.484389	6.06e-05	0.000671272	4143.49	2935.77	0.497158	7.82e-05	0.000229781	4799.19	3096.33	0.632275	1.25e-10	5.97e-10	3868.84	3842.12	0.0102494	0.938461	0.95674	4498.52	4039.92	0.155476	0.148893	0.22788	3993.38	3557.35	0.166778
Aco001839	358.276	361.869	361.547	434.461	412.063	398.272	250.77	336.289	309.442	417.772	403.036	366.704	347.774	375.153	380.743	312.451	338.641	338.449	272.773	243.53	269.637	5575.45	4858.62	0.198472	0.0255578	0.0939203	3611.44	4268.38	-0.240984	0.103074	0.166917	5028.35	4501.52	0.159815	0.0938669	0.148899	3371.99	4582.08	-0.442237	0.00180521	0.00448344	4713.79	4817.67	-0.0312497	0.749131	0.816363	4184.76	3100.23	0.43268
Aco007557	43.8761	55.0184	41.0008	56.7649	57.5467	54.6844	73.1495	69.5975	75.2773	102.999	102.751	106.369	62.9177	66.8451	66.6523	94.8019	88.5439	83.8814	139.157	127.801	113.44	3350.41	2780.66	0.269107	0.0636735	0.184375	3888.33	2444.31	0.670009	2.18e-05	6.9e-05	5851.04	2577.21	1.18317	9.54e-17	7.04e-16	3630.68	2753.43	0.399229	0.000205392	0.000602404	5484.3	2895.06	0.9219	7.33e-27	1.09e-25	4868.54	3338.97	0.543982
Aco017185	70.7899	90.5311	85.7548	177.004	132.132	142.397	196.001	206.137	192.672	144.315	167.841	164.06	68.14	60.3252	53.6786	112.479	84.8318	96.5762	152.961	141.927	128.762	5758.15	3158.88	0.866287	9.81e-08	2.49e-06	6823.91	2776.56	1.29736	1.1e-20	1.25e-19	5745.13	2928.38	0.97227	4.59e-12	2.48e-11	6371.73	4732.35	0.429043	0.00231991	0.00564142	5384.21	4975.32	0.113829	0.397162	0.510297	4779.05	5859.34	-0.294037
Aco014644	18.6558	18.6685	19.7064	22.184	25.4149	26.4945	11.989	10.2648	11.9424	8.28122	7.06712	10.1842	16.485	15.4162	14.6418	8.79058	9.50053	10.5453	7.05936	7.48337	7.34746	8216.24	6341.2	0.373706	0.0008954	0.00644893	3411.4	5570.63	-0.70747	4.18e-09	2e-08	2677.54	5875.28	-1.13404	4.13e-13	2.41e-12	3185.4	6751.15	-1.08365	1.48e-16	1.51e-15	2509.57	7098.99	-1.50048	4.96e-24	6.41e-23	2228.02	2929.7	-0.395297
Aco002628	256.728	349.197	320.828	165.309	194.376	226.315	30.4196	24.4522	23.7886	7.10207	11.6195	14.3209	148.919	154.006	120.194	37.7751	54.082	29.4531	45.1365	35.8902	28.247	7766.95	12310.3	-0.664381	0.000115015	0.00114371	937.773	10821.9	-3.529	8.83e-86	1.02e-83	414.587	11413.6	-4.784	5.05e-83	3.47e-81	875.676	6381.11	-2.86593	7.3e-68	6.73e-66	388.339	6710.19	-4.11232	3.15e-80	2.43e-78	344.594	805.441	-1.22575
Aco002721	242.847	263.979	261.059	326.868	311.932	351.719	16.5016	20.1233	14.769	24.7451	21.1465	22.4048	188.323	192.778	154.508	17.7889	36.1162	21.3056	9.12546	7.36737	11.3819	11912.4	9260.09	0.363474	0.000216234	0.00196277	555.783	8136.45	-3.87244	7.65e-141	2.55e-138	776.503	8581.1	-3.46596	2.5e-217	1.28e-214	518.953	9788.38	-4.23817	5.2e-189	5.54e-186	727.966	10292.2	-3.82151	6.76e-281	8.32e-278	646.327	477.162	0.438433
Aco014347	48.6332	54.3149	62.5929	10.7671	15.4485	17.7967	65.3897	59.6589	46.4673	63.1554	67.433	78.3818	54.4193	58.453	51.5995	30.8584	28.0522	36.1155	116.054	122.271	112.307	1204.06	4539.03	-1.9143	2.12e-20	5.27e-18	4218.92	3988.22	0.0809337	0.654834	0.745575	5406.7	4207.04	0.361768	0.01496	0.0285963	3939.55	989.139	1.99344	2.86e-22	4.5e-21	5066.95	1040.22	2.28387	3.02e-37	7.06e-36	4497.72	3623.22	0.312048
Aco011742	16.1688	17.5573	21.7126	12.3432	14.0439	16.5239	44.8278	32.7527	47.4355	30.2251	22.1511	31.4198	19.2576	19.2418	20.8011	25.863	22.777	29.7038	43.3186	38.1553	36.8013	2552.42	3305.44	-0.372906	0.0300198	0.106456	6691.97	2904.07	1.20429	1.67e-09	8.35e-09	4712.23	3063.64	0.620986	0.000717283	0.00169969	6248.66	2097.01	1.57507	1.35e-18	1.63e-17	4417.56	2205.14	1.00207	8.54e-10	4.28e-09	3922.5	5747.69	-0.551326
Aco005857	55.3295	59.1001	60.693	83.3647	70.2942	70.2263	100.444	116.912	143.414	110.401	104.619	95.0403	70.3724	76.3255	73.3937	152.118	148.286	134.117	130.018	145.698	140.909	3461.71	2715.22	0.350399	0.00365587	0.0204068	5019.49	2385.62	1.07332	2.05e-10	1.12e-09	4532.5	2516.09	0.849224	2.89e-15	1.93e-14	4686.65	2845.03	0.720271	1.03e-05	3.65e-05	4249.07	2991.19	0.506523	1.33e-05	4.32e-05	3772.26	4309.42	-0.192203
Aco011549	55.1728	34.1475	73.9499	21.4903	22.4904	32.2027	76.7379	76.1294	185.473	102.47	74.4278	86.8837	69.5252	98.1867	102.135	80.4737	89.8447	137.142	66.0736	45.9013	126.236	1496.16	3216.08	-1.1039	0.000104778	0.00105773	5984.73	2822.26	1.08442	0.00560128	0.0121735	4896.6	2978.43	0.717051	0.00636036	0.0129613	5587.57	1228.99	2.18469	3.68e-06	1.4e-05	4591.19	1292.4	1.82807	1.13e-24	1.5e-23	4076.88	5138.29	-0.333869
Aco001216	40.2713	47.4767	48.4442	147.258	135.13	91.6831	163.716	149.332	123.839	119.014	127.69	133.127	57.0719	54.5817	53.8031	108.011	94.3322	81.3012	149.815	142.869	106.733	5826.65	2126.39	1.4541	1.94e-13	1.74e-11	6119.54	1868.65	1.71131	1.34e-26	2.11e-25	5594.98	1970.93	1.50518	1.99e-34	3.46e-33	5714.27	4790.24	0.254555	0.188993	0.276735	5243.78	5035.92	0.0585251	0.727888	0.799346	4654.71	5255.42	-0.174997
Aco001454	133.674	121.868	137.589	106.677	125.301	116.918	74.0113	62.8753	80.25	61.3728	63.8074	73.2794	152.781	152.228	178.679	55.5459	90.8674	79.7906	70.4381	53.6079	69.74	5329.59	6021.95	-0.176408	0.131647	0.307474	2984.11	5289.02	-0.825625	9.24e-09	4.27e-08	2866.94	5578.43	-0.960667	2.23e-15	1.5e-14	2786.39	4379.71	-0.652219	4e-06	1.51e-05	2686.9	4605.25	-0.777448	4.55e-11	2.53e-10	2385.1	2562.72	-0.103938
Aco019083	92.9044	112.331	97.641	104.582	107.878	99.1448	121.681	138.473	128.62	116.05	126.777	116.136	82.3936	79.048	79.466	106.374	110.71	128.146	150.672	153.376	166.643	4209.83	4102.13	0.0373736	0.75154	0.872999	4723.79	3605.38	0.389945	0.00341255	0.00774024	4585.63	3802.02	0.270534	0.0245719	0.0450139	4410.71	3459.8	0.350533	0.00197546	0.00486489	4298.07	3637.76	0.240943	0.0118323	0.0241617	3815.23	4055.75	-0.0881925
Aco017570	195.634	215.125	204.125	286.157	315.342	256.308	208.695	243.091	198.959	373.041	376	345.277	179.451	199.763	208.315	190.882	212.606	189.441	204.913	165.644	170.668	5699.45	4095.73	0.476497	9.33e-05	0.000958623	3887.55	3598.89	0.111296	0.392527	0.512953	6873.3	3795.4	0.85691	6.34e-19	5.28e-18	3629.93	4684.46	-0.367802	0.00829382	0.0179675	6442.93	4925.35	0.387853	0.000504579	0.00131176	5719.57	3337.74	0.77717
Aco021005	119.196	130.736	114.749	106.242	107.331	106.82	114.295	120.212	145.932	82.5216	98.4872	90.4228	116.122	109.177	112.845	68.1868	69.7292	87.3271	107.835	94.0322	114.047	4664.55	5323.95	-0.190645	0.0540875	0.164134	4983.31	4678.24	0.0913508	0.53984	0.651662	3737.45	4933.22	-0.400391	0.000929282	0.00217163	4652.96	3833.24	0.279786	0.035683	0.0660859	3502.69	4030.47	-0.202457	0.0502263	0.0886723	3108.94	4278.76	-0.460945
Aco017759	108.148	114.462	138.806	119.259	106.854	125.427	208.777	267.197	266.548	246.527	234.87	203.438	134.385	130.26	136.369	138.015	131.757	167.862	117.5	117.277	156.364	3457.64	3564.04	-0.0436528	0.758072	0.877176	6569.92	3131.14	1.06915	2.59e-10	1.4e-09	6368	3303.05	0.946973	4.53e-11	2.26e-10	6134.3	2841.1	1.11032	9.41e-15	8.42e-14	5969.95	2987.3	0.99865	6.05e-18	5.55e-17	5300.03	5640.13	-0.0897586
Aco013124	84.803	109.724	101.36	125.527	126.698	120.755	191.465	212.133	203.928	201.828	199.062	186.072	130.562	140.569	131.504	252.357	209.927	232.154	244.148	203.738	240.179	3365.78	2676.26	0.330728	0.0116231	0.0512619	4930.95	2352.44	1.06784	1.49e-13	1.05e-12	5007.62	2481	1.01337	1.93e-14	1.23e-13	4604.14	2766.06	0.735301	8.4e-12	5.87e-11	4694.14	2908.34	0.690973	1.89e-14	1.38e-13	4167.2	4233.71	-0.0228253
Aco017824	91.7008	101.199	127.098	107.32	115.422	98.627	132.901	143.323	162.751	106.062	105.061	114.595	95.8034	90.247	91.0413	153.851	160.714	186.57	116.766	112.376	112.995	4135.43	4126.96	0.00266654	0.986482	0.994491	5081.37	3625.93	0.486846	0.00483279	0.0106257	3963.15	3825.27	0.0508946	0.737249	0.802202	4744.53	3398.84	0.481594	0.000315143	0.000896764	3714.63	3573.64	0.0560751	0.597058	0.68932	3297.57	4362.89	-0.404153
Aco014006	16.3615	21.3533	18.0806	24.0153	29.1116	22.6226	62.0604	59.4444	53.9686	42.7655	49.6983	50.1908	20.6239	21.6186	19.4133	59.4231	51.0852	54.1267	99.1329	91.9493	74.7399	2691.09	1986.51	0.437748	0.00710596	0.0348933	5605.54	1746.26	1.68276	8.82e-29	1.57e-27	4792.46	1841.51	1.38007	6.13e-21	5.68e-20	5234.21	2211.85	1.24316	2.05e-18	2.44e-17	4491.3	2325.65	0.950019	1.09e-12	6.95e-12	3986.49	4813.67	-0.271979
Aco003016	22.1904	24.0945	23.7658	31.451	28.7287	30.8303	41.2628	35.9503	47.158	42.1402	35.8045	44.8952	30.3073	31.0443	33.9828	50.1633	43.8992	41.0009	41.7976	44.063	37.9721	3916.15	3022.53	0.373891	0.000127383	0.00124449	4815.96	2655.77	0.858825	5.91e-09	2.79e-08	4998.35	2800.89	0.835477	3.2e-11	1.62e-10	4496.83	3218.13	0.482716	0.000510696	0.00140173	4685.35	3383.65	0.469314	5.39e-05	0.000161742	4159.8	4135.77	0.00815835
Aco006959	59.3651	61.6259	61.7684	71.3193	62.7338	63.1432	146.202	152.653	191.346	184.119	173.171	149.933	58.4736	64.7864	64.1805	139.744	124.724	139.425	189.427	202.592	218.694	2544.82	2365.18	0.105655	0.321032	0.546019	5692.45	2077.97	1.45403	3.61e-22	4.51e-21	6187.82	2191.51	1.49763	2.02e-38	4.13e-37	5315.08	2091.41	1.34574	6.08e-20	8.14e-19	5801.12	2198.9	1.39964	5.34e-33	1.05e-31	5150.21	4887.66	0.0754096
Aco009899	145.616	143.523	138.049	146.196	155.772	160.843	118.047	125.875	114.395	219.341	179.054	177.494	164.765	181.028	177.352	158.814	176.826	153.701	178.127	179.538	201.043	4373.72	4048.7	0.111509	0.247735	0.464451	3045.45	3556.7	-0.2239	0.0299174	0.0559064	5143.56	3750.75	0.45571	0.000201323	0.000513411	2843.65	3593.99	-0.337942	0.00231338	0.00562811	4822.58	3779.04	0.351848	0.00278018	0.00641224	4281.99	2614.94	0.711633
Aco021078	22.9529	26.8745	25.883	34.4266	37.3399	37.2832	40.7785	41.9187	46.7736	35.6884	35.1637	36.6043	35.2994	36.4912	34.2654	43.644	39.8893	44.6445	42.7154	48.2121	47.6685	4457.75	3102.5	0.522904	2.57e-06	4.39e-05	4761.05	2726.49	0.804404	5.73e-10	2.99e-09	4153.33	2875.51	0.53048	8.3e-07	2.8e-06	4445.49	3663.14	0.279434	0.0168121	0.033885	3893.04	3851.73	0.0153798	0.865121	0.906563	3455.99	4088.06	-0.242529
Aco002754	142.842	184.632	176.827	336.434	337.959	268.632	192.696	208.143	140.874	92.7536	100.965	115.631	115.634	122.184	132.014	75.2633	89.2138	67.6468	87.3888	76.3816	62.7702	9753.58	5227.45	0.89975	7.89e-09	2.69e-07	5036.99	4594.84	0.132463	0.498129	0.614385	3026.2	4846.17	-0.679473	9.31e-06	2.81e-05	4703.35	8017.14	-0.769452	1.06e-05	3.74e-05	2836	8429.04	-1.57158	3.4e-31	6.19e-30	2517.36	4325.04	-0.780788
Aco004074	179.292	138.887	139.9	39.7172	77.7208	56.9489	9.04102	10.5038	14.3975	9.90393	12.1033	12.0385	207.113	198.061	143.391	34.303	54.3012	25.4932	19.014	21.3613	31.066	3571.28	9408.02	-1.39764	1.19e-08	3.86e-07	625.152	8260.16	-3.7229	2.5e-66	1.77e-64	659.151	8710.15	-3.72438	3.7e-121	5.91e-119	583.691	2934.89	-2.3291	2.32e-20	3.2e-19	617.698	3086.37	-2.32085	1.11e-26	1.65e-25	548.247	536.71	0.0291739
Aco012032	64.6077	53.0703	64.3612	53.0526	50.4923	75.3994	45.0218	40.852	45.2376	46.7521	44.985	46.7677	48.7196	45.3696	41.2246	37.3833	36.7373	34.9055	41.1993	51.9212	43.6904	5598.97	5714.31	-0.0292664	0.87671	0.942012	3691.27	5017.62	-0.442962	0.00108196	0.00267109	4098.36	5292.32	-0.369011	0.00193531	0.00430654	3446.71	4599.19	-0.416392	0.0150943	0.0308105	3841.64	4836.4	-0.332523	0.0319892	0.0591769	3410.43	3169.9	0.105455
Aco022956	15.312	14.8627	14.1371	24.7467	15.3052	15.4132	203.823	192.254	252.398	138.032	141.246	138.588	32.5216	41.8005	48.5921	131.742	76.0207	93.9137	370.38	310.068	279.416	741.779	594.572	0.319375	0.155362	0.344183	7806.4	522.303	3.90199	4.93e-138	1.53e-135	5286.08	550.789	3.26307	1.42e-249	1.26e-246	7288.99	609.742	3.57936	3.97e-67	3.57e-65	4954.77	640.978	2.95027	6.58e-61	3.2e-59	4398.39	6703.33	-0.608016
Aco011788	44.6218	33.2681	29.1832	34.5322	49.3079	41.5738	90.2147	76.377	69.9202	103.37	109.983	126.425	63.7084	64.6579	67.356	59.0587	44.2057	47.5141	86.6604	83.7998	86.7303	2937.9	2516.81	0.223084	0.290178	0.513298	4981.78	2209.57	1.17288	8.75e-09	4.06e-08	7526.31	2329.53	1.69192	3.71e-20	3.27e-19	4651.88	2414.32	0.946357	2.47e-08	1.22e-07	7053.46	2538.76	1.47448	6.91e-23	8.46e-22	6261.09	4278.59	0.549368
Aco014341	62.0347	67.659	69.0767	64.5371	67.4695	64.2418	72.3264	62.7377	71.9675	65.4861	61.3954	64.4206	82.0839	82.9939	89.0485	76.594	77.823	86.8686	94.7914	85.9399	90.6348	4007.89	4069.78	-0.0222925	0.817741	0.911413	3803.73	3575.92	0.0891195	0.471675	0.589355	3693.73	3771.5	-0.0301126	0.75851	0.816723	3551.74	3293.7	0.108955	0.356241	0.460245	3462.45	3463.17	-0.00014798	0.998681	0.999121	3073.88	3266.61	-0.0877831
Aco008135	70.4825	75.2163	75.9132	93.9051	81.9429	87.8131	90.1154	92.5144	103.671	107.872	101.492	100.937	63.1907	64.0088	71.9567	82.7372	80.6467	87.2156	79.277	76.7312	78.9533	4835.7	4075.81	0.246766	0.0164183	0.0669133	4724.45	3581.07	0.3999	0.000626762	0.00160388	5381.11	3776.84	0.510765	2.03e-08	8e-08	4411.32	3973.89	0.150696	0.213961	0.306325	5044.34	4178.2	0.271665	0.00471568	0.0104208	4478.26	4056.64	0.142516
Aco004901	121.475	113.549	148.906	201.94	116.361	138.191	50.4198	40.8545	45.8758	29.1918	27.1764	35.682	66.5915	69.2732	65.9489	110.259	125.154	98.4921	166.152	122.375	92.0811	7136.89	6020.9	0.24532	0.266171	0.487098	1929.88	5288.14	-1.45442	4.47e-19	4.65e-18	1361.69	5578.65	-2.03501	7.46e-35	1.32e-33	1802.06	5865.83	-1.7028	5.06e-17	5.39e-16	1276.22	6166.47	-2.27292	2.8e-31	5.11e-30	1132.97	1657.49	-0.549275
Aco010157	272.097	308.319	257.647	372.902	321.264	322.823	150.916	162.778	125.405	203.771	190.936	191.066	177.518	182.158	166.978	153.523	167.205	176.289	190.873	132.141	132.255	7342.27	6067.67	0.275199	0.0286066	0.102627	2850.91	5332.24	-0.90342	5.42e-09	2.57e-08	3998.66	5622.64	-0.491565	1.36e-05	4.03e-05	2662.04	6034.19	-1.18085	7.88e-17	8.25e-16	3748.41	6344.26	-0.759149	1.24e-13	8.53e-13	3327.77	2447.92	0.443291
Aco023642	51.2248	54.7895	49.3065	59.8972	68.0649	59.4762	58.1762	60.2013	57.6764	69.3944	69.8796	61.9187	45.8519	46.1695	43.0459	39.9805	40.4452	40.3076	42.2618	41.7491	41.3873	5485.53	4557.65	0.267225	0.0174362	0.0702149	4633.67	4004.61	0.21061	0.0433673	0.0778847	5565.86	4222.95	0.398579	0.000155997	0.000403477	4326.63	4508.24	-0.0591154	0.605186	0.694183	5217.49	4740.23	0.138748	0.195283	0.286788	4631.74	3978.74	0.21937
Aco018477	77.6945	75.6829	74.7579	71.0548	72.6589	73.9914	88.3725	84.1644	94.7011	83.8113	89.6825	103.646	61.9742	60.8448	63.0686	70.0775	76.196	73.7005	60.4401	63.4629	54.9066	4455.91	4682.93	-0.0716381	0.405966	0.62658	4920.77	4113.72	0.258558	0.0154431	0.0306903	5365.35	4338.28	0.306412	0.0110109	0.02158	4594.69	3661.66	0.32755	0.00270174	0.00649065	5028.21	3850.12	0.384966	0.000544241	0.00140843	4463.33	4225.52	0.078784
Aco013496	233.919	236.446	229.623	248.663	242.327	237.587	182.572	201.813	186.796	285.768	275.563	231.713	197.175	220.92	217.987	218.928	239.536	253.614	235.152	189.23	216.169	4830.51	4654.19	0.053634	0.525252	0.725366	3406.05	4088.82	-0.263527	0.00952543	0.0197872	4970.14	4312.02	0.205113	0.0791819	0.128131	3180.32	3969.75	-0.319815	0.00282363	0.00675983	4659.48	4173.92	0.158984	0.150571	0.229987	4136.58	2924.45	0.50041
Aco014608	36.7433	36.4656	36.7349	32.6977	38.1681	37.1345	52.6285	44.0595	52.2642	38.2486	36.8976	41.3313	57.7882	52.8967	58.9764	66.6777	65.5284	65.2234	54.585	53.4952	52.1123	3399.34	3469.95	-0.029789	0.784783	0.892504	4217.66	3048.28	0.468475	0.000184377	0.00051149	3466.47	3214.79	0.108541	0.260511	0.358907	3938.26	2793.37	0.49566	0.000223934	0.000652295	3249.14	2937.24	0.145581	0.184776	0.273742	2884.4	3622.19	-0.328728
Aco011327	102.749	93.1388	138.164	60.7597	65.7471	78.3308	34.2335	31.7592	48.9539	21.7434	16.1192	21.8776	152.462	156.109	201.261	44.9354	57.9778	62.8737	40.4084	34.607	51.1434	4047.34	6617.52	-0.709296	0.000143403	0.00138074	2044.16	5811.6	-1.50726	8.76e-11	4.94e-10	1115.94	6131.73	-2.45832	9.42e-36	1.73e-34	1908.64	3325.25	-0.800679	2.74e-05	9.21e-05	1046.18	3496.65	-1.74133	9.45e-29	1.54e-27	928.939	1755.29	-0.918648
Aco015487	87.8657	99.8792	121.023	138.452	73.6904	126.69	189.78	292.041	179.217	285.848	234.375	229.22	140.18	142.083	123.124	222.751	169.52	182.795	186.426	241.173	230.747	2980.35	2723.71	0.13012	0.596071	0.776455	5229.39	2393.21	1.12759	1.13e-06	4.18e-06	6233.72	2524.7	1.30388	1.1e-15	7.57e-15	4882.72	2448.72	0.995354	6.3e-05	0.000200993	5844.74	2574.49	1.18247	7.75e-09	3.57e-08	5189.55	4488.61	0.209417
Aco007712	175.654	179.321	170.888	240.901	209.549	193.568	259.994	279.592	240.948	280.628	314.687	277.974	196.854	191.171	212.006	228.439	256.47	233.187	231.448	226.106	213.127	4324.53	3541.39	0.288183	0.0187098	0.0740704	4713.93	3111.29	0.599398	8.11e-08	3.4e-07	5545.54	3281.07	0.7573	1.03e-13	6.22e-13	4401.59	3554.37	0.308453	0.0208595	0.0410598	5197.73	3736.92	0.47619	5.91e-05	0.000176199	4613.73	4047.56	0.189035
Aco012425	155.575	106.573	125.809	73.753	120.629	96.8277	96.0269	86.0506	156.076	105.229	83.649	98.7053	177.905	197.709	238.674	179.135	243.052	270.182	213.764	178.653	260.06	2777.91	3712.42	-0.418609	0.0599495	0.176871	2902.63	3258.51	-0.166707	0.528195	0.642342	2592.24	3436.4	-0.406817	0.0197534	0.0368946	2710.16	2282.84	0.247929	0.314354	0.416986	2430.24	2400.58	0.0180114	0.920322	0.944576	2157.8	2492.44	-0.208323
Aco012627	37.2272	38.0517	28.3894	44.3237	63.2904	57.51	205.376	205.426	265.105	214.836	206.031	193.016	44.9736	37.8323	46.9291	110.837	75.8438	89.9576	191.101	162.41	209.658	2217.25	1395.98	0.667617	0.000540286	0.00423477	8164.35	1226.54	2.73513	2.33e-48	9.36e-47	7790.81	1293.11	2.59146	5.27e-70	2.71e-68	7623.14	1821.96	2.06518	3.8e-32	1e-30	7303.36	1915.91	1.93089	4.22e-42	1.17e-40	6483.7	7010.32	-0.112751
Aco016764	203.074	286.278	289.939	302.412	245.364	277.401	29.3882	29.9451	33.24	19.1947	22.142	23.7424	204.895	174.46	148.338	33.4887	47.467	38.4713	44.0593	38.1977	43.9452	9636.14	9120.71	0.0793501	0.644498	0.807843	972.704	8018.04	-3.04293	1.15e-62	7.33e-61	719.002	8457.55	-3.55656	1.24e-87	9.47e-86	908.237	7918.69	-3.12373	1.56e-123	4.68e-121	673.797	8325.71	-3.62795	6.89e-178	3.05e-175	598.065	835.217	-0.482841
Aco018902	299.337	307.506	289.168	300.979	196.015	293.514	67.0753	66.7553	83.3578	44.0356	39.9453	38.9668	242.679	228.81	281.016	203.264	263.067	276.737	111.787	82.5031	96.7578	6223.65	7077.14	-0.185198	0.305524	0.530186	1539.14	6217.73	-2.01376	7.68e-46	2.82e-44	915.408	6556.94	-2.84007	1.15e-171	4.03e-169	1437.12	5113.55	-1.83106	2.7e-22	4.25e-21	858.171	5376.41	-2.64738	8.45e-57	3.64e-55	761.896	1321.6	-0.794902
Aco017433	87.9997	64.8981	34.849	36.3294	76.1745	44.2725	38.7541	24.6117	19.4602	23.3981	25.7311	34.9853	196.798	191.767	222.727	24.411	40.2868	27.5334	26.7914	31.1292	30.7928	3635.07	4368.5	-0.265251	0.453701	0.669478	1725.9	3835.25	-1.1521	0.00135762	0.00330069	1843.94	4041.59	-1.13221	0.000228091	0.000578117	1611.74	2987.94	-0.890583	0.00237451	0.00576169	1727.81	3142.04	-0.862644	0.000523606	0.00135772	1533.64	1482.82	0.0488393
Aco007971	58.1441	54.1832	57.2717	34.3631	37.5771	39.0437	94.8735	92.6312	103.239	102.318	101.877	105.386	69.3309	70.2416	79.9244	140.042	128.625	142.139	132.211	127.331	121.761	1886.62	2891.35	-0.615917	1.66e-08	5.25e-07	4446.11	2539.61	0.807975	1.67e-13	1.17e-12	4976.03	2678.39	0.893434	5.24e-24	5.76e-23	4151.47	1550.25	1.42115	1.69e-32	4.51e-31	4664.14	1630.09	1.5165	1.96e-54	8.04e-53	4140.48	3817.84	0.116875
Aco010953	543.596	612.419	573.203	582.479	641.593	661.3	991.958	1141.29	1513.96	1917.06	1919.49	1462.3	554.663	706.521	578.115	985.581	861.299	947.379	928.359	988.399	1288.05	3017.03	2774.28	0.121158	0.276819	0.498664	5251.47	2437.88	1.10728	5.43e-09	2.57e-08	8014.41	2570.99	1.64044	5.87e-30	8.46e-29	4903.22	2479.13	0.984057	1.19e-08	6.11e-08	7513.58	2606.81	1.5273	1.03e-30	1.83e-29	6670.21	4508.59	0.564943
Aco001471	105.33	75.057	85.745	92.5673	108.466	97.4565	111.757	102.003	124.614	97.2021	91.6747	98.1667	112.017	114.385	118.993	88.1449	100.62	96.271	171.541	153.724	157.541	4113.3	3679.67	0.160546	0.327221	0.552189	4194.78	3230.05	0.377043	0.0312992	0.0582694	3739.55	3406.35	0.134514	0.372421	0.482165	3916.81	3380.34	0.212806	0.1134	0.180514	3505.31	3554.36	-0.0198146	0.850206	0.894444	3111.9	3602.21	-0.211279
Aco010411	36.1697	43.6463	40.2255	53.1391	44.7286	51.2632	87.558	90.7285	81.0605	110.467	115.548	108.46	46.2073	48.6019	45.211	57.7586	54.2998	57.3116	67.0991	56.0233	63.5732	3589.66	2897.12	0.309549	0.0163881	0.0668297	5615.37	2546.22	1.14109	5.34e-19	5.52e-18	7613.91	2685.28	1.50373	2.36e-40	5.25e-39	5243.32	2949.76	0.829563	8.72e-12	6.08e-11	7136.72	3101.45	1.20199	6.17e-32	1.17e-30	6335.23	4821.73	0.393971
Aco009913	89.1576	93.5407	100.594	91.7241	101.82	103.443	83.7791	83.626	87.5053	75.6162	70.6804	78.8759	103.609	105.511	111.231	78.6784	76.6922	78.0533	114.13	106.671	116.167	4760.32	4552.5	0.0643227	0.554406	0.7475	3675.26	3999.66	-0.122024	0.253643	0.359487	3412.55	4218.6	-0.306113	0.00378278	0.00801897	3431.72	3911.65	-0.188775	0.0909694	0.149952	3198.74	4113.11	-0.362848	0.000395053	0.00104368	2839.75	3155.88	-0.152483
Aco029197	81.2311	83.693	75.1922	111.381	119.81	99.6242	60.1453	55.5612	44.9075	64.914	58.8874	77.9706	88.1634	81.1634	78.2106	78.1519	77.0843	64.3433	64.397	62.1571	52.5425	6537.44	4758.18	0.458198	0.000127096	0.00124271	2854.01	4180.47	-0.550874	0.000336432	0.000899821	3770.57	4408.31	-0.225576	0.110021	0.171106	2665.01	5373.16	-1.01177	1.89e-11	1.28e-10	3534.01	5649.45	-0.67685	5.92e-07	2.24e-06	3137.39	2450.98	0.356306
Aco015461	445.649	492.297	447.112	569.47	579.446	515.483	409.819	463.462	462.998	695.58	692.585	576.435	444.705	532.413	472.89	434.789	463.32	451.934	473.481	489.763	522.951	4933.9	4116.72	0.261139	0.0150208	0.0623645	3562.89	3617.43	-0.0216839	0.85656	0.899031	5504.99	3814.76	0.529369	1.42e-05	4.19e-05	3326.73	4055.04	-0.285308	0.0175646	0.0352384	5160.72	4263.54	0.275849	0.0165164	0.0327052	4581.43	3059.02	0.582726
Aco007079	140.233	137.974	90.1625	88.1052	116.361	85.4625	619.962	535.43	770.163	333.51	528.114	328.412	96.7555	55.0338	40.5918	32.33	21.1818	39.2874	150.422	137.091	149.995	2238.59	2852.81	-0.349956	0.108535	0.267232	13375.5	2506.41	2.41608	5.51e-26	8.4e-25	8688.22	2642.03	1.71756	1.62e-12	9.04e-12	12489.1	1839.96	2.76343	3.25e-52	1.89e-50	8141.6	1934.66	2.07368	7.95e-26	1.13e-24	7224.6	11486.3	-0.668906
Aco014187	0.389558	1.33262	0.313287	0.663673	0.128373	0.485762	485.153	733.605	284.783	454.823	470.611	481.251	5.84405	7.10778	6.44127	397.007	100.868	180.518	835.549	509.822	503.753	8.11079	12.9517	-0.657537	0.505523	0.710465	8584.28	11.4181	9.56492	8.24e-36	2.05e-34	8453.2	12.0288	9.47464	4.3e-62	1.77e-60	8015.49	6.66384	10.2109	1.35e-55	8.85e-54	7923.05	7.00496	10.0899	7.77e-228	7.17e-225	7033.26	7368.43	-0.0671433
Aco015730	182.338	172.911	170.665	205.36	204.249	183.417	192.749	196.999	154.096	252.776	262.272	228.802	269.093	294.509	280.392	267.586	283.425	280.224	346.773	276.507	284.272	3725.85	3313.9	0.168807	0.109025	0.268064	3072.46	2910.93	0.0777084	0.585991	0.688499	4418.35	3069.78	0.525533	3.23e-07	1.14e-06	2868.94	3062.18	-0.0941225	0.503666	0.602995	4141.68	3219.61	0.363731	0.000577282	0.00148803	3676.61	2638.3	0.479129
Aco024252	222.133	281.761	265.164	283.741	258.628	295.043	732.457	820.496	847.515	729.477	757.094	757.92	322.909	345.543	286.577	529.711	456.28	502.226	721.64	688.652	847.457	2498.47	2300.19	0.119649	0.376726	0.60121	6443.08	2021.78	1.67228	2.91e-30	5.61e-29	6333.14	2132.3	1.57062	1.37e-35	2.5e-34	6016	2053.01	1.55081	1.15e-37	3.81e-36	5936.02	2158.65	1.45879	3.53e-53	1.4e-51	5269.38	5531.93	-0.0702876
Aco003334	45.0246	39.7748	42.6219	71.4329	63.7542	56.2987	53.7949	50.6244	68.0918	43.5417	50.1048	58.8083	49.8897	45.5185	43.0192	81.2042	82.7775	82.4848	57.2877	69.1172	61.6719	4963.85	3313.29	0.583021	1.33e-05	0.000184269	4024.25	2909.87	0.467887	0.00375344	0.00843535	3738.91	3068.85	0.284683	0.0533702	0.0906068	3757.51	4079.96	-0.118529	0.462141	0.564966	3503.63	4289.5	-0.292033	0.0434824	0.0779147	3109.82	3455.6	-0.152427
Aco003655	52.3989	58.4104	59.8088	125.245	106.594	99.1024	142.789	133.786	121.739	134.176	142.782	157.315	57.8378	59.6471	62.1457	101.915	100.67	87.6446	208.656	156.944	125.741	4693.98	2426.39	0.951907	1.46e-12	1.11e-10	5081.74	2132.04	1.25295	3.11e-23	4.08e-22	5826.27	2248.68	1.37337	1.13e-30	1.68e-29	4745.13	3858.05	0.298544	0.0302928	0.057197	5460.39	4056.17	0.428878	0.000551954	0.00142739	4847	4363.97	0.151496
Aco002191	45.6986	45.0587	46.1309	43.236	44.7351	47.323	54.3183	50.2907	56.8615	51.0232	50.9972	52.5787	54.3174	53.9606	55.6294	68.6211	59.7424	60.4554	58.1283	59.5455	59.3709	3801.9	3857.6	-0.0208805	0.821562	0.913418	4082.15	3388.76	0.268641	0.0123226	0.02502	4108.02	3573.92	0.20081	0.0154801	0.029517	3811.67	3124.08	0.286983	0.0121949	0.0254856	3850.52	3284.92	0.228996	0.0110338	0.0226545	3418.2	3505.48	-0.0365074
Aco009176	26.8674	28.3124	28.351	21.2767	20.8173	20.7074	142.956	131.502	157.137	145.315	166.285	128.974	18.7652	18.9839	20.5583	161.972	94.1467	132.447	172.384	126.59	120.757	1103.75	1472.06	-0.415505	4.06e-05	0.000477715	6824.75	1293.35	2.39977	2.32e-83	2.55e-81	7321.24	1364.03	2.42431	1.89e-77	1.17e-75	6372.51	907.052	2.81275	9.39e-117	2.44e-114	6862.46	953.71	2.84728	5.76e-123	1.12e-120	6091.36	5860.63	0.0557326
Aco003912	46.476	20.1841	17.7848	30.2909	50.6119	34.2858	152.206	121.524	158.142	138.775	116.373	153.858	115.981	114.804	135.139	166.092	226.615	214.224	214.516	198.353	182.984	1408.04	1037	0.441069	0.227939	0.440328	4747.8	909.183	2.38465	8.47e-12	5.19e-11	4725.16	958.267	2.30185	2.41e-12	1.33e-11	4433.26	1157.29	1.93843	5.77e-21	8.23e-20	4429.15	1216.93	1.86462	3.46e-22	4.09e-21	3932.36	4077.59	-0.0524837
Aco007577	0.290852	0.710251	0.246759	2.03287	1.68099	1.11594	187.831	192.394	144.971	171.894	159.457	197.729	1.13316	2.0994	3.41688	211.254	110.448	141.078	356.083	301.29	233.068	66.7993	17.2892	1.95866	0.000406421	0.00333252	6531.69	15.2274	8.77217	1.42e-168	8.61e-166	6920.25	16.0461	8.78471	7.79e-220	4.17e-217	6099.04	54.9212	6.80414	1.86e-222	3.05e-219	6486.22	57.735	6.82302	1.16e-293	1.51e-290	5758.22	5608.73	0.037992
Aco004906	46.0527	28.6671	28.9264	72.7774	67.9497	67.6872	159.689	128.927	122.391	81.1169	81.0344	84.2385	110.504	118.214	129.371	165.033	202.593	175.539	217.661	151.903	171.821	2733.44	1364.87	1.00196	2.05e-06	3.6e-05	4848.9	1197.72	2.01729	3.33e-18	3.28e-17	3055.85	1262.81	1.27487	3.33e-10	1.53e-09	4527.83	2246.38	1.01107	7.07e-13	5.41e-12	2864.29	2361.88	0.27817	0.00272992	0.00630815	2542.7	4164.66	-0.711692
Aco002077	96.0077	105.213	123.791	74.6757	69.6803	80.1617	108.285	103.004	95.5284	97.2669	98.2643	110.507	100.605	94.1686	84.8441	106.627	82.0428	97.1996	141.312	142.174	120.668	3266.9	4741.14	-0.537195	8.91e-05	0.000926876	4015.84	4165.6	-0.0530017	0.713178	0.793693	4211.83	4394.23	-0.0613595	0.656758	0.741589	3749.81	2684.37	0.481811	5.01e-05	0.000162555	3947.53	2822.54	0.483446	6.83e-06	2.29e-05	3504.24	3448.56	0.0231197
Aco002677	52.0068	49.7331	53.9137	70.9869	85.9196	68.4964	154.191	169.245	154.813	145.573	131.369	137.915	82.4152	84.7489	88.3063	157.615	148.93	145.449	242.135	215.294	225.194	2705.68	1873.32	0.529764	9.08e-05	0.000937692	5162.09	1645.51	1.64922	5.12e-54	2.47e-52	4706.97	1735.51	1.4392	4.95e-49	1.42e-47	4820.01	2223.78	1.11652	1.66e-16	1.69e-15	4412.46	2338.21	0.916803	6.18e-14	4.37e-13	3917.41	4432.24	-0.178129
Aco003572	89.9439	91.4334	95.1572	83.4541	62.4299	75.4185	427.017	423.651	514.554	353.376	391.073	296.85	115.895	109.722	114.069	192.302	141.281	204.901	307.787	272.713	332.37	1546.69	1938.51	-0.325214	0.0232891	0.0875102	8587.03	1703.01	2.33411	3.47e-69	2.64e-67	6882.12	1796.13	1.93801	2.68e-47	7.33e-46	8017.87	1271	2.65681	1.22e-67	1.12e-65	6451.22	1336.31	2.27083	2.75e-54	1.12e-52	5726.52	7373.39	-0.36465
Aco003539	9.01207	11.4293	9.96654	32.1633	19.2191	25.2163	441.444	539.648	554.484	418.796	432.232	425.194	25.6942	24.2224	24.8906	154.341	78.7012	112.631	237.316	276.494	225.043	646.732	257.472	1.33007	1.18e-08	3.83e-07	11667.2	226.316	5.68921	1.78e-260	4.1e-257	10193.3	238.666	5.41837	0	0	10893.7	531.483	4.35624	3.51e-116	9.02e-114	9554.35	558.754	4.09437	1.64e-138	3.98e-136	8481.41	10016.4	-0.240071
Aco021646	97.7572	232.436	179.964	372.478	339.944	298.478	78.3482	70.3269	55.9054	44.1381	37.8724	43.2093	195.733	182.926	265.189	31.578	72.0955	65.2232	41.4086	27.5993	52.2227	10805.9	5460.57	0.984714	0.000372485	0.00308998	1966.62	4805.83	-1.28914	2.36e-05	7.44e-05	1265.49	5068.56	-2.00187	5.25e-13	3.04e-12	1836.4	8881.66	-2.2743	1.12e-45	5.09e-44	1186.31	9337.87	-2.97671	2.07e-130	4.51e-128	1053.25	1688.96	-0.680949
Aco009145	30.5367	29.7135	39.2899	25.3136	29.0132	31.062	48.779	40.8891	54.1971	36.2574	31.3401	39.5999	37.6978	39.0657	42.8844	31.6411	34.0861	35.2497	45.1305	45.3925	46.2689	3341.03	3904.45	-0.224926	0.157558	0.347257	5064.92	3429.53	0.562462	0.00178599	0.0042528	3965.88	3618.06	0.132174	0.411454	0.523191	4729.32	2745.19	0.784743	2.33e-07	1.03e-06	3717.42	2886.66	0.364673	0.00526737	0.0115398	3300.39	4349.72	-0.398493
Aco001649	169.418	91.4269	77.0129	153.262	220.092	154.995	88.8584	93.7232	87.887	72.6523	75.9265	89.0084	135.432	128.54	143.666	74.6472	107.583	60.0456	68.3972	72.1078	71.5636	7220.22	4636.5	0.638961	0.0312108	0.109605	3323.1	4067.22	-0.291504	0.310635	0.424501	3069.77	4287.13	-0.481916	0.0807804	0.130442	3102.89	5934.55	-0.935331	1.98e-08	9.9e-08	2876.93	6240.11	-1.11696	7.14e-12	4.27e-11	2553.78	2853.36	-0.160258
Aco013560	157.038	156.044	140.565	130.668	140.572	127.9	101.15	98.6042	101.034	100.601	94.5675	99.9131	136.962	132.327	128.274	112.817	127.847	129.233	98.4575	91.2327	85.5444	4850.74	5529.05	-0.188925	0.0767637	0.20975	3287.96	4857.35	-0.562868	2.04e-07	8.17e-07	3390.4	5121.99	-0.595197	2.42e-09	1.03e-08	3070.1	3986.48	-0.376623	0.000482676	0.001331	3178.08	4191.59	-0.399138	2.39e-05	7.53e-05	2821.42	2823.38	-0.00106416
Aco013330	25.8542	36.9802	35.272	40.3424	33.9853	36.3833	207.169	202.218	219.388	163.587	159.202	171.514	40.1051	38.1422	40.6525	157.534	106.748	127.155	246.176	224.15	197.776	1438.82	1277.85	0.171399	0.326479	0.551643	7352.23	1123.43	2.7104	5.63e-56	2.92e-54	6075.4	1184.93	2.35827	5.8e-49	1.66e-47	6865.03	1182.42	2.53724	7.28e-99	1.3e-96	5694.6	1243.19	2.19505	1.2e-96	1.31e-94	5055.33	6313.32	-0.320714
Aco001248	18.7401	23.5012	21.6748	21.8124	25.0117	21.8601	29.5826	28.6418	29.2196	20.3612	20.1919	21.1336	22.4716	22.1309	22.728	26.8022	25.3722	24.9076	24.984	26.3187	23.001	4253.58	3967.24	0.100403	0.451841	0.667879	4870.59	3487	0.482195	0.000253925	0.000691107	3611.87	3677.5	-0.0259416	0.833507	0.878565	4547.88	3495.75	0.379863	0.00102255	0.00265995	3385.47	3675.66	-0.118363	0.25023	0.352294	3005.38	4182.43	-0.47686
Aco006128	180.922	191.781	172.385	221.44	222.362	230.409	198.669	244.98	190.655	221.819	239.431	215.901	164.969	202.811	178.917	241.446	240.183	232.109	296.954	218.415	228.21	4589.43	3720.96	0.302877	0.00158265	0.0102658	3882.57	3269.39	0.248013	0.0900936	0.148285	4358.59	3447.62	0.338488	0.00102579	0.00238001	3625.25	3771.35	-0.0571009	0.66974	0.750647	4085.37	3965.44	0.04302	0.638509	0.7239	3626.47	3333.28	0.12175
Aco025425	169.402	167.282	195.353	360.011	346.783	306.686	363.775	382.339	505.74	498.913	582.529	465.277	198.633	213.646	177.46	714.959	576.315	556.005	786.013	619.106	551.56	3648.94	1920.64	0.92542	3.76e-13	3.24e-11	4055.61	1687.14	1.26537	8.76e-13	5.82e-12	5265.61	1779.62	1.56489	2.35e-30	3.45e-29	3786.72	2999.06	0.336771	0.0376629	0.0693788	4935.43	3153.19	0.646682	1.88e-07	7.48e-07	4380.76	3482.18	0.331033
Aco015192	175.026	181.141	186.052	208.371	201.188	203.646	93.5897	105.694	104.525	100.876	90.0112	89.0451	124.789	134.882	129.092	85.6126	95.0565	90.1373	76.8602	73.9358	82.7451	6972.9	6182.64	0.173522	0.0366036	0.123474	3107.49	5431.77	-0.805529	1.81e-13	1.27e-12	3009.17	5728.74	-0.928742	1.17e-20	1.07e-19	2901.52	5730.22	-0.981632	3.12e-19	3.98e-18	2821.05	6024.98	-1.0946	8.7e-31	1.55e-29	2504.6	2668.04	-0.0912545
novel.108	92.1144	91.1928	105.668	111.697	109.455	116.484	136.716	144.57	142.216	151.723	140.033	146.667	113.073	124.67	138.544	135.038	138.767	134.995	156.767	124.594	130.283	3890.23	3338.6	0.220529	0.0442379	0.141515	4389.25	2932.74	0.581583	4.99e-07	1.92e-06	4776.14	3093.47	0.62641	8.93e-09	3.65e-08	4098.37	3196.73	0.358368	0.00049656	0.0013661	4477.18	3361.25	0.413404	3.6e-06	1.25e-05	3974.79	3768.77	0.076719
Aco003890	27.3811	30.6572	31.6663	33.8145	34.9195	38.6054	29.0391	24.8601	30.9984	24.0331	20.7025	23.2012	33.1697	30.8393	30.8707	29.4827	28.933	30.4563	27.2136	30.2365	26.0636	5264.6	4410.91	0.255345	0.0254014	0.0935378	3746.61	3875.84	-0.0488509	0.732721	0.80716	3150.21	4087.94	-0.376004	0.00138815	0.00315362	3498.37	4325.8	-0.30628	0.0222101	0.0434175	2953.14	4548.58	-0.623377	8.22e-09	3.78e-08	2621.91	3217.54	-0.295491
Aco013135	123.359	152.023	166.892	164.34	177.107	175.969	185.922	175.842	248.657	176.001	155.21	168.088	104.722	120.784	118.021	154.547	172.356	244.854	167.098	141.731	200.728	4540.34	3889.53	0.22311	0.117292	0.282822	4820.09	3418.26	0.495879	0.0121498	0.0246975	4141.97	3605.77	0.19994	0.170873	0.250374	4500.57	3731.04	0.270725	0.0882542	0.146007	3882.83	3923.11	-0.0148639	0.879491	0.91658	3447.27	4138.93	-0.264012
Aco002941	263.167	278.923	261.19	386.86	309.324	356.793	191.233	223.581	188.871	199.159	211.031	184.01	259.488	286.649	264.946	332.412	309.522	297.563	450.137	389.851	466.992	5178.04	3961.87	0.386475	0.00163535	0.0105512	2670.2	3481.01	-0.382544	0.00204486	0.00481744	2763.26	3670.96	-0.409493	8.2e-05	0.000219695	2493.24	4255.11	-0.771368	2.47e-08	1.22e-07	2590.16	4473.82	-0.78851	3.4e-11	1.92e-10	2299.27	2292.54	0.00444054
Aco003452	53.0606	26.9685	24.9366	33.6494	44.0758	38.7312	58.2173	49.584	56.4551	36.6935	43.4777	40.3876	90.9679	92.0849	101.74	45.5497	61.9189	44.2652	56.9276	54.4484	56.7474	3177.8	2876.91	0.143462	0.618448	0.79074	4031.5	2523.33	0.675997	0.0208349	0.0402523	3110.67	2659.91	0.225848	0.412682	0.524491	3764.44	2611.46	0.527826	0.000317302	0.000902656	2915.29	2746	0.0865952	0.51838	0.621237	2587.59	3462.28	-0.420111
Aco011952	16.1403	13.815	14.6453	33.9201	30.037	28.2235	165.174	148.062	154.769	130.104	118.743	124.255	10.4319	11.5669	9.77219	103.287	65.7677	85.4629	287.766	211.833	203.057	1523.3	739.384	1.04245	1.12e-13	1.03e-11	6957.54	649.314	3.42131	2.21e-167	1.31e-164	5829.46	684.768	3.08932	1.01e-171	3.57e-169	6496.63	1251.98	2.37568	2.01e-79	2.37e-77	5464.65	1316.3	2.05392	3.67e-78	2.71e-76	4851.5	5974.96	-0.300458
Aco024104	34.1037	34.6863	35.9465	38.4877	37.8324	40.8287	29.0804	25.4441	29.7152	20.4481	19.2379	24.6756	37.1354	35.2223	35.3198	24.2104	24.7616	26.1805	21.7275	21.6904	20.232	5683.37	5095.37	0.157666	0.077586	0.211268	3677.01	4476.37	-0.283751	0.0164226	0.0324216	2953.25	4721.11	-0.677115	2.52e-07	8.96e-07	3433.4	4670.14	-0.44385	0.000185394	0.00054661	2767.9	4910.51	-0.827469	9.43e-12	5.59e-11	2457.2	3157.74	-0.362174
Aco010981	64.2189	69.0364	66.6417	128.631	101.244	96.1299	161.388	153.463	174.617	162.145	166.368	151.15	114.408	120.005	114.668	133.56	110.899	108.797	80.6258	78.7434	69.2794	4198.28	2581.61	0.701535	1.63e-06	2.98e-05	5671.69	2268.32	1.32232	2.11e-31	4.27e-30	5841.17	2392.2	1.28811	2.47e-41	5.64e-40	5295.85	3450.7	0.618056	3.19e-05	0.000106145	5475.34	3627.8	0.593938	6.28e-06	2.12e-05	4860.54	4870.34	-0.00292626
Aco014864	55.8147	60.4913	50.9979	61.5587	57.4403	63.1045	156.561	147.833	149.989	144.179	148.093	174.439	46.73	57.3515	56.0439	153.956	110.141	143.754	286.196	227.465	216.955	2233.04	2057.53	0.118702	0.31776	0.542873	5012.44	1807.96	1.47145	9.09e-34	2.05e-32	5413.42	1906.41	1.50582	1.64e-29	2.31e-28	4680.36	1834.95	1.35051	7.72e-36	2.37e-34	5073.44	1929.36	1.39438	2.6e-34	5.4e-33	4503.63	4304.35	0.0651764
Aco006589	83.1018	93.552	105.595	96.747	86.9115	99.9006	208.242	221.053	243.774	185.45	172.83	173.816	100.317	115.141	117.702	128.939	127.078	121.808	259.253	202.628	198.947	2826.22	2820.31	0.00314645	0.981381	0.992471	6035.71	2478.12	1.28425	9.82e-19	9.98e-18	5014.51	2614.03	0.939711	8.18e-14	4.98e-13	5635.65	2322.32	1.27881	4.22e-25	7.75e-24	4700.71	2441.81	0.944478	1.96e-21	2.21e-20	4173.22	5182.4	-0.312574
Aco018660	172.999	158.294	163.614	139.654	140.87	159.454	248.113	239.357	217.672	228.246	237.785	269.652	151.781	151.014	143.316	161.032	164.749	166.094	195.242	175.313	169.935	3528.66	3981.28	-0.17388	0.117828	0.283719	5086.64	3496.83	0.540514	1.55e-06	5.63e-06	5580.68	3687.79	0.597518	1.6e-07	5.79e-07	4749.68	2899.38	0.711754	3.07e-09	1.68e-08	5230.26	3048.69	0.778311	4.65e-12	2.83e-11	4642.79	4368.04	0.0880053
Aco019385	28.3508	17.9791	20.1044	20.8365	31.4312	31.4381	55.9069	54.083	59.183	40.9175	42.3338	40.7589	49.4362	40.3922	44.501	26.3825	29.8872	29.7428	46.2607	52.3252	63.0031	3128.1	2491.52	0.328199	0.162294	0.353575	5685.94	2186.51	1.37873	3.25e-12	2.06e-11	4380.94	2305.62	0.926012	4.43e-07	1.54e-06	5309.16	2570.09	1.04674	2.19e-09	1.21e-08	4106.36	2702.75	0.603503	0.000181539	0.000503619	3645.22	4882.52	-0.421668
Aco014396	113.91	121.225	125.9	124.272	147.611	149.336	273.632	325.597	302.577	296.064	317.38	253.673	127.497	122.99	124.291	161.99	158.228	163.183	208.622	209.886	238.054	3248.87	2791.73	0.218704	0.0769644	0.21011	6255.24	2452.82	1.35064	2.58e-28	4.46e-27	6322.28	2586.99	1.28924	5.69e-25	6.54e-24	5840.61	2669.58	1.12957	2.04e-17	2.25e-16	5926.48	2807.14	1.07821	2.47e-17	2.19e-16	5260.87	5370.39	-0.0296637
Aco004868	59.2856	81.8305	77.9105	97.1656	95.1275	93.5122	137.822	162.838	108.417	135.676	152.211	145.508	46.0211	39.7132	30.2779	102.975	71.1919	67.6311	209.146	157.186	132.913	4070.97	3126.57	0.380807	0.0106409	0.0479456	5238.59	2748.57	0.930461	6.76e-06	2.28e-05	5838.15	2898.97	1.01002	5.7e-11	2.82e-10	4891.52	3345.54	0.547947	0.00063213	0.00170343	5471.71	3517.62	0.637443	6.47e-12	3.89e-11	4856.88	4497.72	0.110967
Aco000434	78.7814	104.953	94.2458	136.861	143.692	136.037	169.144	184.949	185.453	175.539	170.787	156.97	80.2018	88.4869	90.3441	128.91	116.303	124.21	135.616	141.514	148.796	4622.77	3091.6	0.580434	2.22e-05	0.000283606	5385.18	2717.73	0.986743	6.57e-11	3.76e-10	5279.64	2866.2	0.881476	3.59e-10	1.65e-09	5028.26	3799.02	0.404639	0.000167949	0.000499254	4949.28	3994.5	0.309491	0.000946237	0.00236186	4393.77	4623.75	-0.0735981
Aco006057	54.3433	64.2101	68.4196	78.8597	69.4107	79.1189	71.0652	66.9437	65.3164	58.3668	68.3551	66.3818	67.5458	69.1114	70.4438	73.4011	68.6174	77.9543	93.9853	85.678	86.8512	4550.6	3751.17	0.278822	0.0347452	0.11874	3660.51	3296.45	0.151026	0.267974	0.376209	3655.55	3477.07	0.072129	0.600843	0.694469	3418.01	3739.33	-0.129931	0.260683	0.358957	3425.89	3931.69	-0.198962	0.0737453	0.124406	3040.82	3143.43	-0.0478282
Aco011791	190.365	216.875	181.412	375.98	298.816	259.439	456.911	369.18	411.593	433.397	482.108	342.609	186.186	194.012	151.933	397.995	322.411	395.257	491.778	466.997	734.102	3914.51	2473.5	0.662327	0.000109112	0.00109293	4666.09	2173.73	1.1022	7.76e-14	5.6e-13	4984.02	2292.12	1.12091	3.74e-12	2.04e-11	4357.04	3217.73	0.437371	0.00930278	0.0199706	4672.12	3382.79	0.46607	0.00583624	0.0126795	4147.28	4007.51	0.0496545
Aco011534	34.3353	36.6695	35.8373	34.1251	37.6453	34.5239	62.2438	51.4621	50.0659	39.0636	39.1082	46.0014	50.4202	45.9333	47.692	47.6695	44.744	39.05	54.0568	48.5707	47.4277	3496.88	3524.06	-0.0114225	0.908398	0.958332	4845.84	3096.34	0.646081	2.04e-06	7.3e-06	3863.17	3265.48	0.242325	0.0373162	0.0657434	4524.94	2873.78	0.654975	1.05e-06	4.29e-06	3620.67	3021.68	0.260938	0.0209236	0.0404278	3214.1	4161.9	-0.372827
Aco015308	28.1094	31.8086	32.6567	34.8629	35.7454	39.6495	50.1585	45.5091	48.2994	41.9098	35.3919	46.7486	38.2103	37.0648	37.2543	42.7876	36.715	42.1871	50.5531	46.8126	45.7235	3957.99	3331.65	0.248669	0.0328433	0.113787	4649.21	2927.58	0.667249	3.12e-08	1.37e-07	4210.98	3087.77	0.447438	0.00194966	0.00433638	4341.21	3252.19	0.416492	0.000310706	0.000885083	3947.15	3419.67	0.206646	0.109585	0.175425	3504.39	3992.57	-0.188301
Aco017757	83.5938	62.7552	71.6635	51.8386	60.7797	62.6047	169.217	170.377	260.265	168.166	175.2	170.53	86.366	96.2895	95.0226	190.775	151.549	184.564	141.158	138.361	170.851	1967.45	2455.92	-0.320016	0.0447984	0.142763	6061.33	2156.09	1.49126	1.72e-11	1.03e-10	5455.76	2273.84	1.26249	1.07e-20	9.76e-20	5659.41	1616.63	1.80779	3.08e-21	4.51e-20	5113.73	1699.93	1.58888	4.81e-48	1.59e-46	4539.43	5204.4	-0.197393
Aco005160	42.2265	28.6166	39.3231	27.227	22.019	30.6073	62.226	65.5596	134.008	60.5547	53.3024	54.8277	56.1674	64.2349	71.2952	116.525	123.892	154.183	101.268	85.9094	118.609	1594.2	2207.31	-0.469134	0.0197188	0.0771461	4706.95	1937.37	1.28073	5.27e-05	0.00015857	3184.34	2043.51	0.639706	0.000168093	0.000432671	4394.64	1309.77	1.74631	1.06e-10	6.64e-10	2985.24	1377.19	1.11512	1.85e-15	1.46e-14	2650.39	4041.16	-0.608636
Aco007787	153.281	157.844	169.62	191.956	185.038	168.41	198.803	215.135	250.378	369.884	359.118	262.679	167.474	188.986	184.609	224.228	219.125	246.553	227.23	216.436	279.088	3583.95	3167.49	0.177894	0.101634	0.254781	3927.34	2782.73	0.497186	0.00035984	0.000957093	6158.7	2935.02	1.06933	1.2e-11	6.3e-11	3666.99	2945.56	0.316395	0.0208224	0.0410057	5774.21	3096.97	0.89903	6e-10	3.06e-09	5126.26	3372.01	0.604264
Aco005207	46.6999	68.5188	79.241	45.2355	43.3377	57.0031	24.8638	27.4843	27.3427	24.0526	19.8213	22.3223	46.3141	48.1269	45.4872	25.2156	30.1466	34.7242	25.3774	30.2012	35.9117	5197.59	6956.64	-0.420467	0.0488815	0.152465	2559.6	6115.52	-1.25654	2.93e-09	1.42e-08	2234.51	6451.97	-1.52982	6.51e-14	3.99e-13	2389.95	4270.09	-0.837441	5.82e-09	3.09e-08	2094.84	4490.13	-1.10022	1.78e-15	1.41e-14	1859.96	2197.67	-0.240895
Aco009499	120.783	232.925	207.483	294.988	254.906	294.19	215.52	186.921	147.952	131.746	151.969	163.342	91.1073	84.1747	78.3715	97.6811	109.978	92.5267	162.197	141.501	101.727	7593.59	5057.33	0.586464	0.0118014	0.0517936	4453.47	4448.83	0.00146116	0.995644	0.997289	3804.89	4692.54	-0.302523	0.204752	0.292164	4158.6	6239.81	-0.58567	0.000254687	0.000734844	3565.67	6560.76	-0.87998	1.95e-13	1.33e-12	3164.9	3824.85	-0.273122
Aco007617	188.367	265.863	281.411	375.184	282.886	298.547	71.6553	72.6631	76.1702	60.0283	66.3379	66.9595	242.379	239.883	255.607	112.633	155.326	154.531	56.1148	53.0341	68.9113	7928.02	6110.23	0.375742	0.0492445	0.153111	1644.12	5371.38	-1.70792	1.83e-20	2.06e-19	1515.61	5666.14	-1.90257	3.63e-27	4.65e-26	1535.16	6515.76	-2.08547	1e-47	4.9e-46	1420.45	6850.28	-2.26999	2.65e-65	1.47e-63	1260.86	1411.75	-0.163438
Aco014593	131.913	150.668	138.325	191.578	212.415	196.324	54.8894	62.3309	57.3533	62.9752	56.1036	59.051	80.1659	84.5066	67.202	52.149	57.6961	56.4842	50.5628	54.2611	53.108	9055.71	6365.31	0.508571	1.57e-06	2.89e-05	2368.25	5593.68	-1.23987	9.67e-25	1.39e-23	2540.07	5898.99	-1.21552	2.41e-29	3.38e-28	2211.29	7442.02	-1.75067	2.8e-52	1.63e-50	2381.18	7825.05	-1.7163	2.12e-67	1.24e-65	2114.05	2033.34	0.0561061
Aco027155	52.5521	53.5014	50.7545	26.5173	32.3551	28.3183	201.746	243.836	205.191	246.585	252.747	229.04	90.168	104.717	127.898	154.962	137.63	131.804	121.653	134.647	143.248	990.534	1786.17	-0.851439	2.93e-11	1.71e-09	6647.29	1569.23	2.08282	1.7e-59	9.81e-58	7822.05	1654.85	2.2411	1.36e-124	2.27e-122	6206.72	814.033	2.93148	1.79e-96	3.15e-94	7332.18	855.948	3.09992	1.06e-164	4.1e-162	6508.89	5706.95	0.189748
Aco020124	30.0578	50.6171	36.6447	56.6463	56.7814	60.3674	66.7594	70.8175	62.9832	70.1704	79.0614	80.7684	66.1739	71.9143	70.6207	92.3883	86.811	83.061	92.4269	84.0268	73.647	3639.13	2461.57	0.564248	0.0042659	0.0231475	3777.04	2165.21	0.802924	0.000160557	0.000449197	4555.14	2283.12	0.996672	7.5e-07	2.54e-06	3526.78	2990.36	0.237821	0.0310027	0.0584183	4269.01	3144.29	0.44093	1.42e-05	4.61e-05	3789.29	3243.14	0.224543
Aco021806	160.58	217.081	204.54	305.375	399.319	310.943	359.677	386.43	216.165	298.803	309.876	339.016	183.078	218.291	212.232	211.741	209.479	194.341	219.802	185.506	174.061	5849.59	3359.71	0.799866	3.95e-06	6.38e-05	4980.56	2953.43	0.753842	0.00218531	0.00512421	5160.69	3114.97	0.728343	1.15e-06	3.82e-06	4650.74	4807.69	-0.0479082	0.824467	0.874728	4836.78	5055.2	-0.0635134	0.635011	0.721041	4293.55	4276.7	0.00580951
Aco018071	46.388	40.8812	42.2578	36.6362	45.0023	43.9457	35.9892	25.2397	25.1596	21.7394	19.7028	24.8309	49.8431	46.2297	47.9013	25.1499	29.5877	30.006	43.4466	37.8216	42.8503	4826.86	4993.1	-0.0489286	0.710567	0.850075	2986.41	4385.16	-0.554422	0.00271309	0.00626419	2408.51	4624.53	-0.941468	6.72e-13	3.86e-12	2788.73	3966.3	-0.508364	0.00394607	0.00915677	2257.49	4170.68	-0.885759	3.08e-11	1.74e-10	2004.15	2565.36	-0.356085
Aco026570	19.657	21.5641	23.599	31.4092	23.4139	30.7784	315.228	313.575	337.997	202.739	220.698	148.16	12.745	151.223	13.0592	184.038	83.9053	187.152	731.332	516.424	666.288	629.122	477.722	0.398169	0.0263398	0.0962719	6393.79	419.745	3.92859	4.27e-210	4.1e-207	3971.96	442.741	3.16519	1.07e-68	5.31e-67	5970.08	516.936	3.52781	1.14e-129	3.93e-127	3723.62	543.515	2.77513	3.96e-56	1.67e-54	3305.42	5490.21	-0.731844
Aco001442	89.3095	81.038	84.0618	73.1401	84.6904	83.2633	161.466	128.243	147.833	124.7	132.213	131.319	106.221	104.956	114.601	119.318	133.316	124.03	118.892	116.926	130.895	3051.81	3229.76	-0.0818897	0.481314	0.690855	4982.4	2836.7	0.812564	3.61e-09	1.74e-08	4646.79	2991.61	0.635199	3.24e-11	1.64e-10	4652.39	2507.77	0.891601	1.13e-10	7.07e-10	4355.32	2636.94	0.724007	2.33e-12	1.45e-11	3866.12	4279.22	-0.146426
Aco014266	127.92	93.0527	118.932	69.9629	76.6159	76.6681	80.6575	74.284	68.2624	46.3201	47.8636	54.412	87.0232	81.8444	72.1452	38.3309	48.2969	48.7684	54.8459	42.9105	56.8445	4433.41	6771.9	-0.611235	6.7e-05	0.000730975	3986.52	5944.67	-0.576627	0.000474931	0.00123987	2790.79	6270.06	-1.16803	7.86e-14	4.8e-13	3722.47	3643.11	0.0309494	0.797518	0.853833	2615.57	3830.69	-0.550711	4.73e-07	1.81e-06	2321.8	3423.51	-0.560269
Aco002381	53.5867	54.4982	59.1544	57.4488	54.8676	59.4825	62.392	64.6001	74.9542	64.3559	59.6973	59.0671	72.5689	77.8023	89.4315	76.4726	82.2131	83.4744	81.4137	72.2856	77.9148	3537.49	3453.09	0.0349235	0.724994	0.858712	3741.29	3033.55	0.302646	0.0203027	0.0393065	3564.89	3199.58	0.155924	0.116359	0.179493	3493.3	2906.86	0.265203	0.033774	0.063005	3341.87	3056.44	0.128646	0.169776	0.255033	2966.88	3212.4	-0.114888
Aco011524	201.448	220.131	218.555	240.103	190.689	218.775	557.826	563.66	508.444	599.834	547.331	598.436	241.861	249.918	266.291	490.513	409.114	446.248	813.235	624.213	627.072	2261.53	2235	0.0174097	0.892978	0.950573	5104.86	1963.82	1.37816	1.81e-35	4.43e-34	5747.34	2071.16	1.47245	1.67e-48	4.75e-47	4766.64	1858.45	1.35845	4.05e-25	7.47e-24	5387.5	1953.97	1.46272	2.27e-36	5.15e-35	4782.98	4383.48	0.125896
Aco001506	190.27	204.394	197.739	237.101	267.404	229.07	190.035	195.501	188.476	214.724	232.341	218.573	221.779	231.833	243.627	194.679	223.081	186.638	167.082	144.832	131.404	5047.21	4086.35	0.304435	0.00572507	0.0292991	3551.82	3590.44	-0.0155552	0.873067	0.911786	4330.16	3786.53	0.193625	0.0400848	0.0701164	3316.46	4148.11	-0.322568	0.00589164	0.0131845	4058.59	4361.53	-0.103517	0.324205	0.434417	3602.68	3049.82	0.2404
Aco014605	71.9662	74.4877	67.1361	103.18	109.915	89.1529	51.048	50.8552	59.6431	49.4873	52.5019	50.1611	61.369	64.4505	62.1137	50.3186	57.2519	53.4056	35.7106	44.426	35.9378	6847.15	4851.97	0.496813	6.99e-05	0.000756263	3292.17	4262.91	-0.372526	0.00389098	0.00871893	3258.94	4495.26	-0.463856	1.89e-06	6.14e-06	3073.97	5627.88	-0.872153	2.92e-10	1.77e-09	3054.6	5917.2	-0.953658	2.33e-17	2.07e-16	2711.52	2826.88	-0.0603318
Aco017958	138.849	138.532	130.042	140.09	165.402	140.544	155.935	173.656	152.129	172.049	171.518	169.528	136.763	151.299	154.714	142.941	152.769	163.356	179.788	146.58	145.822	4130.97	3783.67	0.126447	0.288137	0.510719	4011.68	3323.99	0.27132	0.0164725	0.0325117	4492.4	3505.27	0.358098	3.69e-05	0.00010335	3745.83	3395.04	0.142094	0.271323	0.370518	4210.96	3569.77	0.238728	0.0257316	0.0487236	3738.2	3444.44	0.118144
Aco001051	29.7121	30.7361	37.5383	24.6371	25.4233	29.805	36.9967	31.4509	40.8102	26.9525	26.3116	26.4859	28.4735	28.1923	27.7648	39.6227	40.2093	45.7035	35.2168	35.2151	39.4288	3432.55	4222.16	-0.298622	0.0415574	0.135078	4225.53	3709.15	0.188026	0.258103	0.364708	3240.97	3912.78	-0.271926	0.033732	0.0600216	3945.54	2820.27	0.48429	0.00107756	0.00279147	3037.97	2965.57	0.0344419	0.753237	0.819347	2696.95	3628.82	-0.428297
Aco011205	86.0718	126.814	127.449	107.73	162.853	206.692	3.8569	3.07325	3.20527	2.3672	1.27237	2.03138	124.154	151.326	173.219	19.7412	70.1541	70.3262	4.61454	3.22369	4.19821	8899.59	6357.91	0.485222	0.0561931	0.168883	169.992	5589.74	-5.04035	1.16e-122	2.69e-120	99.9099	5896.21	-5.88394	2.25e-125	3.93e-123	158.735	7310.01	-5.52623	1.62e-127	5.31e-125	93.6922	7687.92	-6.35959	4.87e-145	1.33e-142	83.2146	146.003	-0.811289
Aco013679	19.8641	20.6891	26.7652	26.7958	32.5388	25.6514	195.501	230.264	196.67	225.571	225.973	188.022	155.789	154.994	175.714	767.806	604.748	732.044	772.485	648.29	765.924	409.178	324.829	0.330419	0.104869	0.260799	2694.44	285.358	3.23769	4.85e-79	4.67e-77	2910.25	301.048	3.2717	8.29e-88	6.36e-86	2515.86	336.304	2.90576	4.12e-79	4.82e-77	2728.23	353.609	2.95085	5.67e-94	5.93e-92	2421.97	2313.33	0.0664523
Aco008164	85.5314	93.1911	94.1418	80.2035	94.7386	101.666	97.0058	117.08	111.559	110.771	96.3845	105.375	64.265	57.0677	56.4211	71.153	64.1644	80.3674	83.0839	76.7702	91.1216	4493.6	4444.06	0.016048	0.902035	0.955478	4757.8	3904.79	0.285139	0.0252481	0.0479302	4799.56	4118.3	0.220828	0.0376078	0.0661793	4442.41	3692.14	0.266902	0.0588904	0.103012	4499.34	3882.46	0.212654	0.0815315	0.135773	3994.66	4084.71	-0.0322902
Aco024468	21.7623	21.7368	24.2286	21.6335	20.9903	23.7674	40.4514	31.6648	48.0858	33.6348	32.3646	37.9224	26.4458	26.5511	27.9875	40.3115	36.7133	41.5106	46.2645	43.0927	43.5415	2867.74	2933.58	-0.0325843	0.770739	0.884927	4673.12	2577.04	0.858709	3.75e-06	1.3e-05	4245.37	2718.15	0.642964	4.25e-08	1.62e-07	4363.46	2356.38	0.888876	1.64e-07	7.39e-07	3979.09	2477.69	0.682944	5.82e-10	2.97e-09	3532.39	4013.39	-0.18438
Aco001437	224.632	203.234	206.952	204.47	219.764	210.346	145.943	173.405	112.702	134.68	142.524	146.813	163.756	146.924	125.573	102.978	105.556	80.5321	106.151	105.933	90.3604	5859.87	5879.56	-0.00494783	0.960671	0.984063	3586.52	5164.01	-0.526052	0.00414789	0.0092362	3702.64	5445.88	-0.55674	2.52e-08	9.85e-08	3348.91	4815.56	-0.524149	0.00158336	0.00397934	3470.31	5063.4	-0.545035	3.74e-09	1.77e-08	3080.51	3079.29	0.000733356
Aco018958	105.62	127.191	121.974	164.59	218.114	197.013	114.641	140.07	147.323	159.727	166.282	149.76	142.014	161.229	160.144	114.3	137.083	115.357	90.9755	94.5828	96.6027	5821.83	3570.88	0.705115	2.72e-06	4.6e-05	3631.04	3138.29	0.210601	0.178763	0.268459	4516.49	3309.84	0.448577	0.000161353	0.000416394	3390.3	4784.11	-0.496585	0.00166792	0.00416922	4233.57	5030.65	-0.24865	0.0508587	0.0896103	3758.16	3117.29	0.269554
Aco001270	111.82	132.802	105.665	194.48	197.308	183.722	491.846	520.675	593.198	591.152	700.046	540.323	117.172	131.86	123.619	198.211	182.172	214.057	194.323	203.556	276.371	3000.59	1831.15	0.712751	4.98e-08	1.39e-06	7531.49	1609.41	2.22679	8.98e-48	3.54e-46	9028.95	1697	2.41193	2.95e-56	1.05e-54	7032.26	2465.99	1.5121	1.3e-34	3.74e-33	8462.83	2592.82	1.70687	3.15e-45	9.64e-44	7511.65	6466.69	0.216078
Aco015643	160.204	183.516	179.95	200.301	199.752	201.514	280.726	322.227	281.957	255.466	300.133	247.83	172.512	177.596	173.227	191.552	208.013	185.385	283.183	261.639	264.168	3803.03	3319	0.196436	0.0518033	0.158697	5031.18	2916.6	0.786634	4.3e-10	2.27e-09	4803	3076.04	0.642974	4.91e-07	1.7e-06	4697.75	3125.23	0.587991	1.75e-07	7.85e-07	4501.7	3286.03	0.454242	2.88e-05	8.95e-05	3995.75	4319.66	-0.112343
Aco025715	82.4688	101.923	92.1499	142.137	108.626	129.998	343.622	427.67	340.646	326.313	319.317	291.657	188.62	211.616	192.561	443.564	394.176	400.945	425.929	436.048	451.282	1959.7	1427.14	0.45806	0.00306507	0.0176687	5147.37	1254.36	2.03706	1.05e-37	2.82e-36	4561.67	1322.85	1.78629	2.69e-46	7.1e-45	4806.21	1610.38	1.57709	2.27e-24	4.01e-23	4276.22	1693.15	1.33613	2.06e-26	2.99e-25	3796.24	4419.1	-0.21907
Aco011637	19.4384	26.1499	24.0107	23.4028	25.7728	27.9445	28.8789	25.5154	29.1207	27.2956	23.4679	30.1944	20.6259	18.6147	19.6296	24.8451	22.1106	25.6037	25.1069	27.6281	21.9922	4397.64	3977.62	0.144942	0.33662	0.561278	4284.36	3496.63	0.293199	0.0665067	0.113831	4365.24	3687.76	0.243278	0.133603	0.202401	4000.51	3613.39	0.14677	0.249087	0.346234	4091.73	3799.55	0.106645	0.40659	0.519759	3632.72	3679.29	-0.0185529
Aco001005	49.5835	46.3302	55.4678	41.6741	41.9569	49.879	64.4784	60.0699	74.1125	54.5063	52.9938	55.3793	62.4011	62.2878	70.8488	58.7701	60.4336	61.1832	68.4339	66.2018	74.9775	3169.32	3603.75	-0.18519	0.16926	0.363223	4243.39	3165.25	0.422889	0.00349504	0.00791409	3656.22	3338.74	0.130781	0.239062	0.333752	3962.18	2603.98	0.60544	1.74e-05	6e-05	3427.14	2738.12	0.323343	0.00322274	0.00733448	3042.42	3643.87	-0.260462
Aco002736	258.443	26.3757	25.8801	16.7779	47.6399	24.8467	206.712	124.499	34.4472	168.293	149.784	200.827	137.331	144.921	150.104	145.452	247.542	177.411	928.82	690.801	659.542	578.347	2027.37	-1.80972	NA	1	2127.22	1772.43	0.263203	0.82588	0.875608	3176.45	1867	0.766675	NA	1	1986.7	475.396	2.06334	0.00904049	0.0194349	2977.2	499.945	2.57477	3.75e-08	1.61e-07	2643.11	1828.07	0.531991
Aco003326	40.1846	48.4757	67.1735	57.7009	35.5196	41.2524	20.348	32.4367	25.5749	36.5573	41.2073	33.4428	63.0948	56.7552	38.704	45.3161	49.5674	42.9954	27.9958	28.5281	29.928	4414.76	5128.38	-0.21617	0.370444	0.595193	2314	4506.29	-0.961558	0.000111879	0.000321442	3453.35	4754.88	-0.461443	0.0230268	0.0424335	2160.54	3628.43	-0.747964	0.000598315	0.00161942	3236.92	3814.49	-0.236914	0.178122	0.265731	2873.23	1986.13	0.532667
Aco015555	1.69854	1.53524	1.18875	2.15924	1.19135	1.08815	86.7653	81.5324	170.355	86.8968	106.107	53.3378	5.67915	5.7	7.13957	106.858	45.5649	65.8637	205.171	261.925	246.902	88.1071	88.1164	0.0008268	0.998265	0.9994	6054.94	77.3974	6.29118	1.07e-87	1.29e-85	4623.49	81.5967	5.82624	1.74e-105	2.06e-103	5653.28	72.4354	6.28636	2.03e-37	6.7e-36	4334.45	76.1397	5.83117	4.91e-44	1.44e-42	3847.25	5198.92	-0.434391
Aco025753	123.669	148.581	130.783	153.018	168.975	166.988	218.112	208.818	182.078	216.996	240.844	194.861	58.9192	69.8434	56.1374	78.9265	91.8085	94.356	78.5894	82.4288	110.903	5118.3	4229.12	0.275386	0.0196898	0.0770766	5732.76	3716.93	0.625124	7.87e-06	2.63e-05	6459.13	3919.7	0.72078	7.13e-08	2.67e-07	5353.03	4205.95	0.347837	0.00451178	0.0103511	6054.45	4422.51	0.45329	5.87e-05	0.000175107	5374.28	4922.96	0.126762
Aco009051	117.139	138.985	136.539	180.721	165.379	153.712	95.6148	108.682	99.0481	95.6108	93.7572	91.544	126.709	119.897	139.555	172.609	163.944	149.124	136.559	139.254	117.379	5257.36	4140.59	0.344439	0.00564018	0.0290014	2869.84	3638.83	-0.342459	0.00889844	0.0186089	2793.82	3837.83	-0.457972	5.1e-05	0.000140374	2679.64	4320.93	-0.689196	2.45e-08	1.21e-07	2618.87	4542.96	-0.794506	7.83e-15	5.92e-14	2324.89	2463.99	-0.0838141
Aco013503	81.3564	77.6619	84.6041	42.6157	52.9571	51.5692	132.269	124.259	155.792	136.321	146.713	142.697	90.2299	88.3074	96.5323	165.347	157.73	174.14	157.865	138.436	165.932	1767.1	2933.64	-0.731576	2.84e-08	8.46e-07	4454.76	2576.87	0.789792	1.05e-08	4.83e-08	4834.26	2717.83	0.830646	2.62e-18	2.11e-17	4159.52	1452.04	1.51859	4.78e-24	8.24e-23	4531.01	1526.87	1.56947	2.79e-40	7.21e-39	4022.03	3825.33	0.0721542
Aco010982	87.0807	99.0412	77.4237	91.8799	120.369	103.093	112.037	111.143	123.202	158.808	176.116	177.117	96.9811	99.3478	93.7995	131.994	174.724	150.691	94.4012	95.1911	131.916	3708.83	3107.56	0.255147	0.108601	0.267307	3664.1	2731.01	0.42433	0.00352368	0.00797032	5694.25	2879.53	0.983883	1.88e-13	1.12e-12	3421.27	3047.93	0.167056	0.239446	0.335633	5336.73	3204.94	0.735949	7.71e-09	3.56e-08	4737.1	3146.28	0.590159
Aco001527	337.367	51.3006	38.588	84.9834	110.375	83.5608	125.155	123.566	106.429	129.071	132.077	135.271	254.232	241.36	289.33	64.4443	106.095	60.0346	78.8416	77.1137	79.0931	2954.93	4559.77	-0.625854	0.531932	0.730865	3382.84	3988.5	-0.237621	0.805325	0.859097	3970.26	4201.41	-0.0816477	0.928444	0.947174	3158.75	2428.69	0.379497	0.0149012	0.0304602	3721.31	2553.69	0.543792	4.82e-05	0.000145772	3303.42	2904.89	0.185675
Aco014231	98.3472	96.7943	134.977	109.421	96.0103	108.33	194.659	185.652	207.576	139.509	149.94	147.431	136.806	144.064	143.039	171.593	168.435	197.045	301.96	219.108	252.019	2709.57	2858.21	-0.0771265	0.645723	0.808447	4567.9	2510.56	0.86334	6.23e-07	2.36e-06	3568.28	2648.77	0.429641	0.00780405	0.0156769	4265.21	2226.54	0.937586	3.59e-15	3.31e-14	3344.43	2341.06	0.514136	4.17e-07	1.6e-06	2968.74	3922.51	-0.402049
Aco008540	84.198	87.9331	91.9949	103.259	105.082	101.724	104.192	108.103	107.099	116.567	120.234	105.503	124.967	127.914	120.597	158.769	159.86	150.903	175.114	170.981	167.9	3471.1	2964.67	0.22729	0.0138303	0.0585609	3216.07	2604.65	0.304192	0.00249176	0.0057903	3622.87	2747.13	0.399304	0.000144169	0.000374654	3002.95	2852.55	0.0742937	0.470313	0.572852	3396.03	2999.3	0.179538	0.0654991	0.112177	3014.7	2761.49	0.126688
Aco009295	86.0952	94.6756	92.6418	89.1921	87.3115	85.4385	74.8664	73.4954	83.6695	76.6745	69.0667	71.7165	71.5126	75.3391	71.837	88.2372	91.1831	90.1029	95.4999	90.6233	83.6035	4339.17	4541.15	-0.0656717	0.474934	0.685979	3458.01	3990.23	-0.206335	0.0815261	0.13608	3405.58	4208.26	-0.305264	0.00227364	0.00500185	3228.84	3565.97	-0.143052	0.210376	0.302084	3192.53	3749.38	-0.231851	0.0122221	0.024866	2834.37	2969.34	-0.0672811
Aco011164	58.7986	68.7364	69.9266	68.9629	75.0939	70.1798	197.297	200.347	200.188	188.636	190.352	185.037	67.0893	72.5652	68.398	197.424	147.583	164.397	262.84	230.393	192.429	2175.06	2009.5	0.113923	0.345207	0.569698	5459.14	1765.91	1.62827	2.2e-41	6.8e-40	5413.98	1862.55	1.53941	6.76e-43	1.62e-41	5097.39	1787.47	1.5122	6.88e-46	3.17e-44	5074.78	1879.46	1.43351	1.63e-55	6.77e-54	4504.99	4687.61	-0.0573179
Aco012097	335.32	92.4204	107.79	93.496	132.775	91.7224	160.463	142.555	183.67	138.937	179.492	189.804	207.503	152.051	175.676	175.999	250.652	151.389	113.753	105.171	119.202	2801.79	4744.59	-0.75998	0.2189	0.428962	3856.94	4155.73	-0.107639	0.80281	0.857028	4234.95	4380	-0.0486011	0.934266	0.951552	3601.35	2302.94	0.645598	0.000419726	0.00116968	3968.21	2421.49	0.712989	5.85e-05	0.000174411	3521.86	3312.15	0.0883471
Aco014293	67.1379	73.1138	73.248	87.434	91.1358	80.8382	66.0524	65.4866	66.9881	70.2073	72.8159	78.2756	67.9653	71.658	74.9461	79.2386	80.1842	72.8092	72.6108	73.1213	63.3977	4852.16	4003.68	0.277063	0.00767784	0.0371006	3340.08	3517.85	-0.0747606	0.462687	0.581541	3914.37	3710.16	0.0771623	0.457004	0.568328	3118.76	3987.82	-0.354379	0.00137162	0.00347918	3668.74	4192.91	-0.192548	0.0588111	0.101893	3256.7	2868.09	0.183154
Aco026665	133.562	140.77	147.651	181.092	191.295	181.198	253.149	290.686	220.838	274.472	261.44	259.359	94.3359	100.435	113.437	147.146	152.324	152.71	160.672	149.275	146.02	4414.82	3374.03	0.387638	5.33e-05	0.000603044	5483.13	2964.36	0.887164	8.98e-10	4.59e-09	5995.91	3126.53	0.939369	5.43e-24	5.96e-23	5119.82	3628.12	0.496857	0.000235703	0.000684426	5620.59	3814.8	0.559351	1.38e-10	7.39e-10	4989.78	4707.76	0.0840688
Aco004512	77.3312	82.0772	68.4805	107.412	143.176	114.659	235.132	231.55	195.743	231.951	247.509	241.603	71.269	88.5634	80.1821	138.318	128.376	131.514	280.149	191.729	200.734	3363.93	2104.34	0.676655	1.88e-05	0.000247413	5485.2	1849.01	1.56893	4.89e-28	8.33e-27	6278.27	1949.65	1.6875	7.33e-50	2.17e-48	5121.85	2764.66	0.889809	7.32e-09	3.85e-08	5884.48	2907.03	1.01783	4.6e-15	3.53e-14	5223.51	4710.24	0.149375
Aco019567	54.6215	58.3478	58.3317	48.2608	45.8596	53.1133	72.5103	64.4662	79.4896	54.2624	50.3235	56.3327	69.4431	66.2548	74.1682	68.1347	60.9414	64.974	81.9233	90.9373	91.6009	3105.92	3623.62	-0.222017	0.0381238	0.127065	4108.98	3183.79	0.368157	0.00505167	0.0110668	3210.07	3357.8	-0.0650472	0.517282	0.6239	3836.71	2552.05	0.588067	1.06e-05	3.76e-05	3008.97	2683.43	0.164665	0.121251	0.191431	2671.3	3528.61	-0.401782
Aco007282	63.6399	71.5731	74.2779	87.624	83.2126	91.2775	61.6471	60.148	62.1049	53.3738	52.0297	54.8601	71.2122	76.3139	72.68	58.1047	61.3892	64.8664	49.5901	54.8063	54.1538	5397.11	4324.72	0.319676	0.00317595	0.0182314	3406.47	3800.14	-0.157775	0.170154	0.257073	3120.54	4008.12	-0.361237	0.000797962	0.00188137	3180.76	4434.92	-0.479659	4.54e-06	1.7e-05	2924.99	4663.14	-0.673168	9.23e-14	6.45e-13	2596.64	2925.14	-0.171971
Aco007297	52.8034	49.479	51.0747	61.1242	62.3636	67.0447	108.179	123.902	173.514	127.619	105.515	99.4242	47.2555	55.3841	58.8753	122.597	88.8726	124.111	149.639	131.491	156.529	2791.36	2253.39	0.309028	0.00234459	0.0142109	5347.37	1979.29	1.43397	1.15e-12	7.53e-12	4604.6	2087.41	1.14144	1.29e-18	1.06e-17	4992.73	2293.68	1.12227	7.64e-10	4.45e-09	4317.34	2411.77	0.840033	8.61e-12	5.12e-11	3833.37	4590.91	-0.260294
Aco012637	202.558	207.402	215.952	227.662	204.008	210.071	333.068	358.697	289.475	391.31	410.403	321.808	225.086	236.806	252.363	252.149	287.437	259.644	309.501	243.908	269.405	3290.79	3218.66	0.0320095	0.747086	0.871213	4525.21	2827.68	0.678205	1.22e-07	5.01e-07	5446.86	2982.31	0.869098	1.1e-11	5.78e-11	4225.4	2704.39	0.643606	5.89e-07	2.47e-06	5106.07	2843.42	0.844676	4.02e-12	2.46e-11	4532.71	3885.54	0.222501
Aco001238	51.8304	59.0529	55.4011	74.0673	90.4428	80.8871	55.4737	50.9951	49.0905	60.7438	57.9628	58.563	60.1883	62.3419	64.6055	60.6045	63.5345	60.146	56.76	56.9132	48.8995	5493.55	3731.53	0.557869	7.7e-06	0.000114761	3131.79	3279.13	-0.0663912	0.580449	0.683278	3751.37	3458.2	0.117523	0.240023	0.334875	2924.34	4514.56	-0.626451	1.28e-06	5.17e-06	3516.5	4747.05	-0.432661	7.51e-05	0.000220611	3121.82	2689.47	0.215283
Aco010943	107.799	111.621	105.035	109.189	127.915	140.748	102.687	129.919	79.9879	105.596	108.265	107.335	50.4183	49.1112	39.8673	96.322	99.6526	129.01	136.131	102.37	124.035	5033	4333.69	0.215957	0.0992956	0.250444	3742.77	3807.5	-0.024834	0.898897	0.92803	4045.33	4015.23	0.0108626	0.899766	0.929415	3494.77	4135.24	-0.242945	0.196936	0.286104	3791.75	4348.42	-0.19774	0.0935669	0.153225	3365.96	3213.23	0.0671643
Aco002507	77.2692	83.9851	89.0851	121.491	130.329	124.233	86.9922	93.5781	95.2948	99.0144	90.3787	96.6047	69.0177	73.5332	75.2084	71.413	70.2543	73.1032	91.3503	86.2346	89.4819	5736.64	3828.46	0.583261	1.82e-08	5.72e-07	3785.18	3363.81	0.170318	0.143161	0.221896	4124.64	3547.95	0.217186	0.0411855	0.0718343	3534.32	4714.32	-0.415404	0.000121479	0.000369572	3866.46	4956.94	-0.358347	0.000101627	0.000293084	3432.62	3250.03	0.0786921
Aco015465	126.373	121.239	145.976	120.709	101.773	127.848	11.4333	10.9121	9.70207	8.29909	8.52051	7.5037	102.254	95.1374	75.3604	12.277	14.4479	19.2146	11.2187	11.9762	17.8402	7945.39	8952.33	-0.172056	0.214218	0.423556	653.824	7863.43	-3.58897	2.13e-145	8.03e-143	521.648	8294.62	-3.99042	2.07e-214	1.03e-211	610.515	6528.38	-3.4195	1.71e-130	6.16e-128	488.987	6864.31	-3.81073	3.2e-203	2.15e-200	434.082	561.466	-0.369894
Aco001056	127.978	134.592	155.511	163.033	152.129	151.314	226.218	235.864	245.487	154.479	174.508	166.271	136.119	158.219	160.167	141.997	134.942	151.748	194.439	173.183	183.052	3848.23	3457.92	0.154118	0.195964	0.399803	5251.02	3037.93	0.789432	5.08e-10	2.66e-09	3864.1	3204.52	0.269861	0.0303408	0.0545443	4903.02	3162.54	0.632691	3.97e-09	2.14e-08	3621.54	3325.15	0.123183	0.211763	0.306951	3214.59	4508.76	-0.488197
Aco019197	29.193	36.2319	34.3996	37.6442	36.0347	39.2558	35.9473	32.3024	34.5192	30.4291	32.1116	36.8	63.9452	59.8731	66.5063	81.2133	83.1767	85.5343	68.1788	65.1589	56.9162	3051.19	2703.61	0.17472	0.159829	0.350294	2497.9	2376.25	0.0720843	0.603831	0.704285	2538.71	2506.15	0.0184856	0.896458	0.926872	2332.42	2507.24	-0.104508	0.361006	0.464437	2379.24	2636.26	-0.148501	0.189969	0.280199	2111.98	2145.12	-0.0226828
Aco017289	78.5688	77.4185	80.3147	92.4144	97.1278	101.749	83.8396	93.7393	89.8592	84.3265	77.3897	81.2791	75.4528	73.2538	65.6709	62.533	60.3729	55.7682	83.545	92.5427	85.1411	4928.6	4009.42	0.297809	0.00141595	0.00938239	4069.94	3522.11	0.208607	0.042542	0.0765635	3887.1	3714.61	0.0654013	0.461212	0.572416	3800.19	4049.91	-0.0918047	0.408826	0.511621	3643.8	4258.43	-0.224969	0.0164486	0.0325942	3234.94	3494.42	-0.111407
Aco002717	21.1647	25.4505	24.8034	31.2137	25.6025	28.6708	87.4771	80.0665	83.1788	89.1593	80.6119	91.5433	28.6218	30.8138	32.223	88.0349	68.3386	68.9267	86.9524	81.7453	68.6998	2080.68	1742.8	0.255985	0.0625073	0.182105	5490.36	1531.66	1.84187	1.84e-46	6.88e-45	6014.71	1615.41	1.89662	5.2e-53	1.68e-51	5126.63	1709.84	1.58377	5.11e-37	1.65e-35	5638.03	1797.73	1.64853	1.53e-47	4.99e-46	5005.42	4714.89	0.0862342
Aco006542	146.761	150.794	151.143	177.171	172.087	174.47	123.894	132.03	157.802	209.895	191.637	154.735	141.062	144.13	158.016	152.748	159.876	165.411	159.689	164.695	199.899	4389.31	3770.99	0.219084	0.00819469	0.039074	3119.72	3312.99	-0.0864566	0.535018	0.647776	4406.15	3494	0.334816	0.0159567	0.0303403	2912.91	3607.05	-0.308088	0.0206039	0.0406129	4131.16	3792.61	0.123545	0.333857	0.445143	3667.77	2678.62	0.453334
Aco021526	239.246	233.966	222.301	327.901	339.624	295.788	236.721	300.044	294.365	377.49	356.243	302.898	176.961	195.62	193.482	205.954	225.946	226.83	240.601	202.825	232.503	5117.48	3705.42	0.465627	1.6e-05	0.000214987	3971.04	3255.09	0.287001	0.0429975	0.0772867	5204.94	3432.63	0.600763	6.59e-07	2.25e-06	3707.75	4205.97	-0.181602	0.194193	0.283005	4879.7	4422.23	0.142362	0.232987	0.331918	4332.18	3409.09	0.345661
Aco004941	90.2487	47.8257	43.1434	72.0739	92.9829	66.1665	64.6345	56.3753	53.1268	49.2103	48.0007	65.8449	93.7206	77.338	76.0901	55.9192	80.6384	55.2618	75.7231	76.2271	57.8713	4688.52	3690.21	0.34535	0.227761	0.44018	3174.99	3237	-0.0279361	0.922293	0.945404	3126.59	3412.2	-0.126186	0.653179	0.73837	2964.71	3853.79	-0.37822	0.0219169	0.0429151	2930.09	4052.07	-0.467647	0.00616257	0.0133479	2601.07	2726.73	-0.068175
Aco006605	62.9715	67.0625	64.4795	127.383	125.386	111.738	115.822	131.043	123.916	122.478	123.043	125.184	115.706	125.784	109.095	185.74	165.254	159.305	166.15	175.985	180.304	3894.13	2083.65	0.902026	3.88e-17	6.2e-15	3562.67	1830.75	0.960701	4.21e-18	4.12e-17	3744.72	1930.72	0.955816	1.16e-26	1.45e-25	3326.54	3200.53	0.0559782	0.64245	0.726984	3510.01	3365.05	0.0611175	0.536132	0.637205	3115.91	3058.85	0.026547
Aco000443	43.5066	64.8077	55.0615	63.7068	62.9075	67.6533	59.8178	55.9472	61.5929	46.3959	47.4823	54.5724	67.0426	66.2051	74.2366	59.6958	57.691	63.8427	66.1735	61.642	64.5585	4346.75	3663.42	0.246895	0.132675	0.309122	3570.17	3221.23	0.148509	0.407433	0.527671	3141.62	3397.13	-0.11281	0.517472	0.623966	3333.62	3571.82	-0.0996228	0.363918	0.467146	2944.39	3755.66	-0.351485	0.00100009	0.00248788	2613.71	3065.82	-0.230443
Aco001282	21.3358	22.841	24.0584	25.2837	27.2297	24.7596	45.4524	38.1602	35.6414	29.7224	23.9156	27.7949	17.661	17.1185	17.1523	12.3365	13.1223	13.4492	10.3589	11.3378	10.111	4831.83	4277.48	0.175541	0.0904874	0.234512	6706.57	3758.22	0.835396	4.51e-09	2.15e-08	4813.09	3963.88	0.27998	0.0247417	0.0452781	6262.45	3970.94	0.657258	9.73e-07	3.98e-06	4512.27	4175.25	0.112127	0.329807	0.440538	4006.41	5759.96	-0.523665
Aco012374	0.364364	0.0221589	0.0558146	1.0116	1.12066	0.302898	125.818	111.309	102.37	158.257	126.666	165.285	1.44871	2.42709	1.80133	302.413	123.07	133.673	277.671	193.106	162.609	37.2429	6.81611	2.44602	0.0143714	0.0601894	4667.87	5.9575	9.61131	1.25e-23	1.68e-22	6506.95	6.27688	10.0149	2.41e-25	2.83e-24	4358.72	30.6359	7.16246	1.05e-45	4.81e-44	6099.76	32.2033	7.57501	1.73e-49	6.09e-48	5415.82	4008.8	0.434071
Aco010148	227.152	228.342	203.245	278.242	215.872	242.028	279.248	314.416	253.329	365.151	402.806	313.474	228.742	232.982	238.599	205.873	217.326	193.582	184.205	194.878	209.877	4049.52	3635.18	0.155981	0.255012	0.473588	4190.77	3193.65	0.392016	0.00410419	0.00914952	5625.5	3367.63	0.74046	2.91e-08	1.13e-07	3913.08	3327.89	0.233474	0.109457	0.175417	5273.22	3498.87	0.591744	1.5e-05	4.84e-05	4680.86	3598.2	0.379706
Aco015367	126.406	178.55	109.874	91.619	206.582	84.7047	48.4128	50.1131	42.5468	54.6383	45.2056	29.0083	156.444	134.229	142.151	8.11741	20.3445	19.2574	20.6091	30.9475	20.3827	6482.29	7033.75	-0.117898	0.726186	0.859061	2145.76	6185.2	-1.52733	4.72e-13	3.2e-12	2058.59	6520.42	-1.66303	1.32e-10	6.31e-10	2003.6	5329.83	-1.41144	0.00193663	0.00477699	1930.65	5604.4	-1.53736	0.00283795	0.00653412	1714.33	1842.5	-0.103577
Aco024619	42.4522	43.775	44.9659	50.5473	60.5732	50.9969	176.617	183.259	208.188	168.126	199.905	200.334	44.5882	58.9563	59.0649	134.823	79.2795	77.2789	157.622	154.353	151.043	2077.81	1685.74	0.301036	0.0162552	0.0664981	6548.85	1481	2.14475	1.24e-69	9.58e-68	6889.08	1561.96	2.14084	4.97e-72	2.72e-70	6114.78	1707.66	1.84088	1.42e-41	5.55e-40	6456.01	1795.55	1.84677	7.95e-49	2.68e-47	5730.26	5623.08	0.0270842
Aco003207	158.174	159.041	184.382	188.317	203.298	185.025	159.535	185.83	144.776	196.544	186.214	180.895	194.276	216.881	237.061	178.34	214.224	200.596	189.366	152.69	155.015	4209.29	3670.85	0.197109	0.0888482	0.231609	3216.97	3224.7	-0.00367017	0.980343	0.986253	3889.52	3401.46	0.193325	0.0831598	0.133712	3003.79	3459.31	-0.203685	0.131369	0.20419	3646.13	3637.3	0.00386596	0.967807	0.976625	3236.94	2762.01	0.229116
Aco007436	49.5283	50.3699	47.5389	48.1315	52.1144	43.9538	82.6143	74.7455	64.2982	55.155	49.028	46.85	56.0601	60.5707	66.2149	49.3623	45.1318	42.873	105.428	89.2283	69.9369	3313.99	3397.67	-0.0363158	0.748412	0.872315	4580.92	2985.01	0.617794	7.67e-06	2.57e-05	3280.61	3147.85	0.0598442	0.577817	0.676728	4277.54	2723.74	0.651306	4.64e-06	1.73e-05	3075.62	2863.81	0.10347	0.377479	0.490009	2730.64	3934.08	-0.526493
Aco004855	35.4503	36.0827	38.5963	44.7992	55.4343	49.5526	286.17	350.037	304.285	267.775	255.734	270.973	41.3663	49.6177	50.6465	185.492	129.074	141.906	127.757	134.508	183.186	1509.08	1112.35	0.439356	0.00100624	0.00713048	8519.82	977.208	3.12393	1.67e-127	4.42e-125	7567.02	1030.68	2.87577	7.71e-202	3.48e-199	7955.09	1240.15	2.68186	2.23e-82	2.84e-80	7092.99	1304.02	2.44415	3.05e-106	4.14e-104	6296.86	7314.47	-0.216164
Aco008077	58.4542	63.6385	63.0842	68.3021	61.7753	72.6137	123.76	123.008	117.321	126.831	126.151	135.85	62.3437	61.5413	66.2969	116.002	94.879	104.588	120.727	121.199	113.64	2943.92	2696.98	0.126827	0.259808	0.479533	4756.98	2369.73	1.00531	8.98e-23	1.16e-21	5341.13	2499.24	1.0956	4.47e-29	6.16e-28	4441.81	2418.96	0.876309	3.1e-14	2.65e-13	5006.23	2543.45	0.976355	2.08e-21	2.34e-20	4444.14	4084.8	0.121625
Aco013718	53.4396	70.0254	68.3991	111.364	98.7213	85.6507	358.453	415.87	387.933	276.401	292.076	262.075	86.3415	93.9278	93.1098	189.788	162.188	167.618	232.154	168.493	195.275	2311.73	1503.2	0.620774	0.000192308	0.0017761	8171.57	1321.31	2.62873	5.31e-64	3.58e-62	6138.81	1393.63	2.13923	2.45e-51	7.51e-50	7629.95	1900.13	2.00587	1.32e-46	6.22e-45	5754.17	1997.7	1.52667	4.95e-35	1.06e-33	5107.93	7015.82	-0.457846
Aco006094	208.048	203.025	213.255	213.984	222.004	212.729	182.081	207.269	165.322	245.096	257.353	227.121	230.29	238.743	237.215	185.381	204.501	192.559	191.107	155.403	193.829	4169.36	4023.81	0.0510245	0.561549	0.753017	3205.59	3534.66	-0.141151	0.276645	0.386029	4433.21	3727.89	0.250059	0.0102916	0.0202812	2993.18	3426.38	-0.195068	0.124729	0.195567	4155.52	3602.68	0.206246	0.0303631	0.0564185	3688.85	2752.3	0.422772
Aco016004	84.3473	103.203	79.7346	93.5577	108.986	105.616	255.711	271.689	234.705	208.567	222.668	200.317	66.2147	59.9409	70.9087	101.978	70.1786	83.2998	218.973	177.822	158.443	3092.33	2688.95	0.201822	0.167947	0.361607	6877	2363.52	1.54106	4.33e-24	5.97e-23	5991.74	2492.1	1.26594	2.92e-20	2.58e-19	6421.35	2541.1	1.33748	1.68e-27	3.54e-26	5616.23	2671.98	1.07192	3.81e-24	4.94e-23	4985.43	5904.92	-0.244063
Aco002820	2745.91	2212.85	1021.81	284.865	706.622	509.368	10.298	10.5402	6.73344	6.38113	5.64768	13.3027	77.7235	48.5616	37.8278	3.43186	2.24847	1.63028	0.121636	0.415644	0.302318	4964.16	19849.3	-1.99952	1.28e-07	3.16e-06	81.9302	17430.9	-7.73529	8.79e-104	1.51e-101	79.2538	18367.1	-7.85851	2.42e-45	6.21e-44	76.5045	4079.31	-5.73966	1.76e-81	2.18e-79	74.2487	4290.14	-5.8546	5.72e-27	8.6e-26	65.9106	70.3546	-0.096366
Aco013307	54.4988	57.4635	61.6909	64.4791	60.0319	62.3858	96.5905	88.2	109.159	87.7329	84.1393	91.7149	59.8375	61.5697	68.0626	110.501	96.721	107.349	133.5	111.864	103.182	3028.44	2821.4	0.102146	0.317696	0.542868	4285.88	2478.81	0.790002	9.08e-09	4.2e-08	4038.95	2614.5	0.627229	1.45e-09	6.3e-09	4001.87	2488.71	0.685346	9.29e-08	4.31e-07	3785.83	2616.71	0.532607	9.96e-09	4.56e-08	3360.88	3680.43	-0.131256
Aco009649	42.3837	43.9443	40.5561	83.6265	69.7831	75.0953	32.8553	35.9169	28.7846	31.6373	30.5496	31.1192	42.8299	44.9432	41.3529	44.4113	41.4313	43.5009	40.151	47.3643	39.1134	6817.33	3796.82	0.844597	1.11e-13	1.03e-11	2617.7	3335.85	-0.34987	0.00827658	0.0174033	2632.43	3517.77	-0.418136	4.4e-06	1.37e-05	2444.27	5602.48	-1.19691	1.49e-18	1.79e-17	2467.56	5890.42	-1.2554	8.58e-34	1.75e-32	2190.59	2247.64	-0.0368564
Aco003993	102.235	123.496	111.758	180.648	181.594	172.875	177.175	185.833	152.781	143.591	149.085	138.718	140.524	141.183	127.422	120.165	105.093	97.6814	126.794	109.65	123.778	5242.99	3314.88	0.661485	3.94e-09	1.45e-07	4544.56	2913.4	0.641431	7.06e-06	2.37e-05	3996.42	3072.45	0.379518	0.00101162	0.00235019	4243.48	4308.79	-0.0221071	0.85562	0.898119	3746.01	4530.42	-0.274056	0.0019166	0.0045551	3325.34	3902.25	-0.230581
Aco016502	86.4387	95.8448	97.522	132.095	141.676	120.494	61.9667	51.7222	52.6479	52.7331	54.9269	54.0847	59.9911	59.8425	60.0898	37.7298	36.446	34.8114	54.869	56.9346	49.1167	7537.79	5362.68	0.491004	1.93e-05	0.000252806	2860.37	4712.09	-0.720337	6.85e-08	2.9e-07	2923.83	4969.83	-0.765371	2.47e-14	1.56e-13	2670.93	6195.22	-1.21385	7.35e-20	9.76e-19	2740.51	6513.82	-1.24885	2.35e-34	4.88e-33	2432.73	2456.61	-0.0138663
Aco004360	47.583	45.9231	29.1995	13.3371	104.463	38.0125	1.92829	1.97982	0.434822	0.450703	0.333366	0.674583	127.99	125.534	106.65	44.697	120.771	25.1285	7.51558	16.4757	15.6596	4733.65	3734.41	0.34203	0.663515	0.819768	118.33	3280.82	-4.79585	3.78e-26	5.84e-25	41.8531	3458.23	-6.37695	3.06e-112	4.1e-110	110.502	3891.64	-5.13881	1.25e-07	5.71e-07	39.2233	4093.13	-6.70653	1.35e-16	1.14e-15	34.8245	101.62	-1.54578
Aco010994	39.2652	32.2307	32.6663	29.9448	37.4577	34.2131	55.9733	50.2761	70.3691	52.7182	49.1009	52.3529	51.75	53.0964	65.628	51.1041	52.3145	54.7595	66.0673	64.5523	62.6895	2728.05	2805.11	-0.0403912	0.787265	0.894142	4266.2	2463.19	0.792541	1.11e-05	3.64e-05	3912.71	2597.48	0.590991	1.46e-06	4.8e-06	3983.44	2241.82	0.829661	5.76e-07	2.42e-06	3667.71	2357.3	0.638039	4.81e-08	2.05e-07	3256.11	3663.5	-0.170295
Aco000997	60.7268	68.4661	73.2484	101.408	112.134	95.9804	118.366	117.941	117.024	111.765	128.832	125.351	84.2679	99.7105	92.9538	137.636	141.827	141.353	184.255	157.084	155.828	3635.92	2383.64	0.60877	1.85e-06	3.3e-05	3732.91	2094.49	0.833603	6.14e-12	3.81e-11	4065.19	2209.21	0.87966	3.83e-12	2.08e-11	3485.57	2988.26	0.222428	0.0566203	0.0993759	3809.86	3141.98	0.278386	0.0136958	0.0275583	3381.68	3205.41	0.077198
Aco002171	134.754	142.015	131.525	129.563	159.08	124.091	61.0544	58.6617	61.4062	45.0891	49.2353	58.0953	114.497	112.442	96.2597	67.3565	72.9194	72.3765	61.4695	57.6859	54.8489	6029.26	5979.66	0.0117102	0.930996	0.969025	2379.54	5253.86	-1.14257	4.63e-29	8.34e-28	2105.7	5540.45	-1.39602	1.02e-25	1.22e-24	2221.88	4955.49	-1.15698	5.74e-17	6.07e-16	1973.31	5210.49	-1.40086	2.44e-22	2.9e-21	1751.59	2043.35	-0.222653
Aco020841	87.6199	81.3211	92.3817	89.741	92.9389	90.2687	185.942	201.645	241.447	210.154	190.034	192.593	98.2204	106.92	111.616	159.518	144.815	148.111	208.908	201.281	218.889	2502.5	2402.66	0.0583418	0.57677	0.763569	5188.64	2110.31	1.29792	4.1e-18	4.01e-17	5137.75	2225.83	1.20657	9.74e-31	1.45e-29	4844.66	2056.53	1.23644	1.86e-19	2.39e-18	4816.39	2162.35	1.15558	4.44e-35	9.54e-34	4276.05	4454.94	-0.0593016
Aco000910	56.21	77.3239	66.7551	75.2623	72.3618	77.395	74.2856	67.5099	74.4449	73.3189	72.3765	69.0708	65.4766	60.5925	60.0196	65.8408	58.3179	58.2375	103.088	95.5373	89.8251	4189.22	3737.48	0.164796	0.253435	0.471509	3621.88	3285.79	0.140622	0.381719	0.501418	3780.48	3465.17	0.125804	0.386417	0.496569	3381.92	3442.45	-0.0256777	0.816305	0.868476	3543.77	3619.58	-0.0306261	0.728486	0.799844	3145.96	3110.31	0.0164826
Aco031613	210.807	223.509	156.678	273.902	241.601	267.675	187.617	199.035	69.0022	100.895	116.793	113.193	212.614	193.654	166.449	233.612	172.917	177.571	217.002	222.699	150.021	5556.56	4206.43	0.401828	0.0146856	0.0612067	2905.19	3696.26	-0.347538	0.33469	0.450617	2220.57	3896.68	-0.811204	1.22e-06	4.06e-06	2712.91	4566.09	-0.751217	0.0978991	0.159621	2081.1	4800.93	-1.20622	6.71e-29	1.11e-27	1847.2	2494.76	-0.433484
Aco015286	86.8817	101.274	92.9176	98.0282	117.195	110.949	72.8057	62.7594	57.9277	53.3214	60.695	53.0177	85.9078	86.6172	88.3229	53.2451	57.9728	53.5632	50.629	49.8892	49.7818	5823.26	5030.31	0.211151	0.0870007	0.228579	3106.68	4420.72	-0.509049	0.000410706	0.00108276	2819.58	4662.05	-0.72531	1.34e-09	5.88e-09	2900.94	4785.28	-0.722222	2.42e-07	1.06e-06	2642.72	5031.76	-0.928823	9.77e-16	7.86e-15	2345.76	2668.11	-0.185409
Aco007554	155.704	191.34	170.834	206.483	146.738	171.637	376.983	435.504	388.717	402.327	434.145	370.311	171.585	180.687	186.838	322.259	304.385	334.837	487.313	384.821	405.741	2432.83	2407.11	0.0156776	0.92467	0.966247	5008.87	2115.67	1.24354	2.42e-19	2.55e-18	5290.29	2231.14	1.24582	5.24e-22	5.18e-21	4676.9	1999.31	1.22577	2.12e-15	1.99e-14	4958.85	2101.98	1.23799	2.05e-18	1.92e-17	4401.86	4300.47	0.0337129
Aco004959	62.0156	83.6957	51.6892	138.348	110.226	130.046	199.899	227.878	233.516	115.153	122.58	129.091	93.0202	81.4866	85.3965	131.293	130.565	144.735	101.067	107.517	120.621	4217.72	2205.21	0.935944	2.96e-06	4.96e-05	6627.78	1938.96	1.77357	8.11e-18	7.76e-17	3865.41	2044.03	0.919509	1.39e-06	4.59e-06	6188.44	3465.88	0.836215	6.55e-10	3.84e-09	3622.78	3644.05	-0.00882255	0.940451	0.958311	3215.83	5690.41	-0.823549
Aco014089	46.3255	73.4568	96.9628	82.81	77.0134	86.0988	71.4677	65.525	66.9501	58.9839	60.748	68.2302	45.7559	51.5806	63.6857	81.8481	84.846	91.9076	77.7421	61.9309	48.1879	4691.09	4141.38	0.179776	0.462159	0.676053	3499.8	3640.76	-0.0570395	0.825341	0.875118	3391.32	3841.88	-0.180073	0.465606	0.575955	3267.95	3854.74	-0.238501	0.0325145	0.0609382	3178.43	4053.09	-0.351124	0.000876451	0.00220081	2821.46	3005.48	-0.0912616
Aco008557	69.1716	66.0458	68.9909	87.7315	92.516	80.2603	73.6942	67.2107	67.4785	65.4604	64.1535	73.6639	76.8026	67.3879	72.7335	70.2886	71.2514	67.562	74.9924	71.3246	56.1639	4843.77	3807.59	0.346929	0.00100939	0.00715035	3484.97	3344.57	0.0591548	0.569629	0.674392	3574.1	3527.34	0.0187357	0.859135	0.898906	3254.11	3980.99	-0.290735	0.0146669	0.0300476	3349.9	4185.72	-0.321279	0.00354336	0.00800499	2973.8	2992.77	-0.00923836
Aco019352	107.239	94.9954	90.424	128.535	119.911	125.652	44.2527	53.119	43.1519	65.5453	62.7539	64.0458	111.089	110.865	104.688	70.7124	92.2439	75.2701	49.6958	57.6588	60.6196	5855.74	4595.82	0.349635	0.00226057	0.0138113	1978.11	4036.38	-1.02899	2.12e-12	1.36e-11	2846.83	4256.31	-0.580211	1.28e-07	4.69e-07	1847.02	4812.07	-1.38162	2.5e-27	5.21e-26	2668.56	5059.59	-0.923062	3e-26	4.35e-25	2369.04	1698.3	0.480323
Aco017563	86.2595	132.464	126.259	189.575	121.317	181.383	149.641	189.037	118.982	136.177	142.744	142.092	108.387	110.429	91.5808	109.754	111.067	93.1403	75.6136	95.4558	74.4993	5350.37	3758.36	0.50969	0.0242453	0.0903157	4473.43	3304.64	0.436845	0.0650848	0.111638	4328.88	3485.65	0.312592	0.0808766	0.13058	4177.01	4396.1	-0.0739948	0.72603	0.796513	4057.4	4622.03	-0.188263	0.244257	0.345464	3601.7	3840.51	-0.0924898
Aco005402	47.7517	55.5507	45.1904	84.9836	72.8649	81.4244	207.893	246.921	177.056	183.881	209.282	201.138	118.521	139.972	145.164	347.834	280.683	290.917	294.429	267.156	243.449	1829.37	1138.54	0.685007	7.33e-07	1.48e-05	4344.23	1000.61	2.11848	1.67e-33	3.72e-32	4297.86	1055.09	2.02683	2.49e-54	8.31e-53	4056.37	1503.29	1.4317	1.97e-20	2.73e-19	4028.01	1580.59	1.34908	1.75e-34	3.66e-33	3575.36	3729.8	-0.0608888
Aco012186	93.4071	103.459	104.218	78.5787	90.0953	68.4403	39.5351	41.7029	32.603	57.1904	46.7433	43.7788	62.5869	47.9373	46.1625	11.2501	7.88077	15.0586	48.356	53.1694	33.302	5714.18	7273.1	-0.348282	0.012193	0.0531053	2466.5	6390.76	-1.37377	5.6e-22	6.93e-21	3363.44	6740.23	-1.0027	2.11e-13	1.25e-12	2303.1	4696.8	-1.0281	5.31e-11	3.44e-10	3153.67	4938.31	-0.646613	9.52e-06	3.15e-05	2800.18	2117.9	0.403253
Aco007246	17.5719	21.2536	23.0995	35.5952	33.7129	28.4703	251.046	238.041	284.607	170.689	161.127	189.297	22.7905	23.195	29.325	105.275	66.6374	70.2326	180.881	174.027	158.598	1296.6	823.037	0.655035	7.27e-05	0.000782353	9230.49	723.293	3.6736	1.25e-119	2.74e-117	6534.58	762.952	3.09814	2.84e-101	3.03e-99	8618.77	1065.73	3.0163	1.55e-101	3.02e-99	6124.85	1120.48	2.45124	2.03e-85	1.76e-83	5437.36	7926.27	-0.54389
Aco000565	222.528	65.4206	57.6563	139.17	203.323	131.898	118.003	88.3563	87.4529	137.8	143.539	191.232	210.909	204.101	240.918	177.844	247.8	148.393	232.987	214.297	227.039	3759.79	2754.64	0.44876	0.494132	0.701952	2093.75	2412.87	-0.204681	0.757368	0.823014	3541.67	2542.6	0.478103	0.454763	0.566153	1955.13	3090.53	-0.660464	0.00115482	0.00297764	3318.88	3249.61	0.0306435	0.872181	0.911347	2946.05	1798.43	0.712148
Aco002427	58.0752	75.9412	71.8808	58.1719	64.7613	72.8205	70.8159	63.5289	79.1681	59.8146	62.1208	64.6599	60.7646	63.9287	56.8361	63.3524	57.0759	70.5287	76.1259	72.2956	80.1618	3860.32	4069.56	-0.0760103	0.620313	0.79192	3788.4	3577.18	0.0828963	0.616184	0.71482	3479.75	3772.81	-0.11666	0.397652	0.508592	3537.36	3171.74	0.157388	0.276303	0.375801	3261.46	3335.21	-0.0325312	0.778314	0.838443	2895.17	3253.28	-0.168473
Aco002144	22.8465	22.2265	27.3436	17.84	18.4729	22.2871	20.6892	17.0367	25.9423	15.8201	12.5352	16.0101	32.1753	29.0996	31.5247	26.3469	26.0772	33.1671	27.6697	28.1602	30.6268	3159.53	3915.02	-0.309186	0.0371438	0.124684	3089.65	3438.89	-0.154421	0.431333	0.551352	2261.62	3627.6	-0.681927	7.57e-06	2.3e-05	2884.89	2595.86	0.152315	0.39807	0.501223	2120.16	2729.63	-0.364978	0.0103548	0.0213832	1882.46	2653.34	-0.495509
Aco012332	129.729	123.141	128.225	136.187	136.917	131.573	178.56	245.208	210.695	284.174	276.401	238.23	127.565	141.555	164.199	178.93	183.608	191.434	153.756	148.437	163.07	3123.66	2950.12	0.0822135	0.368375	0.593071	4404.04	2591.35	0.76516	6.41e-07	2.42e-06	5828.54	2732.94	1.09275	5.09e-23	5.33e-22	4112.04	2567.06	0.679881	2.47e-06	9.59e-06	5464.07	2699.11	1.01777	4.18e-22	4.9e-21	4850.82	3780.56	0.359628
Aco011663	111.481	94.3179	97.1949	97.7205	75.9108	90.127	229.063	258.34	294.903	249.155	250.534	233.508	142.793	141.635	148.721	198.811	188.725	184.164	233.231	203.44	226.912	2007.76	2314.31	-0.204625	0.166739	0.360096	5358.6	2032.35	1.3988	6.16e-20	6.71e-19	5278.03	2143.23	1.3002	3.12e-31	4.76e-30	5003.35	1649.87	1.6003	1.13e-25	2.17e-24	4947.51	1734.67	1.51149	6.27e-37	1.45e-35	4392.05	4600.73	-0.0671116
Aco005247	58.5171	67.1455	58.8611	65.9014	60.3681	65.0589	136.987	132.378	144.072	142.083	131.218	147.217	93.8625	84.8736	86.3425	79.257	86.5307	109.309	133.849	126.635	142.195	2518.03	2435.13	0.0487575	0.665915	0.821789	4895.29	2140	1.19407	5.58e-23	7.25e-22	5233.44	2256.69	1.21373	1.37e-26	1.71e-25	4570.91	2069.2	1.14325	3.75e-25	6.94e-24	4905.6	2175.64	1.17261	7.92e-33	1.55e-31	4355.09	4203.6	0.0509232
Aco007729	119.527	105.136	115.809	57.4271	47.7398	78.3167	129.739	142.32	164.397	125.137	122.884	113.847	127.273	135.399	147.983	150.929	163.436	215.111	152.717	138.338	198.522	1832.06	3410.85	-0.896012	5.25e-06	8.19e-05	3921.85	2995.5	0.388849	0.00662096	0.0141941	3416.99	3159.25	0.113125	0.281009	0.382204	3661.86	1504.88	1.28231	3.05e-11	2.01e-10	3203.12	1582.47	1.01644	2.88e-09	1.38e-08	2843.58	3367.26	-0.244027
Aco008163	38.9453	49.9293	42.3596	50.3547	54.3218	58.1569	50.3967	45.8392	50.2668	42.7752	43.8648	54.3536	29.9745	35.2051	30.7154	51.7904	48.4135	63.6208	73.0168	70.5694	80.4262	4225.61	3413.84	0.307976	0.0247172	0.0916073	3420.11	3000.85	0.188839	0.19489	0.288483	3460.81	3164.51	0.129078	0.413933	0.525965	3193.52	3472.13	-0.120737	0.309841	0.412535	3243.35	3650.96	-0.171112	0.183121	0.271799	2879.07	2937.04	-0.0290117
Aco009488	90.1442	91.2364	99.3004	93.994	97.3153	96.047	182.24	209.803	240.075	272.182	261.542	242.883	118.675	128.705	125.106	170.011	148.449	165.918	177.611	168.045	186.663	2419.74	2369.85	0.0297616	0.763515	0.880607	4788.59	2081.9	1.20178	6.99e-16	5.87e-15	6182.17	2195.85	1.49324	1.06e-48	3.02e-47	4471.11	1988.48	1.1692	2.54e-17	2.79e-16	5795.39	2090.81	1.47106	4.3e-56	1.81e-54	5144.97	4111.25	0.323423
Aco001863	88.2237	110.549	87.457	136.356	145.803	137.376	139.314	165.446	139.173	132.551	144.406	130.409	55.8121	57.2908	57.1821	95.9781	94.9486	88.0315	126.177	132.641	117.795	4963.68	3394.95	0.548152	5.73e-05	0.000641557	4723.05	2984.2	0.662528	3.03e-05	9.42e-05	4557.15	3146.66	0.534563	9.72e-05	0.000258122	4410.03	4079.17	0.112586	0.357472	0.461144	4271.43	4289.08	-0.00570046	0.952101	0.96645	3791.59	4054.98	-0.0968067
Aco002739	61.6545	70.6638	68.349	57.5185	64.8572	71.0541	96.1987	93.6119	98.4073	80.5195	82.0565	88.6216	61.5031	62.8581	60.2986	109.813	106.003	107.111	127.438	111.685	115.605	2995.07	3114.95	-0.0564378	0.662719	0.819559	4014.4	2737.3	0.552538	9.93e-07	3.68e-06	3678.17	2886.9	0.349406	0.00153098	0.00345627	3748.4	2460.89	0.606971	1.33e-06	5.36e-06	3447.42	2587.7	0.413555	0.000350536	0.000932182	3060.29	3447.17	-0.171926
Aco008468	86.6576	98.4573	96.0078	107.25	101.432	102.566	135.117	163.602	135.69	134.957	130.837	134.001	112.915	109.995	125.121	133.261	138.15	133.738	160.176	152.785	140.973	3284.09	2973.96	0.143181	0.160449	0.350927	4122.06	2613.35	0.657482	1.76e-06	6.33e-06	3988.75	2756.18	0.533308	1.1e-07	4.04e-07	3848.86	2698.85	0.512047	4.88e-05	0.000158435	3738.89	2837.65	0.397862	4.69e-06	1.6e-05	3319.2	3538.94	-0.092466
Aco007160	226.304	239.041	239.972	285.122	236.318	263.442	249.201	324.607	252.613	273.085	279.629	257.344	206.256	225.482	223.437	182.915	201.252	201.208	162.089	158.079	159.741	4467.09	4025.74	0.150276	0.184001	0.383364	4229.99	3537.01	0.258105	0.0841574	0.139813	4359.77	3730.32	0.225061	0.0145277	0.0278487	3949.61	3670.93	0.10543	0.480865	0.582772	4086.69	3859.63	0.0823313	0.44014	0.552333	3627.82	3631.35	-0.001325
Aco018578	48.3696	44.7171	57.4948	85.5964	82.2025	60.5347	164.211	155.914	204.018	137.437	134.214	124.703	39.1544	38.6034	40.014	205.705	138.461	144.192	235.268	191.875	209.265	2565.26	1696.19	0.596248	0.00107388	0.00748626	5298.25	1489.73	1.83029	2.84e-26	4.42e-25	4209.51	1571.52	1.4211	1.02e-26	1.28e-25	4947.07	2108.77	1.23062	3.56e-12	2.57e-11	3946.06	2217.02	0.832355	1.2e-08	5.43e-08	3503.13	4549.56	-0.377186
Aco004951	65.8365	71.968	84.2057	85.2091	109.532	92.0734	70.0343	66.874	69.3957	55.9068	52.9838	65.4245	67.9426	65.197	68.5699	44.884	43.4385	39.8427	48.8064	48.7836	49.4244	5740.06	4452.93	0.366074	0.0177134	0.0710746	3713.19	3912.37	-0.0754843	0.580938	0.683783	3298.51	4127.06	-0.323549	0.028799	0.0520081	3467.16	4717.34	-0.444009	0.000981551	0.00256332	3091.56	4960.27	-0.68207	5.77e-07	2.19e-06	2744.52	3188.59	-0.216606
Aco016318	89.6262	91.0467	84.6539	97.4261	87.4357	111.451	290.153	318.91	302.671	270.165	266.477	260.657	72.7061	75.1977	73.0859	200.648	151.302	184.204	381.708	263.706	296.41	2144.97	1926.5	0.155719	0.242647	0.458094	5937.15	1692.52	1.81083	2.99e-65	2.06e-63	5457.84	1784.82	1.61284	6.39e-73	3.57e-71	5543.68	1762.33	1.65273	1.71e-36	5.39e-35	5116.01	1853.08	1.46429	2.43e-37	5.71e-36	4541.69	5097.69	-0.166617
Aco012130	24.5946	30.0027	30.4656	33.7259	33.8825	34.9062	35.4938	33.5762	34.7624	32.4091	33.854	39.4982	42.412	41.8469	44.839	51.4134	54.0402	50.8543	51.7084	51.6402	45.4623	3371.5	2804.19	0.265827	0.0318528	0.111252	3071.85	2464.48	0.317821	0.0193516	0.0376361	3289.94	2599.39	0.339721	0.0194115	0.036324	2868.32	2770.54	0.0499722	0.632668	0.717974	3083.28	2913.12	0.0815924	0.465829	0.57579	2736.95	2637.89	0.0529753
Aco006060	70.01	89.449	80.9763	163.65	96.4949	137.692	104.669	124.858	118.837	113.405	95.5487	95.9238	278.134	254.273	376.731	318.045	386.214	366.307	106.865	82.9556	141.067	2965.11	1797.06	0.722775	0.000611487	0.00468085	2336.31	1579.6	0.564948	0.000236621	0.000646686	2148.74	1665.88	0.367499	0.0112514	0.0220213	2181.44	2436.53	-0.159785	0.410943	0.513697	2014.55	2561.61	-0.346881	0.0572032	0.0994008	1788.66	2005.81	-0.165347
Aco011249	17.4823	19.0802	19.8688	20.3418	17.6684	22.7125	24.4112	22.1657	23.3605	19.7024	13.8948	16.7643	24.8906	22.7222	22.4692	17.9345	16.7467	19.8051	15.9081	20.6488	19.7489	3952.4	3683.23	0.102069	0.447368	0.66368	4095.77	3236.26	0.339748	0.00300951	0.00689259	3098.58	3413.34	-0.139594	0.367937	0.477246	3824.43	3247.38	0.235597	0.0776978	0.130891	2905.36	3414.55	-0.233253	0.126824	0.198883	2579.95	3517.3	-0.447113
Aco017444	7.13434	7.74985	11.6553	11.5846	7.84071	7.59023	49.2712	45.7338	77.6697	99.5613	52.9716	45.5124	20.3915	23.1617	27.3835	95.3463	76.7755	77.5448	394.899	264.691	255.165	458.035	451.052	0.0214444	0.936227	0.971457	2635.92	396.249	2.73332	8.14e-23	1.05e-21	3170.59	418.13	2.92229	2.16e-21	2.06e-20	2461.14	376.499	2.70882	3.41e-29	7.77e-28	2974.83	395.797	2.91001	4.23e-12	2.58e-11	2642.64	2263.38	0.223474
Aco017783	69.8405	69.9447	77.1696	55.741	61.8671	64.203	71.4693	62.6782	84.5786	69.382	67.7145	71.4302	83.8169	85.6851	103.35	70.0465	71.6896	80.1557	88.1641	73.3553	85.6675	3151.45	3770.62	-0.258847	0.0217131	0.0830217	3411.46	3312.38	0.0426283	0.785308	0.842797	3417.63	3493.72	-0.0319983	0.743445	0.805843	3185.38	2589.55	0.298912	0.0465611	0.0836999	3203.46	2722.94	0.234335	0.0205928	0.0398582	2843.84	2929.6	-0.0431185
Aco015105	94.4763	93.1677	68.0243	102.527	101.518	94.2817	221.767	262.419	240.084	195.669	200.778	185.272	95.5392	99.7125	107.491	162.087	139.977	141.799	211.879	215.33	206.125	2611.87	2245.54	0.218188	0.183077	0.382365	5702.91	1972.83	1.53169	3.9e-18	3.83e-17	4815.33	2079.82	1.21149	1.18e-14	7.59e-14	5324.91	2146.56	1.31098	8.82e-28	1.88e-26	4513.7	2256.94	1.00036	5.97e-26	8.48e-25	4006.87	4896.23	-0.289179
novel.1156	118.751	141.112	141.873	176.394	176.029	170.001	122.894	142.132	149.426	164.618	146.944	149.315	126.653	133.212	131.5	102.343	100.332	91.9059	119.126	88.989	91.5635	5125.43	3950.92	0.375416	0.000945749	0.00673658	3657.64	3472.12	0.0752463	0.604936	0.705218	4274.42	3662.11	0.223098	0.0663594	0.109704	3415.16	4212.14	-0.302338	0.0135841	0.0280558	4007.13	4428.8	-0.144193	0.123206	0.194006	3557.62	3140.29	0.179829
Aco000052	0.287131	0.45401	0.557127	2.64516	4.41558	3.43719	318.403	313.336	244.456	198.363	263.385	278.454	2.56428	3.4649	4.22014	190.786	85.0495	90.4314	447.327	378.992	250.994	101.867	12.613	3.00703	1.79e-11	1.08e-09	7642.19	11.0889	9.42107	2.02e-233	2.9e-230	6792.82	11.7003	9.17409	1.37e-217	7.16e-215	7136.03	83.7142	6.42036	3.16e-235	6.11e-232	6364.76	88.0318	6.18303	3.91e-225	3.33e-222	5648.72	6562.58	-0.216317
Aco029236	42.8653	49.7799	44.7136	66.4668	57.8208	53.3319	69.5303	71.8952	78.523	70.5903	63.0537	67.1364	51.5381	50.7578	51.5993	74.2472	75.8618	73.0365	55.899	61.8318	58.1543	3791.26	2939.73	0.367012	0.00583689	0.0297017	4223.7	2583.48	0.709459	1.76e-08	7.93e-08	4051.94	2724.44	0.572821	3.22e-07	1.13e-06	3943.77	3116.07	0.340054	0.0107718	0.022816	3798.43	3276.11	0.213535	0.0689491	0.117351	3372.3	3626.66	-0.105078
Aco005992	37.104	38.989	37.1126	46.1622	52.1431	46.588	37.5682	31.8136	35.2868	31.9319	26.8871	31.2785	45.032	41.7022	39.265	35.9336	37.9715	35.1449	34.457	37.4557	33.6436	4915.09	3850.34	0.352055	0.000686816	0.00515212	3193.84	3382.93	-0.082965	0.489574	0.606105	2889.11	3567.58	-0.304365	0.00681207	0.013812	2982.27	4039.35	-0.43758	0.000539881	0.00147462	2708.38	4247.23	-0.648988	1.45e-08	6.52e-08	2404.64	2742.92	-0.189933
Aco019012	491.512	622.036	543.211	776.277	754.864	765.497	327.237	330.074	242.653	328.964	330.082	332.902	395.976	382.285	393.798	262.15	294.082	230.97	363.634	270.92	255.792	7048.53	5097.24	0.467719	0.000112602	0.00112406	2483.64	4480.41	-0.851346	2e-06	7.15e-06	2878.72	4724.9	-0.71477	9.79e-09	3.98e-08	2319.15	5792.34	-1.3209	3.3e-19	4.19e-18	2698.31	6090.32	-1.17452	2.05e-46	6.48e-45	2395.35	2132.74	0.167899
Aco014142	66.9905	78.1785	76.037	74.1866	78.5777	70.4256	131.927	163.16	139.579	152.639	142.709	133.317	93.2917	104.956	97.8293	199.488	166.243	196.771	273.42	227.755	249.712	2106.4	2092.74	0.00903644	0.93891	0.972891	3688.86	1839.09	1.00425	2.31e-12	1.48e-11	3824.12	1939.63	0.979538	6.41e-17	4.77e-16	3444.34	1731.14	0.992848	7.33e-14	6.07e-13	3584.98	1820.19	0.97852	2.11e-20	2.24e-19	3182.72	3166.94	0.0072399
Aco009139	54.1093	45.5702	47.2559	57.1771	73.9035	65.6718	110.141	109.991	112.404	99.2177	91.5167	105.879	50.0529	56.1007	59.8547	108.06	90.4257	89.3818	168.901	158.025	140.611	2893.47	2167.31	0.416631	0.0053466	0.0277479	4398.06	1903.23	1.20838	1.18e-23	1.59e-22	4123.83	2007.08	1.03871	3.16e-17	2.4e-16	4106.63	2377.79	0.788653	3.9e-09	2.11e-08	3865.42	2500.29	0.628761	9.25e-07	3.43e-06	3431.62	3776.54	-0.138345
Aco008899	60.669	58.6017	70.1245	45.0877	45.3061	53.1526	81.0159	69.6003	88.635	56.5973	55.9746	59.2888	82.3836	83.8271	89.5339	71.7329	69.816	75.707	83.8283	74.9036	82.7198	2651.7	3508.29	-0.403693	0.00249668	0.0149699	3976.97	3081.62	0.367951	0.0156863	0.0311232	3002.24	3250.59	-0.114961	0.320007	0.42588	3713.46	2178.73	0.769102	9.31e-08	4.32e-07	2814.04	2290.95	0.29613	0.00679506	0.0145938	2498.11	3415.34	-0.451391
novel.727	42.7843	47.7585	49.8153	54.5687	54.6946	51.444	66.6932	72.3735	81.774	70.8338	79.3864	74.1093	60.7516	66.7274	72.7974	97.9347	102.535	107.397	63.6688	67.5206	68.1703	3005.84	2631.81	0.191454	0.0787582	0.213734	3715.93	2312.54	0.684388	1e-06	3.72e-06	3967.83	2439.11	0.701945	9.4e-10	4.16e-09	3469.6	2470.3	0.490439	0.000115808	0.000353178	3718.84	2597.35	0.518067	1.18e-07	4.82e-07	3300.99	3190.5	0.0488909
Aco003040	33.1183	32.2423	31.4531	29.3132	24.2554	34.3545	68.3396	72.7582	84.4674	100.265	97.0847	112.53	29.9137	29.6306	33.4528	152.034	110.697	138.621	189.698	163.039	190.964	1380.62	1525.04	-0.142524	0.371648	0.596338	3187.37	1339.67	1.25079	1.76e-20	1.98e-19	4602.76	1412.78	1.70388	1.17e-54	3.95e-53	2976.08	1134.25	1.39093	4.35e-17	4.66e-16	4314.06	1192.66	1.85359	3.65e-38	8.79e-37	3829.75	2736.72	0.484424
Aco005583	0	0.304195	0.153244	0.18937	0	0.332653	825.982	796.542	802.408	504.658	430.681	689.542	0.611933	0.434594	0.133667	54.3042	11.8128	24.0874	626.546	461.101	322.803	2.9023	2.5451	0.212488	0.912315	0.960348	12144.7	2.2463	12.443	9.24e-124	2.19e-121	8557.6	2.36867	11.8588	1.11e-101	1.2e-99	11340.1	2.3816	12.0953	5.23e-131	1.99e-128	8020.08	2.50458	11.5274	1.99e-110	3.02e-108	7120.14	10428.9	-0.55071
Aco003873	69.1777	74.3357	75.7843	75.3995	64.0813	68.2622	94.1278	91.7181	100.964	103.817	102.97	94.7035	73.494	83.0385	80.5957	116.619	105.746	109.915	152.538	128.421	127.572	2832.01	2997.82	-0.0819232	0.46807	0.680836	3517.84	2633.96	0.417569	0.000162522	0.000454032	3886.21	2777.99	0.484429	1.13e-06	3.75e-06	3284.73	2327.34	0.497034	4.72e-05	0.00015363	3642.95	2446.97	0.574016	6.4e-08	2.69e-07	3234	3020.75	0.0983987
Aco011141	59.7399	46.4183	58.0038	38.3954	43.0124	47.4051	51.7448	51.9421	67.5006	53.6103	45.3672	50.5289	94.6393	84.9694	93.9644	47.2552	48.8883	53.4248	52.4765	46.3039	65.0104	2851.13	3644.9	-0.354354	0.0217584	0.0831685	3409.31	3200.12	0.0914177	0.609129	0.70885	3128.26	3375.33	-0.109854	0.441579	0.553905	3183.3	2342.62	0.442508	0.0050431	0.0114529	2932.64	2463.34	0.251372	0.0408178	0.0737122	2603.76	2927.39	-0.169313
Aco004267	108.259	136.807	143.048	85.6713	83.7686	103.792	67.3896	71.2851	80.2779	64.5305	71.0186	75.7395	95.4228	91.9417	90.449	49.7069	50.1262	46.7046	42.1452	50.5526	47.0101	4334.07	6170.84	-0.509569	0.00117504	0.00806327	3124.81	5423.57	-0.795347	8.12e-07	3.04e-06	3170.24	5720.79	-0.85174	1.07e-08	4.34e-08	2917.69	3560.86	-0.287466	0.0406281	0.0741738	2971.1	3744.31	-0.334147	0.00740243	0.0157926	2637.28	2683.03	-0.0251947
Aco019537	427.848	454.919	443.121	511.65	493.498	471.701	874.537	922.278	993.781	930.193	961.836	1019.9	2.90297	4.58152	1.96792	8.84882	5.24036	4.22176	6.96909	4.43995	4.50157	5026.56	4525.06	0.151569	0.0963372	0.245293	8544.32	3975.81	1.10383	4.89e-24	6.74e-23	9372.82	4192.96	1.1605	2.03e-35	3.68e-34	7978.01	4131	0.949691	1.65e-17	1.83e-16	8784.78	4343.41	1.01623	8.35e-29	1.37e-27	7798.19	7336.4	0.0879345
Aco013806	86.1709	83.2073	92.6738	72.914	82.4643	77.5096	68.7172	58.3831	52.5377	57.1689	69.1984	68.8759	80.5198	72.2626	71.6857	67.9175	61.2876	66.1629	64.6929	58.3121	51.1197	4227.95	4770.15	-0.174345	0.104655	0.260486	2932.9	4190.1	-0.514958	0.000424094	0.00111575	3352.45	4419.45	-0.39884	0.00155224	0.00350186	2738.68	3474.45	-0.343465	0.0151051	0.0308297	3141.66	3653.32	-0.217653	0.0663049	0.113356	2788.44	2518.91	0.146862
Aco003013	18.6245	5.93766	10.8089	22.4071	34.0404	17.3341	481.887	554.136	659.334	535.651	442.252	426.721	19.238	26.4831	47.7947	213.939	120.816	134.947	309.266	224.242	324.525	475.904	229.132	1.0531	0.0112747	0.0500897	9832.9	200.796	5.61296	4.8e-57	2.56e-55	8557.93	211.747	5.33583	6.42e-60	2.53e-58	9180.93	391.271	4.55522	2.47e-87	3.51e-85	8023.91	411.391	4.28906	9.54e-93	9.74e-91	7124.41	8442.03	-0.244872
Aco009602	176.231	162.73	179.307	161.714	137.417	157.363	102.667	122.989	114.583	177.107	158.308	145.501	177.575	179.589	195.66	145.499	156.811	167.109	146.72	121.338	122.889	3759.48	4281.27	-0.187323	0.104805	0.260673	2520.57	3760.33	-0.577058	3.66e-06	1.27e-05	3744.21	3966	-0.0829557	0.476794	0.586097	2353.49	3089.3	-0.392572	0.00281303	0.00673748	3510.31	3248.17	0.111867	0.34465	0.456458	3116.58	2164	0.526259
Aco018839	62.9135	63.9112	64.7628	69.8835	80.5593	70.0765	84.1011	80.283	80.7294	77.9348	81.53	82.4905	66.6385	69.3117	69.4735	72.3218	73.7569	77.6448	85.8962	78.6466	79.1154	3796.75	3307.29	0.19875	0.0689681	0.194915	3795.57	2905.53	0.385453	4.25e-05	0.00012967	3938.84	3064.3	0.362111	3.73e-05	0.000104575	3544.1	3120.32	0.183995	0.120858	0.190579	3691.79	3280.91	0.170565	0.103278	0.166908	3277.15	3259.35	0.00786402
Aco006471	57.5726	57.0691	85.1116	43.9572	55.0787	55.983	99.2326	88.9216	124.383	84.3665	73.9839	83.0394	81.0105	92.4174	101.748	79.45	79.2976	96.4246	98.0155	77.4998	95.4494	2443.25	3155.31	-0.369174	0.0650727	0.187311	4432.19	2771.49	0.677287	0.0020994	0.00493847	3596.5	2924.34	0.298249	0.105912	0.165519	4138.43	2007.54	1.04381	8.8e-10	5.09e-09	3371.43	2111.03	0.675394	1.95e-07	7.76e-07	2993.23	3806.05	-0.346813
Aco014892	85.1159	98.1016	88.356	120.84	128.791	116.436	142.886	139.237	142.209	142.198	137.788	139.495	149.898	144.076	141.798	127.404	148.854	144.404	131.892	134.544	139.29	3598.89	2676.67	0.427037	0.000126313	0.00123755	3752.28	2352.26	0.673919	3.59e-09	1.73e-08	3898.96	2480.61	0.652616	3.13e-10	1.44e-09	3503.66	2957.71	0.244656	0.0244837	0.0474096	3654.77	3109.86	0.233293	0.0121905	0.0248133	3244.52	3222.1	0.0100051
Aco002807	132.839	159.341	142.632	93.6898	152.208	143.494	78.0023	90.4886	138.152	106.455	82.4372	86.5994	76.2251	92.8128	83.9794	188.034	177.623	243.509	212.423	158.122	219.206	3581.34	4007.92	-0.162398	0.421023	0.640475	2537.46	3522.48	-0.472908	0.0443109	0.0793812	2393.89	3714.71	-0.633711	1.28e-05	3.79e-05	2369.14	2942.57	-0.312406	0.19614	0.285259	2244.56	3094.48	-0.463112	0.0131984	0.0266348	1993.04	2178.45	-0.128665
Aco015601	75.1054	81.1564	95.7687	39.8925	46.126	55.9088	54.3284	51.5343	61.705	50.512	51.043	54.2053	101.898	101.529	119.661	83.2654	84.4892	114.165	80.4332	65.6964	91.7014	2359.49	4200.18	-0.831794	8.45e-07	1.68e-05	2506.36	3690.21	-0.55804	0.0002689	0.000729452	2448.71	3892.73	-0.66899	3.29e-07	1.16e-06	2340.26	1938.42	0.271642	0.0930122	0.152827	2295.14	2038.4	0.170678	0.225044	0.322426	2037.42	2152.23	-0.079463
Aco025177	67.745	60.1472	54.0664	77.2976	71.9552	68.47	144.889	141.349	138.61	101.326	99.4603	106.6	27.7689	26.8338	29.4435	121.429	83.5193	107.259	166.327	144.145	153.4	3021.18	2533.17	0.254215	0.0581435	0.173079	5302.93	2224.85	1.25318	2.65e-21	3.15e-20	4033.5	2345.93	0.781937	2.96e-10	1.37e-09	4951.58	2482.97	0.995918	1.52e-19	1.98e-18	3780.66	2610.6	0.534322	5.64e-08	2.38e-07	3356.22	4553.67	-0.440238
Aco000150	158.563	189.281	198.803	198.022	236.082	218.386	156.404	178.686	171.46	215.606	195.714	188.777	173.241	179.446	156.433	131.028	136.94	148.208	188.616	149.66	177.34	4630.57	3888.07	0.251977	0.0667204	0.190787	3232.91	3416.85	-0.0797896	0.573321	0.677692	4025.26	3604.02	0.159514	0.222908	0.314187	3018.63	3805.28	-0.33388	0.00824312	0.0178723	3773.6	4001.25	-0.0842323	0.452022	0.563312	3350.26	2775.69	0.2714
Aco022206	89.4035	107.746	110.329	72.0513	70.202	91.0746	61.8255	54.9642	77.91	72.4059	68.3549	69.1492	121.991	124.4	135.837	99.4573	102.368	129.641	151.392	112.084	142.655	2936.04	3878.77	-0.401393	0.0103084	0.0468468	2205.01	3408.78	-0.628235	0.000619684	0.00158665	2497.57	3595.41	-0.525618	2.3e-05	6.61e-05	2058.87	2412.12	-0.228476	0.194857	0.283818	2341.23	2536.42	-0.116037	0.366343	0.478496	2078.48	1893.51	0.134111
Aco000477	47.348	76.632	58.8048	116.12	129.722	109.028	153.012	162.184	133.497	132.882	145.336	168.837	84.3977	88.335	99.3226	137.842	144.635	135.92	107.38	97.2436	78.5644	4047.64	2088.8	0.954482	7.39e-07	1.49e-05	4601.69	1837.09	1.3249	1.46e-10	8.09e-10	4822.67	1937.24	1.31597	4.01e-11	2.01e-10	4296.82	3326.68	0.36934	0.00580399	0.0130171	4519.5	3497.8	0.369849	0.00399055	0.0089378	4011.69	3951.27	0.0218669
Aco010059	95.6627	93.5556	90.429	93.5451	84.2813	89.4759	59.8497	63.0406	65.9126	96.1872	99.8779	92.3329	99.1197	104.635	112.099	116.138	127.657	118.416	106.153	94.2316	91.6132	3519.64	3693.28	-0.0692406	0.478777	0.688558	2236.5	3244.41	-0.536429	4.52e-07	1.74e-06	3590.86	3421.44	0.0698955	0.443158	0.55513	2088.27	2892.35	-0.469858	4.22e-05	0.000137985	3365.88	3041.09	0.146314	0.123715	0.194641	2987.9	1920.33	0.637625
Aco014082	36.7548	35.2787	35.0236	57.1706	57.4204	47.972	26.9446	29.5273	28.3157	18.5403	22.3183	21.4896	35.3048	34.7924	29.8739	32.5748	31.5524	30.5632	20.1209	31.3052	25.5481	6178.4	4080.5	0.598298	4.58e-07	9.86e-06	2898.22	3584.39	-0.306463	0.00266825	0.00616529	2241.17	3780.04	-0.754265	1.28e-10	6.12e-10	2706.15	5078.21	-0.907846	8.03e-13	6.11e-12	2100.31	5339.19	-1.34592	4.66e-27	7.04e-26	1864.19	2488.44	-0.416844
Aco007685	97.1363	98.7629	102.176	100.623	93.2412	101.932	222.895	249.524	229.44	279.713	271.198	262.151	109.952	114.013	123.022	200.885	183.173	187.904	202.833	179.823	195.539	2250.01	2273.78	-0.0148473	0.879803	0.943749	4802.09	1997.56	1.26538	6.17e-33	1.34e-31	5847.76	2106.77	1.47282	8.47e-64	3.65e-62	4483.84	1848.92	1.27778	1.14e-29	2.67e-28	5481.68	1944.04	1.49518	5.67e-60	2.65e-58	4866.4	4123.05	0.239169
Aco011703	31.8368	34.6743	43.6645	32.9954	39.8954	40.3537	41.8244	34.6384	49.881	36.166	31.5766	38.7971	52.8058	57.7617	62.6009	44.8786	47.4266	47.4167	49.9294	42.3195	50.6505	3258.41	3177.24	0.0362249	0.826414	0.915899	3271.15	2791.43	0.228803	0.251184	0.356637	2898.29	2944.88	-0.0232756	0.885748	0.918771	3054.38	2677.4	0.190221	0.260001	0.358157	2716.74	2815.38	-0.0515932	0.693028	0.769723	2411.96	2809.22	-0.220273
Aco008245	115.306	136.329	121.568	132.241	120.289	134.624	246.914	305.516	309.151	358.63	358.57	277.308	133.459	170.283	140.079	254.247	238.893	288.947	277.299	241.241	345.183	2231.51	2156.85	0.0496447	0.678579	0.828834	4467.39	1895.56	1.23708	3.41e-16	2.93e-15	5418.81	1998.98	1.43899	1.93e-22	1.95e-21	4171.2	1833.69	1.1856	4.6e-18	5.33e-17	5080.14	1928.03	1.39762	5.73e-27	8.6e-26	4509.92	3835.28	0.233764
Aco002384	5.06913	13.6414	9.93929	108.431	68.3215	76.9055	263.805	436.409	556.663	276.565	598.475	247.164	4.60462	10.4235	4.06387	243.059	130.976	193.421	282.648	161.005	244.171	1857.46	210.114	3.145	2.21e-21	6.25e-19	8284.19	184.968	5.48588	1.61e-49	6.72e-48	7776.59	195.072	5.31741	1.83e-20	1.64e-19	7734.39	1526.65	2.34088	6.76e-20	9.01e-19	7286.12	1604.93	2.18262	5.55e-06	1.88e-05	6463.56	7110.22	-0.137571
Aco003115	44.7772	43.2601	54.2546	41.7069	44.4594	50.2496	89.5043	84.2449	109.985	81.1452	81.9974	90.6679	64.8	65.8562	75.968	83.7692	84.2586	88.0926	85.021	81.2392	93.4601	2384.13	2493.4	-0.0646735	0.656831	0.815559	4462.04	2190.12	1.02664	1.32e-09	6.64e-09	4195.02	2310.35	0.860198	1.26e-10	6.03e-10	4166.3	1958.9	1.08867	4.9e-13	3.8e-12	3931.83	2059.82	0.932209	2.87e-16	2.38e-15	3490.31	3831.55	-0.134847
Aco005124	33.6468	35.358	36.0915	37.3904	37.9447	38.5185	51.6371	42.7126	54.0636	50.3183	50.0869	55.0958	41.2762	40.6711	43.2218	62.4264	61.9633	62.9598	57.3939	58.7665	56.4117	3008.27	2784.34	0.111576	0.216565	0.426142	3528.41	2446.28	0.528499	0.000174843	0.000486507	3885.45	2580.02	0.590513	3.72e-09	1.57e-08	3294.64	2472.07	0.41448	0.00192695	0.00475586	3641.76	2599.29	0.486331	2.34e-07	9.23e-07	3232.86	3030.24	0.0931995
Aco000585	38.5529	36.8298	43.9056	24.7296	26.6691	30.0186	25.1333	20.7348	28.7527	21.4582	18.7657	21.1169	36.4551	35.3623	34.8137	23.392	22.2996	24.6391	26.37	25.9956	26.6694	3531.44	5188.18	-0.554909	2.65e-05	0.000329787	2912.61	4557.1	-0.645726	0.000134379	0.000380019	2515.48	4806.92	-0.93449	1.68e-14	1.07e-13	2719.61	2901.57	-0.0933905	0.557356	0.651629	2358.06	3051.08	-0.372018	0.00160324	0.00386298	2093.55	2501.35	-0.257006
Aco009109	92.7598	101.729	106.262	130.146	120.78	115.813	136.169	134.517	141.3	146.579	143.536	151.034	108.019	106.466	116.162	191.491	187.925	199.432	194.153	164.53	155.282	3311.66	2722.87	0.282262	0.010989	0.0491595	3346.71	2392.46	0.484265	1.62e-05	5.22e-05	3766.93	2523.38	0.577892	2.14e-08	8.43e-08	3124.94	2721.68	0.199496	0.0756763	0.128101	3530.86	2861.58	0.303262	0.0016109	0.00388059	3134.48	2873.78	0.125125
Aco011696	190.285	186.012	184.38	210.859	197.719	191.41	164.291	184.608	166.945	232.078	226.713	208.919	166.484	177.527	182.815	205.092	205.673	211.249	223.842	182.764	208.195	3848.03	3606.43	0.0934855	0.324819	0.549805	2975.57	3168.09	-0.0904289	0.39763	0.518093	4048.67	3341.05	0.277317	0.00278699	0.00604883	2778.37	3162.45	-0.186743	0.106307	0.171142	3795.31	3325.04	0.191072	0.0502488	0.0887049	3369.31	2554.81	0.399351
Aco018525	173.073	198.77	186.569	261.435	251.661	236.73	105.146	107.54	100.03	117.187	122.53	125.604	146.573	156.28	148.543	86.4782	95.3814	85.4226	109.29	118.017	104.631	6382.7	4765.63	0.421482	6.17e-05	0.000681067	2394.19	4187.93	-0.806726	1.76e-12	1.14e-11	2940.77	4416.64	-0.586777	2.78e-08	1.08e-07	2235.56	5245.62	-1.2305	2.81e-29	6.48e-28	2756.3	5515.31	-1.00071	1.75e-26	2.56e-25	2446.73	2055.83	0.251173
Aco007086	197.099	59.6114	60.0059	74.6575	111.289	86.493	48.1211	31.9817	40.8759	47.1962	58.275	61.859	188.97	177.394	200.678	70.3028	141.386	89.2621	112.423	83.9366	83.6109	3410.19	3986.3	-0.225221	0.721904	0.856999	1362.08	3492.09	-1.3583	0.00180732	0.0042996	1980.74	3680.29	-0.893799	0.129796	0.197555	1271.9	2802.63	-1.13969	1.56e-08	7.9e-08	1856.07	2947.06	-0.666871	9.88e-05	0.000285642	1647.36	1170.04	0.493634
Aco017445	375.188	413.578	374.349	479.347	492.605	430.171	713.244	788.053	814.808	1160.54	1328.71	981.667	518.268	603.278	506.735	738.707	581.763	696.446	779.502	669.733	818.097	2648.37	2202.74	0.265604	0.0206842	0.0800421	3934.94	1935.58	1.02391	2.99e-17	2.75e-16	6197.85	2041.16	1.60261	1.3e-28	1.76e-27	3674.12	2176.66	0.755763	1.09e-09	6.24e-09	5809.64	2288.57	1.34441	1.29e-23	1.63e-22	5156.85	3378.52	0.610111
Aco012467	167.672	128.6	150.405	120.967	152.996	138.209	140.562	164.965	134.225	162.741	189.372	178.247	246.029	255.554	262.985	250.109	249.671	279.569	241.685	214.657	244.071	2627.84	2856.61	-0.120731	0.447319	0.66368	2520.73	2507.97	0.00713555	0.964468	0.974624	3197.36	2645.05	0.273411	0.0537344	0.0911511	2353.68	2159.48	0.12439	0.399595	0.502734	2996.57	2270.73	0.400462	0.00158333	0.00382	2659.77	2164.21	0.29756
Aco014902	45.9105	55.3488	53.5213	65.4021	75.9623	70.9178	95.759	101.799	123.338	119.651	124.166	107.847	58.1579	70.491	65.6967	103.174	99.2783	113.189	138.966	114.323	132.847	2937.79	2146.99	0.452284	0.000441282	0.00357149	3995.09	1886.89	1.08243	1.27e-11	7.73e-11	4600.62	1990.06	1.20919	5.45e-22	5.38e-21	3730.24	2414.21	0.628071	1.33e-05	4.65e-05	4312.55	2538.52	0.76494	3.6e-12	2.21e-11	3828.29	3430.22	0.158247
Aco015473	89.0472	79.8166	80.0917	85.0524	65.7481	81.5209	173.335	193.145	176.983	216.33	212.59	198.868	114.796	120.306	130.198	139.805	136.721	129.982	142.119	136.909	155.905	2187.31	2351.72	-0.104085	0.469141	0.681432	4603.03	2065.48	1.15611	2.48e-23	3.27e-22	5589.43	2178.17	1.35964	6.62e-41	1.5e-39	4297.98	1797.34	1.2573	1.34e-19	1.74e-18	5239.56	1889.74	1.47066	2.44e-33	4.87e-32	4651.41	3952.17	0.235089
Aco005490	323.154	343.185	300.153	421.398	580	465.322	344.199	314.823	287.105	318.789	312.642	331.375	314.479	300.576	279.14	158.377	183.762	179.283	246.599	217.243	222.132	5975.04	3947.23	0.598	0.000118775	0.00117826	3465.57	3468.25	-0.00116975	0.992879	0.995472	3707.7	3657.21	0.0198785	0.846452	0.888707	3236.03	4910.53	-0.601595	0.000122713	0.000373221	3475.31	5163.48	-0.570997	2.44e-05	7.68e-05	3085.16	2976.15	0.0520793
Aco021428	30.1653	32.5873	37.8941	36.7374	35.5341	35.8263	39.7401	33.0338	45.649	35.3112	33.823	34.6169	32.3802	30.8121	30.6191	36.2734	33.2914	37.4718	46.2036	43.931	42.0222	3712.44	3465.19	0.0992758	0.419663	0.639294	3659.94	3044.48	0.265658	0.130655	0.205103	3369.04	3211.5	0.0689324	0.57693	0.675999	3417.42	3050.84	0.163852	0.267325	0.366374	3158.06	3207.77	-0.0225527	0.793367	0.849652	2803.6	3143.13	-0.165096
Aco022852	35.9245	41.1522	36.9859	49.6667	50.2908	44.8688	31.1384	33.6493	30.2255	46.6076	47.9493	41.6496	44.9715	48.4795	48.6635	41.2999	44.9103	44.8875	46.5482	47.6873	45.8762	4163.05	3287.22	0.340699	0.00253075	0.0151214	2456.22	2888.77	-0.233941	0.0534488	0.0935182	3701.41	3046.37	0.281275	0.0150705	0.0287909	2293.46	3421.5	-0.576966	1.01e-06	4.11e-06	3469.69	3597.42	-0.0517355	0.627931	0.714907	3080.1	2108.98	0.54667
Aco019068	128.337	123.617	147.873	102.567	106.456	110.783	141.657	151.106	179.357	146.908	132.016	132.316	140.954	142.337	158.239	147.656	154.62	186.66	155.029	131.693	161.993	2799.9	3509.91	-0.326189	0.00571396	0.0292544	3718.78	3083.02	0.27054	0.0755716	0.127378	3403.58	3252.06	0.0655604	0.582848	0.679518	3472.26	2300.76	0.593941	1.03e-05	3.66e-05	3190.74	2419.2	0.39935	5.6e-05	0.000167596	2832.8	3192.98	-0.172881
Aco016243	49.231	57.7291	57.9556	101.322	98.9201	98.4955	49.5618	53.3357	47.6938	24.392	31.2143	32.7051	52.3548	57.5267	49.1417	48.6568	51.5758	40.7439	27.901	29.5194	26.9306	7093.87	3925.81	0.853565	2.95e-15	3.49e-13	3216.16	3449.96	-0.101288	0.426418	0.546692	1984	3638.71	-0.875229	2.57e-08	1e-07	3003.05	5829.7	-0.957065	1.55e-19	2.01e-18	1859.07	6129.58	-1.72149	1.43e-40	3.74e-39	1649.97	2761.51	-0.743211
Aco000070	66.0158	73.3019	71.2589	77.3081	75.0101	72.9954	87.9474	85.6128	95.8045	77.6757	86.3366	83.9135	78.7438	78.8754	84.6503	83.1467	81.2628	74.2421	81.9014	79.7933	80.673	3535.87	3313.3	0.0937632	0.331561	0.556102	3802.95	2911.4	0.385581	0.000880457	0.00220291	3679.57	3070.48	0.261084	0.0134139	0.0258752	3550.93	2905.84	0.289448	0.00983608	0.0210053	3448.62	3055.28	0.174769	0.067133	0.114595	3061.14	3265.56	-0.0934284
Aco011412	132.921	97.7305	100.42	119.127	126.363	126.248	116.319	114.174	107.187	128.127	130.74	124.938	113.413	107.048	102.967	92.7707	115.25	93.8926	94.4914	97.524	99.7021	4156.7	3714.99	0.162063	0.302201	0.526947	3396.03	3261.32	0.0583243	0.72249	0.8011	4057.71	3438.97	0.238682	0.112062	0.173725	3171.04	3415.79	-0.107355	0.316805	0.419583	3803.47	3591.62	0.0827912	0.346435	0.458109	3376.4	2916.21	0.211592
Aco025854	203.813	48.8948	32.8616	54.6495	112.227	67.2584	89.6956	73.0653	69.302	61.6413	77.0989	83.3868	201.939	140.647	141.765	40.3241	92.5037	37.8043	49.203	37.1932	49.24	3424.94	4202.99	-0.295363	0.734102	0.864003	3051.25	3679.54	-0.270135	0.742554	0.814564	3071.91	3876.37	-0.33558	0.687916	0.769034	2849.2	2815.15	0.0175829	0.942439	0.959557	2878.48	2960.34	-0.0401738	0.862878	0.904552	2554.77	2620.65	-0.0366685
Aco001868	137.873	194.567	149.866	253.812	241.835	181.071	228.318	212.59	150.333	125.024	207.838	194.093	173.627	149.373	134.475	177.838	145.638	148.597	286.382	221.543	170.521	4606.86	3290.79	0.485321	0.0113803	0.0504287	3618.86	2893.42	0.322722	0.139234	0.216611	3394.74	3051	0.154053	0.494955	0.602625	3379.24	3787.01	-0.16439	0.397593	0.50085	3180.29	3981.42	-0.324046	0.100967	0.163654	2821.99	3107.86	-0.139093
Aco004280	198.058	175.637	184.235	302.715	274.927	267.926	377.557	512.586	370.925	375.901	427.244	344.656	364.519	371.495	380.334	313.343	256.927	236.757	547.852	562.895	492.62	3060.79	2025.89	0.595216	2.19e-07	5.13e-06	4104.42	1779.25	1.20583	2.06e-12	1.33e-11	3928.73	1876.41	1.06614	4.77e-17	3.58e-16	3832.36	2515.5	0.607376	0.00012681	0.000385021	3682.48	2644.79	0.477735	5.49e-05	0.00016458	3268.71	3523.43	-0.108117
Aco006475	217.668	249.352	238.338	279.326	228.876	272.694	153.132	201.874	151.376	159.56	155.463	155.768	91.3519	86.2619	93.4233	78.2732	89.0645	68.8087	33.6769	35.4024	33.6623	6589.6	5968.61	0.142993	0.253576	0.471728	3842.85	5245.01	-0.448786	0.00562395	0.0122194	3756.98	5531.57	-0.558052	2.16e-08	8.52e-08	3588.13	5414.8	-0.593823	0.00014649	0.000440316	3521.68	5693.24	-0.693206	1.36e-10	7.33e-10	3126.37	3298.97	-0.0774729
Aco011012	98.7163	119.855	132.664	39.8125	40.2995	47.3047	72.7112	75.8887	72.2991	62.1411	61.7258	64.1392	81.0151	80.4626	78.5345	20.8285	15.0519	22.5479	67.365	69.8034	62.8185	2349.57	6491.91	-1.46601	6.13e-22	1.81e-19	3664	5705.15	-0.63889	1.69e-05	5.45e-05	3278.39	6018.12	-0.876405	2.96e-10	1.37e-09	3421.2	1930.48	0.825106	1.65e-11	1.12e-10	3072.91	2029.92	0.597587	4.53e-08	1.94e-07	2727.91	3146.1	-0.205823
Aco016389	59.1711	64.2416	60.1573	55.4871	52.5971	53.8206	163.643	161.058	162.105	184.991	176.949	185.613	62.1767	62.5101	78.1248	179.927	165.065	183.443	221.366	160.178	155.602	1650.98	1877.07	-0.184834	0.0655714	0.188362	4465.45	1649.33	1.43715	1.17e-45	4.26e-44	5279.6	1739.35	1.60208	4.83e-66	2.23e-64	4169.57	1356.75	1.61964	3.77e-54	2.38e-52	4948.89	1426.53	1.79441	1.96e-89	1.9e-87	4393.42	3834.47	0.196289
Aco008437	54.9384	67.6839	66.7254	81.0768	56.2092	60.7422	283.851	346.532	305.987	253.204	268.256	243.547	58.291	57.7356	59.1904	180.761	108.762	133.42	320.36	282.978	216.814	1564.47	1499.85	0.0610551	0.738397	0.866177	6654.68	1318.2	2.33588	1.35e-54	6.68e-53	5716.14	1390.32	2.03974	2.35e-58	8.88e-57	6213.58	1285.81	2.27255	5.75e-42	2.27e-40	5357.93	1351.79	1.98656	1.07e-41	2.95e-40	4756.16	5713.21	-0.264483
Aco015291	129.948	157.248	166.573	160.933	182.433	223.243	89.8742	110.944	102.166	113.761	96.1926	90.4065	50.1097	53.046	58.4195	87.0136	109.67	81.6586	105.026	77.3334	77.7009	6283.41	5043.84	0.317106	0.0587378	0.174419	3021.89	4432.64	-0.552658	0.000424281	0.00111612	3148.09	4675.54	-0.570553	0.000138144	0.000359809	2821.57	5162.08	-0.871503	3.39e-08	1.65e-07	2951.61	5428.32	-0.879021	2.7e-09	1.29e-08	2620.68	2594.33	0.0146056
Aco005262	86.5126	96.3638	86.6286	100.954	109.164	114.125	118.722	138.759	118.697	164.776	145.832	147.211	88.8728	102.069	96.2224	252.931	237.856	279.833	300.103	240.873	256.543	2579.39	2149.66	0.26323	0.0197492	0.0772359	2691.12	1888.98	0.510745	9.42e-05	0.00027368	3442.74	1992.01	0.789641	1.16e-12	6.54e-12	2512.77	2119.5	0.245446	0.0538096	0.0949277	3227.5	2228.65	0.534225	5.18e-07	1.97e-06	2865.48	2310.5	0.310665
Aco025044	64.0661	66.829	62.2168	55.3626	49.0602	61.1374	59.9198	60.6587	56.2313	61.889	57.1493	56.105	77.6311	73.9383	80.4249	78.7103	86.9866	75.3091	83.3466	71.1262	71.8787	3022.23	3535.65	-0.22582	0.0672264	0.191678	2903.42	3106.42	-0.0975037	0.347733	0.465247	3022.97	3275.87	-0.115669	0.231706	0.324586	2711.05	2483.18	0.126143	0.325908	0.429158	2833.88	2611.01	0.117723	0.311288	0.420867	2515.91	2493.11	0.0133518
Aco016427	23.5235	25.8356	28.8379	29.0402	32.4746	31.2655	39.0505	33.5173	41.3759	37.3049	33.0991	40.4749	27.8293	28.1684	28.2671	42.2346	39.6464	39.8208	42.0879	46.9789	39.7268	3327.31	2811.05	0.24299	0.0500591	0.154867	3676.32	2469.88	0.573804	0.000128804	0.000365917	3759.69	2605.27	0.528946	0.000105752	0.000279459	3432.74	2734.27	0.328401	0.013156	0.027251	3524.12	2875.04	0.293639	0.0107882	0.0221975	3128.72	3157.17	-0.0132839
Aco009035	80.9442	76.0858	94.4427	97.5494	99.0289	103.037	85.8666	92.8026	97.5444	87.0874	81.5042	81.8266	95.661	90.3317	95.881	94.7799	91.0889	91.1315	131.614	131.103	122.63	3825.59	3219.62	0.248608	0.0440765	0.141159	3172.55	2827.86	0.165865	0.229396	0.331112	3022.94	2983.01	0.0189741	0.877292	0.91298	2962.27	3143.64	-0.0855996	0.446938	0.549978	2833.76	3305.44	-0.22216	0.014046	0.0282014	2515.76	2723.99	-0.114899
Aco012234	67.0234	72.8656	81.0589	77.5291	88.0354	77.2669	18.6633	15.401	12.8266	16.7528	17.9398	21.0936	70.3826	67.0818	67.2595	29.5907	45.465	34.8944	17.2289	19.7815	17.4585	6375.58	5814.83	0.132601	0.284042	0.506334	1107.06	5109	-2.20693	6.98e-35	1.66e-33	1385.25	5388.99	-1.96036	3.63e-43	8.8e-42	1033.77	5239.7	-2.34221	1.93e-47	9.43e-46	1298.19	5509.34	-2.08576	5.28e-62	2.69e-60	1152.35	950.845	0.277715
Aco007963	83.3446	93.1279	94.5665	107.553	113.097	110.239	100.509	101.042	94.9189	101.339	91.1712	97.2284	82.9373	79.6202	82.2349	110.418	99.6313	89.0896	135.176	126.853	111.397	4086.22	3355.54	0.28411	0.0050377	0.0265119	3292.86	2948.5	0.15927	0.156169	0.238906	3382.64	3109.78	0.121304	0.260362	0.35875	3074.69	3357.98	-0.127162	0.224943	0.319332	3170.96	3530.79	-0.154988	0.0984229	0.16016	2815.21	2827.54	-0.0062282
Aco020903	125.251	36.541	26.7199	57.3074	49.5048	45.0007	94.7348	106.463	107.624	89.9401	89.1182	87.6734	176.916	172.306	179.469	124.565	185.89	95.6957	113.9	124.994	127.575	1766.05	2207.01	-0.321564	0.638743	0.804259	3231.73	1933.03	0.741444	0.273231	0.382075	2934.04	2036.7	0.526654	0.43411	0.546922	3017.52	1451.56	1.0561	7.06e-14	5.87e-13	2750.25	1526.1	0.850042	1.89e-12	1.18e-11	2441.5	2774.71	-0.184734
Aco016590	101.729	112.344	86.8907	155.862	152.974	131.461	277.262	252.632	128.609	107.274	133.003	81.1597	154.808	135.143	140.098	517.335	445.939	472.564	423.876	392.597	318.462	2425.57	1662.69	0.544909	0.00026883	0.00235615	3260.73	1461.13	1.15806	5.05e-05	0.000152065	1673.99	1540.55	0.120358	0.557346	0.658721	3044.93	1993.62	0.610907	0.0131024	0.0271451	1569.15	2096.07	-0.417102	0.0188333	0.0367899	1392.74	2800.5	-1.00757
Aco023603	142.634	131.981	197.915	43.9228	55.4885	68.7807	37.0229	45.5102	44.0105	39.4877	30.2988	34.2467	190.641	164.15	209.256	56.5307	77.839	102.004	58.5926	46.8009	54.4497	2219.34	6250.48	-1.49373	1.04e-11	6.55e-10	1501.8	5489.45	-1.86992	2.17e-21	2.59e-20	1297.43	5791.99	-2.15848	7.4e-30	1.06e-28	1402.24	1823.15	-0.378799	0.0416996	0.0759217	1216.45	1917.27	-0.656641	0.000238891	0.000651068	1080.13	1289.31	-0.255672
Aco023269	466.465	150.287	151.847	230.909	348.13	242.23	178.18	132.902	183.773	166.651	205.576	206.238	113.727	102.024	110.737	106.595	138.937	122.019	71.9416	68.6804	79.1294	5900.05	5550.91	0.087979	0.873154	0.940446	3197.78	4863.43	-0.6049	0.142764	0.221369	3929.46	5125.74	-0.383441	0.522658	0.628736	2985.95	4849.42	-0.699393	0.000416505	0.00116161	3682.28	5099.19	-0.469476	0.00637048	0.0137619	3268.23	2746.53	0.250776
Aco014884	63.3005	88.9527	61.4117	71.7786	93.8349	69.4134	260.35	288.848	275.665	164.493	157.306	170.518	64.3211	53.6635	54.4015	146.044	118.12	156.398	222.239	194.061	215.947	2130.73	1941.19	0.134285	0.507369	0.712218	6724.08	1706.88	1.97834	5.45e-27	8.79e-26	4219.08	1799.61	1.2296	6.83e-13	3.92e-12	6278.44	1751.3	1.84269	3.97e-34	1.12e-32	3954.71	1841.44	1.10351	2.09e-15	1.63e-14	3510.81	5773.29	-0.717716
Aco008029	29.9637	28.9239	33.0387	39.4132	36.1712	36.9562	88.1071	84.9413	89.53	99.8266	94.56	118.614	40.3447	40.8421	43.5966	92.2039	76.623	87.3691	79.7083	77.8389	74.0606	2153.46	1763.97	0.287594	0.0102225	0.0465386	4520.11	1549.46	1.54431	1.3e-43	4.32e-42	5664.75	1634.32	1.79297	1.59e-40	3.57e-39	4220.61	1769.71	1.25389	7.12e-31	1.79e-29	5309.27	1860.71	1.51244	8.37e-37	1.93e-35	4713.28	3881.46	0.279957
Aco006696	81.1695	102.704	104.11	112.197	117.6	103.433	97.25	101.624	83.7189	74.993	79.8993	95.1156	69.5111	60.6509	63.8281	65.6771	59.147	56.0075	85.645	81.7215	68.9999	4882.39	4228.76	0.207198	0.136524	0.315118	3723.19	3716.74	0.00240147	0.987941	0.991774	3464.63	3920.28	-0.178405	0.25925	0.357463	3476.53	4012.68	-0.206906	0.107611	0.172928	3246.88	4219.05	-0.377917	0.0023657	0.00552587	2882.11	3196.98	-0.149638
Aco006480	54.5646	57.765	58.8305	63.9918	64.8709	68.2771	70.6255	60.589	62.0324	74.6957	72.8848	68.8825	67.1951	64.381	73.6693	76.4832	79.2785	77.3129	105.673	84.0171	86.543	3397.55	2957.74	0.200103	0.0332005	0.114792	2995.95	2598.66	0.205083	0.090328	0.148596	3527.03	2740.74	0.363983	0.00011571	0.000304201	2797.51	2791.86	0.00267614	0.982192	0.987104	3306.25	2935.57	0.171544	0.0622552	0.107218	2935.14	2572.97	0.190263
Aco014328	55.0393	30.2904	30.3002	29.552	45.5524	33.1682	103.927	107.189	108.202	72.0888	70.1332	78.4796	106.877	110.584	154.823	78.9389	106.019	79.5281	104.11	96.6285	95.2491	1664.35	1784.41	-0.100771	0.718451	0.855215	4413.4	1565.42	1.49534	3.47e-09	1.67e-08	3206.85	1650.35	0.958327	6.85e-05	0.000185334	4120.94	1367.9	1.59179	6.89e-20	9.17e-19	3005.77	1438.38	1.06406	1.46e-10	7.8e-10	2668.33	3789.6	-0.506337
Aco016577	67.1679	59.4614	68.3894	44.44	47.0156	54.3367	109.585	107.648	128.352	95.0311	99.9956	101.779	73.5056	75.982	83.8207	92.86	87.3659	90.7552	105.691	104.838	112.865	2099.56	2816.82	-0.423771	0.00151895	0.00991653	4477.75	2473.81	0.856028	3.4e-10	1.82e-09	4042.2	2609.2	0.631233	3.9e-09	1.65e-08	4180.98	1725.05	1.27701	5.61e-20	7.56e-19	3788.62	1813.94	1.06201	5.43e-21	5.96e-20	3363.09	3844.94	-0.193403
Aco008202	111.446	116.736	121.604	93.4132	71.6988	94.2497	178.184	201.335	223.353	212.172	212.082	182.038	102.944	107.838	110.506	149.108	143.621	158.006	152.362	151.699	185.052	2203.77	2980.84	-0.435199	0.00269344	0.0158954	4609.53	2618.88	0.815801	1.51e-09	7.56e-09	4871.38	2762.12	0.818647	2.15e-13	1.28e-12	4303.95	1810.76	1.24869	1.51e-15	1.44e-14	4566.62	1903.89	1.26162	2.09e-20	2.22e-19	4053.99	3957.6	0.0346384
Aco022312	9.22439	13.4467	14.6079	11.4219	13.9759	16.9366	20.7623	14.6669	20.4802	11.0543	6.38533	16.8615	18.9017	15.8101	17.253	21.264	16.6532	23.3809	23.0956	23.5316	18.311	3117.34	2750.25	0.180827	0.407951	0.628482	3704.66	2417.79	0.615643	0.00755408	0.0160024	2389.21	2550.59	-0.0944896	0.768325	0.824629	3459.29	2560.95	0.433666	0.0242737	0.0470412	2239.22	2693.1	-0.266401	0.529355	0.631127	1988.36	3182.05	-0.678486
Aco009577	20.144	17.1176	18.7659	20.4958	26.0956	22.3885	176.449	143.148	127.076	94.8861	119.863	129.735	9.86426	11.1766	10.6857	139.214	94.6986	68.7542	167.39	127.202	87.8111	1170.09	953.123	0.295004	0.0541494	0.164249	6813.16	836.997	3.02476	9.9e-72	7.84e-70	5527.16	882.729	2.64619	5.47e-63	2.33e-61	6362.07	961.591	2.72648	3.54e-61	2.77e-59	5179.08	1011.11	2.35735	1.79e-54	7.35e-53	4596.61	5851.78	-0.348272
Aco002097	58.1486	82.2682	65.6003	125.339	125.835	114.948	144.469	171.983	161.252	139.416	140.816	135.527	51.8984	57.3478	46.9061	89.1193	87.2311	85.8602	89.4695	79.4673	78.5122	4557.31	2570.17	0.826437	1.23e-07	3.05e-06	5347.91	2259.79	1.24301	1.09e-12	7.18e-12	4893.05	2382.96	1.03823	1.25e-11	6.55e-11	4993.42	3745.45	0.415099	0.000604484	0.00163431	4586.51	3938.04	0.220215	0.0157279	0.0312948	4071.55	4591.4	-0.173412
Aco007569	159.102	89.1464	90.9466	110.334	132.322	116.059	131.959	141.135	139.804	112.073	124.516	122.811	161.933	137.504	149.125	99.2742	119.61	92.4715	118.438	123.007	110.771	3562.22	3382.17	0.0747538	0.757535	0.876882	3687.52	2967.23	0.313538	0.201789	0.297262	3374.77	3128.32	0.10937	0.637412	0.724615	3443.14	2927.49	0.234407	0.0583591	0.102175	3162.92	3078.21	0.0394581	0.729612	0.800837	2807.54	3166.2	-0.173586
Aco018391	101.577	121.826	112.423	130.67	97.7964	112.644	346.575	390.241	355.206	396.731	484.564	382.423	110.323	128.053	125.314	321.028	290.832	301.045	372.548	381.691	337.045	1684.05	1662.51	0.0190605	0.901657	0.955476	4850.01	1461.12	1.73111	1.08e-40	3.3e-39	5901.23	1540.92	1.93744	2.76e-41	6.28e-40	4528.58	1383.94	1.70986	8.7e-33	2.34e-31	5530.93	1455.04	1.92612	1.22e-40	3.21e-39	4909.13	4164.18	0.237522
[truncated: 27,878 more rows]
[truncated: 25 more columns]
