# Supplementary material for: Metabolomic and transcriptomic analyses reveal the mechanism of sweet-acidic taste formation during pineapple fruit development
Source: Front Plant Sci. 2022 Sep 8;13:971506. doi: 10.3389/fpls.2022.971506 (PMC9493369; doi:10.3389/fpls.2022.971506)
Supplement: Supplementary file 5 [file Table_5.XLSX]

## Sheet: 56 amino acids and derivatives
Index	Q1 (Da)	Molecular Weight (Da)	Formula	Ionization model	Compounds	Class I	Class II
Qingke_Rfmb319-1-2	130.09	129.079	C6H11NO2	[M+H]+	Pipecolic acid	Amino acids and derivatives	Amino acids and derivatives
Qingke_Rfmb320-1-3	144.1	143.095	C7H13NO2	[M+H]+	1,2-N-Methylpipecolic acid	Amino acids and derivatives	Amino acids and derivatives
mws0001	133.06	132.054	C4H8N2O3	[M+H]+	L-Asparagine Anhydrous	Amino acids and derivatives	Amino acids and derivatives
mws0193	190.12	189.111	C7H15N3O3	[M+H]+	L-Homocitrulline	Amino acids and derivatives	Amino acids and derivatives
mws0216	132.07	131.058	C5H9NO3	[M+H]+	Trans-4-Hydroxy-L-proline	Amino acids and derivatives	Amino acids and derivatives
mws0219	132.03	133.038	C4H7NO4	[M-H]-	L-AsparticAcid	Amino acids and derivatives	Amino acids and derivatives
mws0227	132.1	131.095	C6H13NO2	[M+H]+	L-Leucine	Amino acids and derivatives	Amino acids and derivatives
mws0230	120.07	119.058	C4H9NO3	[M+H]+	L-(-)-Threonine	Amino acids and derivatives	Amino acids and derivatives
mws0250	182.08	181.074	C9H11NO3	[M+H]+	L-(-)-Tyrosine	Amino acids and derivatives	Amino acids and derivatives
mws0254	156.08	155.069	C6H9N3O2	[M+H]+	L-Histidine	Amino acids and derivatives	Amino acids and derivatives
mws0256	118.09	117.079	C5H11NO2	[M+H]+	L-Valine	Amino acids and derivatives	Amino acids and derivatives
mws0258	132.1	131.095	C6H13NO2	[M+H]+	L-Isoleucine	Amino acids and derivatives	Amino acids and derivatives
mws0260	175.12	174.112	C6H14N4O2	[M+H]+	L-(+)-Arginine	Amino acids and derivatives	Amino acids and derivatives
mws0279	170.09	169.085	C7H11N3O2	[M+H]+	3-N-Methyl-L-histidine	Amino acids and derivatives	Amino acids and derivatives
mws0282	203.08	204.09	C11H12N2O2	[M-H]-	L-Tryptophan	Amino acids and derivatives	Amino acids and derivatives
mws0582	322.11	321.099	C11H19N3O6S	[M+H]+	S-(methyl)glutathione	Amino acids and derivatives	Amino acids and derivatives
mws0629	281.11	280.106	C13H16N2O5	[M+H]+	Asp-phe	Amino acids and derivatives	Amino acids and derivatives
mws0636	313.15	312.147	C18H20N2O3	[M+H]+	Phe-Phe	Amino acids and derivatives	Amino acids and derivatives
mws0736	189.12	188.116	C8H16N2O3	[M+H]+	N-Glycyl-L-leucine	Amino acids and derivatives	Amino acids and derivatives
mws0890	104.04	105.043	C3H7NO3	[M-H]-	L-Serine	Amino acids and derivatives	Amino acids and derivatives
mws0923	200.05	199.04	C9H10ClNO2	[M+H]+	L-2-chlorophenylalanine	Amino acids and derivatives	Amino acids and derivatives
mws1050	148.06	147.053	C5H9NO4	[M+H]+	O-Acetylserine	Amino acids and derivatives	Amino acids and derivatives
mws1587	132.1	131.095	C6H13NO2	[M+H]+	α-Aminocaproic acid	Amino acids and derivatives	Amino acids and derivatives
mws4134	611.14	612.152	C20H32N6O12S2	[M-H]-	Oxidized Glutathione	Amino acids and derivatives	Amino acids and derivatives
mws4176	237.12	236.116	C12H16N2O3	[M+H]+	Alanylphenylalanine	Amino acids and derivatives	Amino acids and derivatives
mws5035	279.17	278.163	C15H22N2O3	[M+H]+	Leucylphenylalanine	Amino acids and derivatives	Amino acids and derivatives
mws5037	203.14	202.132	C9H18N2O3	[M+H]+	Alanylleucine	Amino acids and derivatives	Amino acids and derivatives
mws5041	189.12	188.116	C8H16N2O3	[M+H]+	Glycylisoleucine	Amino acids and derivatives	Amino acids and derivatives
mws5042	223.11	222.1	C11H14N2O3	[M+H]+	Glycylphenylalanine	Amino acids and derivatives	Amino acids and derivatives
pmb2591	245.09	246.1	C13H14N2O3	[M-H]-	Acetyltryptophan	Amino acids and derivatives	Amino acids and derivatives
pme0006	116.07	115.063	C5H9NO2	[M+H]+	L-Proline	Amino acids and derivatives	Amino acids and derivatives
pme0008	176.1	175.096	C6H13N3O3	[M+H]+	L-Citrulline	Amino acids and derivatives	Amino acids and derivatives
pme0014	148.06	147.053	C5H9NO4	[M+H]+	L-Glutamic acid	Amino acids and derivatives	Amino acids and derivatives
pme0021	166.09	165.07	C9H11NO2	[M+H]+	L-Phenylalanine	Amino acids and derivatives	Amino acids and derivatives
pme0026	147.11	146.106	C6H14N2O2	[M+H]+	L-(+)-Lysine	Amino acids and derivatives	Amino acids and derivatives
pme0122	189.12	188.116	C8H16N2O3	[M+H]+	N6-Acetyl-L-lysine	Amino acids and derivatives	Amino acids and derivatives
pme0128	159.08	160.085	C6H12N2O3	[M-H]-	AlanylAlanine	Amino acids and derivatives	Amino acids and derivatives
pme0137	187.07	188.08	C7H12N2O4	[M-H]-	N-α-Acetyl-L-glutamine	Amino acids and derivatives	Amino acids and derivatives
pme0170	217.13	216.122	C8H16N4O3	[M+H]+	N-α-Acetyl-L-arginine	Amino acids and derivatives	Amino acids and derivatives
pme0181	170.09	169.085	C7H11N3O2	[M+H]+	1-Methylhistidine	Amino acids and derivatives	Amino acids and derivatives
pme0193	147.08	146.069	C5H10N2O3	[M+H]+	L-Glutamine	Amino acids and derivatives	Amino acids and derivatives
pme0253	174.11	173.105	C8H15NO3	[M+H]+	N-Acetyl-L-leucine	Amino acids and derivatives	Amino acids and derivatives
pme0278	191.1	190.095	C7H14N2O4	[M+H]+	2,6-Diaminooimelic acid	Amino acids and derivatives	Amino acids and derivatives
pme1002	138.09	137.084	C8H11NO	[M+H]+	L-Tyramine	Amino acids and derivatives	Amino acids and derivatives
pme1086	306.08	307.084	C10H17N3O6S	[M-H]-	Glutathione reduced form	Amino acids and derivatives	Amino acids and derivatives
pme1210	150.06	149.051	C5H11NO2S	[M+H]+	L-Methionine	Amino acids and derivatives	Amino acids and derivatives
pme1228	221.09	220.085	C11H12N2O3	[M+H]+	5-Hydroxy-L-tryptophan	Amino acids and derivatives	Amino acids and derivatives
pme1286	385.13	384.122	C14H20N6O5S	[M+H]+	S-(5'-Adenosy)-L-homocysteine	Amino acids and derivatives	Amino acids and derivatives
pme1419	164.07	199.043	C6H14ClNO2S	[M-Cl]+	L-Methionine methyl ester	Amino acids and derivatives	Amino acids and derivatives
pme2122	112.09	111.08	C5H9N3	[M+H]+	Histamine	Amino acids and derivatives	Amino acids and derivatives
pme2743	194.08	193.074	C10H11NO3	[M+H]+	N-Phenylacetylglycine	Amino acids and derivatives	Amino acids and derivatives
pme2890	269.06	268.055	C8H16N2O4S2	[M+H]+	L-Homocystine	Amino acids and derivatives	Amino acids and derivatives
pme3017	104.07	103.063	C4H9NO2	[M+H]+	2-Aminoisobutyric acid	Amino acids and derivatives	Amino acids and derivatives
pme3033	104.07	103.063	C4H9NO2	[M+H]+	N,N-Dimethylglycine	Amino acids and derivatives	Amino acids and derivatives
pme3388	189.13	188.127	C7H16N4O2	[M+H]+	H-HomoArg-OH	Amino acids and derivatives	Amino acids and derivatives
pme3827	198.08	197.069	C9H11NO4	[M+H]+	3,4-Dihydroxyphenylalanine	Amino acids and derivatives	Amino acids and derivatives

## Sheet: 81 phenolic acids
Index	Q1 (Da)	Molecular Weight (Da)	Formula	Ionization model	Compounds	Class I	Class II
Huasheng_mad1424	427.05	426.043	C17H14O13	[M+H]+	Ditartaroyl-hydroxylcoumarin	Phenolic acids	Phenolic acids
Lmhn002573	399.09	400.101	C17H20O11	[M-H]-	Sinapoylglucuronic acid	Phenolic acids	Phenolic acids
Lmhn002926	279.05	280.058	C13H12O7	[M-H]-	p-Coumaroylmalic acid	Phenolic acids	Phenolic acids
Lmhn003074	309.06	310.069	C14H14O8	[M-H]-	Feruloylmalic acid	Phenolic acids	Phenolic acids
Lmhn003240	237.04	238.048	C11H10O6	[M-H]-	Benzoylmalic acid	Phenolic acids	Phenolic acids
Lmnp001551	167.07	166.063	C9H10O3	[M+H]+	3-Methoxy-4-hydroxy-acetophenone	Phenolic acids	Phenolic acids
Lmtn002565	329.11	330.095	C14H18O9	[M-H]-	1'-O-Vanilloyl-β-D-glucoside	Phenolic acids	Phenolic acids
Zmhn001883	329.09	330.095	C14H18O9	[M-H]-	Vanillic acid glycoside	Phenolic acids	Phenolic acids
Zmhn001926	299.08	300.084	C13H16O8	[M-H]-	Salicylic acid O-glycoside	Phenolic acids	Phenolic acids
Zmhn002227	385.11	386.121	C17H22O10	[M-H]-	Sinapic acid-glycoside	Phenolic acids	Phenolic acids
Zmhn002242	341.09	342.095	C15H18O9	[M-H]-	Caffeoyl glucose	Phenolic acids	Phenolic acids
Zmhn002301	325.09	326.1	C15H18O8	[M-H]-	p-Coumaric acid-O-glycoside	Phenolic acids	Phenolic acids
Zmhn002422	355.1	356.11	C16H20O9	[M-H]-	Feruloyl glucose	Phenolic acids	Phenolic acids
Zmhn002513	385.11	386.121	C17H22O10	[M-H]-	Isosinapic acid-hexoside	Phenolic acids	Phenolic acids
Zmxn001997	299.08	300.084	C13H16O8	[M-H]-	Isosalicylic acid O-glycoside	Phenolic acids	Phenolic acids
mws0014	193.05	194.058	C10H10O4	[M-H]-	Ferulic acid	Phenolic acids	Phenolic acids
mws0027	197.05	198.053	C9H10O5	[M-H]-	Syringic acid	Phenolic acids	Phenolic acids
mws0028	167.03	168.042	C8H8O4	[M-H]-	Vanillic acid	Phenolic acids	Phenolic acids
mws0178	353.09	354.095	C16H18O9	[M-H]-	Chlorogenic acid	Phenolic acids	Phenolic acids
mws0179	367.1	368.111	C17H20O9	[M-H]-	Chlorogenic acid methyl ester	Phenolic acids	Phenolic acids
mws0458	151.04	152.047	C8H8O3	[M-H]-	Vanillin	Phenolic acids	Phenolic acids
mws0628	121.03	122.037	C7H6O2	[M-H]-	4-Hydroxybenzaldehyde	Phenolic acids	Phenolic acids
mws0853	209.08	210.089	C11H14O4	[M-H]-	Sinapyl alcohol	Phenolic acids	Phenolic acids
mws0898	165.09	164.084	C10H12O2	[M+H]+	Isoeugenol	Phenolic acids	Phenolic acids
mws0921	149.06	150.068	C9H10O2	[M-H]-	p-Coumaryl alcohol	Phenolic acids	Phenolic acids
mws1024	147.05	148.052	C9H8O2	[M-H]-	p-Coumaraldehyde	Phenolic acids	Phenolic acids
mws1078	138.05	137.048	C7H7NO2	[M+H]+	Anthranilic Acid	Phenolic acids	Phenolic acids
mws1195	179.07	178.063	C10H10O3	[M+H]+	Methyl p-coumarate	Phenolic acids	Phenolic acids
mws1200	177.06	178.063	C10H10O3	[M-H]-	Trans-4-Hydroxycinnamic Acid Methyl Ester	Phenolic acids	Phenolic acids
mws1212	209.08	208.074	C11H12O4	[M+H]+	Methyl ferulate	Phenolic acids	Phenolic acids
mws1336	138.05	137.048	C7H7NO2	[M+H]+	4-Aminobenzoic acid	Phenolic acids	Phenolic acids
mws1350	181.05	182.058	C9H10O4	[M-H]-	Syringic Aldehyde	Phenolic acids	Phenolic acids
mws1354	193.05	194.058	C10H10O4	[M-H]-	Trans-ferulic acid	Phenolic acids	Phenolic acids
mws1503	133.06	132.058	C9H8O	[M+H]+	Cinnamaldehyde	Phenolic acids	Phenolic acids
mws1521	285.1	286.105	C13H18O7	[M-H]-	Salicin	Phenolic acids	Phenolic acids
mws1584	515.12	516.127	C25H24O12	[M-H]-	Cynarin	Phenolic acids	Phenolic acids
mws2108	353.09	354.095	C16H18O9	[M-H]-	Cryptochlorogenic acid	Phenolic acids	Phenolic acids
mws2212	179.03	180.042	C9H8O4	[M-H]-	Caffeic acid	Phenolic acids	Phenolic acids
mws2213	147.05	148.052	C9H8O2	[M-H]-	Cinnamic acid	Phenolic acids	Phenolic acids
mws4085	223.06	224.068	C11H12O5	[M-H]-	Sinapic acid	Phenolic acids	Phenolic acids
pmb0423	193.05	194.058	C10H10O4	[M-H]-	Hydroxy-methoxycinnamate	Phenolic acids	Phenolic acids
pmb0752	369.12	368.111	C17H20O9	[M+H]+	3-O-Feruloyl quinic acid	Phenolic acids	Phenolic acids
pmb2620	207.07	208.074	C11H12O4	[M-H]-	3,4-Dimethoxycinnamic acid	Phenolic acids	Phenolic acids
pmb2871	315.07	316.079	C13H16O9	[M-H]-	2,5-Dihydroxy benzoic acid O-hexside	Phenolic acids	Phenolic acids
pmb2936	591.17	592.179	C28H32O14	[M-H]-	Disinapoyl hexoside	Phenolic acids	Phenolic acids
pmb2940	385.11	386.121	C17H22O10	[M-H]-	1-O-β-D-Glucopyranosyl sinapate	Phenolic acids	Phenolic acids
pmb3068	337.09	338.1	C16H18O8	[M-H]-	1-O-p-Coumaroyl quinic acid	Phenolic acids	Phenolic acids
pmb3072	481.14	482.142	C22H26O12	[M-H]-	3-O-p-coumaroyl shikimic acid O-hexoside	Phenolic acids	Phenolic acids
pmb3074	337.09	338.1	C16H18O8	[M-H]-	3-O-p-Coumaroyl quinic acid	Phenolic acids	Phenolic acids
pmb3107	359.1	360.106	C15H20O10	[M-H]-	Syringic acid O-glucoside	Phenolic acids	Phenolic acids
pme0241	123.04	122.037	C7H6O2	[M+H]+	Benzoic acid	Phenolic acids	Phenolic acids
pme0281	165.02	166.027	C8H6O4	[M-H]-	Terephthalic acid	Phenolic acids	Phenolic acids
pme1439	165.05	164.047	C9H8O3	[M+H]+	p-Coumaric acid	Phenolic acids	Phenolic acids
pme1816	353.09	354.095	C16H18O9	[M-H]-	Neochlorogenic acid(5-O-Caffeoylquinic acid)	Phenolic acids	Phenolic acids
pme3437	213.08	212.068	C10H12O5	[M+H]+	Eudesmic acid(3,4,5-trimethoxybenzoic acid)	Phenolic acids	Phenolic acids
pme3443	207.07	208.074	C11H12O4	[M-H]-	Sinapinaldehyde	Phenolic acids	Phenolic acids
pmf0424	517.13	516.127	C25H24O12	[M+H]+	Isochlorogenic acid B	Phenolic acids	Phenolic acids
pmf0440	163.08	162.068	C10H10O2	[M+H]+	4-MethoxycinnaMaldehyde	Phenolic acids	Phenolic acids
pmn001318	383.11	384.121	C21H20O7	[M-H]-	1,3-O-Di-p-Coumaroyl glycerol	Phenolic acids	Phenolic acids
pmn001319	413.12	414.131	C22H22O8	[M-H]-	1-O-Feruloyl-3-O-p-Coumaroyl glycerol	Phenolic acids	Phenolic acids
pmn001320	237.08	238.084	C12H14O5	[M-H]-	1-O-p-Cumaroylglycerol	Phenolic acids	Phenolic acids
pmn001367	315.07	316.079	C13H16O9	[M-H]-	Protocatechuic acid-4-glucoside	Phenolic acids	Phenolic acids
pmn001419	325.09	326.1	C15H18O8	[M-H]-	1-O-[(E)-p-Cumaroyl]-β-D-glucopyranose	Phenolic acids	Phenolic acids
pmn001420	341.09	342.095	C15H18O9	[M-H]-	1-O-[(E)-Caffeoyl]-β-D-glucopyranose	Phenolic acids	Phenolic acids
pmn001511	285.1	286.105	C13H18O7	[M-H]-	3-Hydroxy-5-Methylphenol-1-Oxy-β-D-Glucose	Phenolic acids	Phenolic acids
pmn001517	329.12	330.131	C15H22O8	[M-H]-	3,4,5-Trimethoxyphenyl-β-D-Glucopyranoside	Phenolic acids	Phenolic acids
pmn001523	473.04	474.043	C21H14O13	[M-H]-	1,3-Trigallic acid	Phenolic acids	Phenolic acids
pmn001612	753.22	754.232	C34H42O19	[M-H]-	β-D-(3-Mustard acyl)-fructosyl-α-D-(6-mustard acyl)glucoside	Phenolic acids	Phenolic acids
pmn001669	237.08	238.084	C12H14O5	[M-H]-	Methyl sinapate	Phenolic acids	Phenolic acids
pmn001671	547.17	548.174	C23H32O15	[M-H]-	β-D-Furanofructosyl-α-D-(6-mustard acyl)glucoside	Phenolic acids	Phenolic acids
pmn001672	547.17	548.174	C23H32O15	[M-H]-	β-D-Furanofructosyl-α-D-(3-mustard acyl)glucoside	Phenolic acids	Phenolic acids
pmn001682	179.03	180.042	C9H8O4	[M-H]-	Sorbic acid	Phenolic acids	Phenolic acids
pmn001695	371.1	372.106	C16H20O10	[M-H]-	Trihydroxycinnamoylquinic acid	Phenolic acids	Phenolic acids
pmn001710	521.13	522.137	C24H26O13	[M-H]-	Rosmarinyl Glucoside	Phenolic acids	Phenolic acids
pmn001714	655.3	328.133	C16H24O7	[2M-H]-	3-Hydroxy-4-isopropylbenzylalchol 3-glucoside	Phenolic acids	Phenolic acids
pmn001738	403.12	404.132	C17H24O11	[M-H]-	Oleoside 11-methyl ester	Phenolic acids	Phenolic acids
pmp000086	269.1	268.095	C13H16O6	[M+H]+	1-Feruloyl-sn-glycerol	Phenolic acids	Phenolic acids
pmp000091	445.15	444.142	C23H24O9	[M+H]+	Glyceryl 1,3-diferulate	Phenolic acids	Phenolic acids
pmp000232	339.11	338.1	C16H18O8	[M+H]+	Cis-3-p-coumaric quinic acid	Phenolic acids	Phenolic acids
pmp001086	127.04	126.032	C6H6O3	[M+H]+	5-Hydroxymethylfurfural	Phenolic acids	Phenolic acids
pmp001285	149.02	148.016	C8H4O3	[M+H]+	Phthalic anhydride	Phenolic acids	Phenolic acids

## Sheet: 31 nucleotides and derivatives
Index	Q1 (Da)	Molecular Weight (Da)	Formula	Ionization model	Compounds	Class I	Class II
mws0248	243.06	244.07	C9H12N2O6	[M-H]-	Uridine	Nucleotides and derivatives	Nucleotides and derivatives
mws0255	112.05	111.043	C4H5N3O	[M+H]+	Cytosine	Nucleotides and derivatives	Nucleotides and derivatives
mws0572	126.07	125.059	C5H7N3O	[M+H]+	5-Methylcytosine	Nucleotides and derivatives	Nucleotides and derivatives
mws0609	344.04	345.047	C10H12N5O7P	[M-H]-	Guanosine 3',5'-cyclic monophosphate	Nucleotides and derivatives	Nucleotides and derivatives
mws0668	283.07	284.076	C10H12N4O6	[M-H]-	Xanthosine	Nucleotides and derivatives	Nucleotides and derivatives
mws0675	335.06	334.057	C11H15N2O8P	[M+H]+	β-Nicotinamide mononucleotide	Nucleotides and derivatives	Nucleotides and derivatives
mws0847	150.08	149.07	C6H7N5	[M+H]+	1-Methyladenine	Nucleotides and derivatives	Nucleotides and derivatives
mws0884	328.05	329.053	C10H12N5O6P	[M-H]-	Cyclic AMP	Nucleotides and derivatives	Nucleotides and derivatives
mws1060	267.07	268.081	C10H12N4O5	[M-H]-	9-(β-D-Arabinofuranosyl)hypoxanthine	Nucleotides and derivatives	Nucleotides and derivatives
pmb0981	348.07	347.063	C10H14N5O7P	[M+H]+	Adenosine 5'-monophosphate	Nucleotides and derivatives	Nucleotides and derivatives
pmb0998	364.07	363.058	C10H14N5O8P	[M+H]+	Guanosine 5'-monophosphate	Nucleotides and derivatives	Nucleotides and derivatives
pmb2922	565.05	566.055	C15H24N2O17P2	[M-H]-	Uridine 5'-diphospho-D-glucose	Nucleotides and derivatives	Nucleotides and derivatives
pme0033	137.05	136.039	C5H4N4O	[M+H]+	Hypoxanthine	Nucleotides and derivatives	Nucleotides and derivatives
pme0040	136.06	135.054	C5H5N5	[M+H]+	Adenine	Nucleotides and derivatives	Nucleotides and derivatives
pme0183	152.06	151.049	C5H5N5O	[M+H]+	2-Hydroxy-6-aminopurine	Nucleotides and derivatives	Nucleotides and derivatives
pme0230	268.1	267.097	C10H13N5O4	[M+H]+	Adenosine	Nucleotides and derivatives	Nucleotides and derivatives
pme0264	243.1	242.09	C10H14N2O5	[M+H]+	Thymidine	Nucleotides and derivatives	Nucleotides and derivatives
pme1109	152.06	151.049	C5H5N5O	[M+H]+	Guanine	Nucleotides and derivatives	Nucleotides and derivatives
pme1173	137.05	136.039	C5H4N4O	[M+H]+	Allopurinol	Nucleotides and derivatives	Nucleotides and derivatives
pme1178	284.1	283.092	C10H13N5O5	[M+H]+	Guanosine	Nucleotides and derivatives	Nucleotides and derivatives
pme1194	228.1	227.091	C9H13N3O4	[M+H]+	Deoxycytidine	Nucleotides and derivatives	Nucleotides and derivatives
pme1474	298.1	297.09	C11H15N5O3S	[M+H]+	5'-Deoxy-5'-(methylthio)adenosine	Nucleotides and derivatives	Nucleotides and derivatives
pme2746	784.15	785.157	C27H33N9O15P2	[M-H]-	Flavin adenine dinucleotide(FAD)	Nucleotides and derivatives	Nucleotides and derivatives
pme3007	402.99	404.002	C9H14N2O12P2	[M-H]-	Uridine 5'-diphosphate	Nucleotides and derivatives	Nucleotides and derivatives
pme3174	324.06	323.052	C9H14N3O8P	[M+H]+	Cytidine 5'-monophosphate(Cytidylic acid)	Nucleotides and derivatives	Nucleotides and derivatives
pme3184	332.08	331.068	C10H14N5O6P	[M+H]+	2'-Deoxyadenosine-5'-monophosphate	Nucleotides and derivatives	Nucleotides and derivatives
pme3188	323.03	324.036	C9H13N2O9P	[M-H]-	Uridine 5'-monophosphate	Nucleotides and derivatives	Nucleotides and derivatives
pme3337	384.12	383.108	C14H17N5O8	[M+H]+	N6-Succinyl Adenosine	Nucleotides and derivatives	Nucleotides and derivatives
pme3732	244.09	243.086	C9H13N3O5	[M+H]+	Cytidine	Nucleotides and derivatives	Nucleotides and derivatives
pme3967	312.13	311.123	C12H17N5O5	[M+H]+	2-(Dimethylamino)guanosine	Nucleotides and derivatives	Nucleotides and derivatives
pme3968	166.07	165.065	C6H7N5O	[M+H]+	7-Methylguanine	Nucleotides and derivatives	Nucleotides and derivatives

## Sheet: 4
Supplementary Table 5: Summary of co-expression gene modules
gene_id	module	gene_chr	gene_start	gene_end	gene_strand	gene_length	gene_biotype	gene_description	tf_family
Aco009983	brown	LG10	1977111	1979106	-	701	-	metallothionein 3	-
Aco013999	turquoise	LG03	632535	633813	+	818	-	Bromelain inhibitor	-
novel.473	cyan	LG07	13848831	13850749	+	1749	-	PF00240:Ubiquitin family	ubiquitin
Aco004356	turquoise	LG05	2467915	2572017	-	3314	-	Cathepsin B-like cysteine proteinase	Peptidase_C1
Aco006050	brown	LG16	9393986	9400574	-	2666	-	BURP domain-containing protein	-
Aco005343	brown	LG11	9257216	9287580	+	4766	-	Cytochrome P450 superfamily protein	p450
Aco011306	turquoise	LG01	12557910	12562420	+	1845	-	F-box/LRR-repeat protein	F-box
Aco013510	turquoise	LG20	857150	860918	-	1638	-	Cathepsin B-like cysteine proteinase	Peptidase_C1
Aco009712	cyan	LG01	150969	156242	-	2823	-	evolutionarily conserved C-terminal region 2	YTH
Aco005846	turquoise	LG16	10941507	10950961	-	2289	-	Vacuolar processing enzyme 1b	-
Aco021907	lightyellow	LG13	4569463	4577784	-	957	-	Cysteine inhibitor	-
Aco016147	turquoise	LG21	1870269	1873074	-	789	-	hypothetical protein	-
Aco001511	turquoise	LG18	10061573	10070360	+	2357	-	Glutathione S-transferase family protein	-
Aco001449	brown	LG18	10469284	10472334	+	879	-	Metallothionein-like protein	-
Aco005546	turquoise	LG11	11176459	11177728	+	1190	-	Acidic endochitinase	-
Aco012091	brown	LG02	1446324	1448950	+	2035	-	S-adenosylmethionine decarboxylase	SAM_decarbox
Aco016393	purple	LG10	12403641	12410479	+	1472	-	Bifunctional pinoresinol-lariciresinol reductase	NmrA
Aco017273	brown	LG03	16410527	16413393	-	2070	-	hypothetical protein	-
Aco000637	purple	LG12	516559	520588	+	1785	-	NADP-binding Rossmann-fold superfamily protein	Epimerase
Aco016338	turquoise	LG03	10563746	10591078	-	2508	-	Epoxide hydrolase	Abhydrolase_1
Aco006176	purple	LG16	8238224	8247702	-	2543	-	Alcohol dehydrogenase	ADH_N
Aco002827	cyan	LG06	11915108	11918551	+	2108	-	Elongation factor 1-alpha	GTP_EFTU
Aco019014	turquoise	LG02	10894529	10899767	+	978	-	Cathepsin B-like cysteine proteinase	Peptidase_C1
Aco012772	turquoise	LG05	14661834	14670964	+	2331	-	Bifunctional pinoresinol-lariciresinol reductase	NmrA
Aco003606	lightyellow	LG17	4165610	4174225	+	3828	-	Copper amine oxidase family protein	-
Aco006995	purple	LG22	10321664	10331341	-	3126	-	4-hydroxy-3-methylbut-2-en-1-yl diphosphate synthase	-
Aco006202	turquoise	LG16	7987238	7993711	+	2079	-	Aspartic protease	Asp
Aco000051	turquoise	LG12	5187925	5192285	-	705	-	Pathogen-related protein	-
Aco010626	brown	LG07	12354472	12361679	+	2146	-	Catalase 1.11.1.6	Catalase
Aco004676	turquoise	LG05	4970176	4976407	+	1364	-	glyceraldehyde-3-phosphate dehydrogenase C2	-
Aco013111	brown	LG25	468455	473916	-	2654	-	Major facilitator superfamily protein	-
Aco011020	cyan	LG04	14359009	14365491	-	1494	-	ascorbate peroxidase	-
Aco026975	turquoise	LG05	11826437	11830247	+	1437	-	HXXXD-type acyl-transferase family protein	-
Aco004933	turquoise	LG07	891715	893790	-	1448	-	2-oxoglutarate 2OG and FeII-dependent oxygenase superfamily protein	2OG-FeII_Oxy
Aco004215	brown	LG15	643941	645176	+	655	-	Wound-induced protein WIN1	-
Aco022812	turquoise	LG03	8560686	8563390	+	960	-	O-methyltransferase family protein	-
Aco012764	brown	LG05	14585822	14590849	-	1263	-	Pectin lyase-like superfamily protein	-
Aco017493	purple	LG22	1318889	1324611	+	1591	-	O-methyltransferase 1	-
Aco008027	purple	LG21	8676569	8682922	-	1436	-	NADP-dependent oxidoreductase Zinc-binding dehydrogenase family protein	ADH_zinc_N
Aco014852	turquoise	LG14	454718	463827	-	3730	-	3-isopropylmalate dehydratase large subunit	Aconitase
Aco000800	purple	LG02	16580182	16581277	+	839	-	hypothetical protein	-
Aco004667	turquoise	LG05	4892346	4900650	-	1623	-	beta glucosidase 11	Glyco_hydro_1
Aco006590	turquoise	LG14	1138458	1146529	-	1445	-	Alcohol dehydrogenase	ADH_N
Aco024996	purple	LG14	8901105	8909153	+	1685	-	Plastid-lipid associated protein PAP / fibrillin family protein	-
Aco013290	turquoise	LG24	1381522	1401906	-	3342	-	Cytochrome P450 superfamily protein	p450
Aco028174	turquoise	LG20	7848020	7881621	+	2244	-	Terpenoid cyclases/Protein prenyltransferases superfamily protein	-
Aco009679	turquoise	LG01	465720	469885	+	1923	-	Sulfate adenylyltransferase	-
Aco015462	cyan	LG23	730789	733881	-	1883	-	70 kDa heat shock protein	HSP70
Aco013649	purple	LG13	11464147	11486039	+	5355	-	HXXXD-type acyl-transferase family protein	-
Aco019706	turquoise	LG20	8374329	8376364	-	1934	-	S-adenosylmethionine decarboxylase	SAM_decarbox
Aco011916	turquoise	LG03	13504924	13510579	+	3729	-	Major facilitator superfamily protein	-
Aco009508	brown	LG01	1677785	1684504	-	3140	-	Sucrose synthase 2.4.1.13	Glycos_transf_1
Aco007552	turquoise	LG08	262680	267416	+	3002	-	YELLOW STRIPE like 3	OPT
Aco000352	turquoise	LG12	2485966	2496708	-	2054	-	GDSL esterase/lipase	Lipase_GDSL
Aco004365	brown	LG05	2671992	2677589	+	2086	-	CTP synthase family protein	CTP_synth_N
Aco004993	brown	LG07	1280360	1283746	-	1729	-	tubulin alpha-4 chain	Tubulin_C
Aco004354	brown	LG05	2410440	2454401	-	742	-	Cathepsin L-like proteinase	-
Aco016110	turquoise	LG21	1442535	1454712	-	2198	-	Alcohol dehydrogenase	ADH_N
Aco001457	brown	LG18	10389739	10393420	-	2463	-	70 kDa heat shock protein	HSP70
Aco011968	turquoise	LG03	13990773	13992187	+	1284	-	Dehydrin family protein	-
Aco018440	turquoise	LG01	4101548	4113025	-	2182	-	L-threonine dehydratase biosynthetic IlvA	PALP
Aco005712	turquoise	LG11	12362679	12371908	-	3348	-	alpha-amylase-like 3	-
Aco011527	purple	LG06	930662	948293	-	4806	-	Clustered mitochondria protein-like protein	-
Aco006698	purple	LG01	22616544	22619584	-	1294	-	Carboxymethylenebutenolidase	-
Aco024209	turquoise	LG01	23320418	23334321	+	2620	-	Speckle-type POZ protein B	BTB
Aco009009	cyan	LG09	12773433	12774749	-	896	-	Dormancy/auxin associated family protein	-
Aco003317	purple	LG17	1948515	1952388	-	2378	-	GDP-D-glucose phosphorylase	-
Aco030435	brown	LG14	9094899	9109311	+	1707	-	Cinnamyl-alcohol dehydrogenase	ADH_N
Aco021854	purple	LG09	6713197	6718026	+	2940	-	Alkaline alpha-galactosidase alkaline alpha-galactosidase seed imbibition protein	-
Aco021762	turquoise	LG11	7779606	7784177	-	835	-	Peroxiredoxin-2C	-
Aco021826	purple	LG10	11531915	11536427	-	1762	-	fructose-bisphosphate aldolase 2	-
Aco014226	lightyellow	LG13	982628	984533	+	1022	-	Plant protein 1589 of unknown function	-
Aco011763	turquoise	LG08	11689681	11691963	+	2114	-	cytochrome P450%2C family 86%2C subfamily A%2C polypeptide 2	p450
Aco025049	purple	LG23	6547324	6551326	-	1363	-	Rubber elongation factor protein REF	-
Aco001766	turquoise	LG18	8114356	8116791	+	1353	-	Fatty acid oxidation complex subunit alpha	ECH
novel.188	brown	LG03	5850977	5852099	+	1123	-	PF03936:Terpene synthase family, metal binding domain	-
Aco006198	turquoise	LG16	8043634	8049132	-	1673	-	Mannan endo-1%2C4-beta-mannosidase	-
Aco019394	turquoise	LG06	7550967	7586557	-	4518	-	Lysine ketoglutarate reductase/saccharopine dehydrogenase	Saccharop_dh
Aco003107	cyan	LG06	13854159	13859639	-	1514	-	RNA-binding KH domain-containing protein	-
Aco005651	turquoise	LG11	11990386	11994228	-	1555	-	Inositol oxygenase	-
Aco018423	turquoise	LG01	4381016	4385255	+	1501	-	glutamine synthetase	-
Aco001453	brown	LG18	10441221	10444625	+	2033	-	ankyrin repeat family protein	-
Aco021567	turquoise	LG03	3408262	3410811	+	735	-	Pathogenesis-related thaumatin superfamily protein	Thaumatin
Aco007606	turquoise	LG08	670322	673301	-	1105	-	Protein YABBY	YABBY
Aco001634	blue	LG18	9133750	9135756	+	1608	-	expansin A8	-
Aco003511	purple	LG17	3422619	3427569	-	1424	-	glyceraldehyde-3-phosphate dehydrogenase C2	-
Aco004235	turquoise	LG15	496961	501975	+	2395	-	Sulfate adenylyltransferase	-
Aco013981	purple	LG03	737373	748898	-	4414	-	YELLOW STRIPE like 7	OPT
Aco010507	brown	LG07	13355446	13359804	+	2026	-	Terpenoid cyclases/Protein prenyltransferases superfamily protein	-
Aco008465	lightyellow	LG19	10590430	10593279	+	1624	-	Peroxidase superfamily protein	-
Aco016806	turquoise	LG04	15077402	15089389	-	6495	-	E3 ubiquitin-protein ligase UBR1	zf-UBR1
Aco015068	purple	LG01	24676902	24681238	+	1792	-	Transaldolase	-
Aco012475	brown	LG13	1406841	1412538	-	2171	-	asparagine synthetase 3	-
Aco017171	purple	LG18	645878	647815	-	1938	-	tolB protein-related	PD40
Aco008794	turquoise	LG09	2497856	2502186	-	1494	-	Cysteine synthase 2.5.1.47	PALP
Aco018996	turquoise	LG02	10688878	10700822	-	2148	-	Aldehyde dehydrogenase family 7 member B4	Aldedh
Aco006437	purple	LG14	2319115	2326653	-	3071	-	Pyrophosphate-energized proton pump	-
Aco008013	turquoise	LG21	8810677	8839290	-	7384	-	Glutathione-S-transferase 2.5.1.18	-
Aco005386	turquoise	LG11	9744850	9753825	+	4700	-	galactinol synthase 1	-
Aco016141	turquoise	LG21	1788316	1801762	+	4080	-	lipase class 3 family protein	Lipase_3
Aco003997	turquoise	LG15	2145124	2150869	+	2185	-	alanine aminotransferase 2	Aminotran_1_2
Aco014493	lightyellow	LG07	13842269	13844160	+	1451	-	J3MLI7 Thiamine thiazole synthase	-
Aco019895	brown	LG18	5661118	5699196	-	5842	-	Ferredoxin-dependent glutamate synthase	GATase_2
Aco006321	cyan	LG14	3221576	3225640	-	1145	-	Elongation factor 1-beta	-
Aco014094	turquoise	LG13	44850	50049	-	2447	-	non-specific phospholipase C1	Phosphoesterase
Aco001580	turquoise	LG18	9530003	9537309	+	2408	-	pyruvate decarboxylase-2	TPP_enzyme_N
Aco002130	turquoise	LG04	4305004	4315073	+	2813	-	H[+]-ATPase 11	E1-E2_ATPase
Aco018556	turquoise	LG06	14687395	14690903	+	1774	-	Chitinase family protein	-
Aco017378	turquoise	LG01	23887197	23895343	-	3525	-	sucrose phosphate synthase 3F	Glycos_transf_1
Aco008380	turquoise	LG19	9925449	9933996	+	2207	-	4-hydroxyphenylpyruvate dioxygenase	Glyoxalase
Aco017360	turquoise	LG01	23719732	23743922	+	2004	-	selenium-binding protein 1	-
Aco019013	turquoise	LG02	10894199	10894417	+	219	-	Thiol protease aleurain	-
Aco012472	purple	LG13	1379244	1389059	-	1687	-	Omega-3 fatty acid desaturase	-
Aco009558	purple	LG01	1342389	1346944	+	1984	-	2-dehydro-3-deoxyphosphoheptonate aldolase 3-deoxy-d-arabino-heptulosonate 7-phosphate synthase	-
Aco007096	turquoise	LG23	1592683	1598976	+	1912	-	Transmembrane amino acid transporter family protein	Aa_trans
Aco031054	turquoise	LG11	4676643	4732270	+	1562	-	Adenine nucleotide alpha hydrolases-like superfamily protein	Usp
Aco003806	turquoise	LG15	3973965	3975418	+	1200	-	Sigma factor SigB regulation protein RsbQ	-
Aco010200	cyan	LG25	2919709	2923971	-	2291	-	ATP-binding cassette transporter	ABC_tran
Aco005884	brown	LG16	10633748	10640373	-	3024	-	beta galactosidase 1	-
Aco020409	turquoise	LG07	4759798	4769471	-	2036	-	Major facilitator superfamily protein	-
Aco013659	lightyellow	LG13	11391273	11394786	+	2049	-	S-adenosylmethionine synthase 2.5.1.6	-
Aco001982	brown	LG18	6133311	6135930	-	600	-	hypothetical protein	-
Aco009829	turquoise	LG10	738574	743370	-	2067	-	inositol polyphosphate 5-phosphatase I	Exo_endo_phos
Aco014000	cyan	LG03	625394	626698	+	854	-	Bromelain inhibitor	-
Aco024987	turquoise	LG14	6567358	6588908	-	1204	-	triosephosphate isomerase	-
Aco030461	turquoise	scaffold_1010	25271	27994	-	1035	-	O-methyltransferase family protein	-
Aco015977	purple	LG22	592941	596933	+	1880	-	6-phosphogluconate dehydrogenase%2C decarboxylating 1.1.1.44	NAD_binding_2
Aco012054	brown	LG03	14672002	14681518	-	1164	-	Bifunctional inhibitor/lipid-transfer protein/seed storage 2S albumin superfamily protein	-
Aco018060	blue	LG11	8920026	8924600	+	1406	-	FASCICLIN-like arabinogalactan 6	-
Aco016140	turquoise	LG21	1776605	1781274	-	2063	-	30S ribosomal protein S7	-
Aco018451	turquoise	LG01	3960371	3968687	+	2630	-	Lipoxygenase 1.13.11	Lipoxygenase
Aco016170	brown	LG17	10918841	10926802	+	3890	-	respiratory burst oxidase protein F	Ferric_reduct
Aco014647	cyan	LG08	2901719	2903970	+	1291	-	Aquaporin-like superfamily protein	-
Aco002467	brown	LG04	1357044	1361399	-	1667	-	UDP-glucuronic acid decarboxylase 1	-
Aco009810	blue	LG10	595102	597268	-	1569	-	Leucine-rich repeat receptor-like protein kinase family protein	-
Aco021391	purple	LG17	6521197	6524689	+	941	-	hypothetical protein	-
Aco027863	blue	scaffold_553	77195	85774	+	1003	-	V-type proton ATPase subunit G	-
Aco002647	purple	LG06	10217783	10224847	+	2631	-	nitrate reductase 1	NAD_binding_1
Aco007060	turquoise	LG23	1343955	1346275	+	702	-	PEBP phosphatidylethanolamine-binding protein family protein	-
Aco005563	purple	LG11	11283073	11284548	+	1476	-	UDP-Glycosyltransferase superfamily protein	UDPGT
Aco008411	purple	LG19	10176184	10184549	-	5561	-	Alpha-glucosidase	Glyco_hydro_31
Aco005342	brown	LG11	9248662	9250987	-	1212	-	Transcription factor bHLH144	-
Aco000426	turquoise	LG12	1923294	1928041	+	2368	-	Transmembrane 9 superfamily member	-
Aco010251	brown	LG25	2549607	2553034	+	1832	-	Aquaporin-like superfamily protein	-
Aco008511	brown	LG09	405037	413212	-	3557	-	Phosphorylase 2.4.1.1	-
Aco001824	turquoise	LG18	7642937	7645002	+	859	-	Major pollen allergen Bet v 1-D/H	-
Aco012373	brown	LG01	2558651	2562170	+	2065	-	Divalent metal cation transporter MntH	-
Aco005296	turquoise	LG16	3676161	3678986	-	994	-	thioredoxin 2	-
Aco014164	purple	LG13	560464	575429	+	6060	-	Protein kinase superfamily protein	Pkinase
Aco004241	turquoise	LG15	445602	447621	+	965	-	1%2C2-dihydroxy-3-keto-5-methylthiopentene dioxygenase 1.13.11.54 Acireductone dioxygenase Fe2+-requiring	-
Aco004224	turquoise	LG15	576590	581328	-	1793	-	ADP-L-glycero-D-manno-heptose-6-epimerase	Epimerase
Aco020601	turquoise	LG23	5239241	5244557	-	991	-	Adenine nucleotide alpha hydrolases-like superfamily protein	Usp
Aco010729	turquoise	LG10	3115039	3120246	+	3947	-	BAG family molecular chaperone regulator	-
Aco012014	cyan	LG03	14343296	14346018	-	1449	-	Aquaporin-like superfamily protein	-
Aco013943	cyan	LG03	1101076	1105276	+	2225	-	Phenylalanine ammonia-lyase 4.3.1.24	-
Aco003000	darkred	LG06	13156432	13162270	+	4112	-	Protein NRT1/ PTR FAMILY 3.1	-
Aco012184	brown	LG02	557383	563834	+	3624	-	Dormancy/auxin associated family protein	-
Aco018977	brown	LG12	10006716	10014168	+	1871	-	Sec14p-like phosphatidylinositol transfer family protein	CRAL_TRIO_N
Aco024340	turquoise	LG01	15513459	15517048	+	1181	-	ferredoxin 3	Fer2
Aco010937	brown	LG04	14952008	14952786	-	474	-	hypothetical protein	-
Aco023030	purple	LG20	2841031	2847572	-	2023	-	Beta-fructofuranosidase%2C insoluble isoenzyme	-
Aco002533	brown	LG04	869832	874650	+	2052	-	2-succinylbenzoate-CoA ligase	AMP-binding
Aco004069	purple	LG15	1616913	1621351	+	2002	-	2-dehydro-3-deoxyphosphoheptonate aldolase 3-deoxy-d-arabino-heptulosonate 7-phosphate synthase	-
Aco005038	purple	LG07	1611401	1612120	+	720	-	thaumatin-like protein	Thaumatin
Aco005788	brown	LG11	12892522	12895981	-	1718	-	DCD Development and Cell Death domain protein	-
Aco012365	purple	LG01	2618150	2619352	-	1203	-	Progesterone 5-beta-reductase 1.1.1.145	-
Aco021174	brown	LG14	10409468	10411656	-	1794	-	FASCICLIN-like arabinogalactan 2	-
Aco008661	purple	LG09	1395894	1399254	+	998	-	actin depolymerizing factor 6	Cofilin_ADF
Aco030337	cyan	scaffold_2563	7254	9577	-	1736	-	beta-amylase 3	-
Aco010785	turquoise	LG10	3792955	3803633	+	2730	-	Fatty acid oxidation complex subunit alpha	3HCDH_N
Aco006741	turquoise	LG01	22278063	22283564	-	1676	-	Aspartate aminotransferase 2.6.1.1	Aminotran_1_2
novel.261	turquoise	LG04	6838712	6840978	+	2267	-	PF00385:Chromo (CHRromatin Organisation MOdifier) domain|PF12609:Wound-induced protein	Chromo
Aco012157	brown	LG02	737778	741580	-	2625	-	Ethylene-responsive transcription factor	AP2
Aco018515	brown	LG06	14351186	14368415	+	4757	-	Zeaxanthin epoxidase	FAD_binding_3
Aco011047	brown	LG04	14156072	14170374	-	3422	-	1-phosphatidylinositol-4%2C5-bisphosphate phosphodiesterase Phosphoinositide-specific phospholipase c 3.1.4.11	PI-PLC-X
Aco008298	turquoise	LG19	9248378	9254136	+	1260	-	NADP-linked oxidoreductase superfamily protein	Aldo_ket_red
Aco009564	darkred	LG01	1293472	1302588	+	3594	-	Calmodulin-binding transcription activator	CG-1
Aco001406	purple	LG18	10787420	10792165	+	2877	-	proline transporter 1	Aa_trans
Aco018139	turquoise	LG12	10967285	10989439	-	2997	-	Methylthioribose kinase	APH
Aco002897	cyan	LG06	12375895	12378426	-	1716	-	glycine-rich protein	-
Aco007608	cyan	LG08	684133	690979	-	2326	-	U1 small nuclear ribonucleoprotein 70 kDa	RRM_1
Aco010373	blue	LG03	1634807	1641623	+	2114	-	E3 ubiquitin-protein ligase PRT1	ZZ
Aco013293	turquoise	LG24	1430066	1435355	+	1415	-	Aquaporin-like superfamily protein	-
Aco021180	purple	LG14	10484896	10494167	+	2663	-	Protein kinase superfamily protein	ABC1
Aco011631	turquoise	LG06	12782	15744	-	1224	-	Cation transport regulator-like protein	ChaC
Aco018929	brown	LG20	7817020	7818657	+	899	-	Terpenoid cyclases/Protein prenyltransferases superfamily protein	-
Aco024110	purple	LG06	3976654	3986386	+	2940	-	H[+]-ATPase 2	E1-E2_ATPase
Aco017338	cyan	LG01	23611475	23613836	-	2279	-	Protein of unknown function%2C DUF538	-
Aco013128	cyan	LG25	309040	310678	+	1444	-	1-phosphatidylinositol phosphodiesterase	-
Aco007597	purple	LG08	606727	608775	-	1012	-	Heavy metal transport/detoxification superfamily protein	-
Aco011680	turquoise	LG08	12282375	12287201	+	309	-	uncharacterized protein	-
Aco017899	purple	LG04	12437455	12439625	-	1994	-	S-adenosyl-L-methionine-dependent methyltransferases superfamily protein	Methyltransf_11
Aco017520	purple	LG22	1621827	1629560	+	2652	-	ATP-dependent zinc metalloprotease FtsH	AAA
Aco006460	turquoise	LG14	2152762	2158146	+	1808	-	Serine carboxypeptidase S28 family protein	Peptidase_S28
Aco022698	turquoise	LG01	9863846	9867198	-	1679	-	Protein of unknown function DUF760	-
Aco008631	turquoise	LG09	1221533	1224718	+	1233	-	Inorganic pyrophosphatase	Pyrophosphatase
Aco003790	turquoise	LG15	4093146	4096845	-	618	-	hypothetical protein	-
Aco007607	purple	LG08	680264	684325	+	1137	-	Thylakoid lumenal protein	Pentapeptide
Aco018422	purple	LG01	4389227	4405661	-	2337	-	phosphoglucomutase	PGM_PMM_III
Aco004805	purple	LG05	5977848	5984216	+	3494	-	Leucine-rich receptor-like protein kinase family protein	Pkinase
Aco009579	lightyellow	LG01	1177424	1181984	+	1883	-	Inositol-3-phosphate synthase	-
Aco001928	darkred	LG18	6761623	6766684	-	963	-	Ribosomal protein	-
Aco014727	purple	LG20	9525640	9529277	+	1366	-	annexin 1	-
Aco008726	turquoise	LG09	1862541	1873067	+	2290	-	Peroxisomal membrane protein	FMN_dh
Aco005578	turquoise	LG11	11399636	11400607	+	658	-	hypothetical protein	-
Aco016028	turquoise	LG22	95470	100354	-	2568	-	Uncharacterised protein family UPF0114	-
novel.110	turquoise	LG02	2061182	2064121	+	1461	-	-	-
Aco000863	purple	LG02	16114529	16116600	+	1146	-	BTB/POZ domain-containing protein	BTB
Aco013087	turquoise	LG25	713755	718243	-	2018	-	Eukaryotic aspartyl protease family protein	-
Aco006268	turquoise	LG14	3753864	3758081	+	2925	-	Alpha-glucosidase	Glyco_hydro_31
Aco012680	purple	LG05	13619126	13621850	+	2288	-	Glycosyltransferase family 61 protein	-
novel.32	brown	LG01	11548825	11551672	+	2848	-	PF00400:WD domain, G-beta repeat	WD40
Aco009949	brown	LG10	1675821	1681444	-	2211	-	phosphofructokinase 3	PFK
Aco002173	purple	LG04	3718904	3729754	+	3489	-	Protein kinase family protein	Pkinase
Aco007145	blue	LG23	1971977	1979952	-	2088	-	Auxin efflux carrier family protein	-
Aco017026	darkred	LG08	13690679	13696245	+	3799	-	S-adenosyl-L-methionine-dependent methyltransferases superfamily protein	-
Aco010310	purple	LG25	2149317	2154052	-	2234	-	Pyruvate kinase 2.7.1.40	PK
Aco011007	turquoise	LG04	14479305	14482621	-	1161	-	uncharacterized protein	-
Aco003551	turquoise	LG17	3696234	3698866	+	717	-	Heavy metal transport/detoxification superfamily protein	-
Aco012539	lightyellow	LG13	1945136	1950474	-	3158	-	Protein kinase superfamily protein	Pkinase
Aco002770	cyan	LG06	11469923	11473726	-	1948	-	general regulatory factor 2	-
Aco000731	cyan	LG02	17117038	17130654	+	3843	-	Phosphofructokinase family protein	PFK
Aco013064	lightyellow	LG25	1006574	1008150	+	1354	-	Chitinase family protein	-
Aco018754	purple	LG11	2072194	2095514	+	1979	-	Mediator of RNA polymerase II transcription subunit	-
Aco012399	darkred	LG01	2344698	2346140	+	1443	-	UDP-glucose 6-dehydrogenase family protein	-
Aco000916	turquoise	LG02	15694430	15695719	-	1290	-	RING/U-box superfamily protein	-
Aco019975	turquoise	LG08	4368502	4380174	-	2030	-	2-succinylbenzoate-CoA ligase	AMP-binding
Aco029176	turquoise	LG01	17848442	17853380	+	1232	-	NADP-binding Rossmann-fold superfamily protein	adh_short
Aco000686	brown	LG12	182348	187945	-	2994	-	Boron transporter	-
Aco007469	turquoise	LG12	11938753	11947173	-	1684	-	glyceraldehyde-3-phosphate dehydrogenase C2	-
Aco014849	cyan	LG14	484531	490205	+	1303	-	synaptotagmin A	-
Aco011098	purple	LG04	13742974	13746406	-	1692	-	Mitochondrial substrate carrier family protein	Mito_carr
Aco013139	turquoise	LG25	145179	147735	-	1588	-	Protein STAY-GREEN	-
Aco006006	turquoise	LG16	9757807	9759513	-	523	-	metallothionein 3	-
Aco019311	purple	LG03	9915194	9922709	+	1670	-	Enolase 4.2.1.11	-
Aco002628	brown	LG06	9844078	9848486	-	2021	-	glutamate decarboxylase	-
Aco002721	cyan	LG06	10990800	10996084	+	1834	-	RNA-binding RRM/RBD/RNP motifs family protein	RRM_1
Aco014347	purple	LG05	644995	656425	-	4171	-	GIGANTEA-like protein	-
Aco011549	cyan	LG06	706706	709802	-	2995	-	Transmembrane 9 superfamily member	-
Aco014006	purple	LG03	585477	598310	+	5416	-	uncharacterized protein	-
Aco002754	cyan	LG06	11312280	11316515	-	1577	-	2-oxoglutarate 2OG and FeII-dependent oxygenase superfamily protein	2OG-FeII_Oxy
Aco004074	brown	LG15	1587131	1592037	+	3121	-	Leucine-rich repeat-containing protein	-
Aco022956	purple	LG08	3155876	3159800	-	2040	-	Pheophorbide a oxygenase family protein with Rieske domain	-
Aco004901	turquoise	LG07	675327	677711	-	2385	-	subtilisin-like serine protease 2	Peptidase_S8
Aco011327	brown	LG01	12366925	12372152	+	3013	-	S-adenosyl-L-methionine-dependent methyltransferases superfamily protein	-
Aco012627	turquoise	LG13	2934870	2951149	-	2047	-	MATE efflux family protein	MatE
Aco016764	brown	LG17	695983	708552	-	1781	-	Late embryogenesis abundant LEA hydroxyproline-rich glycoprotein family	-
Aco018902	turquoise	LG20	7338965	7340683	-	1201	-	caffeoyl-CoA 3-O-methyltransferase	-
Aco017433	darkred	LG09	3548087	3555801	-	3533	-	Argonaute family protein	Piwi
Aco007079	turquoise	LG23	1487255	1490126	-	1177	-	ferritin 4	Ferritin
Aco014187	turquoise	LG13	697043	698509	-	969	-	Type 2 metallothionein-like protein	-
Aco009176	brown	LG22	8181354	8186519	-	2680	-	ATP-dependent zinc metalloprotease FtsH	AAA
Aco003912	cyan	LG15	2852643	2856253	-	1863	-	COBRA-like protein	-
Aco007577	purple	LG08	477281	480620	+	2109	-	Cytochrome P450 superfamily protein	p450
Aco003572	turquoise	LG17	3886097	3889136	-	1066	-	Cytochrome b5	-
Aco003539	turquoise	LG17	3603649	3607708	-	1288	-	Cystinosin-like protein	-
Aco021646	cyan	LG06	3277357	3281208	+	1630	-	Peroxidase superfamily protein	-
Aco013330	turquoise	LG15	11196043	11200728	-	1982	-	4-hydroxy-3-methylbut-2-enyl diphosphate reductase	-
Aco011952	purple	LG03	13826114	13830928	-	2520	-	Catalase 1.11.1.6	Catalase
Aco014864	purple	LG14	377785	381881	-	1870	-	glucose 6-phosphate/phosphate translocator 1	-
Aco005160	cyan	LG07	2592382	2598990	-	3045	-	5-methyltetrahydropteroyltriglutamate-homocysteine methyltransferase	-
Aco007617	brown	LG08	762619	766200	+	1264	-	Remorin family protein	-
Aco014593	cyan	LG08	2204378	2216896	+	2300	-	Pre-mRNA-processing factor-like protein	-
Aco027155	turquoise	LG05	10346792	10352742	-	1732	-	Pyrimidine-specific ribonucleoside hydrolase RihA	-
Aco026570	purple	scaffold_946	24764	26530	+	1121	-	Glycosyl hydrolase superfamily protein	-
Aco011205	turquoise	LG01	13476157	13482009	+	2843	-	Plant protein of unknown function DUF869	-
Aco013679	purple	LG13	11279145	11282211	+	734	-	Stress responsive A/B Barrel Domain	-
Aco001270	turquoise	LG02	12819665	12822308	+	795	-	Peptidyl-prolyl cis-trans isomerase	-
Aco002736	purple	LG06	11110190	11111176	+	987	-	Mitochondrial carrier protein	Mito_carr
Aco015555	purple	LG03	12369255	12381029	+	3028	-	SPX domain-containing membrane protein	MFS_1
Aco001527	darkred	LG18	9906314	9909198	+	1615	-	mitogen-activated protein kinase 3	Pkinase
Aco015465	brown	LG23	755678	762148	+	3459	-	FYD-like protein	HSP70
Aco012374	brown	LG01	2544244	2546804	+	2331	-	Auxin-responsive GH3 family protein	-
Aco015367	brown	LG23	59123	64877	+	2579	-	Vacuolar cation/proton exchanger 1a	Na_Ca_ex
Aco024619	turquoise	scaffold_690	22302	27299	+	1954	-	citrate synthase 2	Citrate_synt
Aco004855	turquoise	LG07	344939	348868	+	1536	-	Glycerophosphoryl diester phosphodiesterase	-
Aco013718	turquoise	LG13	10918442	10921309	-	1192	-	Transmembrane protein	-
Aco016004	turquoise	LG22	338852	341865	+	1530	-	hypothetical protein	-
Aco002820	brown	LG06	11833859	11835010	-	504	-	Lipase/lipooxygenase%2C PLAT/LH2 family protein	-
Aco004360	brown	LG05	2590958	2616400	-	4625	-	Cathepsin B-like cysteine proteinase	Peptidase_C1
Aco005402	lightyellow	LG11	9906784	9914071	+	1166	-	Carbonic anhydrase 4.2.1.1	-
Aco012186	cyan	LG02	524042	540137	+	3674	-	calcium-transporting ATPase	Cation_ATPase_C
Aco007246	turquoise	LG23	2686208	2689502	-	2022	-	Hydrolase%2C alpha/beta fold family protein	-
Aco018578	purple	LG01	21114139	21120381	-	1713	-	IAA-amino acid hydrolase ILR1-like protein	Peptidase_M20
Aco016318	turquoise	LG03	10786050	10791434	-	1104	-	Thioredoxin superfamily protein	-
Aco006060	darkred	LG16	9301838	9304395	-	1137	-	allene oxide cyclase 4	-
Aco017444	purple	LG09	3768887	3774658	+	2586	-	1-deoxy-D-xylulose 5-phosphate synthase 1	-
Aco000052	turquoise	LG12	5176510	5177988	+	1479	-	Allene oxide synthase 4.2.1.92	p450
Aco003040	purple	LG06	13420494	13425210	+	2395	-	enolase 1	-
Aco005583	turquoise	LG11	11431281	11434822	+	849	-	Pathogen-related protein	-
Aco019537	blue	LG07	11454888	11455406	+	519	-	Peptidyl-prolyl cis-trans isomerase	Pro_isomerase
Aco003013	turquoise	LG06	13226213	13227659	-	983	-	PLANT CADMIUM RESISTANCE 2	-
Aco002384	turquoise	LG04	1954527	1955771	+	1117	-	beta-1%2C3-glucanase 1	Glyco_hydro_17
Aco007086	darkred	LG23	1528606	1530513	-	1908	-	exocyst subunit exo70 family protein B1	Exo70
Aco025854	darkred	LG02	3565920	3568148	+	2229	-	arginine decarboxylase 2	-
Aco006475	blue	LG14	2023746	2026705	-	1287	-	uncharacterized protein	-
Aco008437	turquoise	LG19	10360575	10364618	+	1205	-	Autophagy-related protein	-
Aco012234	brown	LG02	124540	133864	-	4003	-	Auxin response factor	Auxin_resp
Aco016590	lightyellow	LG08	10167872	10168824	+	840	-	histone H1-3	-
Aco023603	brown	LG09	5029301	5034617	+	2012	-	tubulin alpha-4 chain	Tubulin
Aco023269	cyan	LG02	11242029	11246810	-	1095	-	oxophytodienoate-reductase 3	Oxidored_FMN
Aco014884	turquoise	LG14	285357	289059	+	1382	-	Aldolase-type TIM barrel family protein	ComA
Aco009577	turquoise	LG01	1190656	1194769	-	2586	-	Acyl-coenzyme A oxidase	-
Aco018391	turquoise	LG07	12079797	12083685	+	753	-	DNA-directed RNA polymerase II subunit RPB4	RNA_pol_Rpb4
Aco022750	purple	LG02	5421050	5428404	+	2232	-	H[+]-ATPase 2	E1-E2_ATPase
Aco004994	purple	LG07	1286373	1299321	-	5721	-	Leucine-rich receptor-like protein kinase family protein	Pkinase
Aco004255	brown	LG15	348726	352481	-	1265	-	homocysteine methyltransferase 2	-
Aco010797	brown	LG10	3979491	3983551	+	1366	-	Auxin-responsive protein	-
Aco022842	turquoise	LG03	1393875	1406980	+	2782	-	beta glucosidase 46	Glyco_hydro_1
Aco020895	purple	LG15	5603569	5615510	+	1372	-	carotenoid cleavage dioxygenase 1	RPE65
Aco002761	darkred	LG06	11383837	11385466	+	1541	-	Homeobox-leucine zipper protein family	Homeobox
Aco003442	purple	LG17	2887161	2892438	+	1695	-	Cysteine synthase 2.5.1.47	PALP
Aco031406	brown	scaffold_2973	3	900	-	562	-	plasma-membrane associated cation-binding protein 1	-
Aco002791	brown	LG06	11585971	11592642	-	3494	-	UDP-Glycosyltransferase superfamily protein	UDPGT
Aco002461	turquoise	LG04	1419541	1426300	+	2054	-	beta glucosidase 11	Glyco_hydro_1
novel.793	brown	LG13	1618625	1622045	+	1506	-	PF01187:Macrophage migration inhibitory factor (MIF)	MIF
Aco000255	purple	LG12	3317957	3322288	+	1479	-	purple acid phosphatase 3	Metallophos
Aco010861	brown	LG12	5726628	5760025	+	3144	-	Phosphatidylinositol 3-kinase	-
Aco002692	turquoise	LG06	10717970	10723337	+	2285	-	Sulfite reductase NADPH hemoprotein beta-component	-
Aco000687	cyan	LG12	174450	180260	+	1905	-	Protein kinase superfamily protein	Pkinase
Aco017487	brown	LG22	1232176	1241075	+	1801	-	Phosphoglycolate phosphatase	-
Aco009152	turquoise	LG09	13659897	13661735	-	1371	-	NAC domain containing protein 19	NAM
Aco019806	blue	LG07	4185012	4194450	+	3287	-	ATP-dependent zinc metalloprotease FTSH	AAA
Aco000792	brown	LG02	16635043	16640267	-	2053	-	ADP%2CATP carrier protein	Mito_carr
Aco014271	turquoise	LG05	147024	150871	+	1556	-	heme oxygenase 3	-
Aco006889	purple	LG22	9551084	9555436	+	1357	-	Cysteine proteinases superfamily protein	OTU
Aco009667	purple	LG01	545865	549879	+	1754	-	Magnesium transporter MRS2-I	-
Aco025304	brown	LG05	14955663	14961208	-	1882	-	Succinyl-CoA ligase ADP-forming subunit beta	-
Aco015695	lightyellow	LG19	288230	292701	+	1167	-	NADP-binding Rossmann-fold superfamily protein	Epimerase
Aco007788	purple	LG21	10425590	10427177	-	830	-	Zinc finger A20 and AN1 domain-containing stress-associated protein	zf-A20
Aco004638	brown	LG05	4659344	4666006	-	2333	-	Esterase/lipase/thioesterase family protein	Abhydrolase_1
Aco005581	purple	LG11	11416220	11419050	-	1157	-	delta3%2C delta2-enoyl CoA isomerase 1	ECH
Aco003031	brown	LG06	13379694	13385178	+	2482	-	Aldehyde dehydrogenase family 2 member C4	Aldedh
Aco023285	purple	LG04	12811608	12813231	+	1398	-	NAC domain containing protein 102	NAM
Aco013624	cyan	LG13	11683114	11685447	+	934	-	hypothetical protein	-
Aco023288	turquoise	LG04	12754921	12757044	-	1341	-	NAC domain containing protein 47	NAM
Aco001460	purple	LG18	10374517	10375938	+	1422	-	70 kDa heat shock protein	HSP70
Aco011476	purple	LG06	1566272	1568558	-	2204	-	Galactosylgalactosylxylosylprotein 3-beta-glucuronosyltransferase	-
Aco007725	purple	LG08	1517243	1517464	+	222	-	ubiquitin-like protein 5	-
Aco012909	purple	LG03	15692254	15697617	+	2634	-	Two-component response regulator-like protein	Myb_DNA-binding
Aco008358	purple	LG19	9783824	9786871	+	1139	-	Dehydrogenase/reductase SDR family member	adh_short
Aco013990	purple	LG03	693090	698635	-	1766	-	LL-diaminopimelate aminotransferase	Aminotran_1_2
Aco009636	brown	LG01	779024	783551	-	2813	-	Endoglucanase	-
Aco005292	turquoise	LG07	3767129	3774820	-	2432	-	Protein NRT1/ PTR FAMILY 2.13	-
Aco016935	purple	LG02	1958535	1964604	+	1390	-	cinnamoyl coa reductase 1	Epimerase
Aco004333	turquoise	LG05	2260516	2261001	+	486	-	Protein of unknown function%2C DUF538	-
Aco005721	blue	LG11	12440786	12441882	-	195	-	hypothetical protein	-
Aco018239	turquoise	LG01	14191437	14195031	-	1322	-	Fructose-1%2C6-bisphosphatase class	-
Aco007908	turquoise	LG21	9628519	9632954	+	1624	-	Peroxidase superfamily protein	-
Aco008897	turquoise	LG09	11952363	11958003	+	2032	-	hypothetical protein	-
Aco019810	cyan	LG07	4152114	4161032	-	714	-	Proofreading thioesterase EntH	4HBT
Aco011685	turquoise	LG08	12260022	12267730	+	1912	-	Alcohol dehydrogenase	ADH_zinc_N
Aco011033	turquoise	LG04	14231624	14239940	+	3686	-	Crotonobetainyl-CoA dehydrogenase	Pkinase_Tyr
Aco019379	turquoise	LG05	6560360	6562561	-	1437	-	NAC domain containing protein 32	NAM
Aco005847	turquoise	LG16	10934798	10934995	-	198	-	hypothetical protein	-
novel.153	turquoise	LG02	1901894	1906783	-	908	-	PF00240:Ubiquitin family	ubiquitin
Aco002244	blue	LG04	2982068	2982839	-	604	-	RNA-binding protein 1	RRM_1
Aco011407	turquoise	LG01	11813716	11816628	-	1176	-	nicotinamidase 1	Isochorismatase
Aco011903	brown	LG03	13423879	13427130	-	2328	-	Homeodomain-like superfamily protein	Myb_DNA-binding
Aco015517	turquoise	LG03	12717867	12722309	-	1296	-	1-aminocyclopropane-1-carboxylate synthase 11	Aminotran_1_2
Aco014380	blue	LG05	865904	876512	+	3164	-	aminopeptidase M1	-
Aco011886	brown	LG03	13296730	13306583	+	3868	-	auxin response factor 8	Auxin_resp
Aco007053	turquoise	LG23	1307836	1310584	-	1830	-	ABC transporter	-
Aco013101	turquoise	LG25	594448	598999	-	1784	-	Dehydroquinate synthase 1.1.1.24	-
Aco003926	turquoise	LG15	2762618	2762911	-	294	-	hypothetical protein	-
Aco011000	darkred	LG04	14522127	14523891	-	1374	-	hypothetical protein	-
Aco000548	brown	LG12	1134030	1142063	+	3064	-	TBC1 domain family member	TBC
Aco007996	turquoise	LG21	8955143	8959668	+	2506	-	12-oxophytodienoate reductase 2	Oxidored_FMN
Aco009748	purple	LG10	103891	107906	+	1687	-	Lactoylglutathione lyase / glyoxalase I family protein	-
Aco019651	turquoise	LG13	7970629	7991076	+	1686	-	hypothetical protein	-
Aco008840	purple	LG09	11384594	11389997	+	2019	-	Protein disulfide isomerase-like 1-4	-
Aco005427	turquoise	LG11	10132303	10137733	+	3534	-	Hydroxyproline-rich glycoprotein family protein	-
Aco003530	turquoise	LG17	3545725	3548794	-	1724	-	Cytochrome P450 superfamily protein	p450
Aco007099	cyan	LG23	1628796	1634806	-	2464	-	Acetylornithine aminotransferase	Aminotran_3
novel.399	blue	LG06	754548	756964	+	2283	-	PF13639:Ring finger domain	-
Aco000509	turquoise	LG12	1374696	1377612	-	1326	-	NADP-binding Rossmann-fold superfamily protein	-
Aco008704	brown	LG09	1708396	1723662	+	5687	-	Leucine-rich repeat-containing protein	-
Aco003399	turquoise	LG17	2610916	2615271	-	1269	-	22.0 kDa class IV heat shock protein	-
Aco005826	purple	LG16	11097939	11099449	+	1122	-	Late embryogenesis abundant protein	-
Aco018909	darkred	LG20	7453792	7464860	-	1715	-	O-fucosyltransferase family protein	-
Aco014221	purple	LG13	908675	913742	+	1569	-	Metal tolerance protein	-
Aco012411	turquoise	LG01	2236319	2239448	+	1316	-	RNA-binding protein 1	RRM_1
Aco003358	cyan	LG17	2329182	2336566	+	2729	-	Auxin response factor	-
Aco016615	turquoise	LG08	10409573	10412072	-	2451	-	Protein kinase superfamily protein	Pkinase_Tyr
Aco000337	turquoise	LG12	2609005	2615949	+	2161	-	NADP-binding Rossmann-fold superfamily protein	adh_short
Aco026066	purple	LG13	9549826	9554717	+	905	-	Acyl carrier protein	PP-binding
Aco009585	brown	LG01	1097316	1102110	+	3574	-	Leucine-rich receptor-like protein kinase family protein	Pkinase
Aco010674	cyan	LG10	2576591	2584286	-	1974	-	GDSL esterase/lipase	Lipase_GDSL
Aco000269	turquoise	LG12	3210665	3218050	-	2139	-	sucrose transporter 4	MFS_1
Aco023175	brown	LG11	6576645	6583765	+	1820	-	CCT motif family protein	CCT
Aco015001	turquoise	LG04	11634632	11641972	+	2050	-	zinc induced facilitator-like 2	MFS_1
Aco012233	turquoise	LG02	146650	162920	-	3336	-	Galactokinase	GHMP_kinases
Aco016348	brown	LG03	10426806	10431396	+	1295	-	Protein of unknown function DUF1218	-
Aco009239	lightyellow	LG22	8671077	8678488	+	2663	-	Mitochondrial intermediate peptidase	Peptidase_M3
Aco005165	brown	LG07	2626724	2631626	+	3126	-	protein kinase family protein	-
Aco012277	turquoise	LG01	3499385	3502371	+	1764	-	Auxin-responsive family protein	Cytochrom_B561
Aco002609	turquoise	LG06	9610228	9615860	+	1899	-	BREVIS RADIX-like 4	-
Aco000780	brown	LG02	16735547	16743022	-	2913	-	LOCATED IN: chloroplast	-
Aco014140	purple	LG13	365959	369154	-	1200	-	hypothetical protein	-
Aco012905	turquoise	LG03	15650614	15652477	-	1518	-	purine permease 11	-
Aco001526	purple	LG18	9909520	9912699	-	1691	-	ascorbate peroxidase	-
Aco006733	turquoise	LG01	22361515	22366195	+	1617	-	alpha/beta-Hydrolases superfamily protein	-
Aco016435	cyan	LG10	11799859	11807562	-	2310	-	mitogen-activated protein kinase 16	Pkinase
Aco014650	turquoise	LG20	10023489	10027268	-	1189	-	Annexin	-
Aco018336	brown	LG16	2141641	2151775	+	2166	-	Phosphoethanolamine N-methyltransferase	Methyltransf_11
Aco015003	brown	LG04	11655226	11657633	+	1105	-	calmodulin 7	-
Aco005035	turquoise	LG07	1582889	1585129	-	1110	-	uncharacterized protein	-
Aco018061	darkred	LG11	8908818	8915812	+	3088	-	auxin response factor 4	Auxin_resp
Aco003226	purple	LG17	1209248	1212242	-	1525	-	fructose-bisphosphate aldolase 2	-
Aco025302	purple	LG05	14936808	14946079	+	1381	-	Glutaredoxin family protein	-
Aco009525	turquoise	LG01	1566598	1570116	-	952	-	calmodulin 4	-
Aco014133	brown	LG13	303436	308540	-	2198	-	Protein kinase superfamily protein	Pkinase_Tyr
Aco005006	cyan	LG07	1359560	1362521	+	2177	-	Glucan endo-1%2C3-beta-glucosidase	Glyco_hydro_17
Aco023538	purple	LG07	5678195	5688451	-	2580	-	zeta-carotene desaturase	Amino_oxidase
Aco006487	brown	LG14	1920876	1923417	-	1795	-	Eukaryotic aspartyl protease family protein	-
Aco015696	turquoise	LG19	236953	284106	+	3698	-	NADP-binding Rossmann-fold superfamily protein	Epimerase
Aco014222	turquoise	LG13	917374	926668	+	2882	-	sulfate transporter 4.1	Sulfate_transp
Aco031680	turquoise	scaffold_1298	7569	9993	-	831	-	Late embryogenesis abundant LEA hydroxyproline-rich glycoprotein family	-
Aco031505	turquoise	scaffold_2201	6959	10385	-	1966	-	Glycosyltransferase family 61 protein	-
Aco015176	turquoise	LG05	1555752	1560346	-	2109	-	amino acid permease 1	Aa_trans
novel.1258	cyan	LG22	9597655	9602505	-	2825	-	PF02359:Cell division protein 48 (CDC48), N-terminal domain|PF00004:ATPase family associated with various cellular activities (AAA)|PF02933:Cell division protein 48 (CDC48), domain 2	AAA
Aco017179	turquoise	LG18	557972	563980	-	1712	-	pyruvate dehydrogenase kinase	HATPase_c
Aco011911	darkred	LG03	13480414	13486734	+	2814	-	Calcium-dependent protein kinase family protein	Pkinase
novel.266	turquoise	LG04	10326345	10331903	+	1567	-	PF13415:Galactose oxidase, central domain|PF01344:Kelch motif	Kelch_1
Aco008759	turquoise	LG09	2168679	2169671	-	993	-	alpha/beta-Hydrolases superfamily protein	Abhydrolase_3
Aco000737	brown	LG02	17072755	17076445	-	1672	-	AT hook motif DNA-binding family protein	-
Aco017770	cyan	LG21	74767	76461	+	1065	-	hypothetical protein	-
Aco012070	blue	LG02	1669210	1669812	-	435	-	RNA-binding protein 1	RRM_1
Aco002955	purple	LG06	12816579	12820947	+	1965	-	Dihydroorotate dehydrogenase B NAD[+]%2C catalytic subunit	DHO_dh
Aco002816	cyan	LG06	11801998	11803110	-	1036	-	Lipase/lipooxygenase%2C PLAT/LH2 family protein	-
Aco004193	brown	LG15	775995	782579	-	3530	-	Beta-galactosidase 3.2.1.23	-
Aco011428	turquoise	LG06	2298205	2301252	-	1362	-	Cytochrome P450 superfamily protein	p450
Aco012566	brown	LG13	2227495	2247705	-	3887	-	Phototropic-responsive NPH3 family protein	BTB
Aco005482	turquoise	LG11	10577841	10582233	-	1665	-	TRICHOME BIREFRINGENCE-LIKE 38	-
Aco005691	cyan	LG11	12239293	12249642	-	2885	-	Alliin lyase	-
Aco009338	turquoise	LG22	7870162	7873663	-	1109	-	Thioredoxin superfamily protein	-
Aco000525	darkred	LG12	1279571	1283408	+	2483	-	70 kDa heat shock protein	HSP70
Aco009814	brown	LG10	634903	637721	-	1673	-	Protein of unknown function DUF581	-
Aco014261	darkred	LG05	60783	64955	-	3468	-	F-box family protein	-
Aco013117	brown	LG25	385615	385943	+	250	-	uncharacterized protein	-
Aco022498	brown	LG12	7146895	7159902	-	4640	-	Activating signal cointegrator 1 complex subunit	-
Aco017009	turquoise	LG08	13580637	13588673	+	3686	-	Protein NRT1/ PTR FAMILY 8.3	-
Aco006593	brown	LG14	1122581	1124690	-	1781	-	Pectin lyase-like superfamily protein	-
Aco011715	brown	LG08	12039992	12041776	-	1248	-	expansin B2	-
Aco014105	blue	LG13	134939	137984	-	2433	-	Tetratricopeptide repeat TPR-like superfamily protein	-
Aco010761	turquoise	LG10	3546478	3551642	-	1908	-	Protein kinase superfamily protein	Pkinase_Tyr
Aco014066	turquoise	LG03	170479	174407	+	1409	-	Agmatinase	-
Aco019209	turquoise	LG13	10217142	10219997	+	1014	-	Hypoxia-responsive family protein	-
Aco005776	turquoise	LG11	12827860	12835089	-	2094	-	Vacuolar processing enzyme 1b	-
Aco023383	turquoise	LG20	4549212	4556227	+	1383	-	Protein phosphatase 2C family protein	PP2C
Aco012992	darkred	LG25	1555264	1561125	-	2518	-	L-amino-acid oxidase	Amino_oxidase
Aco005525	cyan	LG11	10949987	10972398	-	3388	-	TRICHOME BIREFRINGENCE-LIKE 26	-
Aco018591	brown	LG01	20981759	20988195	-	2342	-	Copine family protein	-
Aco000778	purple	LG02	16753229	16757632	-	2092	-	Pectin lyase-like superfamily protein	-
Aco013908	turquoise	LG08	9782269	9802271	+	3356	-	Hydroxymethylglutaryl-CoA synthase	-
Aco014113	darkred	LG13	206687	209165	-	2074	-	myb-like transcription factor family protein	Myb_DNA-binding
Aco029872	cyan	scaffold_1023	39321	45750	+	4741	-	hypothetical protein	NB-ARC
Aco015073	brown	LG01	24620614	24627447	-	3837	-	auxin response factor 2	Auxin_resp
Aco007113	brown	LG23	1732939	1733298	+	360	-	Non-specific lipid-transfer protein	-
Aco006096	brown	LG16	8938644	8941790	-	1716	-	Splicing factor 3A subunit	-
Aco015240	purple	LG05	1036921	1038593	+	1256	-	1-aminocyclopropane-1-carboxylate oxidase	2OG-FeII_Oxy
Aco014690	purple	LG20	9768739	9772637	+	1534	-	malate dehydrogenase	-
Aco025351	darkred	LG06	2776172	2777967	+	1360	-	Xyloglucan endotransglucosylase/hydrolase family protein	-
Aco008028	turquoise	LG21	8670443	8676365	+	1814	-	Acetolactate synthase small subunit	ACT
Aco026341	brown	LG10	5634433	5649532	+	1732	-	aspartic proteinase A1	Asp
Aco029553	cyan	scaffold_722	72809	73213	-	405	-	Cysteine proteinase inhibitor	-
Aco015925	brown	LG01	10427341	10435733	+	1677	-	Cation-efflux pump FieF	-
Aco021575	purple	LG05	9381068	9394424	-	817	-	hypothetical protein	-
Aco001635	purple	LG18	9118409	9122315	+	2485	-	Protein kinase superfamily protein	ABC1
Aco003139	purple	LG06	14066281	14071086	-	1746	-	alanine:glyoxylate aminotransferase	Aminotran_5
Aco019608	turquoise	LG09	10139442	10147487	+	1358	-	Glutathione S-transferase T1	GST_N
Aco010452	turquoise	LG03	2575324	2582500	-	3453	-	Ethylene receptor	Response_reg
Aco016145	cyan	LG21	1859968	1860309	+	342	-	Bifunctional inhibitor/lipid-transfer protein/seed storage 2S albumin superfamily protein	-
Aco009966	turquoise	LG10	1825539	1827601	-	1463	-	Clavaminate synthase-like protein	-
Aco024818	turquoise	LG04	9872783	9888369	+	3064	-	pyruvate orthophosphate dikinase	-
Aco001944	blue	LG18	6612078	6616458	-	963	-	Superoxide dismutase Cu-Zn	-
Aco004041	brown	LG15	1818406	1822000	-	2900	-	hypothetical protein	-
Aco030324	brown	scaffold_949	17318	21021	+	763	-	Heavy metal transport/detoxification superfamily protein	HMA
Aco013954	blue	LG03	978535	981828	-	1303	-	Aquaporin-like superfamily protein	-
Aco000798	darkred	LG02	16599258	16607317	+	2861	-	glycerophosphoryl diester phosphodiesterase	-
Aco002052	brown	LG04	5230696	5240555	-	3670	-	Pre-rRNA-processing protein IPI1-1	-
Aco002247	turquoise	LG04	2959269	2961510	-	1733	-	hypothetical protein	-
Aco013740	darkred	LG13	10705727	10710062	+	1961	-	Pectin lyase-like superfamily protein	-
Aco013110	purple	LG25	464534	507090	+	696	-	Peptidyl-prolyl cis-trans isomerase 5.2.1.8	Pro_isomerase
Aco004002	purple	LG15	2104629	2113390	-	2166	-	phytoene desaturase 3	Amino_oxidase
Aco016335	purple	LG03	10619044	10621861	-	2070	-	Major facilitator superfamily protein	Sugar_tr
Aco016307	turquoise	LG03	10865604	10867983	-	1188	-	membrane steroid binding protein 1	-
Aco023517	purple	LG04	339729	343547	-	1711	-	S-adenosylmethionine synthase 2.5.1.6	-
Aco006329	turquoise	LG14	3171797	3179676	-	1384	-	Lipase	Lipase_3
Aco007628	turquoise	LG08	844556	847812	-	423	-	hypothetical protein	-
Aco010196	brown	LG25	2943244	2950194	-	4300	-	Lipid A export ATP-binding/permease protein MsbA	ABC_membrane
Aco012599	brown	LG13	2613399	2615557	+	1181	-	NAC domain containing protein 2	NAM
Aco009971	brown	LG10	1893650	1904363	-	3544	-	RNA-dependent RNA polymerase family protein	-
Aco007928	turquoise	LG21	9472743	9478865	-	1877	-	Pyruvate dehydrogenase E1 component subunit alpha	-
Aco001535	purple	LG18	9845251	9848628	+	1493	-	Phosphatidylinositol transfer protein	IP_trans
Aco022846	brown	LG03	1354965	1360037	+	2997	-	Long-chain-alcohol oxidase FAO1	-
Aco015177	turquoise	LG05	1541682	1543314	+	1623	-	MATE efflux family protein	MatE
Aco010671	turquoise	LG10	2568861	2569679	+	661	-	hypothetical protein	-
Aco030221	cyan	scaffold_1961	2143	3198	+	1056	-	Plant protein of unknown function DUF247	-
Aco000176	purple	LG12	3988489	3994990	+	2791	-	ABCATP-binding family transporter	ABC_tran
Aco017566	brown	LG09	116488	120313	-	2006	-	COBRA-like protein	-
Aco002832	brown	LG06	11948269	11950413	-	1086	-	Pollen Ole e 1 allergen and extensin family protein	-
Aco007984	brown	LG21	9032663	9036550	+	1732	-	Ferrochelatase 4.99.1.1	-
Aco016421	purple	LG10	12018004	12024699	+	1399	-	3-ketoacyl-CoA thiolase	Thiolase_N
Aco012083	turquoise	LG02	1527261	1537560	+	2282	-	serine carboxypeptidase-like 29	Peptidase_S10
Aco003010	brown	LG06	13212468	13218340	+	1019	-	Cell number regulator	-
Aco011059	purple	LG04	14064357	14071860	-	2366	-	Glutamate-cysteine ligase	-
Aco008763	brown	LG09	2215949	2219366	+	2432	-	hypothetical protein	-
Aco013120	brown	LG25	368930	375157	+	2413	-	Endoglucanase	-
Aco018084	turquoise	LG11	8491542	8493183	-	1398	-	gibberellin 2-oxidase	2OG-FeII_Oxy
Aco010384	brown	LG03	1766695	1768592	+	586	-	Heavy metal transport/detoxification superfamily protein	HMA
Aco000085	cyan	LG12	4810679	4813979	+	1319	-	LIM domain-containing protein	-
Aco021236	brown	LG10	10982081	10984985	+	2041	-	Heavy metal transport/detoxification superfamily protein	HMA
Aco004106	brown	LG15	1338673	1341766	-	2059	-	myo-inositol-1-phosphate synthase 2	-
Aco013319	purple	LG15	11289073	11291657	-	1973	-	Allene oxide synthase 4.2.1.92	p450
Aco012519	turquoise	LG13	1763052	1768913	-	1690	-	Major facilitator superfamily protein	-
Aco000623	cyan	LG12	593183	594620	+	1032	-	NADP-binding Rossmann-fold superfamily protein	adh_short
novel.194	brown	LG03	6891377	6892477	+	1101	-	-	-
Aco004854	lightyellow	LG07	338171	341078	+	990	-	Ninja-family protein	-
Aco001570	turquoise	LG18	9596495	9604844	+	2811	-	AMP deaminase	-
Aco011442	brown	LG06	2118699	2126783	+	2102	-	Ubiquitin-specific protease family C19-related protein	-
Aco001851	purple	LG18	7422895	7426435	+	1694	-	cryptochrome 3	-
Aco007164	turquoise	LG23	2133500	2137538	+	1212	-	NADH:cytochrome B5 reductase 1	FAD_binding_6
Aco013876	blue	LG08	9363961	9367670	-	2009	-	Ankyrin repeat family protein	-
Aco008291	turquoise	LG19	9207654	9210127	+	1016	-	hypothetical protein	-
Aco009803	purple	LG10	556878	563199	-	1892	-	3-hydroxyisobutyryl-CoA hydrolase	-
Aco016606	turquoise	LG08	10345975	10348207	+	1291	-	Beta-carotene hydroxylase	-
Aco013251	cyan	LG24	975241	978256	-	457	-	60S ribosomal protein L34	-
Aco006972	lightyellow	LG22	10156076	10164873	+	3047	-	Phosphate transporter PHO1-2	SPX
Aco010707	turquoise	LG10	2948820	2952101	+	1600	-	Rhodanese-like domain-containing protein	-
Aco001673	brown	LG18	8845587	8848428	-	876	-	Stress responsive protein	-
Aco010645	turquoise	LG07	12222457	12237511	+	3480	-	2-succinylbenzoate-CoA ligase	AMP-binding
Aco004252	brown	LG15	377922	385223	-	2773	-	sulfate transporter	Sulfate_transp
Aco018002	turquoise	LG01	20600892	20615316	-	2012	-	polyADP-ribose glycohydrolase 2	-
Aco001394	turquoise	LG18	10827747	10833157	-	1297	-	Mitochondrial substrate carrier family protein	Mito_carr
Aco020108	brown	LG10	4747824	4753365	-	3186	-	auxin response factor 9	Auxin_resp
Aco011447	brown	LG06	2017283	2028621	-	4312	-	subtilisin-like serine protease 3	Peptidase_S8
Aco025369	turquoise	LG20	3533122	3541064	+	1433	-	alpha/beta-Hydrolases superfamily protein	-
Aco003388	turquoise	LG17	2487882	2511160	-	3355	-	12-oxophytodienoate reductase 2	Oxidored_FMN
Aco012001	cyan	LG03	14267846	14270807	+	1385	-	xyloglucan endotransglucosylase/hydrolase 32	-
Aco022762	brown	LG07	5433296	5436875	-	1747	-	Protein of Unknown Function DUF239	-
Aco014342	turquoise	LG05	619695	623241	-	1482	-	Aldehyde dehydrogenase family 2 member C4	Aldedh
Aco025969	blue	scaffold_1038	42819	46832	-	2249	-	Ankyrin repeat family protein	-
Aco006790	turquoise	LG01	21902244	21906646	-	1460	-	GDSL esterase/lipase	Lipase_GDSL
Aco031156	turquoise	LG02	9325477	9326028	+	438	-	expansin A8	-
Aco021534	brown	LG23	4749660	4761464	+	2698	-	alpha 1%2C4-glycosyltransferase family protein	Gly_transf_sug
Aco017114	brown	LG14	11517480	11520994	-	2553	-	C2 calcium/lipid-binding plant phosphoribosyltransferase family protein	C2
Aco029372	darkred	scaffold_1554	15973	16401	+	429	-	Bifunctional inhibitor/lipid-transfer protein/seed storage 2S albumin superfamily protein	-
Aco012596	turquoise	LG13	2559165	2562609	-	2252	-	Zinc finger CCCH domain-containing protein	RRM_1
Aco005397	turquoise	LG11	9841218	9851574	-	1445	-	cinnamoyl coa reductase	-
Aco012533	blue	LG13	1862440	1863744	-	1305	-	CBL-interacting protein kinase 2	Pkinase
Aco017275	brown	LG03	16377020	16380004	-	1069	-	hypothetical protein	-
Aco012538	blue	LG13	1928089	1928979	+	891	-	ovate family protein 1	-
Aco005838	lightcyan	LG16	11029677	11032888	-	1834	-	DCD Development and Cell Death domain protein	-
Aco017259	turquoise	LG03	16501067	16504970	+	1537	-	hypothetical protein	-
Aco006684	turquoise	LG01	22719606	22724280	-	1682	-	MtN19-like protein	-
Aco001828	darkred	LG18	7618270	7619628	-	1359	-	xyloglucan xylosyltransferase 5	-
Aco009580	turquoise	LG01	1144178	1160325	-	7239	-	acetyl-CoA carboxylase 1	Carboxyl_trans
Aco002824	lightcyan	LG06	11885237	11886334	-	1098	-	Ethylene-responsive transcription factor	AP2
Aco009518	brown	LG01	1606068	1612228	-	2756	-	Protein kinase superfamily protein	Pkinase_Tyr
Aco011646	turquoise	LG08	12532517	12536984	-	1439	-	Protein kinase superfamily protein	Pkinase
Aco022675	turquoise	LG02	6021948	6031641	-	2570	-	Protein VERNALIZATION INSENSITIVE	-
Aco013541	cyan	LG20	1165590	1172569	-	3496	-	lipoxygenase 3	Lipoxygenase
Aco007987	turquoise	LG21	9015365	9015865	+	501	-	Protein of unknown function%2C DUF538	-
Aco005293	cyan	LG07	3786276	3811126	-	3844	-	Protein NRT1/ PTR FAMILY 2.11	-
Aco002863	darkred	LG06	12170141	12173613	+	1922	-	AP2-like ethylene-responsive transcription factor	AP2
Aco004861	darkred	LG07	386037	387479	+	1443	-	UDP-glucose 6-dehydrogenase family protein	-
Aco001853	darkred	LG18	7410417	7415362	+	1839	-	UDP-glucuronic acid decarboxylase 1	-
Aco016705	darkred	LG17	246012	251605	-	2261	-	calmodulin-binding family protein	-
Aco010877	cyan	LG12	5970601	5983243	+	2807	-	hypothetical protein	-
Aco002324	turquoise	LG04	2436838	2440916	-	1925	-	non-specific phospholipase C2	Phosphoesterase
Aco000360	turquoise	LG12	2424124	2428725	-	1831	-	spermidine synthase 3	-
Aco010382	brown	LG03	1732474	1738869	-	1922	-	PLAC8 family protein	-
Aco006021	darkred	LG16	9668899	9672563	-	2512	-	UDP-glucose 4-epimerase	-
Aco017364	brown	LG01	23790435	23792033	+	1275	-	Ninja-family protein	-
Aco018518	turquoise	LG06	14386200	14386439	-	240	-	hypothetical protein	-
Aco000848	turquoise	LG02	16241911	16245988	-	1506	-	Transmembrane proteins 14C	-
Aco028330	cyan	LG04	8516557	8524899	-	2526	-	oxidoreductase%2C 2OG-FeII oxygenase family protein	-
Aco014579	turquoise	LG08	2082017	2086199	-	988	-	Cyanate hydratase	Cyanate_lyase
Aco013938	purple	LG03	1146495	1148012	-	1305	-	Protein kinase superfamily protein	Pkinase
novel.689	brown	LG11	71883	78735	+	3595	-	PF00271:Helicase conserved C-terminal domain|PF00270:DEAD/DEAH box helicase	DEAD
Aco023289	brown	LG04	12741105	12742717	-	1011	-	Stress responsive protein	-
Aco013351	brown	LG15	10997155	11002846	-	2353	-	squalene monooxygenase 2	-
Aco001847	purple	LG18	7454075	7454800	-	726	-	Protein of unknown function%2C DUF538	-
Aco006199	turquoise	LG16	8035352	8043143	+	2161	-	Glucose-1-phosphate adenylyltransferase family protein	-
Aco006774	turquoise	LG01	22027377	22035488	-	2175	-	5'-AMP-activated protein kinase beta-2 subunit protein	DSPc
Aco014965	brown	LG04	11075625	11083676	-	2197	-	Protein NRT1/ PTR FAMILY 3.1	-
novel.322	turquoise	LG05	1156191	1160222	+	1845	-	PF00271:Helicase conserved C-terminal domain|PF00270:DEAD/DEAH box helicase	DEAD
Aco003857	purple	LG15	3295493	3303821	+	2408	-	Cytochrome P450 flavonoid 3'%2C5'-hydroxylase	p450
Aco014183	blue	LG13	680585	683534	-	2391	-	Glucan endo-1%2C3-beta-glucosidase	Glyco_hydro_17
Aco005603	brown	LG11	11626165	11635401	+	3387	-	trehalose-6-phosphate synthase	-
Aco015397	cyan	LG23	259924	273522	+	6738	-	Phosphorylase 2.4.1.1	-
Aco024042	turquoise	LG16	907052	914051	-	2046	-	receptor kinase 3	Pkinase
Aco002445	darkred	LG04	1523140	1524183	-	1044	-	Calcium-dependent lipid-binding CaLB domain family protein	C2
Aco004137	brown	LG15	1113629	1114909	-	1281	-	Kelch-like protein	Kelch_1
Aco006609	turquoise	LG14	1000797	1005852	-	2457	-	Trypsin family protein	-
Aco005277	brown	LG07	3628308	3630709	-	2001	-	HXXXD-type acyl-transferase family protein	-
Aco003008	brown	LG06	13196354	13202015	+	2647	-	Agenet and bromo-adjacent homology BAH domain-containing protein	Agenet
Aco019822	turquoise	LG07	4015393	4020897	-	1972	-	Riboflavin biosynthesis protein RibF	-
Aco000559	brown	LG12	1028661	1034063	-	1386	-	Zinc transporter	-
Aco018593	turquoise	LG01	20955205	20965648	-	2211	-	Membrane protein insertase YidC	-
Aco004478	brown	LG05	3481480	3485891	+	1745	-	FASCICLIN-like arabinogalactan 6	-
Aco009208	turquoise	LG22	8479629	8483913	+	2111	-	Calcium-dependent protein kinase family protein	Pkinase
Aco016414	brown	LG10	12085218	12098596	-	2459	-	hypothetical protein	-
Aco008995	turquoise	LG09	12667227	12669618	+	1022	-	Calcium-dependent lipid-binding CaLB domain family protein	C2
Aco006786	darkred	LG01	21932572	21949794	-	4072	-	Alpha/beta hydrolase related protein	-
Aco004440	brown	LG05	3209727	3211038	-	778	-	plasma-membrane associated cation-binding protein 1	-
Aco019261	brown	LG13	3583280	3590290	-	2072	-	Multidrug resistance protein MdtG	MFS_1
Aco003292	brown	LG17	1789835	1794978	+	1860	-	Regulator of chromosome condensation RCC1 family protein	-
Aco011850	darkred	LG08	11060871	11066036	-	3229	-	U-box domain-containing protein	U-box
Aco011259	brown	LG01	12967797	12995032	-	5105	-	beta-galactosidase 10	-
Aco017866	purple	LG04	12052899	12063223	+	2030	-	MATE efflux family protein	MatE
Aco018523	turquoise	LG06	14407875	14411917	-	1870	-	Probable aminoacylase I	Peptidase_M20
Aco030335	purple	scaffold_2563	2	3425	-	1563	-	beta-amylase 3	-
Aco022032	turquoise	LG21	3868105	3877333	+	2127	-	Glycosyl hydrolase superfamily protein	-
Aco004355	turquoise	LG05	2463737	2464838	-	330	-	Cathepsin S	Peptidase_C1
Aco029319	cyan	scaffold_1724	598	4162	-	1093	-	60S ribosomal protein L7-4	-
Aco004856	darkred	LG07	349433	354368	-	4165	-	receptor-like protein kinase 2	Pkinase
Aco009567	turquoise	LG01	1281233	1284774	-	901	-	P-type ATPase of Arabidopsis 2	HMA
Aco006134	brown	LG16	8614003	8618706	+	1540	-	Protein of unknown function%2C DUF642	-
Aco012561	purple	LG13	2174302	2180842	+	1677	-	Cysteine desulfurase	Aminotran_5
Aco007035	turquoise	LG23	1202729	1207274	+	2467	-	IQ-domain 2	-
Aco004135	brown	LG15	1153790	1159312	+	2258	-	sucrose transporter 2	-
Aco004821	turquoise	LG07	99092	101079	+	1756	-	Cytochrome P450 superfamily protein	p450
Aco021249	cyan	LG10	11200173	11208765	+	3025	-	hypothetical protein	-
Aco025834	turquoise	LG03	5294260	5300512	-	3255	-	Protein of unknown function DUF3741	-
Aco012545	brown	LG13	2029107	2031248	+	511	-	Non-specific lipid-transfer protein	-
Aco012556	purple	LG13	2128646	2135532	+	1949	-	Protein kinase superfamily protein	ABC1
Aco003087	cyan	LG06	13745807	13748298	+	1895	-	Transmembrane protein	-
Aco001818	darkred	LG18	7683469	7686494	+	1827	-	COBRA-like protein	-
Aco009330	turquoise	LG22	7950316	7952628	-	1300	-	Zim17-type zinc finger protein	-
Aco004844	brown	LG07	254634	258649	-	1909	-	Cytochrome P450 superfamily protein	p450
Aco015255	blue	LG05	905032	915801	+	3164	-	aminopeptidase M1	-
Aco012270	turquoise	LG01	3568992	3583223	-	5390	-	Xanthine dehydrogenase	Fer2
Aco009583	darkred	LG01	1114039	1124612	+	6414	-	Myosin heavy chain-related protein	-
Aco004000	darkred	LG15	2120860	2128443	-	3301	-	Protein kinase superfamily protein	Pkinase_Tyr
Aco019533	darkred	LG07	11391368	11401808	+	2568	-	hypothetical protein	-
novel.660	cyan	LG10	11752198	11753183	+	986	-	-	-
Aco007985	brown	LG21	9029828	9031887	+	752	-	Ferrochelatase 4.99.1.1	-
Aco018538	purple	LG06	14532188	14534498	+	1457	-	PLATZ transcription factor family protein	-
Aco005662	brown	LG11	12055547	12058914	-	1535	-	Pollen-specific protein SF21	Ndr
Aco027543	cyan	scaffold_605	53991	56131	+	949	-	Small heat shock protein	-
Aco012306	turquoise	LG01	3211187	3216244	-	1998	-	beta-hexosaminidase 2	Glyco_hydro_20
Aco009630	turquoise	LG01	808895	818207	+	953	-	Glucan endo-1%2C3-beta-glucosidase	-
Aco008519	turquoise	LG09	459440	462770	+	529	-	Eukaryotic translation initiation factor 5A	-
Aco010493	brown	LG07	13473331	13484103	+	1794	-	MATE efflux family protein	MatE
Aco001849	cyan	LG18	7437060	7439177	+	869	-	Dormancy/auxin associated family protein	-
Aco020178	brown	LG18	4744966	4750138	+	4370	-	Magnesium-chelatase subunit H 6.6.1.2	-
Aco012481	purple	LG13	1471142	1475855	-	1994	-	pyruvate decarboxylase-2	TPP_enzyme_N
Aco028587	cyan	scaffold_1105	1547	5863	-	966	-	cysteine-rich receptor-like protein kinase	-
Aco014984	brown	LG04	11389570	11391798	+	998	-	early nodulin-like protein 18	Cu_bind_like
Aco018860	turquoise	LG08	13094861	13103764	-	2421	-	5-dehydro-2-deoxygluconokinase	PfkB
Aco019066	purple	LG20	43201	47940	-	1542	-	RNA binding	-
Aco007162	turquoise	LG23	2119186	2120922	+	741	-	hypothetical protein	-
novel.658	brown	LG10	11237344	11238152	+	751	-	-	-
Aco006546	brown	LG14	1441608	1472756	+	4923	-	DNA ligase 6.5.1.1	DNA_ligase_A_M
Aco006911	darkred	LG22	9712185	9724634	-	4878	-	myosin 2	Myosin_head
Aco003985	brown	LG15	2273734	2278942	-	1698	-	3-ketoacyl-CoA synthase 10	-
Aco000498	cyan	LG12	1452833	1459338	-	1636	-	sterol C4-methyl oxidase 1-2	-
Aco008876	brown	LG09	11722859	11725569	+	1794	-	UDP-Glycosyltransferase superfamily protein	UDPGT
Aco012156	brown	LG02	744674	747073	-	2400	-	subtilisin-like serine protease 2	Peptidase_S8
Aco009800	darkred	LG10	531331	533409	-	1796	-	HXXXD-type acyl-transferase family protein	-
Aco008670	purple	LG09	1451169	1452172	-	912	-	thaumatin-like protein	Thaumatin
Aco010214	turquoise	LG25	2811551	2813854	-	1259	-	2-oxoglutarate 2OG and FeII-dependent oxygenase superfamily protein	2OG-FeII_Oxy
Aco002620	brown	LG06	9761631	9766307	-	1749	-	Metal tolerance protein	-
Aco013614	cyan	LG13	11748318	11751819	+	1373	-	Single-stranded nucleic acid binding R3H protein	R3H
Aco005050	turquoise	LG07	1665445	1668689	+	514	-	hypothetical protein	-
Aco001848	darkred	LG18	7446344	7447466	+	1038	-	Late embryogenesis abundant protein Lea5	-
Aco007932	turquoise	LG21	9441641	9447670	+	2368	-	Protein kinase superfamily protein	Pkinase
Aco011006	brown	LG04	14494736	14502420	+	3976	-	Kinesin-like protein	Kinesin
Aco005442	turquoise	LG11	10233929	10239274	+	1860	-	Amino-acid permease	-
Aco024279	turquoise	LG05	9032763	9035015	-	2253	-	protein kinase family protein	Pkinase
Aco015295	brown	LG20	10351708	10355789	-	1894	-	18S pre-ribosomal assembly protein gar2-related	-
Aco003571	turquoise	LG17	3878905	3884433	+	2750	-	quinolinate synthase	-
Aco002760	turquoise	LG06	11360382	11366761	+	1683	-	2-oxoglutarate/malate translocator	Na_sulph_symp
Aco020556	turquoise	LG04	9386372	9387919	-	1548	-	Mitochondrial transcription termination factor family protein	-
Aco011984	brown	LG03	14105070	14109259	-	2580	-	F-box/LRR-repeat protein	-
Aco000023	brown	LG16	6796543	6804828	-	3055	-	ubiquitin-conjugating enzyme 23	UQ_con
Aco026238	turquoise	LG10	9952796	9955656	-	763	-	hypothetical protein	-
Aco003848	turquoise	LG15	3369766	3373869	-	1029	-	Cell division topological specificity factor	-
Aco000197	turquoise	LG12	3793028	3797066	+	1207	-	Prolyl 4-hydroxylase subunit alpha-1	2OG-FeII_Oxy
Aco012178	cyan	LG02	610292	614894	+	1484	-	O-fucosyltransferase family protein	-
Aco026397	cyan	scaffold_650	9028	10484	+	696	-	hypothetical protein	-
Aco011315	purple	LG01	12461624	12472577	-	3273	-	Cytochrome P450	p450
Aco012114	purple	LG02	1156228	1162673	-	1914	-	diacylglycerol kinase 7	-
Aco009964	cyan	LG10	1797218	1800401	-	3087	-	Leucine-rich receptor-like protein kinase family protein	Pkinase
novel.1061	turquoise	LG18	6540820	6542801	-	943	-	-	-
Aco013490	brown	LG20	695658	700455	-	2296	-	hypothetical protein	-
Aco007743	brown	LG08	1686871	1693387	-	2757	-	S-adenosyl-L-methionine-dependent methyltransferases superfamily protein	-
Aco018099	darkred	LG11	8215915	8246980	+	3292	-	Protein kinase superfamily protein	Pkinase_Tyr
Aco006411	brown	LG14	2503762	2514817	-	4101	-	Kinesin-like protein	Kinesin
Aco029898	darkred	scaffold_888	11954	15045	+	2569	-	Heavy metal transport/detoxification superfamily protein	HMA
Aco013123	cyan	LG25	338068	341853	-	1526	-	Transcription initiation factor IIB	TFIIB_Zn_Ribbon
Aco000480	purple	LG12	1572822	1578404	+	3154	-	Phosphomethylpyrimidine synthase	-
Aco008715	brown	LG09	1797959	1803834	-	2794	-	ERD early-responsive to dehydration stress family protein	-
Aco023553	purple	LG07	5831404	5843908	+	1767	-	5'-nucleotidase SurE	-
Aco026064	blue	LG13	9507819	9517261	+	1764	-	2%2C3-bisphosphoglycerate-independent phosphoglycerate mutase	-
Aco018073	turquoise	LG11	8700937	8716220	+	3532	-	Cytochrome P450 superfamily protein	p450
Aco014946	purple	LG04	10816469	10822251	-	2713	-	1-deoxy-D-xylulose 5-phosphate synthase 1	-
Aco014192	purple	LG13	720996	725668	+	2313	-	U-box domain-containing protein	U-box
Aco013744	purple	LG13	10636820	10638351	+	1173	-	hypothetical protein	-
Aco012589	turquoise	LG13	2479068	2487435	-	2034	-	Bifunctional protein HldE	CTP_transf_2
Aco028092	brown	LG03	6161103	6199956	+	4793	-	CLIP-associating protein	-
Aco009701	brown	LG01	225106	225666	-	561	-	hypothetical protein	-
Aco015450	lightcyan	LG23	635242	638677	-	2599	-	hypothetical protein	GRAS
Aco006866	turquoise	LG22	9398793	9402226	-	1112	-	ubiquitin conjugating enzyme 4	UQ_con
Aco014160	blue	LG13	506064	512304	-	3658	-	Regulator of chromosome condensation RCC1 family protein	-
Aco007228	brown	LG23	2575817	2579042	-	1028	-	tubulin beta chain 2	Tubulin
Aco029869	cyan	scaffold_1023	17546	21136	+	3591	-	Disease resistance protein	NB-ARC
Aco002538	brown	LG04	842796	847403	+	1295	-	ADP-ribosylation factor 3	Arf
Aco002817	brown	LG06	11804871	11806567	-	852	-	Lipase/lipooxygenase%2C PLAT/LH2 family protein	-
Aco011787	turquoise	LG08	11496162	11498634	+	1396	-	RING-H2 finger protein 2B	-
Aco017037	brown	LG08	13768078	13775590	+	2660	-	receptor-like kinase 902	Pkinase
Aco017549	darkred	LG22	2015987	2037837	-	3281	-	vacuolar iron transporter VIT family protein	-
Aco014412	brown	LG07	14521398	14527536	-	4864	-	F-box family protein	-
Aco017215	cyan	LG18	253966	257546	+	931	-	CBS domain protein	-
Aco003165	cyan	LG06	14219298	14222477	-	1906	-	O-fucosyltransferase family protein	-
Aco013134	purple	LG25	214837	217906	-	1943	-	cytochrome P450%2C family 706%2C subfamily A%2C polypeptide 4	p450
Aco015454	brown	LG23	678347	680933	+	1697	-	myb domain protein 97	-
Aco017326	turquoise	LG01	23528224	23536266	-	2543	-	Lipid A export ATP-binding/permease protein MsbA	ABC_membrane
Aco004902	turquoise	LG07	685130	689564	+	1378	-	Prolyl 4-hydroxylase subunit alpha-1	-
Aco019396	turquoise	LG06	7593218	7596837	+	1131	-	Protein of unknown function DUF3550/UPF0682	-
Aco001630	turquoise	LG18	9156884	9165593	-	1571	-	alpha-galactosidase 2	-
Aco005101	turquoise	LG07	2037352	2041436	+	2817	-	inositol transporter 2	Sugar_tr
Aco000806	purple	LG02	16548741	16555568	-	2983	-	fimbrin-like protein 2	CH
Aco015866	blue	LG01	11212077	11216636	-	1174	-	Prostamide/prostaglandin F synthase	-
Aco015235	brown	LG05	1061710	1063884	+	1248	-	Tetraspanin family protein	Tetraspannin
Aco013253	purple	LG24	995932	1000060	+	2161	-	Glycerol-3-phosphate transporter	MFS_1
Aco021173	purple	LG14	10398320	10406583	+	1201	-	D-tyrosyl-tRNATyr deacylase	-
Aco010163	purple	LG25	3167472	3175541	-	4713	-	Multidrug resistance protein ABC transporter family	ABC_tran
Aco017743	brown	LG05	6791189	6795241	-	1149	-	30S ribosomal protein	-
Aco012911	turquoise	LG03	15713178	15716492	+	1616	-	tobamovirus multiplication 2A	Tetraspannin
Aco003129	turquoise	LG06	14012972	14013977	-	924	-	Protein of unknown function DUF506	-
Aco008866	brown	LG09	11608420	11614146	-	2251	-	synaptotagmin A	C2
Aco002829	brown	LG06	11926310	11929893	+	2643	-	beta-D-xylosidase 4	Glyco_hydro_3_C
Aco006956	turquoise	LG22	10025143	10027866	+	969	-	Peroxisomal membrane 22 kDa Mpv17/PMP22 family protein	Mpv17_PMP22
Aco017933	purple	LG09	9478358	9512664	+	2574	-	FAD/NADP-binding oxidoreductase family protein	FAD_binding_3
Aco000357	brown	LG12	2451144	2455648	-	1740	-	TRICHOME BIREFRINGENCE-LIKE 26	-
Aco019805	lightcyan	LG07	4204873	4212434	+	2599	-	ATP-dependent zinc metalloprotease FtsH	-
Aco006783	darkred	LG01	21977141	21986743	+	4576	-	Pleiotropic drug resistance%2C ABC transporter family protein	ABC2_membrane
Aco014318	lightyellow	LG05	415694	418972	+	2276	-	ADP%2CATP carrier protein	-
Aco005506	turquoise	LG11	10807269	10812074	-	1831	-	Protein phosphatase 2C family protein	PP2C
novel.447	blue	LG06	14264406	14268260	-	2515	-	PF03017:TNP1/EN/SPM transposase|PF03004:Plant transposase (Ptta/En/Spm family)	-
Aco023292	brown	LG04	12663140	12684061	-	7091	-	disease resistance protein TIR-NBS-LRR class	NB-ARC
Aco006507	darkred	LG14	1784563	1791791	+	3458	-	Ubiquitin carboxyl-terminal hydrolase	UCH
Aco004779	darkred	LG05	5727104	5734124	-	3273	-	U-box domain-containing protein	U-box
Aco002015	purple	LG04	5612296	5614444	-	1107	-	2-oxoglutarate 2OG and FeII-dependent oxygenase superfamily protein	2OG-FeII_Oxy
Aco011025	brown	LG04	14294353	14296970	-	1477	-	Tetraspanin family protein	Tetraspannin
Aco010022	cyan	LG10	2239632	2241785	-	2154	-	F-box protein MAX2	-
Aco006987	turquoise	LG22	10258312	10261737	-	2633	-	Phenylalanine ammonia-lyase 4.3.1.24	-
Aco000171	purple	LG12	4053354	4057119	+	1175	-	thioredoxin domain-containing protein-like protein	-
Aco000656	turquoise	LG12	397791	403269	+	1002	-	uncharacterized protein	-
Aco011781	turquoise	LG08	11533456	11538166	-	1799	-	Magnesium transporter MRS2-4	-
Aco009526	turquoise	LG01	1562084	1565667	-	2800	-	Protein WEAK CHLOROPLAST MOVEMENT UNDER BLUE LIGHT	-
Aco022841	turquoise	LG03	1407010	1408363	+	565	-	beta glucosidase 46	Glyco_hydro_1
Aco019310	turquoise	LG03	9928922	9932476	-	1049	-	hypothetical protein	-
Aco004226	cyan	LG15	560067	564168	+	3879	-	Protein of unknown function DUF506	-
Aco013748	turquoise	LG13	10528611	10530663	-	1060	-	Protein of unknown function DUF581	-
Aco002027	cyan	LG04	5490826	5497560	-	1820	-	Transposon protein%2C CACTA%2C En/Spm sub-class	-
Aco027228	darkred	LG07	7636210	7656096	-	2637	-	calcium-dependent protein kinase 28	Pkinase
Aco009099	darkred	LG09	13316820	13318541	+	1722	-	GRAS family transcription factor	GRAS
Aco004611	turquoise	LG05	4416254	4422322	+	2008	-	CBS domain containing protein	CBS
Aco008536	darkred	LG09	569696	571352	-	785	-	Gibberellin-regulated protein	-
Aco022888	turquoise	LG12	9691245	9694095	-	1983	-	WRKY DNA-binding protein 31	WRKY
Aco011538	brown	LG06	828303	834309	+	2043	-	hypothetical protein	-
Aco016112	turquoise	LG21	1472234	1476869	+	2036	-	Adenosylhomocysteinase 3.3.1.1	-
Aco011100	cyan	LG04	13732847	13734135	-	348	-	Macrophage migration inhibitory factor family protein	MIF
Aco022397	turquoise	LG02	4147507	4155173	-	2093	-	hypothetical protein	-
Aco031844	turquoise	scaffold_3456	978	1331	+	354	-	zinc finger protein 2	-
Aco008598	brown	LG09	1003491	1007371	-	2726	-	Cellulose-synthase-like C5	-
Aco005448	brown	LG11	10297335	10301716	+	2320	-	receptor-like kinase 1	Pkinase_Tyr
Aco008633	darkred	LG09	1240231	1244984	+	2873	-	Protein kinase superfamily protein	Pkinase
Aco009626	brown	LG01	834891	838386	-	1535	-	Protein of unknown function DUF1997	-
Aco003131	brown	LG06	14020489	14025911	-	2072	-	microtubule-associated proteins 65-1	-
Aco024451	brown	LG23	6173181	6197182	-	3413	-	respiratory burst oxidase homolog B	-
Aco014224	brown	LG13	932089	937386	+	1808	-	Protein RecA	-
Aco002090	brown	LG04	4777975	4787771	-	1397	-	Tyrosyl-DNA phosphodiesterase	Exo_endo_phos
Aco006890	lightcyan	LG22	9561866	9568706	+	2626	-	2-phosphoglycerate kinase	-
Aco009645	turquoise	LG01	717276	734477	-	8500	-	Golgi-body localization protein domain-containing protein	-
Aco009489	brown	LG01	1850174	1857727	-	2713	-	inter-alpha-trypsin inhibitor heavy chain-related	-
Aco018572	cyan	LG01	21203448	21205755	-	1744	-	Phospholipase A1-II	Lipase_3
Aco012681	brown	LG05	13651050	13654232	+	2271	-	Protein O-linked-mannose beta-1%2C4-N-acetylglucosaminyltransferase	-
Aco010972	purple	LG04	14710682	14738805	-	4138	-	Kinesin-like protein	Kinesin
Aco013735	purple	LG13	10745537	10750127	-	1227	-	Fe/S biogenesis protein NfuA	-
Aco007940	cyan	LG21	9354087	9361541	-	3125	-	ATP-dependent zinc metalloprotease FtsH	AAA
Aco005145	turquoise	LG07	2501220	2502356	-	789	-	hypothetical protein	-
Aco020163	blue	LG09	6350712	6382692	-	1917	-	Peptidyl-prolyl cis-trans isomerase D	FKBP_C
Aco010700	brown	LG10	2831383	2918456	-	3665	-	cyclic nucleotide gated channel 1	Ion_trans
Aco004586	purple	LG05	4199729	4203727	+	768	-	RPM1 interacting protein 4	-
Aco010754	turquoise	LG10	3434498	3445643	-	3101	-	Proteasome-activating nucleotidase	AAA
Aco015624	brown	LG19	1090659	1100996	+	2837	-	fimbrin-like protein 2	CH
Aco026025	turquoise	LG10	9404285	9405661	+	537	-	hypothetical protein	-
Aco007393	purple	LG23	4430846	4433093	-	483	-	Major pollen allergen Bet v 1-C	-
Aco004996	purple	LG07	1308303	1311170	+	1462	-	malate dehydrogenase	-
Aco014895	turquoise	LG14	219501	223170	+	982	-	NADPH dehydrogenase quinone	FMN_red
Aco001709	turquoise	LG18	8559603	8562570	+	926	-	HISTIDINE TRIAD NUCLEOTIDE-BINDING 2	HIT
Aco025579	brown	LG02	8102514	8107364	-	1060	-	Isoaspartyl peptidase/L-asparaginase	Asparaginase_2
Aco014680	cyan	LG20	9846765	9848473	+	1568	-	NAC domain containing protein 100	NAM
Aco021760	brown	LG11	7718297	7726395	-	978	-	Auxin-responsive protein	-
Aco005619	cyan	LG11	11751342	11759405	-	3088	-	Chaperone protein ClpB	AAA
Aco028187	blue	scaffold_1272	27078	34009	+	2480	-	Long-chain-fatty-acid-CoA ligase	AMP-binding
Aco003875	brown	LG15	3171118	3176766	+	1952	-	beta glucosidase 40	Glyco_hydro_1
Aco017769	turquoise	LG21	58079	64162	-	2719	-	Acetyl-coenzyme A synthetase	AMP-binding
Aco019240	turquoise	LG16	1494975	1495271	-	297	-	Lipid transfer protein	-
novel.1439	blue	scaffold_1277	10631	18313	+	6127	-	PF02992:Transposase family tnp2|PF13960:Domain of unknown function (DUF4218)|PF03017:TNP1/EN/SPM transposase|PF03004:Plant transposase (Ptta/En/Spm family)|PF13963:Transposase-associated domain|PF13952:Domain of unknown function (DUF4216)	Transposase_21
Aco006083	brown	LG16	9021095	9050806	-	6365	-	UDP-Glycosyltransferase superfamily protein	UDPGT
Aco013513	brown	LG20	885799	899667	+	3234	-	cellulose synthase like G2	-
Aco004613	darkred	LG05	4458890	4468179	-	1763	-	Peroxidase superfamily protein	-
Aco013406	turquoise	LG15	10409831	10412413	-	1662	-	purple acid phosphatase 3	-
Aco011532	turquoise	LG06	894517	897505	-	948	-	Calcineurin subunit B	-
novel.1545	cyan	scaffold_1919	10	4500	-	4491	-	PF00931:NB-ARC domain	NB-ARC
Aco004094	cyan	LG15	1426509	1432003	+	1995	-	WD repeat-containing protein	-
Aco009552	brown	LG01	1373300	1390092	+	3645	-	alcohol dehydrogenase 1	ADH_N
Aco012535	darkred	LG13	1909168	1911312	+	2145	-	U-box domain-containing protein	U-box
Aco013577	cyan	LG20	1513326	1515471	+	907	-	Disease resistance-responsive dirigent-like protein family protein	-
Aco024410	turquoise	LG16	4447093	4461593	-	1576	-	Delta-aminolevulinic acid dehydratase	-
Aco018016	blue	LG01	20404464	20410663	+	2939	-	Cysteine-tRNA ligase	tRNA-synt_1e
Aco012584	blue	LG13	2403051	2404282	-	1107	-	Protein of unknown function DUF567	-
Aco009946	cyan	LG10	1648808	1650079	+	1272	-	Zinc finger CCCH domain-containing protein	zf-CCCH
Aco016959	darkred	LG11	1162830	1169767	-	3086	-	ubiquitin fusion degradation 1	UFD1
Aco022569	turquoise	LG09	6967940	6974788	+	2299	-	calcium-dependent protein kinase 19	Pkinase
Aco009791	brown	LG10	451764	462117	-	4933	-	ABC transporter	ABC2_membrane
Aco022955	blue	LG08	3148715	3155099	-	797	-	hypothetical protein	-
Aco013874	darkred	LG08	9331442	9336773	+	1294	-	alpha/beta-Hydrolases superfamily protein	-
Aco008674	cyan	LG09	1470837	1473741	-	1653	-	Alpha N-terminal protein methyltransferase	-
Aco007762	turquoise	LG21	10591816	10599295	+	2045	-	Pyruvate kinase 2.7.1.40	PK
Aco014404	purple	LG07	14591684	14593303	+	1620	-	Solute carrier family 22 member	Sugar_tr
Aco026349	turquoise	LG19	6874928	6902161	+	1304	-	Kynurenine formamidase	-
Aco012183	darkred	LG02	573607	582984	+	3559	-	respiratory burst oxidase protein F	-
Aco012878	turquoise	LG03	15416426	15419340	+	1067	-	cyclin p4	-
Aco002460	turquoise	LG04	1430264	1435175	+	1520	-	E3 ubiquitin-protein ligase BAH1	zf-C3HC4
Aco003946	cyan	LG15	2602983	2605034	-	1727	-	Mitochondrial substrate carrier family protein	Mito_carr
Aco013463	darkred	LG15	9414010	9416523	-	673	-	early nodulin-like protein 22	Cu_bind_like
Aco014081	lightcyan	LG03	105655	109257	+	2049	-	Calcium-binding endonuclease/exonuclease/phosphatase family	Exo_endo_phos
Aco000844	darkred	LG02	16292307	16300606	+	2854	-	Sec14p-like phosphatidylinositol transfer family protein	CRAL_TRIO_N
Aco006464	brown	LG14	2117509	2127022	-	4956	-	Formin Homology 14	FH2
Aco006951	turquoise	LG22	9992965	9999522	+	2654	-	Phospholipid-sterol O-acyltransferase	-
Aco018893	lightyellow	LG20	7122356	7125613	-	2232	-	Leucine-rich repeat receptor-like protein kinase family protein	-
Aco026511	brown	LG18	2243843	2260402	-	1345	-	BHLH transcription factor	-
Aco014242	turquoise	LG13	1077930	1089602	+	3498	-	D6 protein kinase	Pkinase
Aco019777	turquoise	LG05	7650432	7654626	+	1378	-	BolA-like family protein	-
Aco024089	turquoise	LG20	6100817	6102420	+	1525	-	Cytochrome P450	p450
Aco011588	turquoise	LG06	335010	337865	-	1790	-	Chlorophyllide a oxygenase	-
Aco004506	brown	LG05	3638773	3641339	-	1030	-	hypothetical protein	-
Aco001035	darkred	LG02	14737059	14740054	+	2450	-	receptor-like kinase 902	Pkinase
Aco018879	turquoise	LG20	6919623	6921059	+	1437	-	Amino acid permease family protein%2C expressed amino acid permease	-
Aco020621	turquoise	LG02	11535496	11536467	-	972	-	Family of unknown function DUF716	-
Aco031266	turquoise	LG20	10048954	10051620	-	1369	-	hypothetical protein	-
Aco009502	brown	LG01	1748493	1757814	-	4833	-	COP1-interacting protein-related	-
Aco001260	turquoise	LG02	12926616	12928016	+	955	-	Glutathione S-transferase family protein	GST_N
Aco012094	turquoise	LG02	1386289	1400227	-	2861	-	5'-nucleotidase domain-containing protein	-
Aco013416	brown	LG15	10273492	10278191	-	3377	-	Protein kinase superfamily protein	Pkinase
Aco016350	turquoise	LG03	10386681	10387172	-	492	-	Ferredoxin-thioredoxin reductase%2C variable chain	-
Aco019860	brown	LG15	8748436	8753782	+	951	-	Phospholipase A2 family protein	-
Aco009178	turquoise	LG22	8213935	8217348	+	684	-	Cytokinin riboside 5'-monophosphate phosphoribohydrolase LOG	-
Aco004247	turquoise	LG15	417918	419657	+	931	-	Neurogenic locus notch protein-like protein	-
Aco000720	lightyellow	LG02	17222644	17223366	+	723	-	Protein of unknown function%2C DUF617	-
Aco008528	blue	LG09	500965	528487	+	4232	-	Cytochrome P450 superfamily protein	p450
Aco010336	darkred	LG25	1950443	1951286	+	626	-	Gibberellin-regulated family protein	-
Aco015197	lightyellow	LG05	1340143	1342601	+	1367	-	Inorganic pyrophosphatase	-
Aco004964	turquoise	LG07	1090191	1093426	-	1767	-	Core-2/I-branching beta-1%2C6-N-acetylglucosaminyltransferase family protein	-
Aco020439	brown	LG11	7069987	7077431	+	1858	-	Eukaryotic aspartyl protease family protein	-
Aco017531	cyan	LG22	1756241	1764698	+	1380	-	Calmodulin-binding protein-like protein	-
Aco011579	turquoise	LG06	387176	394347	-	1006	-	glutathione peroxidase 1	GSHPx
Aco000969	brown	LG02	15272538	15277448	-	3129	-	nucleobase-ascorbate transporter 7	-
Aco022096	brown	LG04	46726	50404	-	2580	-	basic helix-loop-helix bHLH DNA-binding superfamily protein	HLH
Aco015264	cyan	LG20	10107845	10113196	-	2039	-	Protein NRT1/ PTR FAMILY 6.4	-
Aco007929	brown	LG21	9462643	9468537	-	1626	-	Bifunctional uridylyltransferase/uridylyl-removing enzyme	ACT
Aco021666	brown	LG07	10701079	10716369	+	4338	-	ABC transporter G family member	ABC2_membrane
Aco013929	turquoise	LG08	9965979	9984650	-	2160	-	Glutathione S-transferase family protein	GST_N
Aco001358	purple	LG02	12013620	12016290	-	1460	-	1-aminocyclopropane-1-carboxylate oxidase	2OG-FeII_Oxy
Aco002660	brown	LG06	10365429	10377041	-	2361	-	Eukaryotic aspartyl protease family protein	-
Aco006274	turquoise	LG14	3679661	3683667	-	2619	-	Transcription elongation factor A protein	-
Aco000980	brown	LG02	15218076	15218487	+	192	-	Gibberellin-regulated family protein	-
Aco021653	darkred	LG16	7092847	7095892	+	2185	-	CBL-interacting protein kinase 12	Pkinase
Aco018554	darkred	LG06	14651502	14658263	-	1708	-	Nucleotide-sugar transporter family protein	-
Aco003740	cyan	LG15	4742075	4747040	-	2434	-	Zinc finger CCCH domain-containing protein	-
Aco027617	turquoise	LG14	7454936	7473569	+	2179	-	damaged DNA binding 2	-
Aco018107	turquoise	LG11	8134808	8137286	-	560	-	hypothetical protein	-
Aco007237	purple	LG23	2633795	2636071	+	1716	-	Cytochrome P450 superfamily protein	p450
Aco018580	lightcyan	LG01	21095346	21098084	+	1453	-	pirin	-
Aco011846	darkred	LG08	11091656	11092675	+	1020	-	Phosphate-responsive 1 family protein	-
Aco001227	darkred	LG02	13202979	13210684	+	2001	-	Phi-1-like phosphate-induced protein	-
Aco003590	darkred	LG17	4022248	4025083	-	2219	-	beta-1%2C4-N-acetylglucosaminyltransferase family protein	-
novel.1110	cyan	LG19	8293496	8310406	-	12220	-	-	-
Aco016238	brown	LG17	9876440	9883875	+	4116	-	hypothetical protein	-
Aco022311	purple	LG08	12790404	12791273	+	765	-	Protein of unknown function DUF581	-
Aco017701	turquoise	LG05	7250035	7255083	+	1716	-	auxin response factor 17	Auxin_resp
Aco028489	turquoise	LG19	3574664	3581175	+	1340	-	Tyrosine phosphatase family protein	-
Aco023020	brown	LG18	3275208	3279079	+	2864	-	ARM repeat superfamily protein	-
Aco019106	turquoise	LG06	8826068	8846157	-	3279	-	Efr3-like protein	-
Aco012057	cyan	LG03	14706283	14714384	+	3045	-	Protein NRT1/ PTR FAMILY 6.3	-
Aco019001	cyan	LG02	10750351	10755296	-	1686	-	Grain length and weight protein Seed length and weight protein long form for short seed	-
Aco005728	turquoise	LG11	12489650	12492532	-	990	-	Cleavage and polyadenylation specificity factor subunit	-
Aco009610	brown	LG01	928920	935693	-	2146	-	cellulose synthase-like A3	-
Aco012846	cyan	LG03	15131075	15132910	+	1530	-	homeobox-leucine zipper protein 4	HD-ZIP_N
Aco022059	cyan	LG05	12873897	12875497	-	1011	-	Protein of unknown function DUF1218	-
Aco023917	cyan	LG23	6825276	6830867	+	952	-	Glucose-6-phosphate isomerase%2C cytosolic	-
Aco004677	turquoise	LG05	4981281	4986966	+	1689	-	Transmembrane amino acid transporter family protein	Aa_trans
Aco010826	cyan	LG10	4308910	4311200	+	2110	-	Pectinesterase 3.1.1.11	-
Aco003240	darkred	LG17	1346540	1351966	-	2282	-	Neutral invertase-like protein	-
Aco005990	turquoise	LG16	9885630	9892485	-	3079	-	Histidine phosphotransfer protein	-
Aco025679	cyan	LG07	8516112	8521794	+	2057	-	70 kDa heat shock protein	HSP70
Aco006870	brown	LG22	9423216	9429591	+	1874	-	Receptor protein kinase%2Cexpressed	Pkinase
Aco003190	blue	LG17	990631	991764	-	727	-	Abscisic stress-ripening protein	-
Aco003071	turquoise	LG06	13650413	13651168	+	756	-	FASCICLIN-like arabinogalactan 1	-
Aco014510	cyan	LG07	13737649	13743133	+	3307	-	glutamate receptor 3.4	ANF_receptor
Aco029951	turquoise	scaffold_1768	11982	18009	+	1014	-	Eukaryotic protein of unknown function DUF914	-
Aco006501	brown	LG14	1842191	1855924	+	2993	-	tRNA-specific adenosine deaminase	-
Aco016124	purple	LG21	1567267	1571543	+	2089	-	Peptidyl-prolyl cis-trans isomerase	FKBP_C
Aco016860	darkred	LG04	15433577	15438193	+	1567	-	Phosphatidylinositol:ceramide inositolphosphotransferase	-
Aco007431	brown	LG12	12289262	12294947	+	1605	-	Galactosyltransferase family protein	Galactosyl_T
Aco018826	cyan	LG08	12856995	12864416	+	2630	-	SH2 domain protein B	-
Aco007022	darkred	LG23	1068617	1074643	-	3702	-	Respiratory burst oxidase-like protein	FAD_binding_8
Aco014264	lightyellow	LG05	97708	98814	-	961	-	hypothetical protein	-
Aco010015	cyan	LG10	2187779	2189581	+	1612	-	CBL-interacting protein kinase 12	Pkinase
Aco005925	brown	LG16	10386215	10389607	+	3393	-	Leucine-rich receptor-like protein kinase family protein	Pkinase
Aco031241	blue	scaffold_1868	1571	5319	-	2112	-	PLAC8 family protein	-
Aco005968	purple	LG16	10048178	10056615	+	2253	-	phosphofructokinase 3	PFK
Aco020749	brown	LG15	5049230	5051856	-	2146	-	ARM repeat superfamily protein	Arm
Aco003871	brown	LG15	3192869	3195519	+	1800	-	UDP-glucose 6-dehydrogenase family protein	-
Aco004375	cyan	LG05	2742280	2744947	+	1232	-	Abscisic acid receptor PYR1	-
Aco005080	brown	LG07	1882524	1887850	-	2867	-	Homeobox-leucine zipper protein family	START
Aco016288	turquoise	LG03	11107718	11113924	-	1320	-	hypothetical protein	-
Aco003100	turquoise	LG06	13825264	13825713	-	450	-	Chaperone protein DnaJ	DnaJ
Aco008392	darkred	LG19	10006048	10009199	+	1692	-	tubulin beta chain 2	Tubulin
Aco006446	blue	LG14	2242508	2248424	+	2454	-	RNA polymerase I specific transcription initiation factor RRN3 protein	RRN3
Aco027416	darkred	LG06	2921580	2922672	-	824	-	xyloglucan endotransglucosylase/hydrolase 25	-
Aco004453	brown	LG05	3292062	3307001	-	8091	-	Histidine kinase-%2C DNA gyrase B-%2C and HSP90-like ATPase family protein	-
Aco013892	turquoise	LG08	9563358	9568689	+	1123	-	Peroxisomal membrane protein 11-1	-
Aco012916	lightyellow	LG03	15739582	15743736	-	2207	-	Protein NRT1/ PTR FAMILY 7.3	-
Aco001879	brown	LG18	7174587	7176140	+	1327	-	Heavy metal transport/detoxification superfamily protein	HMA
Aco025857	brown	LG02	3745158	3756081	+	2800	-	Pyrophosphate-energized proton pump	-
Aco003999	turquoise	LG15	2133110	2134096	+	987	-	RING-H2 finger protein 2B	-
Aco018758	purple	LG11	2006735	2020192	-	2934	-	U-box domain-containing protein	V-ATPase_H
Aco022544	darkred	LG03	6055343	6114011	+	2795	-	Calcium-dependent lipid-binding CaLB domain family protein	Lipase_3
Aco000110	brown	LG12	4608260	4612021	-	843	-	Carbohydrate-binding X8 domain superfamily protein	-
Aco007808	cyan	LG21	10323619	10328502	+	2589	-	Lipid A export ATP-binding/permease protein MsbA	ABC_tran
Aco004091	brown	LG15	1464115	1467038	+	1392	-	trehalose-6-phosphate phosphatase	-
Aco001150	darkred	LG02	13835539	13842251	-	2929	-	beta-D-xylosidase 4	Glyco_hydro_3_C
Aco013557	cyan	LG20	1326730	1333183	-	1282	-	Protein of unknown function DUF3755	-
Aco005736	brown	LG11	12530135	12537338	-	3184	-	beta galactosidase 1	-
Aco018517	purple	LG06	14369634	14370419	-	661	-	hypothetical protein	-
Aco022741	brown	LG24	3142576	3143727	-	1152	-	Phosphate-responsive 1 family protein	-
Aco011416	turquoise	LG01	11755854	11761247	+	1591	-	lecithin:cholesterol acyltransferase 3	-
Aco009487	cyan	LG01	1870221	1870697	+	477	-	Protein of unknown function DUF1677	-
Aco007820	turquoise	LG21	10254681	10258076	-	1036	-	hypothetical protein	-
Aco008622	darkred	LG09	1152822	1154899	-	1956	-	Protein of unknown function DUF1005	-
Aco016970	darkred	LG19	1637131	1638076	-	736	-	NBS-LRR class disease resistance protein	-
Aco028716	blue	LG09	7760543	7766109	-	607	-	Prolyl endopeptidase	-
Aco002481	turquoise	LG04	1292214	1294756	+	1385	-	Epoxide hydrolase	Abhydrolase_1
Aco024560	turquoise	LG01	15192405	15194122	-	543	-	myb-like transcription factor family protein	Myb_DNA-binding
Aco005135	brown	LG07	2391184	2395629	-	2945	-	hypothetical protein	-
Aco011682	brown	LG08	12270336	12273827	+	1682	-	Major facilitator superfamily protein	Sugar_tr
Aco011254	cyan	LG01	13043506	13049455	-	2723	-	Potassium channel	Ion_trans
Aco014832	darkred	LG14	583299	587108	+	1000	-	BAG family molecular chaperone regulator	ubiquitin
Aco012312	brown	LG01	3142226	3145278	+	1444	-	BES1/BZR1 homolog 3	-
Aco018077	turquoise	LG11	8628666	8648621	+	2757	-	hypothetical protein	-
Aco009320	turquoise	LG22	9235147	9237008	+	771	-	Aquaporin-like superfamily protein	-
Aco006012	turquoise	LG16	9718848	9722378	+	2903	-	Protein kinase superfamily protein	Pkinase_Tyr
Aco002604	turquoise	LG06	9538384	9551579	+	2485	-	lipoxygenase 3	Lipoxygenase
Aco022563	turquoise	LG18	969213	979746	+	787	-	Ubiquitin-like superfamily protein	ubiquitin
Aco016861	turquoise	LG04	15439317	15441317	-	1186	-	PAR1 protein	-
Aco006798	purple	LG01	21824470	21834773	-	2763	-	Xyloglucan galactosyltransferase KATAMARI1-like protein	-
Aco020162	brown	LG09	6324106	6327459	-	3213	-	Leucine-rich receptor-like protein kinase family protein	Pkinase_Tyr
Aco000795	brown	LG02	16619032	16622501	+	2195	-	Sodium-dependent dicarboxylate transporter SdcS	Na_sulph_symp
Aco020762	cyan	LG22	4985197	4996866	-	2007	-	M0WDZ6 Peptidyl-prolyl cis-trans isomerase	-
Aco005743	turquoise	LG11	12577217	12581308	-	1120	-	RTE1-homolog	-
novel.434	turquoise	LG06	2191926	2193953	-	689	-	-	-
Aco010499	cyan	LG07	13426526	13427056	-	531	-	Protein of unknown function%2C DUF584	-
Aco028438	blue	LG20	8792977	8795856	+	1966	-	CONSTANS-like protein	CCT
Aco012488	darkred	LG13	1518402	1521864	-	2037	-	Protein kinase family protein	Pkinase_Tyr
Aco013060	purple	LG25	1052175	1062552	+	1953	-	Chitinase family protein	-
Aco005439	turquoise	LG11	10205464	10209208	-	1528	-	ARM repeat superfamily protein	Arm
Aco004336	darkred	LG05	2273136	2291313	+	5709	-	callose synthase 1	DUF605
Aco012033	brown	LG03	14520476	14523679	-	1839	-	tubulin beta chain 2	Tubulin
Aco005270	purple	LG07	3520800	3524533	-	1867	-	purple acid phosphatase 10	Metallophos
Aco001957	brown	LG18	6499117	6506512	+	2011	-	hydroxyproline-rich glycoprotein family protein	-
Aco016543	cyan	LG11	143484	148070	+	2777	-	receptor kinase 2	Pkinase
Aco008310	turquoise	LG19	9348732	9351142	-	1027	-	Cation transport regulator-like protein	ChaC
Aco012175	cyan	LG02	628867	634053	-	1229	-	Chaperone protein DnaJ	DnaJ
Aco013729	darkred	LG13	10804534	10805067	+	534	-	hypothetical protein	-
Aco016319	cyan	LG03	10772290	10773018	-	729	-	RING finger protein	-
Aco021992	brown	LG04	229531	236450	-	3974	-	squamosa promoter binding protein-like 1	SBP
Aco011841	brown	LG08	11106695	11110782	-	3300	-	hypothetical protein	-
Aco021658	darkred	LG16	7167616	7174052	+	1649	-	sequence-specific DNA binding transcription factors	-
Aco005689	turquoise	LG11	12222324	12225593	+	3270	-	Leucine-rich receptor-like protein kinase family protein	Pkinase
Aco022209	darkred	LG17	6227391	6243911	-	4683	-	Protein kinase superfamily protein	Pkinase
Aco006817	turquoise	LG01	21603422	21613074	-	2812	-	RING/U-box superfamily protein	-
Aco004033	brown	LG15	1864427	1865746	-	1320	-	Eukaryotic aspartyl protease family protein	-
Aco005466	turquoise	LG11	10461343	10468810	-	3331	-	Potassium voltage-gated channel subfamily H member	Ion_trans
Aco026086	turquoise	scaffold_841	22120	24994	-	861	-	Iron-sulfur cluster insertion protein ErpA	-
Aco007768	turquoise	LG21	10558220	10559729	+	1397	-	hypothetical protein	-
Aco001736	purple	LG18	8363657	8368540	-	2653	-	Peptidyl-prolyl cis-trans isomerase C	Rhodanese
Aco002787	darkred	LG06	11546613	11549072	+	732	-	hypothetical protein	-
Aco003500	brown	LG17	3344235	3346115	+	1881	-	receptor-like protein kinase 2	Pkinase_Tyr
Aco004087	turquoise	LG15	1491923	1495765	-	1194	-	Ras-related protein Rab-6A	Ras
Aco020618	turquoise	LG02	11499867	11501979	-	2061	-	phenylalanine ammonia-lyase 2	-
novel.1575	cyan	scaffold_2241	9192	13375	-	3800	-	-	-
Aco029670	brown	scaffold_2089	632	13316	+	1462	-	MATE efflux family protein	MatE
Aco009919	turquoise	LG10	1358309	1359969	-	1223	-	Zinc transporter	-
Aco011983	turquoise	LG03	14083749	14095646	-	2421	-	Protein kinase 2.7.10.2	Pkinase
Aco006841	cyan	LG01	21443522	21449347	+	2678	-	Histidine protein methyltransferase-like protein	-
Aco009655	brown	LG01	635260	640631	+	1998	-	TPX2 targeting protein for Xklp2 protein family	-
Aco020278	brown	LG19	6261811	6270272	+	3073	-	Dihydroneopterin aldolase	-
Aco010379	cyan	LG03	1715108	1718123	-	1244	-	ascorbate peroxidase 3	-
Aco021417	turquoise	LG17	7057115	7058062	-	948	-	Protein of unknown function DUF506	-
Aco009711	purple	LG01	160385	165326	+	3106	-	pumilio 12	PUF
Aco022963	cyan	LG16	4102976	4108688	-	1572	-	Adenylyl cyclase-associated protein	-
Aco027816	turquoise	scaffold_1838	15348	18562	-	1862	-	ACT domain repeat 3	ACT
Aco011053	lightcyan	LG04	14103819	14105703	-	1839	-	Zinc finger CCCH domain-containing protein	Ank
Aco003293	darkred	LG17	1807197	1809867	+	1994	-	amino acid permease 3	Aa_trans
Aco004510	darkred	LG05	3658177	3664993	-	2099	-	Nucleotide-diphospho-sugar transferases superfamily protein	-
Aco008513	brown	LG09	418866	423322	-	2035	-	Heparanase-like protein	-
Aco012860	brown	LG03	15260268	15261215	+	948	-	Ethylene-responsive transcription factor	AP2
Aco011587	turquoise	LG06	339680	340895	+	521	-	Bifunctional inhibitor/lipid-transfer protein/seed storage 2S albumin superfamily protein	-
Aco011180	brown	LG04	12989247	12993802	+	2103	-	uncharacterized protein	-
Aco004829	turquoise	LG07	166841	169787	-	1276	-	Isoaspartyl peptidase/L-asparaginase	Asparaginase_2
Aco028075	cyan	scaffold_875	36724	46741	+	1549	-	HGWP repeat containing protein-like protein	-
Aco007548	turquoise	LG08	228168	229652	+	1485	-	P-loop containing nucleoside triphosphate hydrolases superfamily protein	AAA
Aco001290	brown	LG02	12638093	12642545	+	2391	-	Protein of unknown function%2C DUF547	-
Aco010505	turquoise	LG07	13369836	13370724	-	633	-	HSP20-like chaperone RTM2 protein Restricted tev movement 2 Small heat shock-like protein	-
novel.631	brown	LG09	10873064	10875546	-	2483	-	PF16594:Putative AtpZ or ATP-synthase-associated	-
Aco014819	darkred	LG14	693362	697026	+	1793	-	Protein kinase superfamily protein	Pkinase_Tyr
Aco020932	purple	LG05	9559683	9561787	-	1444	-	Alpha-2%2C8-sialyltransferase 8B	Glyco_transf_29
Aco008242	brown	LG19	8770709	8775315	-	3070	-	Cellulose-synthase-like C5	-
Aco007564	lightyellow	LG08	359280	360143	-	864	-	Nucleotide-diphospho-sugar transferases superfamily protein	-
Aco008831	turquoise	LG09	2871808	2873133	+	1149	-	Protein of unknown function DUF506	-
Aco001590	turquoise	LG18	9462255	9465367	+	1220	-	ferritin 2	Ferritin
Aco011921	brown	LG03	13537888	13543389	-	2416	-	DHHC-type zinc finger family protein	-
novel.751	brown	LG11	12823491	12824364	-	874	-	-	-
Aco004065	lightcyan	LG15	1632652	1635720	-	1258	-	Protein kinase superfamily protein	Pkinase
Aco005274	cyan	LG07	3569777	3576975	+	2020	-	Eukaryotic aspartyl protease family protein	-
Aco014798	blue	LG14	875466	895850	+	5667	-	receptor kinase 1	Pkinase_Tyr
Aco012327	brown	LG01	2990788	2999285	+	2288	-	acetylglutamate kinase	AA_kinase
Aco018613	darkred	LG22	2749268	2751799	+	1314	-	S-adenosyl-L-methionine-dependent methyltransferases superfamily protein	-
Aco007766	purple	LG21	10567480	10568103	+	624	-	Peroxiredoxin-2B	-
novel.467	brown	LG07	10880595	10883456	+	2656	-	-	-
Aco014628	darkred	LG08	2606402	2608099	+	1698	-	Xyloglucan galactosyltransferase KATAMARI1-like protein	-
Aco009171	cyan	LG22	8117237	8121506	+	1154	-	expansin-like A1	-
Aco017302	darkred	LG03	16226062	16233165	+	3233	-	Lysine-specific demethylase 5A	JmjC
Aco012231	darkred	LG02	175661	177147	-	1121	-	hypothetical protein	-
Aco014813	lightcyan	LG14	754841	759579	+	3863	-	Receptor-like protein kinase	Pkinase
Aco017533	cyan	LG22	1801049	1810354	+	2159	-	Acid beta-fructofuranosidase	-
Aco012906	purple	LG03	15653376	15659753	+	1317	-	hypothetical protein	-
Aco000155	brown	LG12	4177446	4184677	-	2007	-	Glycogenin-2	Glyco_transf_8
Aco003570	turquoise	LG17	3863396	3870483	+	2316	-	alpha-galactosidase 1	-
Aco023866	purple	LG20	2493368	2503571	+	2239	-	exocyst subunit exo70 family protein A1	Exo70
Aco017271	brown	LG03	16422231	16425231	-	2584	-	Protein kinase family protein	Pkinase_Tyr
Aco018065	blue	LG11	8821155	8825377	+	1551	-	Chaperone protein dnaJ	DnaJ_C
Aco006481	blue	LG14	1981210	1984230	-	1662	-	Protein of unknown function%2C DUF593	-
Aco002663	darkred	LG06	10397515	10398831	-	1317	-	Eukaryotic aspartyl protease family protein	-
Aco003689	turquoise	LG17	5301243	5306492	+	1222	-	Protease HtpX-like protein	Peptidase_M48
Aco025549	darkred	LG10	9298692	9310848	-	2330	-	Plant transposase Ptta/En/Spm family	-
Aco007648	brown	LG08	953213	955719	-	1463	-	Protochlorophyllide reductase	adh_short
Aco010760	darkred	LG10	3529332	3533915	-	1534	-	Protein kinase superfamily protein	Pkinase_Tyr
Aco016931	brown	LG02	2099383	2101473	+	1911	-	CBL-interacting protein kinase 5	Pkinase
Aco017317	turquoise	LG01	23480035	23482547	-	2023	-	Cathepsin B-like cysteine proteinase	Peptidase_C1
Aco028894	cyan	scaffold_1237	1057	10962	+	5237	-	Blue-light-activated histidine kinase	FH2
Aco003966	turquoise	LG15	2407934	2414000	+	1727	-	Guanine nucleotide-binding protein alpha-2 subunit	-
Aco025472	brown	LG02	8806044	8813232	+	1832	-	Lipase	Lipase_3
Aco011959	cyan	LG03	13898684	13904526	+	2311	-	O-fucosyltransferase family protein	-
Aco015078	cyan	LG01	24580115	24585649	-	2075	-	Unconventional prefoldin RPB5 interactor	-
Aco002788	lightcyan	LG06	11555047	11564539	+	1863	-	Phi-1-like phosphate-induced protein	-
Aco006932	darkred	LG22	9907151	9912834	+	2873	-	Protein kinase superfamily protein	Pkinase
Aco006567	lightcyan	LG14	1314823	1315485	-	663	-	Ethylene-responsive transcription factor	AP2
Aco000497	brown	LG12	1465307	1471006	+	2445	-	PolyA RNA polymerase protein	-
Aco011935	turquoise	LG03	13681001	13681973	+	643	-	Defensin-like protein	-
Aco011541	turquoise	LG06	795767	800012	+	1772	-	Protein phosphatase 2C family protein	PP2C
Aco004480	brown	LG05	3495402	3501099	-	2497	-	Acyl-coenzyme A oxidase	-
Aco002035	brown	LG04	5425794	5437074	+	786	-	hypothetical protein	-
Aco012616	darkred	LG13	2807267	2812043	-	2585	-	exostosin family protein	-
Aco016632	turquoise	LG08	10562158	10567600	+	1497	-	receptor kinase 2	Pkinase
Aco020891	blue	LG15	5502683	5509582	-	1782	-	MATE efflux family protein	MatE
Aco016941	darkred	LG02	1822854	1839799	+	4090	-	Multidrug resistance protein ABC transporter family	ABC_tran
Aco011609	brown	LG06	182657	196841	-	1680	-	diacylglycerol kinase 7	-
Aco021416	darkred	LG17	7011291	7014449	-	1721	-	U-box domain-containing protein	U-box
Aco008668	purple	LG09	1433113	1433870	-	669	-	thaumatin-like protein	Thaumatin
Aco003420	darkred	LG17	2747469	2753519	+	1491	-	2-dehydro-3-deoxyphosphooctonate aldolase	-
Aco005346	brown	LG11	9286984	9295836	-	3011	-	mitogen-activated protein kinase 18	Pkinase
Aco008567	cyan	LG09	801304	803596	-	1049	-	maternal effect embryo arrest 14	-
Aco001152	turquoise	LG02	13816227	13826418	+	2490	-	Protein kinase superfamily protein	ABC1
Aco015969	darkred	LG22	653546	659172	-	4212	-	cellulose synthase-like D3	-
Aco002631	brown	LG06	9939030	9940924	+	941	-	hypothetical protein	-
Aco018410	cyan	LG01	4578315	4579001	+	687	-	Plant invertase/pectin methylesterase inhibitor superfamily protein	-
Aco006222	lightcyan	LG16	7796831	7797819	-	972	-	3-hydroxyisobutyrate dehydrogenase	NAD_binding_2
novel.1675	blue	scaffold_620	80175	82904	+	1493	-	-	-
Aco015195	turquoise	LG05	1350809	1354984	+	1450	-	Mitochondrial substrate carrier family protein	Mito_carr
Aco014011	turquoise	LG03	542339	546826	-	1100	-	Peptidyl-tRNA hydrolase ICT1	-
Aco018845	brown	LG08	12958581	12963870	+	1528	-	Protein kinase superfamily protein	Pkinase
Aco001967	purple	LG18	6388974	6393436	+	1812	-	purple acid phosphatase 16	Metallophos
Aco012068	lightcyan	LG02	1692487	1693272	+	786	-	HXXXD-type acyl-transferase family protein	-
Aco015215	darkred	LG05	1187182	1189927	-	1684	-	Zinc transporter	-
Aco008949	purple	LG09	12370250	12374004	-	1573	-	IAA-amino acid hydrolase ILR1-like protein	Peptidase_M20
Aco017170	brown	LG18	660745	665597	+	1868	-	Protein kinase superfamily protein	Pkinase
Aco015574	brown	LG03	12146358	12149007	-	1101	-	IQ-domain 22	IQ
Aco000786	cyan	LG02	16684886	16688506	-	2282	-	serine/threonine protein kinase 2	-
Aco006197	brown	LG16	8062469	8068868	-	2634	-	hypothetical protein	-
Aco021936	blue	scaffold_558	25848	29742	+	1898	-	Tetratricopeptide repeat protein-like protein	-
Aco031386	brown	scaffold_2937	1	3130	-	1225	-	hypothetical protein	-
Aco016259	turquoise	LG03	11401798	11404162	+	2053	-	GATA transcription factor 5	GATA
Aco003557	purple	LG17	3751741	3753387	-	1247	-	Cathepsin B-like cysteine proteinase	Peptidase_C1
Aco016964	lightyellow	LG11	1231892	1236684	-	2289	-	ubiquitin fusion degradation 1	UFD1
Aco001623	brown	LG18	9198404	9200258	-	1677	-	Adenine/guanine permease AZG1	-
Aco017400	turquoise	LG09	3028627	3036507	+	1502	-	Magnesium transporter MRS2-I	-
Aco013519	purple	LG20	937362	939224	+	640	-	hypothetical protein	-
novel.454	turquoise	LG07	2506809	2508451	+	770	-	-	-
Aco006982	lightcyan	LG22	10237683	10240754	+	2617	-	Protein kinase family protein	Pkinase_Tyr
Aco013072	brown	LG25	886137	897028	+	1899	-	Protein kinase 2.7.10.2	Pkinase_Tyr
Aco016528	brown	LG11	283896	295002	+	5999	-	Disease resistance protein CC-NBS-LRR class family	NB-ARC
Aco009902	turquoise	LG10	1247330	1254015	-	1647	-	Cytochrome P450 superfamily protein	p450
Aco012883	cyan	LG03	15481019	15486235	+	1303	-	ureidoglycine aminohydrolase	-
Aco000900	darkred	LG02	15820903	15827479	-	2803	-	18S pre-ribosomal assembly protein gar2-related	-
Aco018519	darkred	LG06	14389411	14389917	-	507	-	hypothetical protein	-
Aco014598	cyan	LG08	2270679	2281490	+	3237	-	Cytochrome P450 superfamily protein	p450
Aco009039	purple	LG09	12995568	12995933	+	366	-	hypothetical protein	-
Aco022348	cyan	LG08	6068817	6083546	+	1878	-	tRNA-modifying protein YgfZ	-
Aco004100	brown	LG15	1373747	1380125	-	1065	-	Heavy metal transport/detoxification superfamily protein	HMA
Aco009805	darkred	LG10	572353	577470	-	3246	-	UDP-Glycosyltransferase superfamily protein	Glycos_transf_1
Aco010646	turquoise	LG07	12198233	12202223	+	1311	-	J3M2K9 Anamorsin homolog Fe-S cluster assembly protein DRE2-like protein	-
Aco011469	brown	LG06	1670601	1676818	-	1668	-	IAA-amino acid hydrolase ILR1-like protein	Peptidase_M20
Aco010594	blue	LG07	12682804	12685476	-	760	-	hypothetical protein	-
Aco005407	cyan	LG11	9953755	9955134	+	1380	-	UDP-Glycosyltransferase superfamily protein	UDPGT
Aco010716	brown	LG10	3016670	3019860	+	1371	-	Argonaute family protein	Piwi
Aco021932	blue	scaffold_558	2672	6103	+	1877	-	strictosidine synthase-like 3	Str_synth
Aco018089	turquoise	LG11	8425144	8429908	+	1645	-	Phosphoglycolate phosphatase	-
Aco011178	brown	LG04	13003381	13026642	+	5048	-	protein kinase family protein	Pkinase
Aco007078	purple	LG23	1475979	1480313	-	1596	-	NADP-binding Rossmann-fold superfamily protein	Epimerase
Aco006453	blue	LG14	2190876	2197998	-	1764	-	adenylate kinase family protein	ADK
Aco002125	turquoise	LG04	4373074	4378473	+	2080	-	Glycosyltransferase family 61 protein	-
Aco012936	turquoise	LG03	15880525	15883828	-	1158	-	AMMECR1 family	-
Aco005283	darkred	LG07	3690513	3694335	+	2920	-	Exostosin-2	-
Aco023275	turquoise	LG02	11156448	11161005	+	1189	-	OBP3-responsive gene 4	-
Aco002101	darkred	LG04	4621104	4643726	+	3868	-	General transcription factor 3C polypeptide	-
Aco009181	darkred	LG22	8243482	8254530	+	1997	-	MATE efflux family protein	MatE
Aco007388	darkred	LG23	4359024	4367763	-	2315	-	Calmodulin-binding protein	-
Aco006479	purple	LG14	1996723	1999004	-	1260	-	F-box/LRR-repeat protein	-
Aco009327	brown	LG22	9275162	9278839	-	2537	-	Domain of unknown function DUF966	-
Aco002417	brown	LG04	1744890	1745099	-	177	-	hypothetical protein	-
Aco010001	darkred	LG10	2087390	2088928	-	1539	-	Plant protein of unknown function DUF641	-
Aco008054	lightcyan	LG21	8395541	8400323	+	1680	-	Histidine protein methyltransferase-like protein	-
Aco013450	darkred	LG15	9626194	9628546	+	1623	-	Regulator of Vps4 activity in the MVB pathway protein	-
novel.193	cyan	LG03	6866487	6867605	+	1119	-	-	-
Aco002972	purple	LG06	12931836	12932701	-	769	-	17.9 kDa class I heat shock protein	-
Aco001236	cyan	LG02	13142099	13142658	-	480	-	heat shock protein 21	-
Aco011219	brown	LG01	13338952	13342656	+	674	-	Subtilase family protein	-
Aco015233	turquoise	LG05	1070468	1074244	-	1389	-	Cytochrome P450 superfamily protein	p450
Aco026283	purple	scaffold_763	10967	33839	-	3593	-	O-methyltransferase family protein	-
Aco013680	darkred	LG13	11263624	11268550	+	1768	-	UDP-sulfoquinovose synthase	Epimerase
Aco006904	cyan	LG22	9657073	9658533	-	700	-	Brown planthopper-induced resistance protein	CBS
Aco015086	brown	LG01	24498520	24499883	+	1165	-	NAC domain containing protein 83	NAM
Aco007474	turquoise	LG12	11903173	11907521	+	1298	-	ALA-interacting subunit 5	-
Aco011872	purple	LG03	13168817	13171748	+	855	-	Protein CURVATURE THYLAKOID 1B	-
novel.936	darkred	LG16	7797822	7798390	+	569	-	-	-
Aco018674	darkred	LG14	4324541	4326030	+	1383	-	Protein of unknown function DUF3133	-
Aco006882	cyan	LG22	9483494	9486405	-	1851	-	2-oxoglutarate 2OG and FeII-dependent oxygenase superfamily protein	2OG-FeII_Oxy
Aco016327	cyan	LG03	10685154	10689141	-	1143	-	Transcription factor TFIIIC%2C tau55-related protein	-
Aco017046	brown	LG08	13829910	13834782	+	2571	-	RING-H2 finger protein 2B	-
Aco027636	blue	scaffold_1385	31079	31595	-	306	-	Gamma aminobutyrate transaminase	Aminotran_3
Aco008722	brown	LG09	1837279	1841799	-	3724	-	Leucine-rich receptor-like protein kinase family protein	Pkinase
Aco003216	turquoise	LG17	1156004	1159417	+	1691	-	Magnesium transporter MRS2-F	-
Aco015172	brown	LG05	1594192	1613348	+	5130	-	ABC transporter G family member	ABC2_membrane
Aco014108	purple	LG13	157211	158608	-	1398	-	HXXXD-type acyl-transferase family protein	-
Aco013408	purple	LG15	10383223	10387605	-	1168	-	GMP synthase glutamine-hydrolyzing	GATase
Aco014174	darkred	LG13	625125	626381	+	477	-	hypothetical protein	-
novel.219	turquoise	LG03	3116287	3124277	-	3556	-	PF07714:Protein tyrosine kinase|PF14380:Wall-associated receptor kinase C-terminal	Pkinase_Tyr
Aco013412	brown	LG15	10346591	10352978	+	3448	-	histidine kinase 3	Response_reg
Aco030134	blue	scaffold_1962	5326	12238	-	2191	-	Protein kinase superfamily protein	-
Aco011915	purple	LG03	13494933	13497659	-	2727	-	Pentatricopeptide repeat-containing protein	-
Aco024612	turquoise	LG07	7924456	7948577	+	684	-	Ribosome-recycling factor	-
Aco013996	purple	LG03	647640	655685	-	2022	-	serine carboxypeptidase-like 34	Peptidase_S10
Aco011824	lightyellow	LG08	11250314	11251455	-	786	-	Chitinase family protein	-
Aco026405	blue	scaffold_650	79187	83151	-	1083	-	RNA-binding protein	RRM_1
Aco011651	turquoise	LG08	12482269	12486353	-	1841	-	glutamate dehydrogenase 2	-
novel.1171	brown	LG21	2560091	2565299	+	4478	-	-	-
Aco027061	brown	LG21	5106440	5113567	-	1423	-	forkhead-associated FHA domain-containing protein	-
Aco021018	brown	LG15	91460	98678	+	2803	-	Beta-glucosidase C	Glyco_hydro_3
Aco002579	brown	LG04	566002	567544	-	1179	-	hypothetical protein	-
Aco019985	cyan	LG03	9222846	9226081	+	789	-	sulfurtransferase 18	Rhodanese
Aco017900	cyan	LG04	12463632	12465668	+	1211	-	myb domain protein 56	Myb_DNA-binding
Aco015533	purple	LG03	12581059	12583820	-	2320	-	arginine decarboxylase 1	-
Aco015797	purple	LG09	10481626	10485234	+	1346	-	expansin-like A1	-
Aco010456	turquoise	LG03	2724367	2747971	+	1772	-	Protein phosphatase 2C family protein	PP2C
Aco006749	cyan	LG01	22202968	22212393	-	2505	-	Ribosomal RNA small subunit methyltransferase B	-
Aco005545	lightyellow	LG11	11166871	11168094	+	1224	-	F-box family protein	-
Aco027573	purple	scaffold_1648	15828	20165	+	2723	-	Cleavage and polyadenylation specificity factor subunit 3-I	Lactamase_B
Aco015205	darkred	LG05	1254210	1257556	+	1575	-	Protein phosphatase 2C family protein	PP2C
novel.642	darkred	LG10	1928647	1932518	+	2315	-	-	-
Aco028700	purple	LG01	19088158	19093985	-	1041	-	Mitochondrial transcription termination factor family protein	-
Aco015427	turquoise	LG23	457789	471842	-	2385	-	NADP-linked oxidoreductase superfamily protein	Aldo_ket_red
Aco021842	turquoise	LG10	11304587	11312107	+	1285	-	Alanine-tRNA ligase	-
Aco007836	darkred	LG21	10140496	10148629	+	2840	-	Transducin/WD40 repeat-like superfamily protein	WD40
Aco002899	turquoise	LG06	12412713	12416429	-	1145	-	dehydroascorbate reductase 1	-
Aco031385	lightyellow	scaffold_2114	1111	13637	-	699	-	hypothetical protein	-
Aco006052	brown	LG16	9370370	9380016	+	3031	-	kinesin 1	Kinesin
Aco001135	brown	LG02	13971200	13980856	-	4160	-	Lipid A export ATP-binding/permease protein MsbA	ABC_membrane
Aco001518	darkred	LG18	9985294	9988654	-	1183	-	Elongator complex protein	-
Aco017258	darkred	LG03	16505576	16510535	-	1373	-	hypothetical protein	-
Aco015994	brown	LG22	399865	413271	-	4354	-	K3Z383 Cytosine-specific methyltransferase 2.1.1.37	DNA_methylase
Aco023470	brown	LG04	6079926	6084973	-	1210	-	NADPH dehydrogenase quinone	FMN_red
Aco016999	turquoise	LG08	13510053	13510973	-	921	-	S-adenosyl-L-methionine-dependent methyltransferases superfamily protein	-
Aco028994	lightyellow	scaffold_652	61741	70024	-	1655	-	Mannose-6-phosphate isomerase 5.3.1.8	-
Aco019040	turquoise	LG20	395195	403150	-	2031	-	nuclear transport factor 2B	-
Aco016633	turquoise	LG08	10570435	10571891	-	854	-	Alpha/beta hydrolase related protein	-
Aco013153	darkred	LG24	7957	55938	-	5603	-	cellulose synthase like G3	-
Aco017268	purple	LG03	16444891	16445622	+	732	-	Bromodomain transcription factor	-
Aco006234	darkred	LG16	7675848	7678403	-	1057	-	Ras-related protein Rab-25	Ras
Aco009000	brown	LG09	12698183	12704526	-	2336	-	Leucine-rich repeat receptor-like protein kinase family protein	-
Aco002430	brown	LG04	1614257	1629342	-	2438	-	2-oxoglutarate 2OG and FeII-dependent oxygenase superfamily protein	2OG-FeII_Oxy
Aco009356	cyan	LG22	7652041	7658639	+	2192	-	beta-galactosidase 14	-
Aco000057	turquoise	LG12	5088813	5107384	-	2368	-	O-methyltransferase family protein	-
Aco028781	turquoise	scaffold_1705	5054	14562	-	2512	-	Elongation factor 1-alpha	GTP_EFTU
novel.2	blue	LG01	130375	136024	+	2323	-	PF00271:Helicase conserved C-terminal domain|PF00270:DEAD/DEAH box helicase	DEAD
Aco030093	blue	scaffold_1109	27643	35829	+	1412	-	Succinyl-CoA ligase ADP-forming subunit alpha	CoA_binding
Aco002983	darkred	LG06	13003762	13007920	+	2359	-	hypothetical protein	Lipase_3
Aco000071	blue	LG12	4938410	4941987	-	1285	-	CASP-like protein	-
Aco002738	brown	LG06	11127758	11137779	-	4570	-	hypothetical protein	-
Aco019015	brown	LG02	10904173	10909293	+	2163	-	TRICHOME BIREFRINGENCE-LIKE 16	-
Aco023613	brown	LG19	2263826	2274149	-	2364	-	3-phosphoshikimate 1-carboxyvinyltransferase	EPSP_synthase
Aco028726	blue	LG03	7510074	7529696	+	1965	-	Protein NRT1/ PTR FAMILY 5.2	-
Aco014323	brown	LG05	440523	448487	+	4353	-	Pleiotropic drug resistance%2C ABC transporter family protein	ABC2_membrane
Aco010131	blue	LG25	3355523	3357822	+	1104	-	hypothetical protein	-
Aco015595	brown	LG03	11900629	11904861	-	2730	-	Protein kinase superfamily protein	Pkinase
Aco012440	purple	LG01	2017805	2021905	+	1307	-	ATP-dependent Clp protease proteolytic subunit	-
Aco019742	blue	LG03	5881134	5897323	+	677	-	60S ribosomal protein L37-2	-
Aco007097	brown	LG23	1603295	1607301	+	603	-	hypothetical protein	-
Aco007358	brown	LG23	3962186	3976585	-	2836	-	protein kinase family protein	Pkinase_Tyr
Aco016298	lightyellow	LG03	10987655	10991217	+	1303	-	Dehydrogenase/reductase SDR family member 7B	adh_short
Aco004612	cyan	LG05	4425464	4432214	-	4144	-	histidine kinase 3	HATPase_c
Aco010262	turquoise	LG25	2481807	2482749	-	505	-	hypothetical protein	-
Aco024474	cyan	LG13	4929146	4946504	+	3867	-	calcium-transporting ATPase	Cation_ATPase_C
Aco020740	brown	LG15	5190938	5204579	+	1388	-	RING/U-box superfamily protein	-
Aco020649	brown	LG02	11845056	11859411	+	1324	-	O-methyltransferase 1	-
Aco013355	turquoise	LG15	10974727	10977198	+	1117	-	embryo defective 1273	-
Aco012122	darkred	LG02	1058235	1059272	-	1038	-	Protein kinase superfamily protein	Pkinase
Aco015166	brown	LG05	1660241	1668489	-	4172	-	Homeobox-leucine zipper protein family	START
Aco003265	brown	LG17	1565951	1568418	+	2102	-	Phosphatidylinositol transfer protein SFH5	CRAL_TRIO_N
Aco010680	darkred	LG10	2680311	2685712	+	3352	-	Tetratricopeptide repeat protein	-
Aco009955	cyan	LG10	1722607	1723669	-	929	-	hypothetical protein	-
Aco012495	brown	LG13	1577157	1594952	+	3156	-	TRICHOME BIREFRINGENCE-LIKE 34	-
Aco009824	brown	LG10	705751	710812	-	1720	-	hypothetical protein	-
Aco005198	turquoise	LG07	2830411	2831818	+	855	-	uncharacterized protein	-
Aco004271	lightyellow	LG15	272206	273293	-	884	-	hypothetical protein	-
Aco014335	purple	LG05	573945	577043	-	1923	-	UDP-Glycosyltransferase superfamily protein	UDPGT
Aco018219	brown	LG01	13895803	13899843	-	1995	-	Protein kinase superfamily protein	Pkinase
Aco031333	cyan	scaffold_1605	4735	5828	+	1009	-	Lipase/lipooxygenase%2C PLAT/LH2 family protein	-
Aco004004	purple	LG15	2084270	2088643	-	1417	-	cold regulated gene 27	-
novel.1074	brown	LG19	2308285	2310669	+	1920	-	PF02892:BED zinc finger|PF04937:Protein of unknown function (DUF 659)	DUF659
Aco008479	blue	LG19	10679421	10684131	+	1522	-	Zinc finger protein CONSTANS-like protein	-
Aco020337	cyan	LG10	12846846	12853029	+	1737	-	Rp1-like protein	-
Aco013039	cyan	LG25	1141510	1148184	-	1819	-	Flavin-containing monooxygenase family protein	FMO-like
Aco013264	brown	LG24	1069767	1076927	-	1958	-	Oxysterol-binding protein-related protein 2A	-
Aco000884	turquoise	LG02	15928054	15932803	-	2236	-	cellulose synthase like E1	-
Aco004559	brown	LG05	4014760	4017688	-	1761	-	basic helix-loop-helix bHLH DNA-binding superfamily protein	HLH
Aco008285	brown	LG19	9182300	9185903	-	1799	-	Ubiquitin-specific protease family C19-related protein	-
Aco027704	blue	scaffold_1063	16007	23075	+	1541	-	plant snare 11	-
Aco001255	brown	LG02	12975135	12977620	+	1306	-	basic helix-loop-helix bHLH DNA-binding superfamily protein	HLH
novel.1668	blue	scaffold_595	10052	33675	+	3315	-	PF06203:CCT motif	CCT
Aco007342	brown	LG23	3706696	3711029	-	2220	-	Beta-1%2C3-galactosyltransferase	Galactosyl_T
Aco014856	darkred	LG14	437140	440899	+	2642	-	hypothetical protein	-
Aco005236	brown	LG07	3182723	3196828	+	5142	-	B4XTS8 Cytosine-specific methyltransferase 2.1.1.37	DNA_methylase
Aco026050	purple	LG14	9782863	9787936	-	1868	-	RNA recognition motif RRM-containing protein-like protein	-
Aco014755	blue	LG20	9358081	9359955	+	1567	-	alpha/beta-Hydrolases superfamily protein	Abhydrolase_3
Aco000118	brown	LG12	4533170	4539440	-	3588	-	hypothetical protein	-
Aco010367	brown	LG03	1516199	1566500	+	4465	-	Cytochrome P450 superfamily protein	p450
Aco018507	brown	LG06	14322971	14323978	-	1008	-	Leucine-rich repeat receptor-like protein kinase family protein	LRRNT_2
Aco002718	blue	LG06	10960110	10981438	+	3483	-	alpha/beta-Hydrolases superfamily protein	Abhydrolase_3
Aco017640	cyan	LG14	5790820	5802524	+	2593	-	Gamma-glutamyltranspeptidase	-
Aco002360	darkred	LG04	2144383	2151019	+	1921	-	S-adenosyl-L-methionine-dependent methyltransferases superfamily protein	-
Aco022749	purple	LG02	5417927	5420401	+	590	-	Plasma membrane H+-ATPase	-
Aco007962	cyan	LG21	9224762	9232024	+	2879	-	Tyrosine-protein kinase BAZ1B	DDT
Aco009040	brown	LG09	13002992	13006665	+	1893	-	MATE efflux family protein	MatE
Aco020933	blue	LG05	9584859	9589312	+	996	-	hypothetical protein	-
Aco005316	blue	LG11	9044963	9051662	-	1657	-	Cytosol aminopeptidase family protein	-
Aco011635	purple	LG08	12630078	12631043	-	861	-	Protein of unknown function DUF581	-
Aco004682	brown	LG05	5017830	5020943	-	1035	-	Adenylate kinase	ADK
Aco012615	cyan	LG13	2805646	2806897	+	694	-	hypothetical protein	-
Aco005291	brown	LG07	3759809	3766767	+	1941	-	5'-AMP-activated protein kinase-related	-
Aco012069	lightcyan	LG02	1691513	1692360	+	550	-	hydroxycinnamoyl-CoA shikimate/quinate hydroxycinnamoyl transferase	-
Aco024125	brown	LG06	4197138	4198879	-	989	-	Peroxidase superfamily protein	-
Aco005261	turquoise	LG07	3454533	3457005	-	619	-	Thioredoxin	-
Aco022553	lightyellow	LG18	1230257	1237650	+	3085	-	Pyrimidine-specific ribonucleoside hydrolase RihA	-
Aco006249	turquoise	LG21	6884852	6898336	-	1933	-	2-oxoglutarate 2OG and FeII-dependent oxygenase superfamily protein	2OG-FeII_Oxy
Aco003789	brown	LG15	4127428	4130727	-	1540	-	CYCLIN D1	Cyclin_C
Aco002540	purple	LG04	836885	838173	+	875	-	Adenine nucleotide alpha hydrolases-like superfamily protein	Usp
Aco026535	brown	scaffold_1119	5925	13722	+	4091	-	Protein of unknown function DUF3049	-
Aco015060	brown	LG01	24714500	24733930	-	4098	-	Pentatricopeptide repeat-containing protein	HORMA
Aco001536	turquoise	LG18	9831736	9837504	-	1648	-	Galactosylgalactosylxylosylprotein 3-beta-glucuronosyltransferase	-
Aco013873	turquoise	LG08	9295304	9296338	+	910	-	Heat stress transcription factor B-2b	HSF_DNA-bind
Aco006868	brown	LG22	9420380	9422908	+	1704	-	F6I670 Serine/threonine-protein kinase 2.7.11.1	B_lectin
Aco004691	brown	LG05	5079356	5087255	-	1567	-	Eukaryotic protein of unknown function DUF914	-
Aco020339	darkred	LG10	12817379	12829921	+	4562	-	Disease resistance protein	NB-ARC
Aco011969	cyan	LG03	13993095	13994527	+	1332	-	ankyrin repeat-containing protein 2	Chromo
Aco029566	blue	scaffold_1234	9569	15357	+	2538	-	Transducin/WD40 repeat-like superfamily protein	-
Aco015337	blue	LG20	10612828	10615225	+	1325	-	G patch domain-containing protein	G-patch
Aco017257	brown	LG03	16512611	16518383	+	2127	-	S-adenosyl-L-methionine-dependent methyltransferases superfamily protein	-
Aco003829	brown	LG15	3549346	3552293	+	1279	-	hypothetical protein	-
Aco010986	cyan	LG04	14628097	14633489	-	3420	-	Protein of unknown function DUF3741	-
Aco015801	blue	LG09	10440831	10447807	+	1443	-	Choline monooxygenase	-
Aco000734	turquoise	LG02	17096147	17101044	-	1815	-	Auxin efflux carrier family protein	-
Aco002845	purple	LG06	12039138	12039902	-	765	-	ATP synthase delta-subunit gene	-
Aco003082	brown	LG06	13702878	13707090	-	2736	-	D6 protein kinase like 2	Pkinase
Aco002874	turquoise	LG06	12250805	12253369	-	1066	-	Methylsterol monooxygenase	-
Aco026024	turquoise	LG10	9385177	9395507	+	1420	-	Protein kinase superfamily protein	Pkinase_Tyr
Aco025963	darkred	scaffold_1038	1033	2203	+	980	-	alpha/beta-Hydrolases superfamily protein	-
Aco007879	turquoise	LG21	9857717	9862604	-	1569	-	PI-PLC X domain-containing protein	-
Aco006014	turquoise	LG16	9708045	9708779	+	735	-	hypothetical protein	-
Aco013003	brown	LG25	1390059	1391897	+	1839	-	F-box/kelch-repeat protein	F-box
Aco004443	cyan	LG05	3235103	3240294	+	1392	-	Lipase class 3-related protein	Lipase_3
Aco011962	turquoise	LG03	13925558	13930112	-	2996	-	Protein of unknown function DUF630 and DUF632	-
Aco023200	turquoise	LG10	5282760	5295686	+	1498	-	Glucose-6-phosphate/phosphate translocator-related	-
Aco009026	darkred	LG09	12888293	12893166	+	2006	-	Glucan endo-1%2C3-beta-glucosidase	Glyco_hydro_17
Aco014306	brown	LG05	384887	396354	+	3639	-	UDP-Glycosyltransferase superfamily protein	UDPGT
Aco018561	cyan	LG06	14728819	14731759	-	517	-	Alpha-galactosidase A	-
Aco012056	cyan	LG03	14684195	14687491	+	1722	-	Flavin-containing monooxygenase family protein	FMO-like
Aco006265	cyan	LG14	3767688	3770489	+	1121	-	calmodulin 7	-
Aco014454	brown	LG07	14137091	14140219	-	1170	-	basic helix-loop-helix bHLH DNA-binding superfamily protein	HLH
Aco012305	turquoise	LG01	3217144	3233878	-	3988	-	Protein kinase superfamily protein	Pkinase
Aco029414	turquoise	scaffold_1326	25954	27770	-	345	-	hypothetical protein	-
Aco031086	blue	scaffold_1593	22808	23697	-	633	-	P0006G05.105	-
Aco013739	purple	LG13	10719403	10721670	+	895	-	Major pollen allergen Bet v 1-G	-
Aco008060	blue	LG21	8315879	8318029	-	1267	-	Protein of unknown function DUF1685	-
Aco002121	brown	LG04	4417946	4424311	-	1062	-	Ubiquitin-conjugating enzyme family protein	UQ_con
Aco011345	darkred	LG01	12249378	12254321	-	2215	-	Protein of unknown function%2C DUF647	-
Aco014541	darkred	LG20	1890758	1893046	-	2289	-	Disease resistance protein TIR-NBS-LRR class family	-
Aco012668	purple	LG05	13429930	13453967	-	3838	-	Multidrug resistance protein MdtK	MatE
Aco016958	darkred	LG11	1136494	1157581	+	3347	-	Disease resistance protein CC-NBS-LRR class family	NB-ARC
Aco006884	purple	LG22	9497164	9500659	+	1439	-	serine/threonine protein phosphatase 2A	Metallophos
Aco030320	blue	scaffold_1776	3414	6620	-	1193	-	RNA recognition motif-containing protein	RRM_1
Aco029694	turquoise	scaffold_859	54442	56971	-	1122	-	Protein kinase superfamily protein	Pkinase
Aco015551	brown	LG03	12409954	12414149	+	1392	-	nucleotide-rhamnose synthase/epimerase-reductase	-
Aco019829	purple	LG07	3857851	3859870	-	767	-	Thioredoxin	-
Aco017280	darkred	LG03	16338069	16351281	+	3411	-	Protein NRT1/ PTR FAMILY 8.3	-
Aco015680	blue	LG19	450046	454507	+	1693	-	Enoyl-acyl-carrier-protein reductase NADH FabI	-
Aco007025	brown	LG23	1109073	1119218	+	2765	-	TBC1 domain family member 8B	TBC
Aco026964	purple	LG11	7592481	7593710	+	1230	-	RING-H2 finger protein 2B	-
Aco016505	cyan	LG11	525215	528408	+	1697	-	uncharacterized protein	-
Aco031431	turquoise	scaffold_3390	823	1624	-	471	-	Annexin	-
Aco024341	brown	LG01	15532794	15538321	+	1629	-	Glucan endo-1%2C3-beta-glucosidase	Glyco_hydro_17
Aco007314	turquoise	LG23	3330195	3336584	+	2159	-	histone H2A 2	Histone
Aco019962	turquoise	LG08	4056947	4074250	+	1723	-	Protein kinase superfamily protein	Pkinase_Tyr
Aco014648	purple	LG08	2927913	2935968	-	935	-	Ras-related protein Rab-18-B	Ras
Aco005168	purple	LG07	2642681	2646961	-	1739	-	Coenzyme Q-binding protein COQ10-like protein	-
Aco016159	turquoise	LG17	11067828	11072166	-	1649	-	Mitochondrial import inner membrane translocase subunit Tim17/Tim22/Tim23 family protein	SAM_1
Aco026582	blue	scaffold_970	1	4383	-	2509	-	Ubiquitin and WLM domain-containing protein	-
Aco018852	brown	LG08	13052823	13056709	+	1312	-	Mitochondrial substrate carrier family protein	Mito_carr
Aco005230	brown	LG07	3127880	3131913	+	862	-	Auxin-responsive protein IAA1	-
Aco021396	purple	LG17	6602257	6607799	-	2328	-	Potassium transporter family protein	K_trans
Aco002177	darkred	LG04	3683137	3692778	+	6196	-	cationic amino acid transporter 2	-
Aco021928	cyan	LG13	4275516	4278749	+	1578	-	Protein kinase superfamily protein	Pkinase
novel.1190	cyan	LG21	1995557	2010890	-	7126	-	PF14244:gag-polypeptide of LTR copia-type|PF07727:Reverse transcriptase (RNA-dependent DNA polymerase)|PF13976:GAG-pre-integrase domain|PF00665:Integrase core domain|PF03810:Importin-beta N-terminal domain	RVT_2
Aco001338	turquoise	LG02	12189745	12206241	-	2065	-	Carbonic anhydrase	-
Aco021024	brown	LG15	128191	136312	+	2917	-	ABC transporter G family member	ABC2_membrane
Aco003921	blue	LG15	2798335	2807085	-	1500	-	dynamin-like protein 6	-
Aco014375	blue	LG05	821957	826404	-	1187	-	hypothetical protein	-
Aco003666	brown	LG17	4836662	4839256	-	1009	-	hypothetical protein	-
Aco018895	lightcyan	LG20	7147386	7159847	-	1771	-	Leucine-rich repeat receptor-like protein kinase family protein	-
Aco012675	lightyellow	LG05	13566159	13569748	+	1963	-	Glycosyltransferase family 61 protein	-
Aco007670	darkred	LG08	1128300	1129085	+	786	-	Late embryogenesis abundant LEA hydroxyproline-rich glycoprotein family	-
Aco022023	brown	LG11	1674824	1687046	-	1212	-	hypothetical protein	-
Aco010540	brown	LG07	13064753	13068504	-	1758	-	Sodium/bile acid cotransporter	-
Aco009689	brown	LG01	352698	360662	+	1251	-	TIFY domain/Divergent CCT motif family protein	Zim
Aco026188	turquoise	LG02	10053153	10054967	-	624	-	hypothetical protein	-
Aco024948	cyan	LG08	7886114	7890346	-	3543	-	Disease resistance protein CC-NBS-LRR class family	NB-ARC
Aco028152	brown	LG10	7293368	7372415	-	2651	-	Leucine-rich repeat protein kinase family protein	-
Aco013956	turquoise	LG03	969476	973994	+	875	-	hypothetical protein	-
Aco010340	cyan	LG25	1915640	1919026	+	1925	-	Phototropic-responsive NPH3 family protein	-
Aco024471	turquoise	LG13	4785161	4786877	-	1302	-	HXXXD-type acyl-transferase family protein	-
Aco007408	turquoise	LG12	12455619	12461855	-	496	-	uncharacterized protein	-
Aco005000	darkred	LG07	1326985	1332161	+	2003	-	Pyridine nucleotide-disulfide oxidoreductase domain-containing protein	-
Aco012630	darkred	LG13	2993408	2997885	-	1851	-	hypothetical protein	-
Aco009107	lightcyan	LG09	13352887	13357692	+	1258	-	Zinc finger protein CONSTANS-like protein	-
Aco020225	cyan	scaffold_250	208778	210696	+	429	-	G7I9Q9 ATP synthase subunit alpha	-
Aco003258	darkred	LG17	1497178	1502213	-	2050	-	Protein of unknown function DUF668	-
Aco006121	cyan	LG16	8693657	8698209	+	1332	-	GDSL esterase/lipase	Lipase_GDSL
novel.276	purple	LG04	13058379	13059020	+	569	-	-	-
Aco003090	turquoise	LG06	13764174	13764560	-	387	-	RING/U-box superfamily protein	-
Aco019884	turquoise	LG18	5506196	5514405	+	1252	-	Endo-1%2C3-1%2C4-beta-D-glucanase	-
Aco014602	purple	LG08	2307815	2310761	+	1660	-	Tetratricopeptide repeat TPR-like superfamily protein	-
Aco012318	brown	LG01	3085575	3089293	-	1352	-	hypothetical protein	-
Aco006011	purple	LG16	9722557	9725134	-	2170	-	Beta-1%2C3-galactosyl-O-glycosyl-glycoprotein beta-1%2C6-N-acetylglucosaminyltransferase	-
Aco009227	brown	LG22	8599587	8603410	-	1858	-	Remorin family protein	-
Aco017174	brown	LG18	608021	608317	-	297	-	hypothetical protein	-
Aco031642	turquoise	scaffold_1497	10580	12284	-	1513	-	Phosphate translocator%2C expressed	-
Aco002464	turquoise	LG04	1392593	1394056	+	414	-	hypothetical protein	-
Aco011405	cyan	LG01	11822333	11827709	-	1614	-	Patatin	-
Aco001943	blue	LG18	6625501	6630002	+	1526	-	hypothetical protein	-
Aco012518	turquoise	LG13	1759455	1761883	+	2121	-	Major facilitator superfamily protein	-
Aco031695	cyan	scaffold_2582	7343	9884	-	2104	-	disease resistance protein I2	-
Aco013971	darkred	LG03	840578	846505	-	3635	-	F-box protein	-
novel.1111	cyan	LG19	8288148	8291874	-	3630	-	-	-
Aco011301	cyan	LG01	12610152	12621732	+	3251	-	hypothetical protein	SNF2_N
Aco010290	brown	LG25	2301459	2307347	-	2390	-	Choline transporter-like protein	-
Aco013189	blue	LG24	354517	362752	-	3276	-	Transcription factor HBP-1a	MFMR
Aco015319	turquoise	LG20	10509643	10511386	+	1200	-	Tetratricopeptide repeat TPR-like superfamily protein	-
Aco010116	turquoise	LG25	3422717	3425431	-	942	-	Harpin binding protein	-
Aco006062	darkred	LG16	9288921	9292657	+	621	-	Bifunctional inhibitor/lipid-transfer protein/seed storage 2S albumin superfamily protein	-
Aco003847	blue	LG15	3375455	3378624	-	905	-	Protein of unknown function%2C DUF538	-
Aco009739	brown	LG10	23095	25590	+	2496	-	Protein kinase superfamily protein	Pkinase
Aco022505	brown	LG22	6118158	6126283	+	1063	-	RING/U-box superfamily protein	-
Aco012452	brown	LG13	1224548	1226811	+	1205	-	DOF zinc finger protein 1	zf-Dof
Aco011636	turquoise	LG08	12617703	12619979	-	489	-	Protein of unknown function DUF581	-
Aco020977	turquoise	LG13	6518691	6520315	-	496	-	hypothetical protein	-
Aco006706	brown	LG01	22542981	22544495	-	1389	-	AP2 domain-containing transcription factor	B3
Aco028953	blue	scaffold_1400	13680	18968	-	1448	-	Succinyl-CoA ligase ADP-forming subunit beta	-
Aco003049	turquoise	LG06	13476104	13476649	-	546	-	Basic-leucine zipper bZIP transcription factor family protein	bZIP_1
Aco003892	brown	LG15	3018080	3026556	-	3043	-	RING/FYVE/PHD zinc finger superfamily protein	-
Aco002759	purple	LG06	11348138	11350654	+	486	-	Blue copper protein	Cu_bind_like
Aco013169	purple	LG24	196343	201258	-	1995	-	RNA polymerase sigma-C factor	Sigma70_r2
Aco013942	darkred	LG03	1107602	1115095	-	2865	-	uncharacterized protein	-
Aco004495	brown	LG05	3582220	3587192	-	2537	-	mitogen-activated protein kinase 18	Pkinase
Aco000232	brown	LG12	3461501	3463377	-	1131	-	NADP-binding Rossmann-fold superfamily protein	adh_short
Aco000777	brown	LG02	16759949	16761607	-	1480	-	Leucine-rich repeat receptor-like protein kinase family protein	LRRNT_2
Aco021939	blue	scaffold_558	49736	61285	+	3043	-	Protein kinase superfamily protein	Pkinase
Aco001334	brown	LG02	12227790	12230805	-	1321	-	hypothetical protein	-
Aco030359	blue	scaffold_2306	7128	12951	-	1747	-	Ribosome biogenesis protein bop1	WD40
Aco011179	purple	LG04	12995061	12999836	+	1440	-	Repressor of RNA polymerase III transcription MAF1-like protein	-
Aco014914	darkred	LG04	10252969	10263798	-	1647	-	Major facilitator superfamily protein	Sugar_tr
Aco006465	brown	LG14	2106526	2111323	-	2242	-	Reticulon family protein	-
Aco001878	turquoise	LG18	7191350	7196901	+	1098	-	Desiccation-related protein PCC13-62	-
Aco014303	turquoise	LG05	371385	373423	-	1843	-	UDP-Glycosyltransferase superfamily protein	UDPGT
Aco008854	cyan	LG09	11498869	11502964	+	1846	-	Glutamyl-tRNAGln amidotransferase subunit A	Amidase
Aco010142	cyan	LG25	3306772	3311279	+	4135	-	hypothetical protein	-
Aco011270	brown	LG01	12864900	12872270	-	2621	-	RNA-binding protein 24-B	RRM_1
Aco030334	cyan	scaffold_1387	6362	17998	-	2681	-	ALA-interacting subunit 1	-
Aco016103	brown	LG21	1359793	1362464	+	1669	-	galacturonosyltransferase 9	Glyco_transf_8
Aco010107	brown	LG25	3500426	3504867	-	2851	-	U-box domain-containing protein	U-box
Aco019262	purple	LG13	3592804	3594066	+	406	-	Tetratricopeptide repeat TPR-like superfamily protein	-
Aco018011	brown	LG01	20494186	20500813	+	1301	-	hypothetical protein	-
Aco000742	brown	LG02	17047540	17050900	-	2899	-	Leucine-rich repeat family protein	-
Aco020323	turquoise	LG10	12986261	12989779	-	2445	-	stachyose synthase	-
Aco024335	blue	scaffold_502	116368	121252	+	3249	-	Importin subunit beta-1	-
Aco005359	purple	LG11	9468333	9469866	-	1322	-	Chlorophyll a-b binding protein	-
Aco011014	turquoise	LG04	14424486	14427440	-	1393	-	hypothetical protein	-
Aco001594	purple	LG18	9444390	9446016	+	830	-	Protein of unknown function%2C DUF538	-
Aco022106	turquoise	LG04	99052	102993	+	1813	-	DNA-binding WRKY	WRKY
Aco016723	brown	LG17	375338	384284	-	2089	-	bZIP transcription factor family protein	bZIP_1
Aco013516	turquoise	LG20	912503	915803	+	745	-	Peptide methionine sulfoxide reductase MsrA	PMSR
Aco026490	cyan	scaffold_488	14414	22151	-	3019	-	Sucrose synthase 2.4.1.13	Glycos_transf_1
Aco005158	purple	LG07	2581409	2589302	+	1661	-	Heat shock protein	-
Aco010978	turquoise	LG04	14678024	14680449	-	1193	-	Protein of unknown function DUF1635	-
Aco021276	turquoise	LG12	8454271	8457293	+	1395	-	Glucose-6-phosphate/phosphate translocator-related	-
novel.579	darkred	LG09	978662	980544	+	1883	-	-	-
Aco013095	brown	LG25	629512	635260	-	1736	-	GDSL esterase/lipase	Lipase_GDSL
Aco009884	turquoise	LG10	1101473	1104490	+	2021	-	S-adenosyl-L-methionine-dependent methyltransferases superfamily protein	-
Aco004284	blue	LG15	191172	196266	+	2119	-	T-complex protein 1 subunit alpha	-
Aco002493	brown	LG04	1182085	1192935	+	1542	-	RING finger protein	-
Aco008456	brown	LG19	10536633	10542726	+	3269	-	glutamate receptor 3.4	ANF_receptor
Aco012557	darkred	LG13	2137585	2142083	-	2814	-	Protein of unknown function DUF3133	-
Aco017688	turquoise	LG14	5153886	5158821	-	2620	-	Digalactosyldiacylglycerol synthase	Glycos_transf_1
Aco009725	darkred	LG01	86519	97399	+	2378	-	Protein kinase superfamily protein	Pkinase
Aco001821	brown	LG18	7652488	7655469	-	886	-	DnaJ-like protein	-
Aco023319	brown	LG08	7564734	7567480	+	1801	-	Glucan endo-1%2C3-beta-glucosidase	Glyco_hydro_17
novel.697	darkred	LG11	4074329	4114099	+	3034	-	PF01554:MatE	MatE
Aco004704	purple	LG05	5183991	5186797	+	1041	-	5-dehydro-2-deoxygluconokinase	PfkB
Aco014378	lightyellow	LG05	846535	851490	-	1771	-	serine/threonine protein phosphatase 2A	Metallophos
Aco000857	brown	LG02	16175754	16180772	+	3117	-	Alkaline alpha-galactosidase alkaline alpha-galactosidase seed imbibition protein	-
Aco013872	turquoise	LG08	9271840	9278673	-	1949	-	trehalase 1	-
Aco009217	brown	LG22	8546722	8558411	-	4283	-	sucrose synthase 6	Glycos_transf_1
Aco016246	turquoise	LG17	9728248	9734806	-	1067	-	Charged multivesicular body protein	ESCRT-III
Aco011169	brown	LG04	13110915	13113605	-	1820	-	Cytochrome P450 superfamily protein	p450
Aco014660	darkred	LG20	9959313	9960678	+	605	-	nudix hydrolase homolog 17	NUDIX
Aco001099	brown	LG02	14245144	14251402	+	3046	-	Beta-1%2C3-galactosyltransferase	Galactosyl_T
Aco009090	turquoise	LG09	13282155	13284442	-	523	-	uncharacterized protein	-
Aco009063	purple	LG09	13104911	13110098	-	1508	-	glucose-6-phosphate/phosphate translocator 2	-
Aco009241	turquoise	LG22	8682882	8688707	+	2049	-	hypothetical protein	-
Aco000743	brown	LG02	17045684	17046956	-	477	-	hypothetical protein	-
Aco002808	brown	LG06	11747552	11750619	-	1292	-	hypothetical protein	-
novel.850	cyan	LG14	10311960	10318770	+	4370	-	-	-
Aco008487	purple	LG19	10710405	10711015	-	327	-	Wound-responsive family protein	-
Aco004306	darkred	LG05	2043392	2057876	-	5094	-	Protein kinase superfamily protein	Pkinase
Aco002385	turquoise	LG04	1950399	1951316	+	918	-	beta-1%2C3-glucanase 1	Glyco_hydro_17
Aco008073	cyan	LG21	8181706	8182140	+	435	-	Oral cancer-overexpressed protein-like protein	-
Aco017094	cyan	LG14	11364546	11369067	-	2012	-	Family of unknown function DUF566	-
Aco001228	turquoise	LG02	13183344	13184283	-	822	-	phi-1-like phosphate-induced protein	-
Aco003486	turquoise	LG17	3203989	3208588	+	1415	-	cyclopropyl isomerase	-
Aco027900	purple	LG03	13140013	13144105	-	1189	-	2-oxoglutarate 2OG and FeII-dependent oxygenase superfamily protein	2OG-FeII_Oxy
Aco007586	turquoise	LG08	542748	548495	+	1950	-	Protein kinase superfamily protein	Pkinase
Aco002825	brown	LG06	11901702	11907231	-	1835	-	Protein TrpH	-
Aco022875	brown	LG01	24126577	24130124	+	2038	-	CBS domain-containing protein	CBS
Aco003823	brown	LG15	3643284	3647580	-	2857	-	hypothetical protein	-
Aco007591	turquoise	LG08	582046	582336	+	291	-	hypothetical protein	-
Aco007643	brown	LG08	918886	920902	-	1515	-	CBS domain-containing protein	-
Aco007947	cyan	LG21	9310518	9317833	-	4311	-	Pectinesterase family protein	-
Aco000308	darkred	LG12	2818376	2819274	+	572	-	hypothetical protein	-
Aco014495	brown	LG07	13825447	13829702	+	1371	-	hypothetical protein	-
Aco006878	blue	LG22	9473672	9475834	+	1695	-	HXXXD-type acyl-transferase family protein	-
Aco022468	cyan	LG02	6238235	6241513	+	847	-	Notchless protein-like protein	-
Aco009720	blue	LG01	121211	129645	+	3673	-	ATP-dependent RNA helicase	HA2
Aco030931	brown	scaffold_2579	1563	5178	+	1628	-	Phosphoglycolate phosphatase	-
Aco009270	brown	LG22	8874128	8876221	-	1140	-	hypothetical protein	-
Aco002945	brown	LG06	12721136	12725699	+	2523	-	formin 8	FH2
Aco011358	purple	LG01	12163756	12165682	-	1271	-	Thioredoxin superfamily protein	-
Aco024369	turquoise	LG07	10459607	10463591	+	1021	-	hypothetical protein	-
Aco009160	blue	LG22	7979885	7985474	+	1468	-	Bifunctional nuclease	-
Aco003649	turquoise	LG17	4587787	4597637	+	2680	-	RecQ-mediated instability protein	-
Aco005624	blue	LG11	11790414	11793187	-	841	-	CASP-like protein	-
Aco016496	purple	LG11	614623	629610	-	5028	-	Lipid A export ATP-binding/permease protein MsbA	ABC_membrane
Aco017230	blue	LG03	16749707	16762130	+	1098	-	hypothetical protein	-
Aco025688	turquoise	scaffold_924	51597	52736	+	1070	-	12-oxophytodienoate reductase	Oxidored_FMN
Aco018699	cyan	LG14	4634157	4641312	-	3311	-	ETO1-like 2	-
Aco005162	brown	LG07	2607024	2607299	-	276	-	hypothetical protein	-
Aco000290	brown	LG12	2949264	2967133	+	3365	-	Protein kinase superfamily protein	Motile_Sperm
Aco004795	darkred	LG05	5852767	5853957	-	1191	-	hypothetical protein	-
Aco010409	cyan	LG03	2084786	2093185	-	1768	-	RNA polymerase sigma-C factor	Sigma70_r4
Aco001812	turquoise	LG18	7748740	7751449	+	1203	-	Peroxisomal membrane protein 11-3	-
Aco003225	darkred	LG17	1205231	1209148	+	1389	-	Protein kinase superfamily protein	Pkinase
Aco018320	brown	LG16	1857732	1859176	+	1332	-	Threonine synthase	PALP
Aco016495	darkred	LG11	641268	751643	-	10119	-	Disease resistance protein CC-NBS-LRR class family	NB-ARC
Aco007051	blue	LG23	1303206	1306833	+	1769	-	hypothetical protein	-
Aco016390	brown	LG10	12445577	12449372	+	1412	-	adenosine kinase 2	PfkB
Aco011199	brown	LG01	13515996	13518584	+	749	-	Subtilase family protein	-
Aco018943	lightyellow	LG12	10630249	10634100	-	2035	-	Protein of unknown function DUF3537	-
Aco024025	darkred	LG14	9376171	9392549	-	2013	-	Nucleobase ascorbate transporter	-
Aco007481	brown	LG12	11802441	11808095	-	1868	-	Protein kinase superfamily protein	-
novel.288	brown	LG04	4379036	4385496	-	3005	-	PF00271:Helicase conserved C-terminal domain|PF00270:DEAD/DEAH box helicase	DEAD
Aco013420	darkred	LG15	10227005	10232556	+	1381	-	Translocase of chloroplast	-
Aco017103	cyan	LG14	11439451	11451427	-	3657	-	UDP-N-acetylglucosamine transferase subunit ALG13-like protein	-
Aco013286	brown	LG24	1359802	1361388	+	1587	-	Cytochrome P450 superfamily protein	p450
Aco007798	blue	LG21	10369981	10370460	-	480	-	ferredoxin 3	Fer2
Aco008477	lightcyan	LG19	10654613	10654969	+	357	-	Calcium-binding EF-hand family protein	-
Aco030731	blue	scaffold_1567	32	1545	-	414	-	Alpha-1%2C4-glucan-protein synthase UDP-forming	-
Aco017710	darkred	LG05	7116896	7120126	+	1022	-	Transmembrane protein	-
Aco021382	brown	LG16	7506926	7513669	+	2627	-	auxin response factor 4	Auxin_resp
Aco018946	lightcyan	LG12	10577291	10583098	+	1996	-	Endoglucanase	-
Aco019983	brown	LG12	8552000	8562898	+	2197	-	microtubule-associated proteins 65-1	-
Aco026871	brown	LG08	13233514	13237167	+	2998	-	Plant protein of unknown function DUF827	-
Aco007350	cyan	LG23	3861651	3875654	+	1786	-	serine carboxypeptidase-like 33	Peptidase_S10
Aco028299	cyan	scaffold_953	46213	52718	+	816	-	Acetylornithine deacetylase	M20_dimer
Aco020338	cyan	LG10	12843284	12846820	+	1809	-	Disease resistance protein	NB-ARC
Aco003818	brown	LG15	3809897	3811762	+	1627	-	Acyl-CoA N-acyltransferases NAT superfamily protein	Acetyltransf_1
Aco001643	lightcyan	LG18	9059367	9062433	+	1545	-	WRKY DNA-binding protein 70	WRKY
Aco010513	brown	LG07	13305494	13307000	+	1149	-	CASP-like protein	-
Aco031587	blue	scaffold_3641	1	974	+	881	-	hypothetical protein	-
Aco005197	brown	LG07	2825572	2829540	-	1534	-	Bifunctional inhibitor/lipid-transfer protein/seed storage 2S albumin superfamily protein	-
Aco003537	brown	LG17	3589118	3596635	+	4357	-	Protein kinase superfamily protein	-
Aco002188	brown	LG04	3545146	3554731	-	2279	-	Beta-glucosidase C	Glyco_hydro_3
Aco004960	brown	LG07	1057122	1064998	-	2102	-	Multidrug resistance protein MdtK	MatE
Aco007353	darkred	LG23	3905699	3908926	-	1017	-	hypothetical protein	-
Aco002322	brown	LG04	2458634	2460424	-	1219	-	sequence-specific DNA binding transcription factors	-
Aco009384	blue	LG22	7347923	7352913	-	776	-	membrane lipoprotein	-
Aco028717	brown	LG09	7777616	7782386	-	1349	-	gamma-tocopherol methyltransferase	Methyltransf_11
Aco017142	turquoise	LG21	4295493	4300372	+	1640	-	P-loop containing nucleoside triphosphate hydrolases superfamily protein	-
Aco016311	brown	LG03	10815704	10819595	+	779	-	Calcium-dependent lipid-binding CaLB domain family protein	C2
Aco009941	lightyellow	LG10	1573503	1574800	-	870	-	Inorganic pyrophosphatase	-
Aco015443	darkred	LG23	590152	591489	+	1338	-	Eukaryotic aspartyl protease family protein	-
Aco016555	blue	LG11	14415	19414	+	1477	-	Ubiquitin system component Cue protein	CUE
Aco007975	brown	LG21	9106322	9118669	+	3311	-	Sucrose-phosphate synthase family protein	Glycos_transf_1
Aco006810	darkred	LG01	21695087	21697475	-	1394	-	hypothetical protein	-
Aco004729	blue	LG05	5365169	5366984	-	1602	-	Transducin/WD40 repeat-like superfamily protein	-
Aco029401	cyan	scaffold_990	25490	28035	-	1685	-	IQ-domain 22	IQ
Aco007240	blue	LG23	2644961	2647797	+	1693	-	nodulin MtN21 /EamA-like transporter family protein	DUF6
Aco016877	turquoise	LG04	15542042	15545789	+	1625	-	Exostosin-2	-
Aco013481	turquoise	LG20	624850	626918	-	927	-	RPM1 interacting protein 4	-
Aco012524	brown	LG13	1805368	1809238	+	1317	-	Peroxidase superfamily protein	-
novel.1680	blue	scaffold_633	39130	40458	+	1177	-	PF13359:DDE superfamily endonuclease	-
Aco030130	turquoise	scaffold_2269	362	670	-	309	-	cytochrome P450%2C family 71%2C subfamily B%2C polypeptide 35	-
Aco013487	brown	LG20	678402	682861	-	1306	-	Magnesium transporter NIPA2	DUF803
Aco008916	darkred	LG09	12136232	12155222	+	6951	-	Disease resistance protein CC-NBS-LRR class family	NB-ARC
Aco004879	brown	LG07	478728	483300	-	1824	-	hypothetical protein	AA_kinase
Aco003491	brown	LG17	3253869	3264337	+	2385	-	ankyrin repeat family protein	-
Aco000427	turquoise	LG12	1918638	1921877	-	1014	-	Mini-ribonuclease	-
Aco006775	brown	LG01	22023464	22027104	-	1640	-	Peptidyl-prolyl cis-trans isomerase B	Pro_isomerase
Aco008813	brown	LG09	2674823	2680962	+	2830	-	serine/threonine protein kinase 2	Pkinase
Aco010268	brown	LG25	2435773	2440685	+	2532	-	Protein kinase family protein	Pkinase_Tyr
Aco014848	purple	LG14	491746	495003	-	2255	-	Polyphenol oxidase I	-
Aco005409	darkred	LG11	9966117	9967880	-	1734	-	BURP domain-containing protein	-
Aco010209	darkred	LG25	2834592	2847776	+	2095	-	Protein kinase superfamily protein	Pkinase
Aco011091	purple	LG04	13797693	13803603	-	2818	-	TBP-associated factor 15B	-
Aco001760	darkred	LG18	8132333	8132783	+	441	-	calmodulin 4	efhand
Aco006381	blue	LG14	2726440	2733529	+	2163	-	5'-nucleotidase domain-containing protein	-
Aco000929	purple	LG02	15542352	15562905	+	3616	-	Cytochrome P450	p450
Aco002661	brown	LG06	10368840	10370551	+	747	-	Eukaryotic aspartyl protease family protein	-
Aco018179	brown	LG12	11383484	11388979	+	2105	-	Ankyrin repeat family protein	-
Aco004845	turquoise	LG07	277293	280242	+	1211	-	Cytochrome b5	-
Aco014436	brown	LG07	14306642	14312876	+	2931	-	Serine/threonine-protein kinase 2.7.11.1	Pkinase_Tyr
Aco010408	purple	LG03	2069211	2081750	+	2123	-	Transmembrane amino acid transporter family protein	Aa_trans
Aco002061	brown	LG04	5127319	5129105	-	1098	-	Formimidoyltransferase-cyclodeaminase	-
Aco026584	darkred	scaffold_970	13096	15299	-	1568	-	Eukaryotic aspartyl protease family protein	-
Aco005758	brown	LG11	12699888	12706223	+	2262	-	Oxygen-dependent choline dehydrogenase	-
novel.984	turquoise	LG17	5825157	5829130	+	3974	-	-	-
Aco000505	darkred	LG12	1395411	1395826	+	270	-	hypothetical protein	-
Aco011946	blue	LG03	13747988	13751779	+	1886	-	Protein kinase superfamily protein	Pkinase
Aco014441	lightcyan	LG07	14248952	14253086	-	958	-	NADPH dehydrogenase quinone	FMN_red
Aco016291	brown	LG03	11075751	11081093	+	3390	-	Myosin heavy chain-related protein	-
novel.806	blue	LG13	8187439	8198615	+	1018	-	-	-
Aco008594	brown	LG09	953332	953757	-	426	-	glycine-rich protein	-
Aco014299	darkred	LG05	349957	352975	-	2427	-	3-ketoacyl-CoA synthase 11	-
Aco029370	blue	scaffold_1554	5	4064	+	853	-	Molybdenum cofactor sulfurase family protein	MOSC
Aco003138	darkred	LG06	14065603	14066022	+	420	-	Calcium-binding EF-hand family protein	-
Aco025422	cyan	scaffold_1051	26948	27415	-	468	-	Auxin-responsive GH3 family protein	-
Aco020133	brown	LG21	6183819	6185705	+	1374	-	BTB/POZ and TAZ domain-containing protein	zf-TAZ
novel.287	cyan	LG04	4063263	4066018	-	860	-	-	-
Aco029151	cyan	scaffold_1466	22232	26107	-	732	-	protein kinase 2B	-
Aco010974	lightcyan	LG04	14725812	14729627	+	1724	-	Domain of unknown function DUF966	-
Aco010240	turquoise	LG25	2655145	2656041	-	897	-	C2H2-type zinc finger family protein	-
Aco001730	cyan	LG18	8415608	8419458	-	1147	-	Aquaporin SIP1-2	-
Aco000358	lightcyan	LG12	2448646	2450713	+	1098	-	WRKY family transcription factor	WRKY
Aco016521	brown	LG11	372662	378624	+	3828	-	Disease resistance protein CC-NBS-LRR class family	NB-ARC
Aco024127	blue	LG03	11705428	11706635	+	1024	-	Homeobox-leucine zipper protein family	Homeobox
Aco011901	brown	LG03	13414473	13420906	+	3842	-	Regulator of chromosome condensation RCC1 family protein	FYVE
Aco002698	cyan	LG06	10766720	10776398	+	2567	-	alpha-amylase-like	-
Aco010859	brown	LG12	5674662	5682579	-	3073	-	U-box domain-containing protein	U-box
Aco014296	turquoise	LG05	326376	331573	-	2161	-	Cytochrome P450 superfamily protein	p450
Aco000913	darkred	LG02	15711010	15715504	+	2782	-	basic helix-loop-helix bHLH DNA-binding superfamily protein	HLH
Aco001652	brown	LG18	9009905	9014468	+	2494	-	receptor-like kinase 902	Pkinase
Aco018383	blue	LG07	12043579	12049154	-	1000	-	Protein canopy-1	-
Aco012787	cyan	LG05	14792065	14795064	+	1212	-	S-adenosyl-L-methionine-dependent methyltransferases superfamily protein	-
Aco018353	brown	LG07	11757990	11759087	+	513	-	hypothetical protein	-
Aco008112	brown	LG21	7716387	7720042	+	2657	-	Ankyrin repeat family protein	-
Aco009743	darkred	LG10	64021	70344	+	1936	-	Peroxidase superfamily protein	RNA_pol_Rpc34
Aco010139	brown	LG25	3316676	3322445	+	2569	-	Fatty acid hydroxylase superfamily	-
Aco025129	darkred	LG06	5084988	5096111	-	1984	-	4-coumarate:CoA ligase 1	AMP-binding
Aco031702	blue	scaffold_3672	1	1041	-	281	-	60S ribosomal protein L38	-
Aco002488	brown	LG04	1222953	1229603	+	1925	-	pectinesterase family protein	-
Aco006429	turquoise	LG14	2369740	2372955	-	1861	-	ACT domain repeat 3	ACT
Aco013131	brown	LG25	56011	273665	+	4499	-	Pentatricopeptide repeat-containing protein	-
Aco015223	darkred	LG05	1140542	1151918	-	2091	-	laccase 12	-
Aco027087	cyan	LG02	7916565	7917557	+	993	-	Protein of unknown function DUF579	-
Aco011211	brown	LG01	13403432	13407242	-	598	-	hypothetical protein	-
Aco028574	blue	LG01	18193442	18195381	+	727	-	hypothetical protein	-
Aco002566	brown	LG04	657322	657930	-	609	-	Transcription factor	-
Aco017553	blue	LG09	34825	37373	+	1130	-	30S ribosomal protein S10	Ribosomal_S10
Aco000369	brown	LG12	2370234	2374526	-	1156	-	Isoamyl acetate-hydrolyzing esterase-like protein	Lipase_GDSL
Aco026943	blue	LG03	5155816	5159047	-	738	-	hypothetical protein	-
Aco018350	brown	LG07	11709464	11715075	-	1804	-	Cytochrome P450 superfamily protein	p450
Aco014398	brown	LG07	14634654	14635924	-	1113	-	Protein of unknown function DUF761	-
novel.1744	cyan	scaffold_929	3666	7114	-	2747	-	PF00665:Integrase core domain|PF07727:Reverse transcriptase (RNA-dependent DNA polymerase)	RVT_2
Aco001523	turquoise	LG18	9938020	9943326	+	2145	-	AP2-like ethylene-responsive transcription factor	AP2
Aco014262	purple	LG05	85426	85764	-	339	-	Small heat shock protein	-
Aco021586	lightyellow	LG05	9222437	9263667	+	1372	-	Thioredoxin family protein	-
Aco008283	darkred	LG19	9174190	9174678	+	489	-	B-box type zinc finger family protein	-
Aco019529	brown	LG07	11314983	11315606	+	624	-	Plant invertase/pectin methylesterase inhibitor superfamily protein	-
Aco004882	turquoise	LG07	505747	523856	+	7593	-	Formin Homology 14	FH2
Aco007095	turquoise	LG23	1588914	1591570	-	2178	-	Pentatricopeptide repeat-containing protein	-
Aco004340	brown	LG05	2327355	2331757	+	2176	-	Calcium-binding EF-hand family protein	Na_Ca_ex
Aco009539	lightyellow	LG01	1462578	1467835	-	1631	-	serine carboxypeptidase-like 51	Peptidase_S10
Aco006084	turquoise	LG16	9015750	9018069	-	1882	-	UDP-Glycosyltransferase superfamily protein	UDPGT
novel.102	brown	LG01	22857786	22858898	-	773	-	-	-
Aco030827	brown	scaffold_2185	746	4389	-	679	-	NOL1/NOP2/sun family protein / antitermination NusB domain-containing protein	-
Aco003121	blue	LG06	13956608	13962530	-	757	-	hypothetical protein	-
Aco012544	brown	LG13	2004202	2006097	-	1453	-	expansin A8	-
Aco004581	purple	LG05	4175696	4179413	-	1275	-	x-ray induced transcript 1	-
Aco023805	brown	LG20	8750915	8754052	-	929	-	uncharacterized protein	-
Aco002536	brown	LG04	860260	860769	+	510	-	hypothetical protein	-
Aco001648	darkred	LG18	9033224	9036380	+	2247	-	Protein of unknown function DUF3133	-
Aco000169	purple	LG12	4070341	4075574	+	2204	-	pumilio 7	PUF
Aco004665	brown	LG05	4883695	4887144	+	1604	-	xyloglucan endotransglucosylase/hydrolase 5	-
Aco010816	brown	LG10	4198874	4204595	-	1052	-	Aquaporin-like superfamily protein	-
Aco019064	turquoise	LG20	163914	164774	-	861	-	Calcium-dependent lipid-binding CaLB domain family protein	-
Aco011470	brown	LG06	1644663	1649205	-	1568	-	Pathogenesis-related thaumatin superfamily protein	Thaumatin
Aco023705	cyan	LG02	8594524	8629552	+	2007	-	sulfate transporter 91	Sulfate_transp
Aco015171	brown	LG05	1612590	1622955	-	4316	-	kinesin-like protein 1	Kinesin
Aco016943	purple	LG02	1792303	1797314	-	2875	-	Phospholipase D 3.1.4.4	C2
Aco007519	brown	LG08	78449	82066	+	1601	-	Receptor expression-enhancing protein	TB2_DP1_HVA22
Aco014550	brown	LG20	2007512	2012261	+	1907	-	Protein kinase superfamily protein	Pkinase
Aco006799	purple	LG01	21791899	21793308	-	1410	-	Xyloglucan galactosyltransferase KATAMARI1-like protein	-
Aco010326	brown	LG25	2059134	2059935	+	762	-	TCP family transcription factor	TCP
Aco009790	turquoise	LG10	443273	444927	-	1455	-	gibberellin 3-oxidase 1	2OG-FeII_Oxy
Aco014531	brown	LG07	13572455	13577584	+	1946	-	Plant protein of unknown function DUF247	-
Aco006132	turquoise	LG16	8629561	8631238	-	1532	-	hypothetical protein	-
Aco016161	brown	LG17	11017448	11025897	-	1697	-	Heparan-alpha-glucosaminide N-acetyltransferase	-
Aco008448	blue	LG19	10467568	10477449	-	2103	-	AT hook motif-containing protein	-
Aco015395	cyan	LG23	251315	258269	+	1848	-	Tetratricopeptide repeat TPR-like superfamily protein	PRP38
Aco013109	purple	LG25	507121	507515	+	222	-	hypothetical protein	-
Aco006081	brown	LG16	9061311	9064407	-	2774	-	UDP-Glycosyltransferase superfamily protein	UDPGT
Aco003623	brown	LG17	4327077	4332803	+	2081	-	hypothetical protein	-
novel.1544	purple	scaffold_1913	11280	17429	-	4467	-	PF00078:Reverse transcriptase (RNA-dependent DNA polymerase)|PF08284:Retroviral aspartyl protease|PF00385:Chromo (CHRromatin Organisation MOdifier) domain|PF00665:Integrase core domain	RVT_1
Aco008705	purple	LG09	1723769	1728883	-	2078	-	cationic amino acid transporter 5	-
Aco013539	brown	LG20	1146015	1150418	+	1683	-	Remorin family protein	-
Aco025308	brown	LG05	14984505	14987416	-	1908	-	myb domain protein 98	-
Aco014596	blue	LG08	2235374	2239683	-	1982	-	Gamma-glutamyl phosphate reductase	-
Aco025457	brown	LG03	4958206	4971985	+	1602	-	Serine incorporator	TMS_TDE
Aco013206	brown	LG24	505249	508553	-	1234	-	LSD1 zinc finger family protein	zf-LSD1
Aco004127	darkred	LG15	1201653	1204840	+	952	-	hypothetical protein	-
Aco015704	lightcyan	LG19	193322	196707	-	2525	-	Domain of unknown function DUF23	-
Aco017172	turquoise	LG18	631489	644940	-	5948	-	kinesin 4	Kinesin
Aco016911	turquoise	LG02	2463672	2467455	-	932	-	temperature-induced lipocalin	Lipocalin_2
Aco004174	blue	LG15	894209	902048	+	2426	-	hypothetical protein	-
Aco004894	brown	LG07	605007	608287	+	1958	-	Protein of unknown function DUF620	-
novel.1649	blue	scaffold_499	61629	74015	+	6867	-	PF00628:PHD-finger|PF00176:SNF2 family N-terminal domain	SNF2_N
Aco022208	brown	LG17	6217166	6226541	-	636	-	rapid alkalinization factor 23	-
Aco004715	turquoise	LG05	5255825	5261338	-	1410	-	hypothetical protein	-
Aco026955	darkred	LG14	9942757	9945104	-	978	-	B3 domain-containing protein	B3
Aco015599	darkred	LG03	11873816	11880546	-	3629	-	Calcium-transporting ATPase	E1-E2_ATPase
Aco025407	turquoise	LG19	5282422	5291690	-	1420	-	GDSL esterase/lipase	Lipase_GDSL
Aco014374	blue	LG05	818599	821344	-	845	-	Iron-sulfur cluster insertion protein ErpA	-
Aco001886	purple	LG18	7142726	7143205	+	480	-	Calcium-dependent lipid-binding CaLB domain family protein	C2
Aco004887	brown	LG07	542075	544990	+	1109	-	basic helix-loop-helix bHLH DNA-binding superfamily protein	-
Aco016879	cyan	LG04	15557060	15564405	+	2289	-	Anthranilate synthase component	-
Aco029055	purple	scaffold_1620	14418	18235	+	1044	-	Plastid-lipid associated protein PAP / fibrillin family protein	-
Aco021703	purple	LG16	2444167	2470083	+	3015	-	Protein kinase superfamily protein	Pkinase_Tyr
Aco013250	blue	LG24	961984	972074	-	3651	-	protein arginine methyltransferase 7	-
Aco007544	brown	LG08	210577	211617	-	904	-	early nodulin-like protein 8	Cu_bind_like
Aco010606	turquoise	LG07	12536883	12540489	+	1068	-	Sec-independent protein translocase protein TatA	-
Aco016271	blue	LG03	11285615	11287638	+	830	-	hypothetical protein	-
Aco028602	turquoise	LG13	7227911	7287760	+	928	-	Chaperone DnaJ-domain superfamily protein	DnaJ
Aco007605	brown	LG08	663363	664742	+	1380	-	Plant protein of unknown function DUF641	-
Aco008197	cyan	LG19	8311681	8329150	-	888	-	hypothetical protein	-
Aco022511	darkred	LG22	6235361	6237081	+	1160	-	hypothetical protein	-
Aco004412	darkred	LG05	3029109	3034565	-	2316	-	Ankyrin repeat family protein	AAA
novel.1353	brown	LG25	2711351	2712461	+	1111	-	-	-
Aco003091	lightyellow	LG06	13777674	13782720	-	1942	-	Zinc finger protein CONSTANS-like protein	CCT
Aco030792	cyan	scaffold_1526	17915	20630	-	1716	-	GRAS family transcription factor	GRAS
Aco020149	brown	LG21	5996817	6018786	-	1144	-	Alpha/beta hydrolase domain-containing protein	-
Aco003346	brown	LG17	2234734	2239867	+	3452	-	Leucine-rich receptor-like protein kinase family protein	Pkinase
Aco023696	brown	LG20	8977457	8985176	-	4315	-	Mechanosensitive ion channel family protein	-
Aco030677	turquoise	LG01	17287400	17308562	-	1143	-	Transmembrane amino acid transporter family protein	Aa_trans
Aco004043	brown	LG15	1800624	1802761	-	984	-	hypothetical protein	-
Aco012095	lightcyan	LG02	1376821	1378143	+	1323	-	UDP-glucose 4-epimerase	Epimerase
Aco009559	brown	LG01	1326760	1329910	-	1516	-	metacaspase 1	Peptidase_C14
Aco001304	darkred	LG02	12500422	12505437	-	2036	-	Protein phosphatase 2C family protein	PP2C
Aco010519	blue	LG07	13246515	13254815	+	5424	-	Disease resistance protein CC-NBS-LRR class family	NB-ARC
Aco012364	purple	LG01	2625154	2628332	+	642	-	hypothetical protein	-
Aco012578	darkred	LG13	2371645	2376772	+	2001	-	Transducin/WD40 repeat-like superfamily protein	-
Aco009648	cyan	LG01	701890	706495	+	1751	-	Mitochondrial substrate carrier family protein	Mito_carr
Aco031175	brown	scaffold_1286	22636	27116	+	1170	-	laccase 7	-
Aco008011	brown	LG21	8857037	8867831	+	2181	-	Potassium voltage-gated channel subfamily H member	Ion_trans
Aco028513	purple	scaffold_848	36484	38106	+	1623	-	Cytochrome P450 superfamily protein	p450
Aco006581	turquoise	LG14	1225050	1229578	-	2232	-	VACUOLAR SORTING RECEPTOR 7	-
Aco015831	purple	LG01	11594203	11594502	+	300	-	uncharacterized protein	-
Aco011117	turquoise	LG04	13620477	13621926	+	976	-	hypothetical protein	-
Aco001319	darkred	LG02	12384290	12388637	-	1901	-	cytochrome P450%2C family 707%2C subfamily A%2C polypeptide 4	p450
Aco009219	turquoise	LG22	8566345	8569732	-	1154	-	Adenylate kinase	ADK
Aco011225	brown	LG01	13308869	13310528	+	670	-	Gibberellin-regulated family protein	-
Aco009762	purple	LG10	215282	219207	-	1662	-	Cytochrome P450 superfamily protein	p450
Aco003036	brown	LG06	13404924	13410993	-	1796	-	TRICHOME BIREFRINGENCE-LIKE 19	-
Aco003479	lightyellow	LG17	3138154	3140104	-	1872	-	Protein kinase superfamily protein	Pkinase
Aco003524	brown	LG17	3508487	3513235	+	1770	-	alpha/beta-Hydrolases superfamily protein	Abhydrolase_3
Aco015862	turquoise	LG01	11261241	11267174	-	2108	-	FBD / Leucine Rich Repeat domains containing protein	-
Aco019338	turquoise	LG03	9524171	9525234	-	507	-	heat shock protein 21	-
Aco013508	brown	LG20	837640	841611	+	3151	-	receptor-like protein kinase 4	Pkinase
Aco003579	brown	LG17	3941852	3942910	-	1059	-	Plant protein of unknown function DUF868	-
Aco004367	turquoise	LG05	2682020	2685240	-	975	-	Acid phosphatase/vanadium-dependent haloperoxidase-related protein	-
Aco005036	brown	LG07	1590948	1594345	-	984	-	actin depolymerizing factor 6	Cofilin_ADF
Aco028377	brown	LG01	16036513	16041686	-	1692	-	nucleobase-ascorbate transporter 12	-
Aco012390	cyan	LG01	2399131	2402685	-	1523	-	23S rRNA guanosine-2'-O-methyltransferase RlmB	SpoU_methylase
Aco029843	darkred	scaffold_2630	3009	8930	-	1952	-	beta-galactosidase 14	-
Aco010630	brown	LG07	12319409	12321771	+	1491	-	Protochlorophyllide reductase	adh_short
Aco012567	brown	LG13	2257114	2273160	+	3840	-	hypothetical protein	-
novel.1019	darkred	LG18	1694112	1706744	+	6149	-	PF03004:Plant transposase (Ptta/En/Spm family)|PF13960:Domain of unknown function (DUF4218)|PF13952:Domain of unknown function (DUF4216)|PF02992:Transposase family tnp2|PF13963:Transposase-associated domain	Transposase_21
Aco011942	blue	LG03	13725633	13728088	-	1297	-	high mobility group B2	HMG_box
Aco025198	brown	LG05	12707755	12710146	-	1953	-	Protein of unknown function DUF1666	-
Aco027897	darkred	LG03	13130433	13134116	-	1711	-	hypothetical protein	-
Aco027754	darkred	scaffold_908	9852	17530	+	1358	-	Pectinacetylesterase family protein	-
Aco011780	turquoise	LG08	11540735	11544147	+	860	-	hypothetical protein	-
Aco005357	brown	LG11	9455346	9460428	+	2351	-	Protein kinase superfamily protein	Pkinase
Aco011632	turquoise	LG08	12642199	12644323	-	1736	-	SBP S-ribonuclease binding protein family protein	-
Aco018144	brown	LG12	11067053	11072720	+	1801	-	Cathepsin B-like cysteine proteinase	Peptidase_C1
Aco015411	turquoise	LG23	340576	344175	+	1431	-	myb domain protein 109	Myb_DNA-binding
Aco024403	brown	LG12	9915463	9927546	-	1063	-	calcineurin B-like 3	-
Aco000289	brown	LG12	2968030	2974189	-	2477	-	Long-chain-fatty-acid-CoA ligase	AMP-binding
Aco011165	turquoise	LG04	13165721	13169491	+	1491	-	DNA-binding bromodomain-containing protein	Bromodomain
Aco028528	turquoise	scaffold_675	43209	70220	-	5988	-	Protein kinase superfamily protein	Pkinase
Aco001171	blue	LG02	13675744	13678653	-	567	-	choline kinase 1	Choline_kinase
Aco013987	brown	LG03	708420	710603	-	946	-	LysM and putative peptidoglycan-binding domain-containing protein	-
Aco023036	turquoise	LG20	2948275	2953301	-	1906	-	Beta-fructofuranosidase%2C insoluble isoenzyme	-
Aco000361	blue	LG12	2417787	2423814	+	2309	-	Long-chain-fatty-acid-CoA ligase	AMP-binding
Aco002115	brown	LG04	4459496	4461070	+	1575	-	GRAS family transcription factor	GRAS
Aco011740	turquoise	LG08	11879320	11882928	-	1172	-	YbaK/aminoacyl-tRNA synthetase-associated domain	-
Aco002473	cyan	LG04	1329628	1331985	-	1438	-	Dormancy/auxin associated family protein	-
Aco008755	turquoise	LG09	2137278	2143780	-	2545	-	calcium dependent protein kinase 1	Pkinase
Aco011137	cyan	LG04	13430126	13430992	-	867	-	ovate family protein 4	-
Aco013005	brown	LG25	1363944	1368763	-	3382	-	glutamate receptor 3.3	ANF_receptor
Aco026795	turquoise	LG05	10888027	10894332	+	495	-	Metallo-hydrolase/oxidoreductase superfamily protein	-
Aco004983	cyan	LG07	1226798	1233463	+	1962	-	Homeobox protein knotted-1-like protein	KNOX2
Aco020316	brown	LG10	13051378	13060378	-	2749	-	Histidine kinase-%2C DNA gyrase B-%2C and HSP90-like ATPase family protein	-
Aco017250	brown	LG03	16569967	16573840	-	987	-	Growth-regulating factor	-
Aco012969	lightcyan	LG03	16137615	16142074	-	1551	-	xyloglucan endotransglucosylase/hydrolase 30	-
Aco017911	cyan	LG04	12576995	12587088	-	5743	-	disease resistance protein TIR-NBS-LRR class	NB-ARC
Aco024137	purple	LG03	11785205	11787494	+	1021	-	hypothetical protein	-
Aco010283	turquoise	LG25	2347773	2349876	+	883	-	Calcium-dependent lipid-binding CaLB domain family protein	C2
Aco018064	lightcyan	LG11	8854846	8858388	+	3291	-	Receptor-like protein kinase	Pkinase
Aco010405	brown	LG03	1990853	1998779	-	2775	-	ABC transporter G family member	ABC2_membrane
Aco012316	brown	LG01	3110088	3114359	+	1446	-	Nucleotide-sugar transporter family protein	-
Aco020578	cyan	LG10	12573556	12576771	-	3216	-	Disease resistance protein	NB-ARC
novel.1418	turquoise	scaffold_1188	23505	24101	-	597	-	-	-
Aco014509	turquoise	LG07	13751909	13755000	+	1390	-	Ras-related protein Rab-37	Ras
Aco015293	purple	LG20	10330781	10335511	-	3523	-	U-box domain-containing protein	U-box
Aco018070	blue	LG11	8783095	8788437	-	941	-	hypothetical protein	-
Aco018928	purple	LG20	7800304	7806477	+	1635	-	Terpenoid cyclases/Protein prenyltransferases superfamily protein	-
Aco027950	cyan	scaffold_1136	38703	41491	-	2063	-	WRKY family transcription factor family protein	WRKY
Aco014582	turquoise	LG08	2112310	2114350	+	1690	-	hypothetical protein	-
Aco010615	brown	LG07	12455743	12461144	+	2863	-	protein kinase family protein	Pkinase
Aco016325	brown	LG03	10699945	10704854	+	1595	-	expansin B3	-
Aco022653	brown	LG02	5628686	5634689	-	1056	-	hydroxyproline-rich glycoprotein family protein	-
Aco007598	darkred	LG08	609877	617497	+	2291	-	protein of unknown function DUF821	-
Aco020436	blue	LG11	7130277	7135570	-	1096	-	RNA-binding protein pno1	-
Aco018464	brown	LG21	2475719	2482691	-	2867	-	hypothetical protein	-
Aco017468	turquoise	LG02	4707273	4758693	-	2634	-	Regulator of Vps4 activity in the MVB pathway protein	-
Aco005146	turquoise	LG07	2509742	2517641	+	2067	-	Protein downstream neighbor of Son	-
Aco002783	lightcyan	LG06	11539089	11539319	+	231	-	uncharacterized protein	-
Aco030274	cyan	scaffold_1756	15974	20506	-	1918	-	cytochrome P450%2C family 707%2C subfamily A%2C polypeptide 4	p450
Aco006531	brown	LG14	1566174	1576955	-	2328	-	Apoptosis-inducing factor	Pyr_redox_2
Aco026402	turquoise	scaffold_650	30387	34991	-	1972	-	Pyruvate kinase family protein	PK
Aco006952	brown	LG22	9999884	10002980	-	1086	-	Rho GDP-dissociation inhibitor	-
Aco026370	cyan	scaffold_980	9222	10559	-	954	-	Hydroxycinnamoyl CoA quinate transferase	-
Aco009392	brown	LG22	7239709	7250089	-	2131	-	glycerol-3-phosphate acyltransferase 9	Acyltransferase
Aco009550	darkred	LG01	1399754	1403614	+	1881	-	RING/U-box superfamily protein	-
Aco008804	lightcyan	LG09	2589013	2591675	-	1098	-	Acyl-CoA N-acyltransferases NAT superfamily protein	-
Aco012123	purple	LG02	1048644	1053556	+	2938	-	protein kinase family protein	Pkinase
Aco028022	blue	scaffold_1008	16158	21678	-	3230	-	Plant regulator RWP-RK family protein	RWP-RK
Aco029564	cyan	scaffold_1018	42733	46947	-	1614	-	GDSL esterase/lipase	Lipase_GDSL
Aco015486	turquoise	LG03	12998077	12998499	-	423	-	RING/U-box superfamily protein	-
Aco031126	purple	scaffold_1310	25943	26506	+	443	-	hypothetical protein	-
Aco009027	brown	LG09	12902626	12908120	+	2039	-	laccase 10	-
Aco014050	darkred	LG03	303338	304168	-	831	-	CCR4-NOT transcription complex subunit	CAF1
Aco000459	cyan	LG12	1692399	1696752	-	1281	-	Acyl-protein thioesterase	Abhydrolase_2
Aco003951	brown	LG15	2546784	2552010	+	723	-	ELF4-like 3	-
Aco030990	purple	scaffold_2758	299	3969	+	1912	-	ABC-type transport system isoform 1 ABC-type transport system isoform 2 ABC-type transport system isoform	-
Aco009956	cyan	LG10	1726086	1730465	-	1251	-	Protein kinase superfamily protein	Pkinase
Aco018404	brown	LG01	4614099	4623346	-	1990	-	Glucan endo-1%2C3-beta-glucosidase	Glyco_hydro_17
Aco023271	brown	LG02	11220323	11224386	-	1009	-	ferredoxin-related	-
Aco012685	turquoise	LG05	13701641	13704468	+	2019	-	Protein kinase superfamily protein	Pkinase
Aco016277	turquoise	LG03	11227406	11227966	+	561	-	SAUR-like auxin-responsive protein family	Auxin_inducible
Aco016859	brown	LG04	15425391	15429758	+	3197	-	Protein of unknown function DUF3527	-
Aco006559	turquoise	LG14	1364989	1373441	+	3183	-	protein kinase family protein	Pkinase
Aco005013	turquoise	LG07	1416655	1426523	+	2562	-	Argonaute family protein	Piwi
Aco021692	brown	LG16	2664503	2666479	-	1695	-	uncharacterized protein	-
Aco013034	turquoise	LG25	1177233	1182084	-	2273	-	galacturonosyltransferase 3	Glyco_transf_8
Aco006103	darkred	LG16	8851211	8855583	+	2434	-	Tetratricopeptide repeat protein	-
Aco027227	turquoise	LG17	8952156	9010633	+	2130	-	hypothetical protein	-
Aco006421	cyan	LG14	2424604	2444215	+	5458	-	TOPLESS-related 1	-
Aco024091	lightyellow	LG20	6190044	6192186	+	1183	-	Protein of unknown function%2C DUF599	-
Aco015769	darkred	LG09	10787119	10788065	-	903	-	UDP-Glycosyltransferase superfamily protein	-
Aco008892	brown	LG09	11900233	11904504	-	1379	-	hypothetical protein	-
Aco013607	blue	LG20	1820670	1828463	-	1683	-	RNA-binding CRS1 / YhbY CRM domain protein	-
Aco005199	brown	LG07	2845678	2850334	-	2677	-	Inositol 1%2C4%2C5-trisphosphate 5-phosphatase	Exo_endo_phos
Aco008841	darkred	LG09	11394928	11395425	+	498	-	hypothetical protein	-
Aco005069	brown	LG07	1806023	1810725	-	3639	-	Leucine-rich receptor-like protein kinase family protein	Pkinase_Tyr
Aco017602	brown	LG07	10890366	10901935	-	2528	-	hypothetical protein	-
Aco002577	blue	LG04	577014	580313	+	1694	-	agenet domain-containing protein	Agenet
Aco014059	turquoise	LG03	217861	220503	+	1431	-	Glyoxylate/hydroxypyruvate reductase B	2-Hacid_dh_C
Aco029152	cyan	scaffold_1466	26204	28656	-	822	-	Protein kinase superfamily protein	-
Aco003866	brown	LG15	3218910	3229073	+	1268	-	Leucine-rich repeat receptor-like protein kinase family protein	-
Aco011061	turquoise	LG04	14055296	14060175	+	1915	-	asparagine synthetase 3	-
novel.509	turquoise	LG07	13554024	13563380	-	2000	-	PF12776:Myb/SANT-like DNA-binding domain	-
Aco014894	darkred	LG14	224858	227294	-	1625	-	basic helix-loop-helix bHLH DNA-binding superfamily protein	-
Aco006126	darkred	LG16	8657664	8665247	+	961	-	Acyl-protein thioesterase	Abhydrolase_2
Aco003026	brown	LG06	13323630	13340463	-	4071	-	trehalose phosphate synthase	-
Aco028177	blue	scaffold_867	15382	20321	-	1196	-	hypothetical protein	-
novel.1195	blue	LG21	4028774	4034314	-	2370	-	PF02992:Transposase family tnp2|PF13963:Transposase-associated domain	Transposase_21
Aco000719	turquoise	LG02	17226273	17242854	+	1801	-	Pentatricopeptide repeat PPR superfamily protein	PPR
Aco013155	brown	LG24	65005	69336	-	2463	-	ABC transporter G family member	ABC2_membrane
Aco019061	brown	LG20	186058	190886	-	2550	-	Protein NRT1/ PTR FAMILY 6.1	-
Aco005010	brown	LG07	1390190	1391624	-	1244	-	SBP S-ribonuclease binding protein family protein	-
Aco018393	brown	LG07	12091515	12096296	-	1023	-	hypothetical protein	-
Aco001962	blue	LG18	6441314	6444656	-	336	-	hypothetical protein	-
Aco007883	brown	LG21	9844855	9850840	+	3034	-	Filament-like plant protein	-
Aco017270	cyan	LG03	16433845	16437581	+	2523	-	Protein kinase family protein	Pkinase
Aco010113	darkred	LG25	3443119	3444552	+	1434	-	Octicosapeptide/Phox/Bem1p family protein	-
Aco020560	cyan	LG04	9413841	9418061	+	1514	-	NAD dependent epimerase/dehydratase	-
Aco002393	cyan	LG04	1886121	1891289	+	1746	-	hypothetical protein	-
Aco005637	lightyellow	LG11	11869839	11871468	-	613	-	uncharacterized protein	-
Aco005805	brown	LG11	12980245	12981491	-	899	-	Lactoylglutathione lyase / glyoxalase I family protein	-
Aco001404	turquoise	LG18	10792608	10792910	+	240	-	hypothetical protein	-
Aco017829	lightyellow	LG21	627191	631723	-	1542	-	Glycerophosphodiester phosphodiesterase GDE1	-
Aco012537	purple	LG13	1922237	1923271	-	804	-	hypothetical protein	-
Aco028550	brown	LG01	5890936	5895570	-	2615	-	phosphatidylinositol-4-phosphate 5-kinase 2	PIP5K
Aco010659	turquoise	LG10	2456133	2456666	+	534	-	hypothetical protein	-
Aco006332	lightyellow	LG14	3145601	3147430	-	847	-	Glutathione S-transferase family protein	GST_C
Aco022010	brown	LG11	1418393	1421236	-	2844	-	Disease resistance protein	NB-ARC
Aco006372	cyan	LG14	2807042	2812817	+	2283	-	Long-chain-fatty-acid-CoA ligase	AMP-binding
Aco004251	turquoise	LG15	396268	404634	-	2906	-	B9RQ05 Protein ROOT HAIR DEFECTIVE-like protein	-
Aco003032	lightyellow	LG06	13387017	13389014	+	1998	-	U-box domain-containing protein	U-box
Aco013440	brown	LG15	9836302	9840633	-	1865	-	3-ketoacyl-CoA synthase 6	-
Aco015729	cyan	LG09	11145355	11146797	+	1443	-	UDP-glucose 4-epimerase	Epimerase
Aco026351	brown	LG19	6939593	6942767	+	2760	-	receptor-like kinase	Pkinase
Aco021545	blue	LG21	6991617	6997651	-	1954	-	B3 domain-containing protein	B3
Aco001289	brown	LG02	12653475	12655535	+	1217	-	Very-long-chain 3-oxoacyl-CoA reductase	adh_short
Aco005335	purple	LG11	9173521	9176060	-	1271	-	hypothetical protein	-
Aco018238	lightcyan	LG01	14185766	14191163	+	1340	-	Inorganic pyrophosphatase	Pyrophosphatase
Aco002037	blue	LG04	5411900	5417824	+	2250	-	hypothetical protein	-
Aco004208	lightcyan	LG15	683324	689862	-	1818	-	Ethylene-responsive transcription factor	-
Aco021070	blue	LG06	7168378	7169551	+	935	-	hypothetical protein	-
Aco011825	lightcyan	LG08	11246368	11247736	+	867	-	NAC domain containing protein 36	NAM
Aco013272	brown	LG24	1170929	1175561	+	1826	-	laccase 6	-
Aco011770	turquoise	LG08	11594505	11595466	+	840	-	Pollen Ole e 1 allergen and extensin family protein	-
Aco014199	blue	LG13	768449	770826	+	1179	-	Pathogenesis-related thaumatin superfamily protein	Thaumatin
Aco001275	brown	LG02	12778542	12790123	-	540	-	hypothetical protein	-
Aco002599	brown	LG06	9437946	9442748	+	1305	-	Nitrilase-like protein	CN_hydrolase
Aco006253	turquoise	LG14	3867541	3872161	-	1972	-	Pyruvate kinase family protein	PK
Aco001065	turquoise	LG02	14499117	14500471	-	751	-	PLANT CADMIUM RESISTANCE 2	-
Aco008671	turquoise	LG09	1457817	1458574	-	669	-	thaumatin-like protein	Thaumatin
Aco004183	brown	LG15	836135	838864	+	1067	-	Bifunctional inhibitor/lipid-transfer protein/seed storage 2S albumin superfamily protein	-
Aco006812	blue	LG01	21671725	21675212	+	1320	-	uncharacterized protein	-
novel.690	cyan	LG11	519302	524027	+	2237	-	-	-
Aco016991	lightcyan	LG08	13459174	13469680	+	3088	-	Lysine-specific demethylase 5A	JmjC
Aco003683	turquoise	LG17	5188867	5189124	-	258	-	hypothetical protein	-
novel.1718	blue	scaffold_809	42420	47082	+	3772	-	PF13963:Transposase-associated domain|PF02992:Transposase family tnp2	Transposase_21
Aco029397	brown	scaffold_1484	27100	27688	+	482	-	Glycoside hydrolase family 28 protein/polygalacturonase family protein Pectin lyase-like protein	-
Aco000866	darkred	LG02	16075042	16082802	+	1515	-	Domain of unknown function DUF2431	-
Aco023191	turquoise	LG10	5175988	5180650	-	681	-	Serine/arginine-rich splicing factor	RRM_1
Aco029585	blue	scaffold_632	37091	37510	-	393	-	Cytochrome P450 superfamily protein	p450
Aco010011	brown	LG10	2160239	2163273	-	1637	-	Protein kinase superfamily protein	Pkinase
Aco016402	purple	LG10	12297117	12298286	+	1170	-	homeobox protein 21	ZF-HD_dimer
Aco022409	blue	LG01	19453318	19455485	+	2034	-	tolB protein-related	PD40
Aco007131	brown	LG23	1900779	1904309	-	1932	-	hypothetical protein	-
Aco001019	brown	LG02	14874815	14876886	+	1258	-	xyloglucan endotransglucosylase/hydrolase 28	-
Aco005732	brown	LG11	12508566	12513919	+	1030	-	Methyltransferase family protein	Methyltransf_12
Aco023222	turquoise	LG02	7298308	7298718	-	411	-	hypothetical protein	-
Aco010779	turquoise	LG10	3717918	3720618	+	593	-	Dynein light chain	-
Aco020068	brown	LG19	1982113	1991808	+	2876	-	F6I582 Peptidyl-prolyl cis-trans isomerase	-
Aco025687	purple	scaffold_924	41410	42063	-	654	-	serine-rich protein-related	-
Aco014256	darkred	LG05	19796	22710	-	2597	-	phosphatidic acid phosphatase-related / PAP2-related	-
Aco015394	blue	LG23	246137	249471	-	1518	-	AP2-like ethylene-responsive transcription factor	-
Aco014099	brown	LG13	78227	85094	-	2602	-	Auxin transporter-like protein	-
Aco011457	brown	LG06	1855948	1861164	+	1632	-	Mitochondrial substrate carrier family protein	Mito_carr
novel.1394	brown	scaffold_1100	26772	27942	+	1171	-	-	-
Aco020521	darkred	LG16	4589408	4590289	-	660	-	hypothetical protein	-
Aco015660	brown	LG19	663571	668355	-	1571	-	uncharacterized protein	-
Aco024660	turquoise	LG19	4133985	4164378	+	1212	-	Calcium-dependent lipid-binding CaLB domain family protein	C2
Aco010331	turquoise	LG25	2019224	2021264	+	1487	-	Chaperone protein DnaJ	DnaJ
Aco029578	brown	scaffold_1156	3	4333	+	2298	-	Presequence protease	-
Aco005383	brown	LG11	9726144	9731630	+	1670	-	Pectin lyase-like superfamily protein	-
Aco011725	turquoise	LG08	11984274	11987472	-	1394	-	Family of unknown function DUF566	-
Aco022164	cyan	LG08	3562722	3568813	-	1316	-	Activating signal cointegrator	-
Aco018883	turquoise	LG20	6988866	6990256	-	840	-	hypothetical protein	-
Aco003784	brown	LG15	4218818	4223414	-	1603	-	hypothetical protein	-
Aco003600	cyan	LG17	4095683	4096162	+	480	-	hypothetical protein	-
Aco015449	turquoise	LG23	630669	632924	+	796	-	hypothetical protein	-
Aco005717	turquoise	LG11	12402647	12408514	+	1626	-	histone deacetylase 1	Hist_deacetyl
Aco003159	brown	LG06	14192814	14196635	+	3579	-	C2 calcium/lipid-binding plant phosphoribosyltransferase family protein	C2
Aco014373	cyan	LG05	813433	818346	+	2124	-	histone deacetylase 1	Hist_deacetyl
Aco014330	turquoise	LG05	509678	511547	-	1296	-	HXXXD-type acyl-transferase family protein	-
Aco001708	brown	LG18	8565512	8568648	+	1214	-	hypothetical protein	-
Aco011603	brown	LG06	227261	230396	+	2587	-	Cellulose-synthase-like C5	-
Aco026888	brown	scaffold_1338	14781	16107	-	1112	-	Chlorophyll a-b binding protein	-
Aco004955	darkred	LG07	1030865	1031404	+	540	-	hypothetical protein	-
Aco027013	brown	LG10	5566181	5571762	+	1393	-	tRNA cytosine34-C5-methyltransferase	-
Aco008368	brown	LG19	9829188	9834527	-	3301	-	Transducin/WD40 repeat-like superfamily protein	-
Aco002794	brown	LG06	11611448	11616847	-	1798	-	RNA-binding protein 24-B	RRM_1
Aco011477	blue	LG06	1562918	1565833	-	753	-	Nucleotide-diphospho-sugar transferases superfamily protein	-
Aco016175	cyan	LG17	10817056	10817343	+	288	-	hypothetical protein	-
Aco011970	cyan	LG03	13995775	14004946	+	2383	-	GDSL esterase/lipase	Lipase_GDSL
Aco023778	cyan	LG07	6027429	6028046	-	618	-	Photosystem I reaction center subunit II	-
Aco001361	cyan	LG02	11989243	11993823	-	800	-	N-alpha-acetyltransferase	Acetyltransf_1
Aco011943	brown	LG03	13728903	13731433	-	1065	-	Transport and Golgi organization protein-like protein	DUF833
Aco009615	brown	LG01	900990	904687	+	1283	-	Expansin	-
Aco003222	brown	LG17	1181825	1189236	-	2758	-	Glutamyl-tRNAGln amidotransferase subunit A	Amidase
Aco001283	turquoise	LG02	12694662	12699109	-	1923	-	Peptidyl-prolyl cis-trans isomerase D	Pro_isomerase
Aco016067	purple	LG21	984211	988633	-	1137	-	hypothetical protein	-
Aco001627	purple	LG18	9173810	9176375	+	995	-	HMG-box high mobility group DNA-binding family protein	-
Aco009371	blue	LG22	7511408	7511938	-	531	-	Chaperone protein DnaJ	DnaJ
Aco002643	brown	LG06	10141670	10147004	-	2270	-	Glucan endo-1%2C3-beta-glucosidase	Glyco_hydro_17
Aco007553	cyan	LG08	269624	270046	-	423	-	Protein of unknown function%2C DUF584	-
Aco012147	brown	LG02	808518	813573	-	1377	-	Pectinesterase 3.1.1.11	-
Aco007034	turquoise	LG23	1198463	1202086	+	2169	-	Interactor of constitutive active ROPs	-
Aco012576	blue	LG13	2356499	2359785	+	915	-	hypothetical protein	-
Aco012394	turquoise	LG01	2371850	2374951	+	1112	-	membrane-anchored ubiquitin-fold protein 2	-
novel.385	cyan	LG05	12273043	12274375	-	431	-	-	-
Aco005793	brown	LG11	12923783	12925798	-	1305	-	Bidirectional sugar transporter N3	-
Aco001685	brown	LG18	8707171	8710061	+	1343	-	myb-like transcription factor family protein	Myb_DNA-binding
Aco008239	cyan	LG19	8749586	8750128	+	543	-	RING finger protein	-
Aco004391	brown	LG05	2855929	2860201	+	2173	-	hypothetical protein	-
Aco005339	brown	LG11	9198120	9198470	-	351	-	P0022D06.19	-
Aco001754	cyan	LG18	8202596	8206072	-	486	-	uncharacterized protein	-
Aco017540	purple	LG22	1871595	1874260	-	1227	-	NADH dehydrogenase ubiquinone complex I%2C assembly factor	-
Aco019346	cyan	LG05	6199167	6202175	+	2217	-	Glycogenin-2	Glyco_transf_8
Aco029091	blue	scaffold_1587	3306	8359	-	2835	-	Pentatricopeptide repeat-containing protein	PPR
Aco002524	brown	LG04	954082	955194	-	1113	-	Protein of unknown function DUF1645	-
Aco021886	brown	LG21	5410931	5413186	-	423	-	uncharacterized protein	-
Aco011991	brown	LG03	14192363	14198396	+	669	-	hypothetical protein	-
Aco011293	brown	LG01	12675416	12683571	+	1880	-	Pectinesterase family protein	-
Aco027240	turquoise	LG13	7453535	7458782	+	669	-	Auxin-binding protein	-
Aco004763	cyan	LG05	5589826	5593819	-	2283	-	Ankyrin repeat family protein	-
Aco015657	brown	LG19	695735	703199	-	1551	-	UDP-N-acetylmuramoylalanine-D-glutamate ligase	-
Aco008685	brown	LG09	1550428	1550952	+	525	-	hypothetical protein	-
Aco016978	brown	LG08	13354167	13356159	+	1793	-	Tetratricopeptide repeat TPR-like superfamily protein	-
Aco016915	cyan	LG02	2361959	2367909	+	1327	-	hypothetical protein	-
Aco014982	brown	LG04	11339088	11340872	+	1785	-	uncharacterized protein	-
novel.1754	blue	scaffold_955	27473	37507	-	7372	-	PF08284:Retroviral aspartyl protease|PF00078:Reverse transcriptase (RNA-dependent DNA polymerase)|PF00098:Zinc knuckle|PF00665:Integrase core domain|PF03732:Retrotransposon gag protein	RVT_1
Aco000417	turquoise	LG12	1990916	1995525	+	1324	-	Pollen-specific protein SF21	Ndr
Aco011333	blue	LG01	12328054	12330698	-	452	-	hypothetical protein	-
Aco008980	turquoise	LG09	12585135	12587371	-	914	-	hypothetical protein	-
Aco001050	cyan	LG02	14616639	14617410	+	627	-	histone H1-3	-
Aco013103	brown	LG25	572176	576022	+	2041	-	Protein of unknown function DUF630 and DUF632	-
Aco030156	turquoise	LG16	4022824	4025879	-	1392	-	RING/FYVE/PHD zinc finger superfamily protein	-
Aco030268	brown	scaffold_1928	8592	12919	-	1522	-	Reticulon family protein	-
Aco012196	brown	LG02	425960	429126	-	2090	-	Beta-1%2C3-galactosyl-O-glycosyl-glycoprotein beta-1%2C6-N-acetylglucosaminyltransferase	-
Aco027570	turquoise	scaffold_641	51634	61782	-	977	-	Leucine-rich repeat protein kinase family protein	-
Aco012598	lightcyan	LG13	2583887	2585780	-	1324	-	NAC domain containing protein 32	NAM
Aco025690	blue	scaffold_522	12507	18427	-	1065	-	Protein kinase superfamily protein	-
Aco003492	cyan	LG17	3265083	3267637	+	1794	-	Mitochondrial transcription termination factor family protein	-
Aco013376	cyan	LG15	10761263	10764964	-	1409	-	Glucan endo-1%2C3-beta-glucosidase	Glyco_hydro_17
Aco029033	blue	scaffold_872	41620	50292	+	1469	-	LA RNA-binding protein	-
Aco016198	cyan	LG17	10532747	10537196	-	878	-	AP-2 complex subunit mu	Adap_comp_sub
Aco017196	cyan	LG18	425736	427662	-	953	-	hypothetical protein	-
Aco020302	brown	LG01	4835799	4836798	-	891	-	high mobility group A	-
Aco024949	turquoise	LG08	7899065	7901473	-	1129	-	F-box protein PP2-B1	-
Aco027180	cyan	scaffold_655	60664	62588	-	1624	-	myb domain protein 86	Myb_DNA-binding
Aco031731	brown	scaffold_1218	7423	9204	+	1089	-	GRAS family transcription factor	GRAS
Aco010516	brown	LG07	13273688	13277893	+	2516	-	Ankyrin repeat domain-containing protein 13C	-
Aco025678	blue	LG07	8506531	8515012	+	600	-	DNA polymerase lambda	-
novel.438	blue	LG06	5056988	5060984	-	2063	-	-	-
Aco005070	lightyellow	LG07	1820294	1821820	+	592	-	Photosystem II 10 kDa polypeptide	-
Aco004248	turquoise	LG15	414754	416003	+	718	-	RING/U-box superfamily protein	-
Aco007410	brown	LG12	12437437	12440350	-	910	-	50S ribosomal protein L24	KOW
[truncated: 1,725 more rows]
